# Supplementary material for: Draft genome sequence and detailed characterization of biofuel production by oleaginous microalga Scenedesmus quadricauda LWG002611
Source: Biotechnol Biofuels. 2018 Nov 9;11:308. doi: 10.1186/s13068-018-1308-4 (PMC6225629; doi:10.1186/s13068-018-1308-4)
Supplement: Supplementary file 5 — Additional file 5. Reference-guided assembly gene ontology. [file 13068_2018_1308_MOESM5_ESM.xlsx]

## Sheet: Sheet0
Entry	Entry name	Status	Protein names	Gene names	Organism	Pathway	Catalytic activity	Gene ontology (GO)	Gene ontology (biological process)	Gene ontology (molecular function)	Gene ontology (cellular component)	yourlist:M20170705AAFB7E4D2F1D05654627429E83DA5CCEBECCB99
A0A0D2KCW6	A0A0D2KCW6_9CHLO	unreviewed	Pyruvate,orthophosphate dikinase (EC 2.7.9.1)	MNEG_0001	Monoraphidium neglectum			kinase activity [GO:0016301]; pyruvate, phosphate dikinase activity [GO:0050242]		kinase activity [GO:0016301]; pyruvate, phosphate dikinase activity [GO:0050242]		25726119
A0A0D2LNS0	A0A0D2LNS0_9CHLO	unreviewed	GrpE protein homolog	MNEG_0002	Monoraphidium neglectum			mitochondrial matrix [GO:0005759]; adenyl-nucleotide exchange factor activity [GO:0000774]; chaperone binding [GO:0051087]; isomerase activity [GO:0016853]; protein homodimerization activity [GO:0042803]; protein folding [GO:0006457]	protein folding [GO:0006457]	adenyl-nucleotide exchange factor activity [GO:0000774]; chaperone binding [GO:0051087]; isomerase activity [GO:0016853]; protein homodimerization activity [GO:0042803]	mitochondrial matrix [GO:0005759]	25726120
A0A0D2MZR7	A0A0D2MZR7_9CHLO	unreviewed	Uncharacterized protein	MNEG_0003	Monoraphidium neglectum							25726121
A0A0D2NV36	A0A0D2NV36_9CHLO	unreviewed	Ubiquitin-conjugating enzyme E2 N (EC 6.3.2.19)	MNEG_0004	Monoraphidium neglectum			ATP binding [GO:0005524]; ligase activity [GO:0016874]		ATP binding [GO:0005524]; ligase activity [GO:0016874]		25726122
A0A0D2N6L4	A0A0D2N6L4_9CHLO	unreviewed	Uncharacterized protein	MNEG_0005	Monoraphidium neglectum							25726123
A0A0D2KCX1	A0A0D2KCX1_9CHLO	unreviewed	Uncharacterized protein	MNEG_0006	Monoraphidium neglectum							25726124
A0A0D2LNS4	A0A0D2LNS4_9CHLO	unreviewed	5-methyltetrahydropteroyltriglutamate--homocysteine S-methyltransferase (EC 2.1.1.14)	MNEG_0007	Monoraphidium neglectum			5-methyltetrahydropteroyltriglutamate-homocysteine S-methyltransferase activity [GO:0003871]; zinc ion binding [GO:0008270]; methionine biosynthetic process [GO:0009086]	methionine biosynthetic process [GO:0009086]	5-methyltetrahydropteroyltriglutamate-homocysteine S-methyltransferase activity [GO:0003871]; zinc ion binding [GO:0008270]		25726125
A0A0D2MZS2	A0A0D2MZS2_9CHLO	unreviewed	50S ribosomal protein L18	MNEG_0008	Monoraphidium neglectum			ribosome [GO:0005840]; structural constituent of ribosome [GO:0003735]; translation [GO:0006412]	translation [GO:0006412]	structural constituent of ribosome [GO:0003735]	ribosome [GO:0005840]	25726126
A0A0D2NV43	A0A0D2NV43_9CHLO	unreviewed	Alpha-1,2 glucosyltransferase ALG10 (EC 2.4.1.-)	MNEG_0009	Monoraphidium neglectum			endoplasmic reticulum membrane [GO:0005789]; integral component of membrane [GO:0016021]; dolichyl-phosphate-glucose-glycolipid alpha-glucosyltransferase activity [GO:0004583]; dolichol-linked oligosaccharide biosynthetic process [GO:0006488]	dolichol-linked oligosaccharide biosynthetic process [GO:0006488]	dolichyl-phosphate-glucose-glycolipid alpha-glucosyltransferase activity [GO:0004583]	endoplasmic reticulum membrane [GO:0005789]; integral component of membrane [GO:0016021]	25726127
A0A0D2N6L9	A0A0D2N6L9_9CHLO	unreviewed	Uncharacterized protein	MNEG_0010	Monoraphidium neglectum							25726128
A0A0D2KCX6	A0A0D2KCX6_9CHLO	unreviewed	Uncharacterized protein	MNEG_0011	Monoraphidium neglectum							25726129
A0A0D2LNS9	A0A0D2LNS9_9CHLO	unreviewed	Uncharacterized protein	MNEG_0012	Monoraphidium neglectum			aspartic-type endopeptidase activity [GO:0004190]		aspartic-type endopeptidase activity [GO:0004190]		25726130
A0A0D2MZS7	A0A0D2MZS7_9CHLO	unreviewed	Uncharacterized protein	MNEG_0013	Monoraphidium neglectum			integral component of membrane [GO:0016021]; serine-type endopeptidase activity [GO:0004252]		serine-type endopeptidase activity [GO:0004252]	integral component of membrane [GO:0016021]	25726131
A0A0D2NV49	A0A0D2NV49_9CHLO	unreviewed	Uncharacterized protein	MNEG_0014	Monoraphidium neglectum							25726132
A0A0D2N6M6	A0A0D2N6M6_9CHLO	unreviewed	Uncharacterized protein	MNEG_0015	Monoraphidium neglectum							25726133
A0A0D2KCY2	A0A0D2KCY2_9CHLO	unreviewed	Uncharacterized protein	MNEG_0016	Monoraphidium neglectum							25726134
A0A0D2LNT4	A0A0D2LNT4_9CHLO	unreviewed	Uncharacterized protein	MNEG_0017	Monoraphidium neglectum							25726135
A0A0D2MZT3	A0A0D2MZT3_9CHLO	unreviewed	Uncharacterized protein	MNEG_0018	Monoraphidium neglectum			carbohydrate binding [GO:0030246]		carbohydrate binding [GO:0030246]		25726136
A0A0D2NV56	A0A0D2NV56_9CHLO	unreviewed	Uncharacterized protein	MNEG_0019	Monoraphidium neglectum			integral component of membrane [GO:0016021]			integral component of membrane [GO:0016021]	25726137
A0A0D2N6N2	A0A0D2N6N2_9CHLO	unreviewed	Carotene biosynthesis-related protein CBR	MNEG_0020	Monoraphidium neglectum			integral component of membrane [GO:0016021]			integral component of membrane [GO:0016021]	25726138
A0A0D2KCZ3	A0A0D2KCZ3_9CHLO	unreviewed	Diaminohydroxyphosphoribosylaminopyrimidine deaminase (EC 1.1.1.193)	MNEG_0021	Monoraphidium neglectum			5-amino-6-(5-phosphoribosylamino)uracil reductase activity [GO:0008703]; diaminohydroxyphosphoribosylaminopyrimidine deaminase activity [GO:0008835]; zinc ion binding [GO:0008270]; riboflavin biosynthetic process [GO:0009231]	riboflavin biosynthetic process [GO:0009231]	5-amino-6-(5-phosphoribosylamino)uracil reductase activity [GO:0008703]; diaminohydroxyphosphoribosylaminopyrimidine deaminase activity [GO:0008835]; zinc ion binding [GO:0008270]		25726139
A0A0D2LNT9	A0A0D2LNT9_9CHLO	unreviewed	Uncharacterized protein (Fragment)	MNEG_0022	Monoraphidium neglectum			ATP binding [GO:0005524]; nucleic acid binding [GO:0003676]		ATP binding [GO:0005524]; nucleic acid binding [GO:0003676]		25726140
A0A0D2MZT8	A0A0D2MZT8_9CHLO	unreviewed	Uncharacterized protein	MNEG_0023	Monoraphidium neglectum							25726141
A0A0D2NV61	A0A0D2NV61_9CHLO	unreviewed	Uncharacterized protein	MNEG_0024	Monoraphidium neglectum							25726142
A0A0D2KCU5	A0A0D2KCU5_9CHLO	unreviewed	Uncharacterized protein	MNEG_0025	Monoraphidium neglectum							25726143
A0A0D2LNQ5	A0A0D2LNQ5_9CHLO	unreviewed	Uncharacterized protein	MNEG_0026	Monoraphidium neglectum							25726144
A0A0D2MZP7	A0A0D2MZP7_9CHLO	unreviewed	Glutathione reductase (NADPH) (EC 1.8.1.7)	MNEG_0027	Monoraphidium neglectum			cell [GO:0005623]; flavin adenine dinucleotide binding [GO:0050660]; glutathione-disulfide reductase activity [GO:0004362]; cell redox homeostasis [GO:0045454]	cell redox homeostasis [GO:0045454]	flavin adenine dinucleotide binding [GO:0050660]; glutathione-disulfide reductase activity [GO:0004362]	cell [GO:0005623]	25726145
A0A0D2NV08	A0A0D2NV08_9CHLO	unreviewed	Uncharacterized protein	MNEG_0028	Monoraphidium neglectum							25726146
A0A0D2N6J2	A0A0D2N6J2_9CHLO	unreviewed	Alpha-ketoglutarate permease	MNEG_0029	Monoraphidium neglectum			integral component of membrane [GO:0016021]; transmembrane transporter activity [GO:0022857]		transmembrane transporter activity [GO:0022857]	integral component of membrane [GO:0016021]	25726147
A0A0D2KCV0	A0A0D2KCV0_9CHLO	unreviewed	Alpha-ketoglutarate permease	MNEG_0030	Monoraphidium neglectum			integral component of membrane [GO:0016021]; transmembrane transporter activity [GO:0022857]		transmembrane transporter activity [GO:0022857]	integral component of membrane [GO:0016021]	25726148
A0A0D2LNQ9	A0A0D2LNQ9_9CHLO	unreviewed	Uncharacterized protein	MNEG_0031	Monoraphidium neglectum							25726149
A0A0D2MZQ0	A0A0D2MZQ0_9CHLO	unreviewed	Cytochrome b5 domain-containing protein 1	MNEG_0032	Monoraphidium neglectum							25726150
A0A0D2NV15	A0A0D2NV15_9CHLO	unreviewed	Uncharacterized protein	MNEG_0033	Monoraphidium neglectum							25726151
A0A0D2N6J8	A0A0D2N6J8_9CHLO	unreviewed	DNA cross-link repair 1A protein	MNEG_0034	Monoraphidium neglectum							25726152
A0A0D2KCV3	A0A0D2KCV3_9CHLO	unreviewed	Uncharacterized protein	MNEG_0035	Monoraphidium neglectum							25726153
A0A0D2LNR3	A0A0D2LNR3_9CHLO	unreviewed	GTP cyclohydrolase II (EC 4.1.99.12)	MNEG_0036	Monoraphidium neglectum			3,4-dihydroxy-2-butanone-4-phosphate synthase activity [GO:0008686]; GTP cyclohydrolase II activity [GO:0003935]; riboflavin biosynthetic process [GO:0009231]	riboflavin biosynthetic process [GO:0009231]	3,4-dihydroxy-2-butanone-4-phosphate synthase activity [GO:0008686]; GTP cyclohydrolase II activity [GO:0003935]		25726154
A0A0D2MZQ4	A0A0D2MZQ4_9CHLO	unreviewed	Conserved oligomeric Golgi complex subunit 2	MNEG_0037	Monoraphidium neglectum			membrane [GO:0016020]; Golgi organization [GO:0007030]; protein transport [GO:0015031]	Golgi organization [GO:0007030]; protein transport [GO:0015031]		membrane [GO:0016020]	25726155
A0A0D2NV23	A0A0D2NV23_9CHLO	unreviewed	Putative rRNA-processing protein UTP23 like protein	MNEG_0038	Monoraphidium neglectum			small-subunit processome [GO:0032040]			small-subunit processome [GO:0032040]	25726156
A0A0D2N6K4	A0A0D2N6K4_9CHLO	unreviewed	Uncharacterized protein	MNEG_0039	Monoraphidium neglectum			integral component of membrane [GO:0016021]			integral component of membrane [GO:0016021]	25726157
A0A0D2KCV8	A0A0D2KCV8_9CHLO	unreviewed	Uncharacterized protein	MNEG_0040	Monoraphidium neglectum			integral component of membrane [GO:0016021]			integral component of membrane [GO:0016021]	25726158
A0A0D2LNR6	A0A0D2LNR6_9CHLO	unreviewed	Uncharacterized protein	MNEG_0041	Monoraphidium neglectum							25726159
A0A0D2MZQ8	A0A0D2MZQ8_9CHLO	unreviewed	Fibrocystin-like protein (EC 3.2.1.3)	MNEG_0042	Monoraphidium neglectum			glucan 1,4-alpha-glucosidase activity [GO:0004339]; metabolic process [GO:0008152]	metabolic process [GO:0008152]	glucan 1,4-alpha-glucosidase activity [GO:0004339]		25726160
A0A0D2NV31	A0A0D2NV31_9CHLO	unreviewed	Uncharacterized protein	MNEG_0043	Monoraphidium neglectum							25726161
A0A0D2N6K7	A0A0D2N6K7_9CHLO	unreviewed	Fibrocystin-L-like protein (EC 3.2.1.3)	MNEG_0044	Monoraphidium neglectum			integral component of membrane [GO:0016021]; glucan 1,4-alpha-glucosidase activity [GO:0004339]; metabolic process [GO:0008152]	metabolic process [GO:0008152]	glucan 1,4-alpha-glucosidase activity [GO:0004339]	integral component of membrane [GO:0016021]	25726162
A0A0D2MZN1	A0A0D2MZN1_9CHLO	unreviewed	Uncharacterized protein	MNEG_0045	Monoraphidium neglectum			nucleosome [GO:0000786]; DNA binding [GO:0003677]; nucleosome assembly [GO:0006334]	nucleosome assembly [GO:0006334]	DNA binding [GO:0003677]	nucleosome [GO:0000786]	25726163
A0A0D2NUY0	A0A0D2NUY0_9CHLO	unreviewed	Alpha-acetolactate decarboxylase (EC 4.1.1.5)	MNEG_0046	Monoraphidium neglectum			acetolactate decarboxylase activity [GO:0047605]; acetoin biosynthetic process [GO:0045151]	acetoin biosynthetic process [GO:0045151]	acetolactate decarboxylase activity [GO:0047605]		25726164
A0A0D2N6H1	A0A0D2N6H1_9CHLO	unreviewed	Acetolactate synthase, catabolic (EC 2.2.1.6)	MNEG_0047	Monoraphidium neglectum			acetolactate synthase activity [GO:0003984]; thiamine pyrophosphate binding [GO:0030976]		acetolactate synthase activity [GO:0003984]; thiamine pyrophosphate binding [GO:0030976]		25726165
A0A0D2KCT2	A0A0D2KCT2_9CHLO	unreviewed	Uncharacterized protein	MNEG_0048	Monoraphidium neglectum			nucleosome [GO:0000786]; nucleus [GO:0005634]; DNA binding [GO:0003677]; nucleosome assembly [GO:0006334]	nucleosome assembly [GO:0006334]	DNA binding [GO:0003677]	nucleosome [GO:0000786]; nucleus [GO:0005634]	25726166
A0A0D2LNP3	A0A0D2LNP3_9CHLO	unreviewed	Transforming protein Myb	MNEG_0049	Monoraphidium neglectum			DNA binding [GO:0003677]		DNA binding [GO:0003677]		25726167
A0A0D2MZN5	A0A0D2MZN5_9CHLO	unreviewed	Dehydrogenase/reductase SDR family member 7B (EC 1.1.-.-)	MNEG_0050	Monoraphidium neglectum			oxidoreductase activity [GO:0016491]		oxidoreductase activity [GO:0016491]		25726168
A0A0D2NUY7	A0A0D2NUY7_9CHLO	unreviewed	3-ketoacyl-CoA synthase 6 (EC 2.3.1.-)	MNEG_0051	Monoraphidium neglectum			membrane [GO:0016020]; transferase activity, transferring acyl groups other than amino-acyl groups [GO:0016747]; fatty acid biosynthetic process [GO:0006633]	fatty acid biosynthetic process [GO:0006633]	transferase activity, transferring acyl groups other than amino-acyl groups [GO:0016747]	membrane [GO:0016020]	25726169
A0A0D2N6H6	A0A0D2N6H6_9CHLO	unreviewed	Chaperone BCS1	MNEG_0052	Monoraphidium neglectum			mitochondrion [GO:0005739]; ATP binding [GO:0005524]; mitochondrial respiratory chain complex III assembly [GO:0034551]	mitochondrial respiratory chain complex III assembly [GO:0034551]	ATP binding [GO:0005524]	mitochondrion [GO:0005739]	25726170
A0A0D2KCT5	A0A0D2KCT5_9CHLO	unreviewed	Uncharacterized protein	MNEG_0053	Monoraphidium neglectum							25726171
A0A0D2LNP8	A0A0D2LNP8_9CHLO	unreviewed	Uncharacterized protein	MNEG_0054	Monoraphidium neglectum							25726172
A0A0D2MZN9	A0A0D2MZN9_9CHLO	unreviewed	Uncharacterized protein	MNEG_0055	Monoraphidium neglectum			protein polyglutamylation [GO:0018095]	protein polyglutamylation [GO:0018095]			25726173
A0A0D2NUZ4	A0A0D2NUZ4_9CHLO	unreviewed	Uncharacterized protein	MNEG_0056	Monoraphidium neglectum							25726174
A0A0D2N6I1	A0A0D2N6I1_9CHLO	unreviewed	Uncharacterized protein	MNEG_0057	Monoraphidium neglectum							25726175
A0A0D2KCU0	A0A0D2KCU0_9CHLO	unreviewed	Uncharacterized protein	MNEG_0058	Monoraphidium neglectum							25726176
A0A0D2LNQ2	A0A0D2LNQ2_9CHLO	unreviewed	Uncharacterized protein	MNEG_0059	Monoraphidium neglectum							25726177
A0A0D2MZP2	A0A0D2MZP2_9CHLO	unreviewed	Uncharacterized protein	MNEG_0060	Monoraphidium neglectum							25726178
A0A0D2NV02	A0A0D2NV02_9CHLO	unreviewed	Uncharacterized protein	MNEG_0061	Monoraphidium neglectum							25726179
A0A0D2N6I6	A0A0D2N6I6_9CHLO	unreviewed	DNA-dependent protein kinase catalytic subunit	MNEG_0062	Monoraphidium neglectum			kinase activity [GO:0016301]		kinase activity [GO:0016301]		25726180
A0A0D2N6F9	A0A0D2N6F9_9CHLO	unreviewed	Uncharacterized protein	MNEG_0063	Monoraphidium neglectum							25726181
A0A0D2KCR7	A0A0D2KCR7_9CHLO	unreviewed	DNA excision repair protein ERCC-2 (EC 3.6.1.-)	MNEG_0064	Monoraphidium neglectum		CATALYTIC ACTIVITY: ATP + H(2)O = ADP + phosphate. {ECO:0000256|SAAS:SAAS00566177}.	nucleus [GO:0005634]; ATP binding [GO:0005524]; ATP-dependent DNA helicase activity [GO:0004003]; DNA binding [GO:0003677]; nucleotide-excision repair [GO:0006289]	nucleotide-excision repair [GO:0006289]	ATP binding [GO:0005524]; ATP-dependent DNA helicase activity [GO:0004003]; DNA binding [GO:0003677]	nucleus [GO:0005634]	25726182
A0A0D2LNM9	A0A0D2LNM9_9CHLO	unreviewed	Uncharacterized protein	MNEG_0065	Monoraphidium neglectum			integral component of membrane [GO:0016021]			integral component of membrane [GO:0016021]	25726183
A0A0D2MZM4	A0A0D2MZM4_9CHLO	unreviewed	Uncharacterized protein	MNEG_0066	Monoraphidium neglectum							25726184
A0A0D2NUX0	A0A0D2NUX0_9CHLO	unreviewed	Uncharacterized protein	MNEG_0067	Monoraphidium neglectum							25726185
A0A0D2N6G3	A0A0D2N6G3_9CHLO	unreviewed	Uncharacterized protein	MNEG_0068	Monoraphidium neglectum							25726186
A0A0D2KCS2	A0A0D2KCS2_9CHLO	unreviewed	Tafazzin (EC 2.3.1.-)	MNEG_0069	Monoraphidium neglectum			transferase activity, transferring acyl groups [GO:0016746]; phospholipid metabolic process [GO:0006644]	phospholipid metabolic process [GO:0006644]	transferase activity, transferring acyl groups [GO:0016746]		25726187
A0A0D2LNN3	A0A0D2LNN3_9CHLO	unreviewed	SEC62-subunit of ER-translocon	MNEG_0070	Monoraphidium neglectum			integral component of membrane [GO:0016021]; protein transporter activity [GO:0008565]		protein transporter activity [GO:0008565]	integral component of membrane [GO:0016021]	25726188
A0A0D2MZM7	A0A0D2MZM7_9CHLO	unreviewed	Potassium channel AKT1	MNEG_0071	Monoraphidium neglectum			integral component of membrane [GO:0016021]; ion channel activity [GO:0005216]		ion channel activity [GO:0005216]	integral component of membrane [GO:0016021]	25726189
A0A0D2NUX5	A0A0D2NUX5_9CHLO	unreviewed	SWI/SNF complex subunit SWI3D	MNEG_0072	Monoraphidium neglectum			nucleus [GO:0005634]; DNA binding [GO:0003677]		DNA binding [GO:0003677]	nucleus [GO:0005634]	25726190
A0A0D2N6G6	A0A0D2N6G6_9CHLO	unreviewed	Uncharacterized protein	MNEG_0073	Monoraphidium neglectum							25726191
A0A0D2KCS7	A0A0D2KCS7_9CHLO	unreviewed	Uncharacterized protein	MNEG_0074	Monoraphidium neglectum							25726192
A0A0D2LNN9	A0A0D2LNN9_9CHLO	unreviewed	Uncharacterized protein (Fragment)	MNEG_0075	Monoraphidium neglectum							25726193
A0A0D2MZK9	A0A0D2MZK9_9CHLO	unreviewed	Uncharacterized protein (Fragment)	MNEG_0076	Monoraphidium neglectum			integral component of membrane [GO:0016021]			integral component of membrane [GO:0016021]	25726194
A0A0D2NUU7	A0A0D2NUU7_9CHLO	unreviewed	Nucleoside-diphosphate kinase (EC 2.7.4.6)	MNEG_0077	Monoraphidium neglectum			nucleoside diphosphate kinase activity [GO:0004550]; CTP biosynthetic process [GO:0006241]; GTP biosynthetic process [GO:0006183]; UTP biosynthetic process [GO:0006228]	CTP biosynthetic process [GO:0006241]; GTP biosynthetic process [GO:0006183]; UTP biosynthetic process [GO:0006228]	nucleoside diphosphate kinase activity [GO:0004550]		25726195
A0A0D2N6E7	A0A0D2N6E7_9CHLO	unreviewed	Ammonium transporter	MNEG_0078	Monoraphidium neglectum			integral component of membrane [GO:0016021]; ammonium transmembrane transporter activity [GO:0008519]		ammonium transmembrane transporter activity [GO:0008519]	integral component of membrane [GO:0016021]	25726196
A0A0D2KCQ4	A0A0D2KCQ4_9CHLO	unreviewed	Uncharacterized protein	MNEG_0079	Monoraphidium neglectum							25726197
A0A0D2LNL6	A0A0D2LNL6_9CHLO	unreviewed	ApaG	MNEG_0080	Monoraphidium neglectum							25726198
A0A0D2MZL2	A0A0D2MZL2_9CHLO	unreviewed	Uncharacterized protein	MNEG_0081	Monoraphidium neglectum			RNA binding [GO:0003723]		RNA binding [GO:0003723]		25726199
A0A0D2NUV2	A0A0D2NUV2_9CHLO	unreviewed	DNA replication complex GINS protein SLD5	MNEG_0082	Monoraphidium neglectum			nucleus [GO:0005634]; DNA replication [GO:0006260]	DNA replication [GO:0006260]		nucleus [GO:0005634]	25726200
A0A0D2N6F0	A0A0D2N6F0_9CHLO	unreviewed	Uncharacterized protein	MNEG_0083	Monoraphidium neglectum			N-acetyltransferase activity [GO:0008080]		N-acetyltransferase activity [GO:0008080]		25726201
A0A0D2KCQ8	A0A0D2KCQ8_9CHLO	unreviewed	Putative Sperm-associated antigen 6	MNEG_0084	Monoraphidium neglectum							25726202
A0A0D2LNM2	A0A0D2LNM2_9CHLO	unreviewed	NADH dehydrogenase (EC 1.6.99.3)	MNEG_0085	Monoraphidium neglectum			NADH dehydrogenase activity [GO:0003954]		NADH dehydrogenase activity [GO:0003954]		25726203
A0A0D2MZL7	A0A0D2MZL7_9CHLO	unreviewed	NADH dehydrogenase (EC 1.6.99.3)	MNEG_0086	Monoraphidium neglectum			NADH dehydrogenase activity [GO:0003954]		NADH dehydrogenase activity [GO:0003954]		25726204
A0A0D2NUV6	A0A0D2NUV6_9CHLO	unreviewed	Uncharacterized protein	MNEG_0087	Monoraphidium neglectum							25726205
A0A0D2N6F4	A0A0D2N6F4_9CHLO	unreviewed	Uncharacterized protein	MNEG_0088	Monoraphidium neglectum							25726206
A0A0D2KCR2	A0A0D2KCR2_9CHLO	unreviewed	50S ribosomal protein L17	MNEG_0089	Monoraphidium neglectum			ribosome [GO:0005840]; structural constituent of ribosome [GO:0003735]; translation [GO:0006412]	translation [GO:0006412]	structural constituent of ribosome [GO:0003735]	ribosome [GO:0005840]	25726207
A0A0D2LNM6	A0A0D2LNM6_9CHLO	unreviewed	Uncharacterized protein	MNEG_0090	Monoraphidium neglectum							25726208
A0A0D2MZM1	A0A0D2MZM1_9CHLO	unreviewed	Uncharacterized protein	MNEG_0091	Monoraphidium neglectum							25726209
A0A0D2NUW3	A0A0D2NUW3_9CHLO	unreviewed	Uncharacterized protein	MNEG_0092	Monoraphidium neglectum			integral component of membrane [GO:0016021]; intracellular [GO:0005622]; phosphorus-oxygen lyase activity [GO:0016849]; cyclic nucleotide biosynthetic process [GO:0009190]; intracellular signal transduction [GO:0035556]	cyclic nucleotide biosynthetic process [GO:0009190]; intracellular signal transduction [GO:0035556]	phosphorus-oxygen lyase activity [GO:0016849]	integral component of membrane [GO:0016021]; intracellular [GO:0005622]	25726210
A0A0D2MZJ2	A0A0D2MZJ2_9CHLO	unreviewed	Uncharacterized protein	MNEG_0093	Monoraphidium neglectum			ATP binding [GO:0005524]; ATPase activity [GO:0016887]		ATPase activity [GO:0016887]; ATP binding [GO:0005524]		25726211
A0A0D2NUS5	A0A0D2NUS5_9CHLO	unreviewed	ABC transporter G family protein (EC 3.6.3.44)	MNEG_0094	Monoraphidium neglectum			ATP binding [GO:0005524]; xenobiotic-transporting ATPase activity [GO:0008559]		ATP binding [GO:0005524]; xenobiotic-transporting ATPase activity [GO:0008559]		25726212
A0A0D2N6D3	A0A0D2N6D3_9CHLO	unreviewed	Uncharacterized protein	MNEG_0095	Monoraphidium neglectum			nucleus [GO:0005634]			nucleus [GO:0005634]	25726213
A0A0D2KCM5	A0A0D2KCM5_9CHLO	unreviewed	Uncharacterized protein	MNEG_0096	Monoraphidium neglectum							25726214
A0A0D2LNJ3	A0A0D2LNJ3_9CHLO	unreviewed	Uncharacterized protein	MNEG_0097	Monoraphidium neglectum							25726215
A0A0D2MZJ6	A0A0D2MZJ6_9CHLO	unreviewed	Putative Proteasomal ubiquitin receptor ADRM1 like protein	MNEG_0098	Monoraphidium neglectum			cytoplasm [GO:0005737]; nucleus [GO:0005634]			cytoplasm [GO:0005737]; nucleus [GO:0005634]	25726216
A0A0D2NUS9	A0A0D2NUS9_9CHLO	unreviewed	Uncharacterized protein	MNEG_0099	Monoraphidium neglectum			hydroxyacylglutathione hydrolase activity [GO:0004416]; methylglyoxal catabolic process to D-lactate via S-lactoyl-glutathione [GO:0019243]	methylglyoxal catabolic process to D-lactate via S-lactoyl-glutathione [GO:0019243]	hydroxyacylglutathione hydrolase activity [GO:0004416]		25726217
A0A0D2N6D7	A0A0D2N6D7_9CHLO	unreviewed	Transglutaminase domain protein	MNEG_0100	Monoraphidium neglectum							25726218
A0A0D2KCN1	A0A0D2KCN1_9CHLO	unreviewed	Uncharacterized protein	MNEG_0101	Monoraphidium neglectum							25726219
A0A0D2LNJ8	A0A0D2LNJ8_9CHLO	unreviewed	Uncharacterized protein	MNEG_0102	Monoraphidium neglectum							25726220
A0A0D2MZK0	A0A0D2MZK0_9CHLO	unreviewed	Uncharacterized protein	MNEG_0103	Monoraphidium neglectum							25726221
A0A0D2NUT5	A0A0D2NUT5_9CHLO	unreviewed	Uncharacterized protein	MNEG_0104	Monoraphidium neglectum			integral component of membrane [GO:0016021]; ATP binding [GO:0005524]; ATPase activity, coupled to transmembrane movement of substances [GO:0042626]		ATPase activity, coupled to transmembrane movement of substances [GO:0042626]; ATP binding [GO:0005524]	integral component of membrane [GO:0016021]	25726222
A0A0D2N6E0	A0A0D2N6E0_9CHLO	unreviewed	Uncharacterized protein	MNEG_0105	Monoraphidium neglectum			integral component of membrane [GO:0016021]; ATP binding [GO:0005524]; ATPase activity [GO:0016887]		ATPase activity [GO:0016887]; ATP binding [GO:0005524]	integral component of membrane [GO:0016021]	25726223
A0A0D2KCP0	A0A0D2KCP0_9CHLO	unreviewed	Uncharacterized protein	MNEG_0106	Monoraphidium neglectum							25726224
A0A0D2LNK6	A0A0D2LNK6_9CHLO	unreviewed	Uncharacterized protein	MNEG_0107	Monoraphidium neglectum			integral component of membrane [GO:0016021]			integral component of membrane [GO:0016021]	25726225
A0A0D2MZK6	A0A0D2MZK6_9CHLO	unreviewed	Uncharacterized protein	MNEG_0108	Monoraphidium neglectum							25726226
A0A0D2NUU1	A0A0D2NUU1_9CHLO	unreviewed	Uncharacterized protein	MNEG_0109	Monoraphidium neglectum							25726227
A0A0D2N6E4	A0A0D2N6E4_9CHLO	unreviewed	Uncharacterized protein	MNEG_0110	Monoraphidium neglectum							25726228
A0A0D2KCQ0	A0A0D2KCQ0_9CHLO	unreviewed	Putative uncharacterized hydrolase (EC 3.-.-.-)	MNEG_0111	Monoraphidium neglectum			hydrolase activity [GO:0016787]; metabolic process [GO:0008152]	metabolic process [GO:0008152]	hydrolase activity [GO:0016787]		25726229
A0A0D2LNL1	A0A0D2LNL1_9CHLO	unreviewed	Uncharacterized protein (Fragment)	MNEG_0112	Monoraphidium neglectum							25726230
A0A0D2KCK4	A0A0D2KCK4_9CHLO	unreviewed	Uncharacterized protein	MNEG_0113	Monoraphidium neglectum							25726231
A0A0D2LNH3	A0A0D2LNH3_9CHLO	unreviewed	Uncharacterized protein	MNEG_0114	Monoraphidium neglectum							25726232
A0A0D2MZH9	A0A0D2MZH9_9CHLO	unreviewed	Uncharacterized protein	MNEG_0115	Monoraphidium neglectum							25726233
A0A0D2NUQ7	A0A0D2NUQ7_9CHLO	unreviewed	Dolichyl-diphosphooligosaccharide--protein glycosyltransferase 48 kDa subunit (Oligosaccharyl transferase 48 kDa subunit) (EC 2.4.99.18)	MNEG_0116	Monoraphidium neglectum	PATHWAY: Protein modification; protein glycosylation. {ECO:0000256|RuleBase:RU361142}.	CATALYTIC ACTIVITY: Dolichyl diphosphooligosaccharide + [protein]-L-asparagine = dolichyl diphosphate + a glycoprotein with the oligosaccharide chain attached by N-beta-D-glycosyl linkage to a protein L-asparagine. {ECO:0000256|RuleBase:RU361142}.	endoplasmic reticulum membrane [GO:0005789]; integral component of membrane [GO:0016021]; transferase activity, transferring glycosyl groups [GO:0016757]; protein N-linked glycosylation via asparagine [GO:0018279]	protein N-linked glycosylation via asparagine [GO:0018279]	transferase activity, transferring glycosyl groups [GO:0016757]	endoplasmic reticulum membrane [GO:0005789]; integral component of membrane [GO:0016021]	25726234
A0A0D2N6B7	A0A0D2N6B7_9CHLO	unreviewed	Iron hydrogenase (EC 1.6.5.3)	MNEG_0117	Monoraphidium neglectum			NADH dehydrogenase (ubiquinone) activity [GO:0008137]		NADH dehydrogenase (ubiquinone) activity [GO:0008137]		25726235
A0A0D2KCK9	A0A0D2KCK9_9CHLO	unreviewed	Uncharacterized protein	MNEG_0118	Monoraphidium neglectum			RNA binding [GO:0003723]		RNA binding [GO:0003723]		25726236
A0A0D2LNH8	A0A0D2LNH8_9CHLO	unreviewed	Deflagellation-inducible protein	MNEG_0119	Monoraphidium neglectum			motile cilium [GO:0031514]			motile cilium [GO:0031514]	25726237
A0A0D2MZI4	A0A0D2MZI4_9CHLO	unreviewed	Uncharacterized protein	MNEG_0120	Monoraphidium neglectum							25726238
A0A0D2NUR3	A0A0D2NUR3_9CHLO	unreviewed	Lipoxygenase homology domain-containing protein 1	MNEG_0121	Monoraphidium neglectum							25726239
A0A0D2N6C2	A0A0D2N6C2_9CHLO	unreviewed	Protochlorophyllide reductase (EC 1.3.1.33)	MNEG_0122	Monoraphidium neglectum			protochlorophyllide reductase activity [GO:0016630]		protochlorophyllide reductase activity [GO:0016630]		25726240
A0A0D2KCL3	A0A0D2KCL3_9CHLO	unreviewed	Uncharacterized protein	MNEG_0123	Monoraphidium neglectum			small ribosomal subunit [GO:0015935]; structural constituent of ribosome [GO:0003735]; translation [GO:0006412]	translation [GO:0006412]	structural constituent of ribosome [GO:0003735]	small ribosomal subunit [GO:0015935]	25726241
A0A0D2LNI3	A0A0D2LNI3_9CHLO	unreviewed	Short-chain dehydrogenase/reductase SDR (EC 1.1.1.100)	MNEG_0124	Monoraphidium neglectum			3-oxo-glutaryl-[acp] methyl ester reductase activity [GO:0102131]; 3-oxo-pimeloyl-[acp] methyl ester reductase activity [GO:0102132]; 3-oxoacyl-[acyl-carrier-protein] reductase (NADPH) activity [GO:0004316]		3-oxoacyl-[acyl-carrier-protein] reductase (NADPH) activity [GO:0004316]; 3-oxo-glutaryl-[acp] methyl ester reductase activity [GO:0102131]; 3-oxo-pimeloyl-[acp] methyl ester reductase activity [GO:0102132]		25726242
A0A0D2MZI9	A0A0D2MZI9_9CHLO	unreviewed	Putative E3 ubiquitin-protein ligase ARI2 (EC 6.3.2.-)	MNEG_0125	Monoraphidium neglectum		CATALYTIC ACTIVITY: S-ubiquitinyl-[E2 ubiquitin-conjugating enzyme]-L-cysteine + [acceptor protein]-L-lysine = [E2 ubiquitin-conjugating enzyme]-L-cysteine + N(6)-ubiquitinyl-[acceptor protein]-L-lysine. {ECO:0000256|SAAS:SAAS00692260}.	ligase activity [GO:0016874]; metal ion binding [GO:0046872]; ubiquitin-protein transferase activity [GO:0004842]		ligase activity [GO:0016874]; metal ion binding [GO:0046872]; ubiquitin-protein transferase activity [GO:0004842]		25726243
A0A0D2NUR8	A0A0D2NUR8_9CHLO	unreviewed	Uncharacterized protein	MNEG_0126	Monoraphidium neglectum			ATP-binding cassette (ABC) transporter complex [GO:0043190]; transport [GO:0006810]	transport [GO:0006810]		ATP-binding cassette (ABC) transporter complex [GO:0043190]	25726244
A0A0D2N6C6	A0A0D2N6C6_9CHLO	unreviewed	UTP--glucose-1-phosphateuridylyltransferase (EC 2.7.7.9)	MNEG_0127	Monoraphidium neglectum			UTP:glucose-1-phosphate uridylyltransferase activity [GO:0003983]; UDP-glucose metabolic process [GO:0006011]	UDP-glucose metabolic process [GO:0006011]	UTP:glucose-1-phosphate uridylyltransferase activity [GO:0003983]		25726245
A0A0D2KCM0	A0A0D2KCM0_9CHLO	unreviewed	Prohibitin-2	MNEG_0128	Monoraphidium neglectum			membrane [GO:0016020]			membrane [GO:0016020]	25726246
A0A0D2LNI9	A0A0D2LNI9_9CHLO	unreviewed	Uncharacterized protein	MNEG_0129	Monoraphidium neglectum			protein serine/threonine phosphatase activity [GO:0004722]		protein serine/threonine phosphatase activity [GO:0004722]		25726247
A0A0D2NUN5	A0A0D2NUN5_9CHLO	unreviewed	Uncharacterized protein (Fragment)	MNEG_0130	Monoraphidium neglectum							25726248
A0A0D2N699	A0A0D2N699_9CHLO	unreviewed	WNK lysine deficient protein kinase (EC 2.7.11.1)	MNEG_0131	Monoraphidium neglectum			ATP binding [GO:0005524]; protein kinase activity [GO:0004672]		ATP binding [GO:0005524]; protein kinase activity [GO:0004672]		25726249
A0A0D2KCJ2	A0A0D2KCJ2_9CHLO	unreviewed	Uncharacterized protein	MNEG_0132	Monoraphidium neglectum			ATP binding [GO:0005524]; protein kinase activity [GO:0004672]		ATP binding [GO:0005524]; protein kinase activity [GO:0004672]		25726250
A0A0D2LNG0	A0A0D2LNG0_9CHLO	unreviewed	Sugar transport protein 10	MNEG_0133	Monoraphidium neglectum			integral component of membrane [GO:0016021]; substrate-specific transmembrane transporter activity [GO:0022891]; carbohydrate transport [GO:0008643]	carbohydrate transport [GO:0008643]	substrate-specific transmembrane transporter activity [GO:0022891]	integral component of membrane [GO:0016021]	25726251
A0A0D2MZG1	A0A0D2MZG1_9CHLO	unreviewed	Uncharacterized protein	MNEG_0134	Monoraphidium neglectum			integral component of membrane [GO:0016021]; phospho-N-acetylmuramoyl-pentapeptide-transferase activity [GO:0008963]; UDP-N-acetylglucosamine-dolichyl-phosphate N-acetylglucosaminephosphotransferase activity [GO:0003975]; dolichol-linked oligosaccharide biosynthetic process [GO:0006488]; protein N-linked glycosylation [GO:0006487]	dolichol-linked oligosaccharide biosynthetic process [GO:0006488]; protein N-linked glycosylation [GO:0006487]	phospho-N-acetylmuramoyl-pentapeptide-transferase activity [GO:0008963]; UDP-N-acetylglucosamine-dolichyl-phosphate N-acetylglucosaminephosphotransferase activity [GO:0003975]	integral component of membrane [GO:0016021]	25726252
A0A0D2NUP1	A0A0D2NUP1_9CHLO	unreviewed	Uncharacterized protein	MNEG_0135	Monoraphidium neglectum			calcium ion binding [GO:0005509]		calcium ion binding [GO:0005509]		25726253
A0A0D2N6A3	A0A0D2N6A3_9CHLO	unreviewed	Syntaxin-51	MNEG_0136	Monoraphidium neglectum			integral component of membrane [GO:0016021]			integral component of membrane [GO:0016021]	25726254
A0A0D2KCJ5	A0A0D2KCJ5_9CHLO	unreviewed	Pre-mRNA-splicing factor SPF27	MNEG_0137	Monoraphidium neglectum			mRNA processing [GO:0006397]	mRNA processing [GO:0006397]			25726255
A0A0D2LNG5	A0A0D2LNG5_9CHLO	unreviewed	Phytanoyl-CoA dioxygenase	MNEG_0138	Monoraphidium neglectum			dioxygenase activity [GO:0051213]		dioxygenase activity [GO:0051213]		25726256
A0A0D2MZG9	A0A0D2MZG9_9CHLO	unreviewed	Anthranilate synthase component II (EC 4.1.3.27)	MNEG_0139	Monoraphidium neglectum			anthranilate synthase activity [GO:0004049]; metabolic process [GO:0008152]	metabolic process [GO:0008152]	anthranilate synthase activity [GO:0004049]		25726257
A0A0D2NUP6	A0A0D2NUP6_9CHLO	unreviewed	Probable acetate kinase (EC 2.7.2.1) (Acetokinase)	MNEG_0140	Monoraphidium neglectum	PATHWAY: Metabolic intermediate biosynthesis; acetyl-CoA biosynthesis; acetyl-CoA from acetate: step 1/2. {ECO:0000256|HAMAP-Rule:MF_03131}.	CATALYTIC ACTIVITY: ATP + acetate = ADP + acetyl phosphate. {ECO:0000256|HAMAP-Rule:MF_03131}.	intracellular [GO:0005622]; acetate kinase activity [GO:0008776]; ATP binding [GO:0005524]; magnesium ion binding [GO:0000287]; acetyl-CoA biosynthetic process [GO:0006085]; organic acid metabolic process [GO:0006082]	acetyl-CoA biosynthetic process [GO:0006085]; organic acid metabolic process [GO:0006082]	acetate kinase activity [GO:0008776]; ATP binding [GO:0005524]; magnesium ion binding [GO:0000287]	intracellular [GO:0005622]	25726258
A0A0D2N6A7	A0A0D2N6A7_9CHLO	unreviewed	Bromodomain-containing protein 9	MNEG_0141	Monoraphidium neglectum							25726259
A0A0D2KCJ8	A0A0D2KCJ8_9CHLO	unreviewed	Coiled-coil domain-containing protein 40	MNEG_0142	Monoraphidium neglectum							25726260
A0A0D2LNG9	A0A0D2LNG9_9CHLO	unreviewed	Uncharacterized protein	MNEG_0143	Monoraphidium neglectum							25726261
A0A0D2MZH6	A0A0D2MZH6_9CHLO	unreviewed	Uncharacterized protein	MNEG_0144	Monoraphidium neglectum							25726262
A0A0D2NUQ3	A0A0D2NUQ3_9CHLO	unreviewed	Uncharacterized protein	MNEG_0145	Monoraphidium neglectum			ATP binding [GO:0005524]; microtubule binding [GO:0008017]; microtubule motor activity [GO:0003777]; microtubule-based movement [GO:0007018]	microtubule-based movement [GO:0007018]	ATP binding [GO:0005524]; microtubule binding [GO:0008017]; microtubule motor activity [GO:0003777]		25726263
A0A0D2N6B2	A0A0D2N6B2_9CHLO	unreviewed	Uncharacterized protein	MNEG_0146	Monoraphidium neglectum							25726264
A0A0D2LNE2	A0A0D2LNE2_9CHLO	unreviewed	Uncharacterized protein	MNEG_0147	Monoraphidium neglectum			catalytic activity [GO:0003824]		catalytic activity [GO:0003824]		25726265
A0A0D2MZE6	A0A0D2MZE6_9CHLO	unreviewed	Uncharacterized protein	MNEG_0148	Monoraphidium neglectum							25726266
A0A0D2NUM0	A0A0D2NUM0_9CHLO	unreviewed	Uncharacterized protein	MNEG_0149	Monoraphidium neglectum							25726267
A0A0D2N685	A0A0D2N685_9CHLO	unreviewed	Uncharacterized protein	MNEG_0150	Monoraphidium neglectum							25726268
A0A0D2KCI4	A0A0D2KCI4_9CHLO	unreviewed	Uncharacterized protein	MNEG_0151	Monoraphidium neglectum			catalytic activity [GO:0003824]; metabolic process [GO:0008152]	metabolic process [GO:0008152]	catalytic activity [GO:0003824]		25726269
A0A0D2LNE6	A0A0D2LNE6_9CHLO	unreviewed	Uncharacterized protein	MNEG_0152	Monoraphidium neglectum			integral component of membrane [GO:0016021]			integral component of membrane [GO:0016021]	25726270
A0A0D2MZF0	A0A0D2MZF0_9CHLO	unreviewed	Uncharacterized protein	MNEG_0153	Monoraphidium neglectum			hydrolase activity, hydrolyzing O-glycosyl compounds [GO:0004553]; carbohydrate metabolic process [GO:0005975]	carbohydrate metabolic process [GO:0005975]	hydrolase activity, hydrolyzing O-glycosyl compounds [GO:0004553]		25726271
A0A0D2NUM5	A0A0D2NUM5_9CHLO	unreviewed	Uncharacterized protein	MNEG_0154	Monoraphidium neglectum							25726272
A0A0D2N689	A0A0D2N689_9CHLO	unreviewed	Putative transporter	MNEG_0155	Monoraphidium neglectum			integral component of membrane [GO:0016021]; transmembrane transport [GO:0055085]	transmembrane transport [GO:0055085]		integral component of membrane [GO:0016021]	25726273
A0A0D2KCI7	A0A0D2KCI7_9CHLO	unreviewed	Uncharacterized protein	MNEG_0156	Monoraphidium neglectum			integral component of membrane [GO:0016021]			integral component of membrane [GO:0016021]	25726274
A0A0D2LNF1	A0A0D2LNF1_9CHLO	unreviewed	Uncharacterized protein	MNEG_0157	Monoraphidium neglectum							25726275
A0A0D2MZF5	A0A0D2MZF5_9CHLO	unreviewed	Uncharacterized protein	MNEG_0158	Monoraphidium neglectum							25726276
A0A0D2NUN1	A0A0D2NUN1_9CHLO	unreviewed	Uncharacterized protein	MNEG_0159	Monoraphidium neglectum			integral component of membrane [GO:0016021]; substrate-specific transmembrane transporter activity [GO:0022891]		substrate-specific transmembrane transporter activity [GO:0022891]	integral component of membrane [GO:0016021]	25726277
A0A0D2N694	A0A0D2N694_9CHLO	unreviewed	Ribosomal RNA large subunit methyltransferase N (EC 2.1.1.-)	MNEG_0160	Monoraphidium neglectum			cytoplasm [GO:0005737]; iron-sulfur cluster binding [GO:0051536]; RNA methyltransferase activity [GO:0008173]; rRNA base methylation [GO:0070475]; tRNA methylation [GO:0030488]	rRNA base methylation [GO:0070475]; tRNA methylation [GO:0030488]	iron-sulfur cluster binding [GO:0051536]; RNA methyltransferase activity [GO:0008173]	cytoplasm [GO:0005737]	25726278
A0A0D2KCI8	A0A0D2KCI8_9CHLO	unreviewed	Uncharacterized protein	MNEG_0161	Monoraphidium neglectum			protein serine/threonine phosphatase activity [GO:0004722]		protein serine/threonine phosphatase activity [GO:0004722]		25726279
A0A0D2LNF6	A0A0D2LNF6_9CHLO	unreviewed	Uncharacterized protein	MNEG_0162	Monoraphidium neglectum							25726280
A0A0D2MZF9	A0A0D2MZF9_9CHLO	unreviewed	Uncharacterized protein	MNEG_0163	Monoraphidium neglectum							25726281
A0A0D2LND0	A0A0D2LND0_9CHLO	unreviewed	Uncharacterized protein	MNEG_0164	Monoraphidium neglectum							25726282
A0A0D2MZD1	A0A0D2MZD1_9CHLO	unreviewed	Uncharacterized protein	MNEG_0165	Monoraphidium neglectum			nucleus [GO:0005634]; DNA replication [GO:0006260]	DNA replication [GO:0006260]		nucleus [GO:0005634]	25726283
A0A0D2NUK5	A0A0D2NUK5_9CHLO	unreviewed	Uncharacterized protein	MNEG_0166	Monoraphidium neglectum							25726284
A0A0D2N671	A0A0D2N671_9CHLO	unreviewed	Uncharacterized protein	MNEG_0167	Monoraphidium neglectum							25726285
A0A0D2KCH5	A0A0D2KCH5_9CHLO	unreviewed	Replication protein A DNA-binding subunit	MNEG_0168	Monoraphidium neglectum			nucleus [GO:0005634]; DNA binding [GO:0003677]; DNA replication [GO:0006260]	DNA replication [GO:0006260]	DNA binding [GO:0003677]	nucleus [GO:0005634]	25726286
A0A0D2LND5	A0A0D2LND5_9CHLO	unreviewed	Uncharacterized protein	MNEG_0169	Monoraphidium neglectum							25726287
A0A0D2MZD6	A0A0D2MZD6_9CHLO	unreviewed	ABC transporter G family protein	MNEG_0170	Monoraphidium neglectum			integral component of membrane [GO:0016021]; ATP binding [GO:0005524]; ATPase activity [GO:0016887]		ATPase activity [GO:0016887]; ATP binding [GO:0005524]	integral component of membrane [GO:0016021]	25726288
A0A0D2NUL0	A0A0D2NUL0_9CHLO	unreviewed	Uncharacterized protein	MNEG_0171	Monoraphidium neglectum			integral component of membrane [GO:0016021]			integral component of membrane [GO:0016021]	25726289
A0A0D2N675	A0A0D2N675_9CHLO	unreviewed	Uncharacterized protein	MNEG_0172	Monoraphidium neglectum							25726290
A0A0D2KCH8	A0A0D2KCH8_9CHLO	unreviewed	Uncharacterized protein	MNEG_0173	Monoraphidium neglectum			integral component of membrane [GO:0016021]			integral component of membrane [GO:0016021]	25726291
A0A0D2LND9	A0A0D2LND9_9CHLO	unreviewed	Uncharacterized protein	MNEG_0174	Monoraphidium neglectum							25726292
A0A0D2MZE1	A0A0D2MZE1_9CHLO	unreviewed	Uncharacterized protein	MNEG_0175	Monoraphidium neglectum			integral component of membrane [GO:0016021]			integral component of membrane [GO:0016021]	25726293
A0A0D2NUL5	A0A0D2NUL5_9CHLO	unreviewed	Uncharacterized protein	MNEG_0176	Monoraphidium neglectum							25726294
A0A0D2N679	A0A0D2N679_9CHLO	unreviewed	Uncharacterized protein	MNEG_0177	Monoraphidium neglectum			integral component of membrane [GO:0016021]			integral component of membrane [GO:0016021]	25726295
A0A0D2KCI0	A0A0D2KCI0_9CHLO	unreviewed	Uncharacterized protein	MNEG_0178	Monoraphidium neglectum							25726296
A0A0D2MZC1	A0A0D2MZC1_9CHLO	unreviewed	Uncharacterized protein (Fragment)	MNEG_0179	Monoraphidium neglectum			cytoplasm [GO:0005737]; arginine-tRNA ligase activity [GO:0004814]; ATP binding [GO:0005524]; arginyl-tRNA aminoacylation [GO:0006420]	arginyl-tRNA aminoacylation [GO:0006420]	arginine-tRNA ligase activity [GO:0004814]; ATP binding [GO:0005524]	cytoplasm [GO:0005737]	25726297
A0A0D2NUI7	A0A0D2NUI7_9CHLO	unreviewed	Neural cell expressed, developmentally down-regulated 4 (EC 6.3.2.19)	MNEG_0180	Monoraphidium neglectum		CATALYTIC ACTIVITY: S-ubiquitinyl-[E2 ubiquitin-conjugating enzyme]-L-cysteine + [acceptor protein]-L-lysine = [E2 ubiquitin-conjugating enzyme]-L-cysteine + N(6)-ubiquitinyl-[acceptor protein]-L-lysine. {ECO:0000256|SAAS:SAAS00628607}.	ligase activity [GO:0016874]; ubiquitin-protein transferase activity [GO:0004842]		ligase activity [GO:0016874]; ubiquitin-protein transferase activity [GO:0004842]		25726298
A0A0D2N657	A0A0D2N657_9CHLO	unreviewed	Uncharacterized protein	MNEG_0181	Monoraphidium neglectum							25726299
A0A0D2KCG8	A0A0D2KCG8_9CHLO	unreviewed	Dehydrogenase/reductase (EC 1.-.-.-)	MNEG_0182	Monoraphidium neglectum			oxidoreductase activity [GO:0016491]		oxidoreductase activity [GO:0016491]		25726300
A0A0D2LNC2	A0A0D2LNC2_9CHLO	unreviewed	Uncharacterized protein	MNEG_0183	Monoraphidium neglectum							25726301
A0A0D2MZC4	A0A0D2MZC4_9CHLO	unreviewed	Uncharacterized protein	MNEG_0184	Monoraphidium neglectum			N-acetyltransferase activity [GO:0008080]		N-acetyltransferase activity [GO:0008080]		25726302
A0A0D2NUJ3	A0A0D2NUJ3_9CHLO	unreviewed	Putative MutL protein	MNEG_0185	Monoraphidium neglectum			ATP binding [GO:0005524]; mismatched DNA binding [GO:0030983]; mismatch repair [GO:0006298]	mismatch repair [GO:0006298]	ATP binding [GO:0005524]; mismatched DNA binding [GO:0030983]		25726303
A0A0D2N663	A0A0D2N663_9CHLO	unreviewed	Uncharacterized protein	MNEG_0186	Monoraphidium neglectum			cellular response to phosphate starvation [GO:0016036]	cellular response to phosphate starvation [GO:0016036]			25726304
A0A0D2KCH0	A0A0D2KCH0_9CHLO	unreviewed	Methylenetetrahydrofolate reductase (EC 1.5.1.20)	MNEG_0187	Monoraphidium neglectum	PATHWAY: One-carbon metabolism; tetrahydrofolate interconversion. {ECO:0000256|RuleBase:RU003862}.	CATALYTIC ACTIVITY: 5-methyltetrahydrofolate + NAD(P)(+) = 5,10-methylenetetrahydrofolate + NAD(P)H. {ECO:0000256|RuleBase:RU003862}.	methylenetetrahydrofolate reductase (NAD(P)H) activity [GO:0004489]; methionine metabolic process [GO:0006555]; tetrahydrofolate interconversion [GO:0035999]	methionine metabolic process [GO:0006555]; tetrahydrofolate interconversion [GO:0035999]	methylenetetrahydrofolate reductase (NAD(P)H) activity [GO:0004489]		25726305
A0A0D2LNC7	A0A0D2LNC7_9CHLO	unreviewed	Chorismate synthase (EC 4.2.3.5)	MNEG_0188	Monoraphidium neglectum	PATHWAY: Metabolic intermediate biosynthesis; chorismate biosynthesis; chorismate from D-erythrose 4-phosphate and phosphoenolpyruvate: step 7/7. {ECO:0000256|RuleBase:RU000605}.	CATALYTIC ACTIVITY: 5-O-(1-carboxyvinyl)-3-phosphoshikimate = chorismate + phosphate. {ECO:0000256|RuleBase:RU000605}.	chorismate synthase activity [GO:0004107]; aromatic amino acid family biosynthetic process [GO:0009073]; chorismate biosynthetic process [GO:0009423]	aromatic amino acid family biosynthetic process [GO:0009073]; chorismate biosynthetic process [GO:0009423]	chorismate synthase activity [GO:0004107]		25726306
A0A0D2MZC7	A0A0D2MZC7_9CHLO	unreviewed	U4/U6.U5 tri-snRNP-associated protein 1	MNEG_0189	Monoraphidium neglectum			cytoplasm [GO:0005737]; ATP binding [GO:0005524]; mRNA splicing, via spliceosome [GO:0000398]; protein folding [GO:0006457]	mRNA splicing, via spliceosome [GO:0000398]; protein folding [GO:0006457]	ATP binding [GO:0005524]	cytoplasm [GO:0005737]	25726307
A0A0D2NUJ9	A0A0D2NUJ9_9CHLO	unreviewed	Ribosome-recycling factor	MNEG_0190	Monoraphidium neglectum			translation [GO:0006412]	translation [GO:0006412]			25726308
A0A0D2N666	A0A0D2N666_9CHLO	unreviewed	Uncharacterized protein	MNEG_0191	Monoraphidium neglectum							25726309
A0A0D2KCH4	A0A0D2KCH4_9CHLO	unreviewed	Uncharacterized protein (Fragment)	MNEG_0192	Monoraphidium neglectum							25726310
A0A0D2KCF8	A0A0D2KCF8_9CHLO	unreviewed	Uncharacterized protein (Fragment)	MNEG_0193	Monoraphidium neglectum							25726311
A0A0D2LNA7	A0A0D2LNA7_9CHLO	unreviewed	Uncharacterized protein	MNEG_0194	Monoraphidium neglectum							25726312
A0A0D2MZB3	A0A0D2MZB3_9CHLO	unreviewed	Uncharacterized protein	MNEG_0195	Monoraphidium neglectum			cysteine-type peptidase activity [GO:0008234]		cysteine-type peptidase activity [GO:0008234]		25726313
A0A0D2NUH8	A0A0D2NUH8_9CHLO	unreviewed	Uncharacterized protein	MNEG_0196	Monoraphidium neglectum			oxidoreductase activity [GO:0016491]; zinc ion binding [GO:0008270]		oxidoreductase activity [GO:0016491]; zinc ion binding [GO:0008270]		25726314
A0A0D2N649	A0A0D2N649_9CHLO	unreviewed	Uncharacterized protein	MNEG_0197	Monoraphidium neglectum							25726315
A0A0D2KCG3	A0A0D2KCG3_9CHLO	unreviewed	Uncharacterized protein	MNEG_0198	Monoraphidium neglectum							25726316
A0A0D2LNB3	A0A0D2LNB3_9CHLO	unreviewed	Uncharacterized protein	MNEG_0199	Monoraphidium neglectum							25726317
A0A0D2MZB7	A0A0D2MZB7_9CHLO	unreviewed	Uncharacterized protein	MNEG_0200	Monoraphidium neglectum			tRNA-specific adenosine deaminase activity [GO:0008251]; zinc ion binding [GO:0008270]; tRNA wobble adenosine to inosine editing [GO:0002100]	tRNA wobble adenosine to inosine editing [GO:0002100]	tRNA-specific adenosine deaminase activity [GO:0008251]; zinc ion binding [GO:0008270]		25726318
A0A0D2NUI3	A0A0D2NUI3_9CHLO	unreviewed	Uncharacterized protein	MNEG_0201	Monoraphidium neglectum			hydrolase activity [GO:0016787]		hydrolase activity [GO:0016787]		25726319
A0A0D2N651	A0A0D2N651_9CHLO	unreviewed	ATP-dependent Clp protease proteolytic subunit	MNEG_0202	Monoraphidium neglectum			serine-type endopeptidase activity [GO:0004252]		serine-type endopeptidase activity [GO:0004252]		25726320
A0A0D2KCG5	A0A0D2KCG5_9CHLO	unreviewed	Uncharacterized protein	MNEG_0203	Monoraphidium neglectum			integral component of membrane [GO:0016021]			integral component of membrane [GO:0016021]	25726321
A0A0D2LNB6	A0A0D2LNB6_9CHLO	unreviewed	Uncharacterized protein	MNEG_0204	Monoraphidium neglectum							25726322
A0A0D2NUG7	A0A0D2NUG7_9CHLO	unreviewed	Uncharacterized protein	MNEG_0205	Monoraphidium neglectum			protein serine/threonine phosphatase activity [GO:0004722]		protein serine/threonine phosphatase activity [GO:0004722]		25726323
A0A0D2N643	A0A0D2N643_9CHLO	unreviewed	Uncharacterized protein	MNEG_0206	Monoraphidium neglectum			signal recognition particle, endoplasmic reticulum targeting [GO:0005786]; 7S RNA binding [GO:0008312]; endoplasmic reticulum signal peptide binding [GO:0030942]; SRP-dependent cotranslational protein targeting to membrane [GO:0006614]	SRP-dependent cotranslational protein targeting to membrane [GO:0006614]	7S RNA binding [GO:0008312]; endoplasmic reticulum signal peptide binding [GO:0030942]	signal recognition particle, endoplasmic reticulum targeting [GO:0005786]	25726324
A0A0D2KCF0	A0A0D2KCF0_9CHLO	unreviewed	Adenosine 5'-phosphatase (EC 3.1.3.5)	MNEG_0207	Monoraphidium neglectum			5'-nucleotidase activity [GO:0008253]; metal ion binding [GO:0046872]; nucleotide binding [GO:0000166]; nucleotide catabolic process [GO:0009166]	nucleotide catabolic process [GO:0009166]	5'-nucleotidase activity [GO:0008253]; metal ion binding [GO:0046872]; nucleotide binding [GO:0000166]		25726325
A0A0D2LN97	A0A0D2LN97_9CHLO	unreviewed	Uncharacterized protein	MNEG_0208	Monoraphidium neglectum			nucleus [GO:0005634]			nucleus [GO:0005634]	25726326
A0A0D2MZA7	A0A0D2MZA7_9CHLO	unreviewed	Uncharacterized protein	MNEG_0209	Monoraphidium neglectum			integral component of membrane [GO:0016021]; ATP binding [GO:0005524]; ATPase activity [GO:0016887]; transporter activity [GO:0005215]		ATPase activity [GO:0016887]; ATP binding [GO:0005524]; transporter activity [GO:0005215]	integral component of membrane [GO:0016021]	25726327
A0A0D2NUH0	A0A0D2NUH0_9CHLO	unreviewed	3-ketoacyl-CoA synthase (EC 2.3.1.-)	MNEG_0210	Monoraphidium neglectum	PATHWAY: Lipid metabolism; fatty acid biosynthesis. {ECO:0000256|PIRNR:PIRNR036417}.		integral component of membrane [GO:0016021]; transferase activity, transferring acyl groups other than amino-acyl groups [GO:0016747]; fatty acid biosynthetic process [GO:0006633]	fatty acid biosynthetic process [GO:0006633]	transferase activity, transferring acyl groups other than amino-acyl groups [GO:0016747]	integral component of membrane [GO:0016021]	25726328
A0A0D2N645	A0A0D2N645_9CHLO	unreviewed	Uncharacterized protein	MNEG_0211	Monoraphidium neglectum			integral component of membrane [GO:0016021]; heme binding [GO:0020037]; iron ion binding [GO:0005506]; monooxygenase activity [GO:0004497]; oxidoreductase activity, acting on paired donors, with incorporation or reduction of molecular oxygen [GO:0016705]		heme binding [GO:0020037]; iron ion binding [GO:0005506]; monooxygenase activity [GO:0004497]; oxidoreductase activity, acting on paired donors, with incorporation or reduction of molecular oxygen [GO:0016705]	integral component of membrane [GO:0016021]	25726329
A0A0D2KCF4	A0A0D2KCF4_9CHLO	unreviewed	Uncharacterized protein	MNEG_0212	Monoraphidium neglectum			microtubule binding [GO:0008017]; cytokinesis [GO:0000910]; microtubule cytoskeleton organization [GO:0000226]	cytokinesis [GO:0000910]; microtubule cytoskeleton organization [GO:0000226]	microtubule binding [GO:0008017]		25726330
A0A0D2LNA3	A0A0D2LNA3_9CHLO	unreviewed	Uncharacterized protein	MNEG_0213	Monoraphidium neglectum			integral component of membrane [GO:0016021]			integral component of membrane [GO:0016021]	25726331
A0A0D2MZB1	A0A0D2MZB1_9CHLO	unreviewed	Uncharacterized protein	MNEG_0214	Monoraphidium neglectum			ubiquitin-dependent protein catabolic process [GO:0006511]	ubiquitin-dependent protein catabolic process [GO:0006511]			25726332
A0A0D2NUH4	A0A0D2NUH4_9CHLO	unreviewed	Dephospho-CoA kinase (EC 2.7.1.24)	MNEG_0215	Monoraphidium neglectum			integral component of membrane [GO:0016021]; ATP binding [GO:0005524]; dephospho-CoA kinase activity [GO:0004140]; coenzyme A biosynthetic process [GO:0015937]	coenzyme A biosynthetic process [GO:0015937]	ATP binding [GO:0005524]; dephospho-CoA kinase activity [GO:0004140]	integral component of membrane [GO:0016021]	25726333
A0A0D2N647	A0A0D2N647_9CHLO	unreviewed	Putative ATP-dependent RNA helicase DDX60 (EC 3.6.1.-)	MNEG_0216	Monoraphidium neglectum			ATP binding [GO:0005524]; helicase activity [GO:0004386]; nucleic acid binding [GO:0003676]		ATP binding [GO:0005524]; helicase activity [GO:0004386]; nucleic acid binding [GO:0003676]		25726334
A0A0D2KCD5	A0A0D2KCD5_9CHLO	unreviewed	Uncharacterized protein	MNEG_0217	Monoraphidium neglectum							25726335
A0A0D2LN81	A0A0D2LN81_9CHLO	unreviewed	F-box protein	MNEG_0218	Monoraphidium neglectum							25726336
A0A0D2MZ91	A0A0D2MZ91_9CHLO	unreviewed	Uncharacterized protein	MNEG_0219	Monoraphidium neglectum			integral component of membrane [GO:0016021]			integral component of membrane [GO:0016021]	25726337
A0A0D2NUF7	A0A0D2NUF7_9CHLO	unreviewed	Uncharacterized protein	MNEG_0220	Monoraphidium neglectum			integral component of membrane [GO:0016021]			integral component of membrane [GO:0016021]	25726338
A0A0D2N631	A0A0D2N631_9CHLO	unreviewed	Uncharacterized protein	MNEG_0221	Monoraphidium neglectum							25726339
A0A0D2KCD9	A0A0D2KCD9_9CHLO	unreviewed	Inhibitor of growth protein 3	MNEG_0222	Monoraphidium neglectum							25726340
A0A0D2LN86	A0A0D2LN86_9CHLO	unreviewed	Uncharacterized protein	MNEG_0223	Monoraphidium neglectum			BLOC-1 complex [GO:0031083]			BLOC-1 complex [GO:0031083]	25726341
A0A0D2MZ95	A0A0D2MZ95_9CHLO	unreviewed	Tubulin-specific chaperone A	MNEG_0224	Monoraphidium neglectum			cytoplasm [GO:0005737]; microtubule [GO:0005874]; beta-tubulin binding [GO:0048487]; post-chaperonin tubulin folding pathway [GO:0007023]; tubulin complex assembly [GO:0007021]	post-chaperonin tubulin folding pathway [GO:0007023]; tubulin complex assembly [GO:0007021]	beta-tubulin binding [GO:0048487]	cytoplasm [GO:0005737]; microtubule [GO:0005874]	25726342
A0A0D2NUG0	A0A0D2NUG0_9CHLO	unreviewed	Uncharacterized protein	MNEG_0225	Monoraphidium neglectum			integral component of membrane [GO:0016021]; solute:proton antiporter activity [GO:0015299]; potassium ion transport [GO:0006813]	potassium ion transport [GO:0006813]	solute:proton antiporter activity [GO:0015299]	integral component of membrane [GO:0016021]	25726343
A0A0D2N636	A0A0D2N636_9CHLO	unreviewed	Solute carrier family 35 member E3	MNEG_0226	Monoraphidium neglectum			integral component of membrane [GO:0016021]			integral component of membrane [GO:0016021]	25726344
A0A0D2KCE4	A0A0D2KCE4_9CHLO	unreviewed	Uncharacterized protein	MNEG_0227	Monoraphidium neglectum			catalytic activity [GO:0003824]		catalytic activity [GO:0003824]		25726345
A0A0D2LN89	A0A0D2LN89_9CHLO	unreviewed	Ubiquinol oxidase (EC 1.10.3.11)	MNEG_0228	Monoraphidium neglectum		CATALYTIC ACTIVITY: 2 ubiquinol + O(2) = 2 ubiquinone + 2 H(2)O. {ECO:0000256|RuleBase:RU003779}.	integral component of membrane [GO:0016021]; respiratory chain [GO:0070469]; alternative oxidase activity [GO:0009916]; metal ion binding [GO:0046872]		alternative oxidase activity [GO:0009916]; metal ion binding [GO:0046872]	integral component of membrane [GO:0016021]; respiratory chain [GO:0070469]	25726346
A0A0D2MZA0	A0A0D2MZA0_9CHLO	unreviewed	Subunit of the ESCRT-I complex	MNEG_0229	Monoraphidium neglectum			protein transport [GO:0015031]	protein transport [GO:0015031]			25726347
A0A0D2NUG4	A0A0D2NUG4_9CHLO	unreviewed	Uncharacterized protein	MNEG_0230	Monoraphidium neglectum							25726348
A0A0D2N639	A0A0D2N639_9CHLO	unreviewed	Flagellar associated protein	MNEG_0231	Monoraphidium neglectum			motile cilium [GO:0031514]			motile cilium [GO:0031514]	25726349
A0A0D2KCE7	A0A0D2KCE7_9CHLO	unreviewed	Putative MFS transporter, AGZA family, xanthine/uracil permease	MNEG_0232	Monoraphidium neglectum			integral component of membrane [GO:0016021]; transporter activity [GO:0005215]; transmembrane transport [GO:0055085]	transmembrane transport [GO:0055085]	transporter activity [GO:0005215]	integral component of membrane [GO:0016021]	25726350
A0A0D2LN93	A0A0D2LN93_9CHLO	unreviewed	Uncharacterized protein	MNEG_0233	Monoraphidium neglectum							25726351
A0A0D2MZA4	A0A0D2MZA4_9CHLO	unreviewed	Uncharacterized protein	MNEG_0234	Monoraphidium neglectum			starch binding [GO:2001070]		starch binding [GO:2001070]		25726352
A0A0D2KCB8	A0A0D2KCB8_9CHLO	unreviewed	Phosphoglycerate mutase	MNEG_0235	Monoraphidium neglectum			integral component of membrane [GO:0016021]			integral component of membrane [GO:0016021]	25726353
A0A0D2LN68	A0A0D2LN68_9CHLO	unreviewed	Uncharacterized protein	MNEG_0236	Monoraphidium neglectum			ATP binding [GO:0005524]; protein serine/threonine kinase activity [GO:0004674]		ATP binding [GO:0005524]; protein serine/threonine kinase activity [GO:0004674]		25726354
A0A0D2MZ82	A0A0D2MZ82_9CHLO	unreviewed	Cytochrome P450 (EC 1.14.-.-)	MNEG_0237	Monoraphidium neglectum			heme binding [GO:0020037]; iron ion binding [GO:0005506]; monooxygenase activity [GO:0004497]; oxidoreductase activity, acting on paired donors, with incorporation or reduction of molecular oxygen [GO:0016705]		heme binding [GO:0020037]; iron ion binding [GO:0005506]; monooxygenase activity [GO:0004497]; oxidoreductase activity, acting on paired donors, with incorporation or reduction of molecular oxygen [GO:0016705]		25726355
A0A0D2NUE4	A0A0D2NUE4_9CHLO	unreviewed	Uncharacterized protein	MNEG_0238	Monoraphidium neglectum							25726356
A0A0D2N622	A0A0D2N622_9CHLO	unreviewed	Uncharacterized protein	MNEG_0239	Monoraphidium neglectum							25726357
A0A0D2KCC5	A0A0D2KCC5_9CHLO	unreviewed	Uncharacterized protein	MNEG_0240	Monoraphidium neglectum			mismatch repair complex [GO:0032300]; mismatch repair [GO:0006298]; reciprocal meiotic recombination [GO:0007131]	mismatch repair [GO:0006298]; reciprocal meiotic recombination [GO:0007131]		mismatch repair complex [GO:0032300]	25726358
A0A0D2LN71	A0A0D2LN71_9CHLO	unreviewed	Putative tartrate transporter	MNEG_0241	Monoraphidium neglectum			integral component of membrane [GO:0016021]; transmembrane transport [GO:0055085]	transmembrane transport [GO:0055085]		integral component of membrane [GO:0016021]	25726359
A0A0D2MZ85	A0A0D2MZ85_9CHLO	unreviewed	D-lactate dehydrogenase (Cytochrome) (EC 1.1.2.4)	MNEG_0242	Monoraphidium neglectum			D-lactate dehydrogenase (cytochrome) activity [GO:0004458]; flavin adenine dinucleotide binding [GO:0050660]		D-lactate dehydrogenase (cytochrome) activity [GO:0004458]; flavin adenine dinucleotide binding [GO:0050660]		25726360
A0A0D2NUE7	A0A0D2NUE7_9CHLO	unreviewed	Uncharacterized protein	MNEG_0243	Monoraphidium neglectum							25726361
A0A0D2N625	A0A0D2N625_9CHLO	unreviewed	Uncharacterized protein	MNEG_0244	Monoraphidium neglectum							25726362
A0A0D2KCC9	A0A0D2KCC9_9CHLO	unreviewed	Uncharacterized protein	MNEG_0245	Monoraphidium neglectum			transcription corepressor activity [GO:0003714]; transcription, DNA-templated [GO:0006351]	transcription, DNA-templated [GO:0006351]	transcription corepressor activity [GO:0003714]		25726363
A0A0D2LN75	A0A0D2LN75_9CHLO	unreviewed	Uncharacterized protein	MNEG_0246	Monoraphidium neglectum							25726364
A0A0D2MZ89	A0A0D2MZ89_9CHLO	unreviewed	Uncharacterized protein	MNEG_0247	Monoraphidium neglectum							25726365
A0A0D2NUF3	A0A0D2NUF3_9CHLO	unreviewed	Uncharacterized protein	MNEG_0248	Monoraphidium neglectum							25726366
A0A0D2N628	A0A0D2N628_9CHLO	unreviewed	Putative Pre-mRNA-processing factor 6	MNEG_0249	Monoraphidium neglectum			mRNA splicing, via spliceosome [GO:0000398]	mRNA splicing, via spliceosome [GO:0000398]			25726367
A0A0D2N609	A0A0D2N609_9CHLO	unreviewed	Sulfite reductase (NADPH) flavoprotein alpha-component (EC 1.8.1.2)	MNEG_0250	Monoraphidium neglectum			integral component of membrane [GO:0016021]; FMN binding [GO:0010181]; sulfite reductase (NADPH) activity [GO:0004783]		FMN binding [GO:0010181]; sulfite reductase (NADPH) activity [GO:0004783]	integral component of membrane [GO:0016021]	25726368
A0A0D2KCA5	A0A0D2KCA5_9CHLO	unreviewed	Manganese transport protein	MNEG_0251	Monoraphidium neglectum			integral component of membrane [GO:0016021]; transporter activity [GO:0005215]		transporter activity [GO:0005215]	integral component of membrane [GO:0016021]	25726369
A0A0D2LN55	A0A0D2LN55_9CHLO	unreviewed	Uncharacterized protein	MNEG_0252	Monoraphidium neglectum							25726370
A0A0D2MZ70	A0A0D2MZ70_9CHLO	unreviewed	MAP kinase phosphatase 5	MNEG_0253	Monoraphidium neglectum			kinase activity [GO:0016301]; protein tyrosine phosphatase activity [GO:0004725]; protein tyrosine/serine/threonine phosphatase activity [GO:0008138]		kinase activity [GO:0016301]; protein tyrosine/serine/threonine phosphatase activity [GO:0008138]; protein tyrosine phosphatase activity [GO:0004725]		25726371
A0A0D2NUD0	A0A0D2NUD0_9CHLO	unreviewed	Uncharacterized protein	MNEG_0254	Monoraphidium neglectum							25726372
A0A0D2N611	A0A0D2N611_9CHLO	unreviewed	Uncharacterized protein	MNEG_0255	Monoraphidium neglectum							25726373
A0A0D2KCB1	A0A0D2KCB1_9CHLO	unreviewed	Uncharacterized protein	MNEG_0256	Monoraphidium neglectum			biosynthetic process [GO:0009058]	biosynthetic process [GO:0009058]			25726374
A0A0D2LN60	A0A0D2LN60_9CHLO	unreviewed	Exosome complex exonuclease RRP40 (EC 3.1.13.-)	MNEG_0257	Monoraphidium neglectum			exosome (RNase complex) [GO:0000178]; exonuclease activity [GO:0004527]; RNA binding [GO:0003723]		exonuclease activity [GO:0004527]; RNA binding [GO:0003723]	exosome (RNase complex) [GO:0000178]	25726375
A0A0D2MZ72	A0A0D2MZ72_9CHLO	unreviewed	Uncharacterized protein	MNEG_0258	Monoraphidium neglectum			integral component of membrane [GO:0016021]; cation-transporting ATPase activity [GO:0019829]; metal ion binding [GO:0046872]; nucleotide binding [GO:0000166]; metal ion transport [GO:0030001]	metal ion transport [GO:0030001]	cation-transporting ATPase activity [GO:0019829]; metal ion binding [GO:0046872]; nucleotide binding [GO:0000166]	integral component of membrane [GO:0016021]	25726376
A0A0D2NUD4	A0A0D2NUD4_9CHLO	unreviewed	Uncharacterized protein	MNEG_0259	Monoraphidium neglectum			integral component of membrane [GO:0016021]; transport [GO:0006810]	transport [GO:0006810]		integral component of membrane [GO:0016021]	25726377
A0A0D2N616	A0A0D2N616_9CHLO	unreviewed	Uncharacterized protein	MNEG_0260	Monoraphidium neglectum							25726378
A0A0D2KCB2	A0A0D2KCB2_9CHLO	unreviewed	Oxidoreductase NAD-binding domain-containingprotein 1 (EC 1.-.-.-)	MNEG_0261	Monoraphidium neglectum			oxidoreductase activity [GO:0016491]		oxidoreductase activity [GO:0016491]		25726379
A0A0D2LN64	A0A0D2LN64_9CHLO	unreviewed	Nuclear transport factor 2	MNEG_0262	Monoraphidium neglectum			intracellular [GO:0005622]; transport [GO:0006810]	transport [GO:0006810]		intracellular [GO:0005622]	25726380
A0A0D2MZ76	A0A0D2MZ76_9CHLO	unreviewed	Putative TLD domain-containing protein	MNEG_0263	Monoraphidium neglectum							25726381
A0A0D2NUE0	A0A0D2NUE0_9CHLO	unreviewed	SKP1-like protein 1A	MNEG_0264	Monoraphidium neglectum			ubiquitin-dependent protein catabolic process [GO:0006511]	ubiquitin-dependent protein catabolic process [GO:0006511]			25726382
A0A0D2N618	A0A0D2N618_9CHLO	unreviewed	Protein arginine N-methyltransferase 5 (EC 2.1.1.125)	MNEG_0265	Monoraphidium neglectum			methyltransferase activity [GO:0008168]; peptidyl-arginine N-methylation [GO:0035246]	peptidyl-arginine N-methylation [GO:0035246]	methyltransferase activity [GO:0008168]		25726383
A0A0D2LN46	A0A0D2LN46_9CHLO	unreviewed	Uncharacterized protein (Fragment)	MNEG_0266	Monoraphidium neglectum							25726384
A0A0D2MZ61	A0A0D2MZ61_9CHLO	unreviewed	Uncharacterized protein	MNEG_0267	Monoraphidium neglectum							25726385
A0A0D2NUB8	A0A0D2NUB8_9CHLO	unreviewed	Uncharacterized protein	MNEG_0268	Monoraphidium neglectum			calcium ion binding [GO:0005509]		calcium ion binding [GO:0005509]		25726386
A0A0D2N603	A0A0D2N603_9CHLO	unreviewed	Uncharacterized protein	MNEG_0269	Monoraphidium neglectum							25726387
A0A0D2KC96	A0A0D2KC96_9CHLO	unreviewed	Uncharacterized protein	MNEG_0270	Monoraphidium neglectum							25726388
A0A0D2LN48	A0A0D2LN48_9CHLO	unreviewed	Hyperpolarization activated cyclicnucleotide-gated potassium channel 4	MNEG_0271	Monoraphidium neglectum			integral component of membrane [GO:0016021]			integral component of membrane [GO:0016021]	25726389
A0A0D2MZ64	A0A0D2MZ64_9CHLO	unreviewed	Uncharacterized protein	MNEG_0272	Monoraphidium neglectum							25726390
A0A0D2NUC2	A0A0D2NUC2_9CHLO	unreviewed	Uncharacterized protein	MNEG_0273	Monoraphidium neglectum							25726391
A0A0D2N605	A0A0D2N605_9CHLO	unreviewed	Uncharacterized protein	MNEG_0274	Monoraphidium neglectum							25726392
A0A0D2KCA2	A0A0D2KCA2_9CHLO	unreviewed	Uncharacterized protein	MNEG_0275	Monoraphidium neglectum							25726393
A0A0D2LN51	A0A0D2LN51_9CHLO	unreviewed	ATP-dependent RNA helicase DDX35 (EC 3.6.1.-)	MNEG_0276	Monoraphidium neglectum			helicase activity [GO:0004386]		helicase activity [GO:0004386]		25726394
A0A0D2MZ69	A0A0D2MZ69_9CHLO	unreviewed	Uncharacterized protein	MNEG_0277	Monoraphidium neglectum			integral component of membrane [GO:0016021]; signal peptidase complex [GO:0005787]; peptidase activity [GO:0008233]; signal peptide processing [GO:0006465]	signal peptide processing [GO:0006465]	peptidase activity [GO:0008233]	integral component of membrane [GO:0016021]; signal peptidase complex [GO:0005787]	25726395
A0A0D2NUC6	A0A0D2NUC6_9CHLO	unreviewed	Uncharacterized protein	MNEG_0278	Monoraphidium neglectum							25726396
A0A0D2LN40	A0A0D2LN40_9CHLO	unreviewed	Uncharacterized protein	MNEG_0279	Monoraphidium neglectum							25726397
A0A0D2MZ52	A0A0D2MZ52_9CHLO	unreviewed	Uncharacterized protein	MNEG_0280	Monoraphidium neglectum							25726398
A0A0D2NUB3	A0A0D2NUB3_9CHLO	unreviewed	Kinesin-like protein	MNEG_0281	Monoraphidium neglectum			microtubule [GO:0005874]; ATP binding [GO:0005524]; microtubule binding [GO:0008017]; microtubule motor activity [GO:0003777]; microtubule-based movement [GO:0007018]	microtubule-based movement [GO:0007018]	ATP binding [GO:0005524]; microtubule binding [GO:0008017]; microtubule motor activity [GO:0003777]	microtubule [GO:0005874]	25726399
A0A0D2N5Z6	A0A0D2N5Z6_9CHLO	unreviewed	Uncharacterized protein	MNEG_0282	Monoraphidium neglectum			Cdc73/Paf1 complex [GO:0016593]; histone modification [GO:0016570]; transcription elongation from RNA polymerase II promoter [GO:0006368]	histone modification [GO:0016570]; transcription elongation from RNA polymerase II promoter [GO:0006368]		Cdc73/Paf1 complex [GO:0016593]	25726400
A0A0D2KC88	A0A0D2KC88_9CHLO	unreviewed	Uncharacterized protein	MNEG_0283	Monoraphidium neglectum			protein serine/threonine phosphatase activity [GO:0004722]		protein serine/threonine phosphatase activity [GO:0004722]		25726401
A0A0D2LN42	A0A0D2LN42_9CHLO	unreviewed	Beta-fructofuranosidase (EC 3.2.1.26)	MNEG_0284	Monoraphidium neglectum			sucrose alpha-glucosidase activity [GO:0004575]; carbohydrate metabolic process [GO:0005975]	carbohydrate metabolic process [GO:0005975]	sucrose alpha-glucosidase activity [GO:0004575]		25726402
A0A0D2MZ56	A0A0D2MZ56_9CHLO	unreviewed	Adaptor protein complex, sigma subunit	MNEG_0285	Monoraphidium neglectum			membrane coat [GO:0030117]; protein transporter activity [GO:0008565]; intracellular protein transport [GO:0006886]; vesicle-mediated transport [GO:0016192]	intracellular protein transport [GO:0006886]; vesicle-mediated transport [GO:0016192]	protein transporter activity [GO:0008565]	membrane coat [GO:0030117]	25726403
A0A0D2NUB6	A0A0D2NUB6_9CHLO	unreviewed	Uncharacterized protein	MNEG_0286	Monoraphidium neglectum							25726404
A0A0D2N5Z9	A0A0D2N5Z9_9CHLO	unreviewed	Molecular chaperone DnaK (EC 1.3.1.74)	MNEG_0287	Monoraphidium neglectum			2-alkenal reductase [NAD(P)] activity [GO:0032440]; ATP binding [GO:0005524]		2-alkenal reductase [NAD(P)] activity [GO:0032440]; ATP binding [GO:0005524]		25726405
A0A0D2KC93	A0A0D2KC93_9CHLO	unreviewed	Uncharacterized protein	MNEG_0288	Monoraphidium neglectum			integral component of membrane [GO:0016021]			integral component of membrane [GO:0016021]	25726406
A0A0D2MZ37	A0A0D2MZ37_9CHLO	unreviewed	Uncharacterized protein	MNEG_0289	Monoraphidium neglectum							25726407
A0A0D2NUA6	A0A0D2NUA6_9CHLO	unreviewed	Uncharacterized protein	MNEG_0290	Monoraphidium neglectum							25726408
A0A0D2N5Y6	A0A0D2N5Y6_9CHLO	unreviewed	Methyltransferase (EC 2.1.1.-)	MNEG_0291	Monoraphidium neglectum			methyltransferase activity [GO:0008168]; nucleic acid binding [GO:0003676]		methyltransferase activity [GO:0008168]; nucleic acid binding [GO:0003676]		25726409
A0A0D2KC77	A0A0D2KC77_9CHLO	unreviewed	Uncharacterized protein	MNEG_0292	Monoraphidium neglectum			integral component of membrane [GO:0016021]			integral component of membrane [GO:0016021]	25726410
A0A0D2LN34	A0A0D2LN34_9CHLO	unreviewed	Dynein heavy chain, axonemal (EC 3.6.1.3)	MNEG_0293	Monoraphidium neglectum			axoneme [GO:0005930]; ATP binding [GO:0005524]; ATPase activity [GO:0016887]; microtubule motor activity [GO:0003777]; microtubule-based movement [GO:0007018]	microtubule-based movement [GO:0007018]	ATPase activity [GO:0016887]; ATP binding [GO:0005524]; microtubule motor activity [GO:0003777]	axoneme [GO:0005930]	25726411
A0A0D2MZ42	A0A0D2MZ42_9CHLO	unreviewed	Dynein heavy chain 6, axonemal	MNEG_0294	Monoraphidium neglectum			axoneme [GO:0005930]; microtubule motor activity [GO:0003777]; microtubule-based movement [GO:0007018]	microtubule-based movement [GO:0007018]	microtubule motor activity [GO:0003777]	axoneme [GO:0005930]	25726412
A0A0D2NUA9	A0A0D2NUA9_9CHLO	unreviewed	Dynein-1-alpha heavy chain, flagellar inner armI1 complex	MNEG_0295	Monoraphidium neglectum			axoneme [GO:0005930]; dynein complex [GO:0030286]; integral component of membrane [GO:0016021]; motile cilium [GO:0031514]; microtubule motor activity [GO:0003777]; microtubule-based movement [GO:0007018]	microtubule-based movement [GO:0007018]	microtubule motor activity [GO:0003777]	axoneme [GO:0005930]; dynein complex [GO:0030286]; integral component of membrane [GO:0016021]; motile cilium [GO:0031514]	25726413
A0A0D2N5Z0	A0A0D2N5Z0_9CHLO	unreviewed	Uncharacterized protein	MNEG_0296	Monoraphidium neglectum							25726414
A0A0D2KC82	A0A0D2KC82_9CHLO	unreviewed	Uncharacterized protein	MNEG_0297	Monoraphidium neglectum			dynein complex [GO:0030286]; microtubule motor activity [GO:0003777]; microtubule-based movement [GO:0007018]	microtubule-based movement [GO:0007018]	microtubule motor activity [GO:0003777]	dynein complex [GO:0030286]	25726415
A0A0D2LN37	A0A0D2LN37_9CHLO	unreviewed	Uncharacterized protein	MNEG_0298	Monoraphidium neglectum							25726416
A0A0D2MZ47	A0A0D2MZ47_9CHLO	unreviewed	Prolyl endopeptidase (EC 3.4.21.26)	MNEG_0299	Monoraphidium neglectum			serine-type endopeptidase activity [GO:0004252]		serine-type endopeptidase activity [GO:0004252]		25726417
A0A0D2NUB1	A0A0D2NUB1_9CHLO	unreviewed	Prolyl endopeptidase (EC 3.4.21.26)	MNEG_0300	Monoraphidium neglectum			serine-type endopeptidase activity [GO:0004252]; serine-type exopeptidase activity [GO:0070008]		serine-type endopeptidase activity [GO:0004252]; serine-type exopeptidase activity [GO:0070008]		25726418
A0A0D2N5Z3	A0A0D2N5Z3_9CHLO	unreviewed	Ribosomal RNA large subunit methyltransferase N (EC 2.1.1.-)	MNEG_0301	Monoraphidium neglectum			cytoplasm [GO:0005737]; iron-sulfur cluster binding [GO:0051536]; RNA methyltransferase activity [GO:0008173]; rRNA processing [GO:0006364]	rRNA processing [GO:0006364]	iron-sulfur cluster binding [GO:0051536]; RNA methyltransferase activity [GO:0008173]	cytoplasm [GO:0005737]	25726419
A0A0D2KC84	A0A0D2KC84_9CHLO	unreviewed	Uncharacterized protein	MNEG_0302	Monoraphidium neglectum							25726420
A0A0D2KC27	A0A0D2KC27_9CHLO	unreviewed	Sulfoquinovosyltransferase (EC 2.4.1.-)	MNEG_0303	Monoraphidium neglectum			integral component of membrane [GO:0016021]; transferase activity, transferring glycosyl groups [GO:0016757]		transferase activity, transferring glycosyl groups [GO:0016757]	integral component of membrane [GO:0016021]	25726421
A0A0D2LMZ3	A0A0D2LMZ3_9CHLO	unreviewed	Uncharacterized protein	MNEG_0304	Monoraphidium neglectum							25726422
A0A0D2MYY9	A0A0D2MYY9_9CHLO	unreviewed	Myosin-9	MNEG_0305	Monoraphidium neglectum			myosin complex [GO:0016459]; ATP binding [GO:0005524]; motor activity [GO:0003774]		ATP binding [GO:0005524]; motor activity [GO:0003774]	myosin complex [GO:0016459]	25726423
A0A0D2NU59	A0A0D2NU59_9CHLO	unreviewed	DNA-directed RNA polymerases I, II, and III subunit RPABC5	MNEG_0306	Monoraphidium neglectum			DNA binding [GO:0003677]; DNA-directed 5'-3' RNA polymerase activity [GO:0003899]; zinc ion binding [GO:0008270]; transcription, DNA-templated [GO:0006351]	transcription, DNA-templated [GO:0006351]	DNA binding [GO:0003677]; DNA-directed 5'-3' RNA polymerase activity [GO:0003899]; zinc ion binding [GO:0008270]		25726424
A0A0D2N5V2	A0A0D2N5V2_9CHLO	unreviewed	Coiled-coil domain-containing like protein 42	MNEG_0307	Monoraphidium neglectum							25726425
A0A0D2KC37	A0A0D2KC37_9CHLO	unreviewed	Metacaspase-2 (EC 3.4.22.-)	MNEG_0308	Monoraphidium neglectum			hydrolase activity [GO:0016787]		hydrolase activity [GO:0016787]		25726426
A0A0D2LMZ9	A0A0D2LMZ9_9CHLO	unreviewed	Metacaspase-2 (EC 3.4.22.-)	MNEG_0309	Monoraphidium neglectum			integral component of membrane [GO:0016021]; hydrolase activity [GO:0016787]		hydrolase activity [GO:0016787]	integral component of membrane [GO:0016021]	25726427
A0A0D2MZ02	A0A0D2MZ02_9CHLO	unreviewed	Uncharacterized protein	MNEG_0310	Monoraphidium neglectum							25726428
A0A0D2NU66	A0A0D2NU66_9CHLO	unreviewed	RNA-binding protein 42	MNEG_0311	Monoraphidium neglectum			RNA binding [GO:0003723]		RNA binding [GO:0003723]		25726429
A0A0D2N5V7	A0A0D2N5V7_9CHLO	unreviewed	Uncharacterized protein	MNEG_0312	Monoraphidium neglectum							25726430
A0A0D2KC48	A0A0D2KC48_9CHLO	unreviewed	Uncharacterized protein	MNEG_0313	Monoraphidium neglectum							25726431
A0A0D2LN07	A0A0D2LN07_9CHLO	unreviewed	Cationic amino acid transporter	MNEG_0314	Monoraphidium neglectum			integral component of membrane [GO:0016021]; amino acid transmembrane transporter activity [GO:0015171]		amino acid transmembrane transporter activity [GO:0015171]	integral component of membrane [GO:0016021]	25726432
A0A0D2MZ29	A0A0D2MZ29_9CHLO	unreviewed	Uncharacterized protein	MNEG_0315	Monoraphidium neglectum							25726433
A0A0D2NU98	A0A0D2NU98_9CHLO	unreviewed	Uncharacterized protein	MNEG_0316	Monoraphidium neglectum			transcription factor activity, sequence-specific DNA binding [GO:0003700]		transcription factor activity, sequence-specific DNA binding [GO:0003700]		25726434
A0A0D2KC72	A0A0D2KC72_9CHLO	unreviewed	Uncharacterized protein	MNEG_0318	Monoraphidium neglectum							25726436
A0A0D2LN33	A0A0D2LN33_9CHLO	unreviewed	Uncharacterized protein	MNEG_0319	Monoraphidium neglectum			endoplasmic reticulum membrane [GO:0005789]; GTP binding [GO:0005525]; hydrolase activity [GO:0016787]		GTP binding [GO:0005525]; hydrolase activity [GO:0016787]	endoplasmic reticulum membrane [GO:0005789]	25726437
A0A0D2LMY2	A0A0D2LMY2_9CHLO	unreviewed	Uncharacterized protein (Fragment)	MNEG_0320	Monoraphidium neglectum							25726438
A0A0D2MYX0	A0A0D2MYX0_9CHLO	unreviewed	Intraflagellar transport protein	MNEG_0321	Monoraphidium neglectum			motile cilium [GO:0031514]			motile cilium [GO:0031514]	25726439
A0A0D2NU42	A0A0D2NU42_9CHLO	unreviewed	Intraflagellar transport protein	MNEG_0322	Monoraphidium neglectum			motile cilium [GO:0031514]			motile cilium [GO:0031514]	25726440
A0A0D2N5U1	A0A0D2N5U1_9CHLO	unreviewed	Mannosidase, beta A, lysosomal (EC 3.2.1.25)	MNEG_0323	Monoraphidium neglectum			beta-mannosidase activity [GO:0004567]; carbohydrate metabolic process [GO:0005975]	carbohydrate metabolic process [GO:0005975]	beta-mannosidase activity [GO:0004567]		25726441
A0A0D2KC16	A0A0D2KC16_9CHLO	unreviewed	Protein tas	MNEG_0324	Monoraphidium neglectum							25726442
A0A0D2LMY7	A0A0D2LMY7_9CHLO	unreviewed	Uncharacterized protein	MNEG_0325	Monoraphidium neglectum			ATP binding [GO:0005524]; protein kinase activity [GO:0004672]		ATP binding [GO:0005524]; protein kinase activity [GO:0004672]		25726443
A0A0D2MYX9	A0A0D2MYX9_9CHLO	unreviewed	Uncharacterized protein	MNEG_0326	Monoraphidium neglectum			ATP binding [GO:0005524]; protein kinase activity [GO:0004672]		ATP binding [GO:0005524]; protein kinase activity [GO:0004672]		25726444
A0A0D2NU51	A0A0D2NU51_9CHLO	unreviewed	ATP-dependent Clp protease adaptor protein ClpS	MNEG_0327	Monoraphidium neglectum			peptidase activity [GO:0008233]; protein catabolic process [GO:0030163]	protein catabolic process [GO:0030163]	peptidase activity [GO:0008233]		25726445
A0A0D2N5U7	A0A0D2N5U7_9CHLO	unreviewed	Putative MFS transporter, AGZA family, xanthine/uracil permease	MNEG_0328	Monoraphidium neglectum			integral component of membrane [GO:0016021]; transporter activity [GO:0005215]; transmembrane transport [GO:0055085]	transmembrane transport [GO:0055085]	transporter activity [GO:0005215]	integral component of membrane [GO:0016021]	25726446
A0A0D2LMW7	A0A0D2LMW7_9CHLO	unreviewed	Uncharacterized protein (Fragment)	MNEG_0329	Monoraphidium neglectum							25726447
A0A0D2MYV6	A0A0D2MYV6_9CHLO	unreviewed	Uncharacterized protein	MNEG_0330	Monoraphidium neglectum							25726448
A0A0D2NU25	A0A0D2NU25_9CHLO	unreviewed	Uncharacterized protein	MNEG_0331	Monoraphidium neglectum							25726449
A0A0D2N5T0	A0A0D2N5T0_9CHLO	unreviewed	Uncharacterized protein	MNEG_0332	Monoraphidium neglectum			integral component of membrane [GO:0016021]			integral component of membrane [GO:0016021]	25726450
A0A0D2KBZ7	A0A0D2KBZ7_9CHLO	unreviewed	Uncharacterized protein	MNEG_0333	Monoraphidium neglectum							25726451
A0A0D2LMX6	A0A0D2LMX6_9CHLO	unreviewed	Uncharacterized protein	MNEG_0334	Monoraphidium neglectum			integral component of membrane [GO:0016021]			integral component of membrane [GO:0016021]	25726452
A0A0D2MYW1	A0A0D2MYW1_9CHLO	unreviewed	Uncharacterized protein	MNEG_0335	Monoraphidium neglectum			protein-tyrosine sulfotransferase activity [GO:0008476]; peptidyl-tyrosine sulfation [GO:0006478]	peptidyl-tyrosine sulfation [GO:0006478]	protein-tyrosine sulfotransferase activity [GO:0008476]		25726453
A0A0D2NU35	A0A0D2NU35_9CHLO	unreviewed	Uncharacterized protein	MNEG_0336	Monoraphidium neglectum							25726454
A0A0D2N5T7	A0A0D2N5T7_9CHLO	unreviewed	Uncharacterized protein	MNEG_0337	Monoraphidium neglectum			integral component of membrane [GO:0016021]			integral component of membrane [GO:0016021]	25726455
A0A0D2KC09	A0A0D2KC09_9CHLO	unreviewed	Uncharacterized protein	MNEG_0338	Monoraphidium neglectum							25726456
A0A0D2LMW1	A0A0D2LMW1_9CHLO	unreviewed	Centromeric protein E	MNEG_0339	Monoraphidium neglectum			ATP binding [GO:0005524]; microtubule binding [GO:0008017]; microtubule motor activity [GO:0003777]; microtubule-based movement [GO:0007018]	microtubule-based movement [GO:0007018]	ATP binding [GO:0005524]; microtubule binding [GO:0008017]; microtubule motor activity [GO:0003777]		25726457
A0A0D2MYV1	A0A0D2MYV1_9CHLO	unreviewed	Uncharacterized protein	MNEG_0340	Monoraphidium neglectum			integral component of membrane [GO:0016021]			integral component of membrane [GO:0016021]	25726458
A0A0D2NU17	A0A0D2NU17_9CHLO	unreviewed	Glutathione S-transferase (EC 2.5.1.18)	MNEG_0341	Monoraphidium neglectum			glutathione transferase activity [GO:0004364]		glutathione transferase activity [GO:0004364]		25726459
A0A0D2N5S3	A0A0D2N5S3_9CHLO	unreviewed	Uncharacterized protein	MNEG_0342	Monoraphidium neglectum							25726460
A0A0D2KBY8	A0A0D2KBY8_9CHLO	unreviewed	Uncharacterized protein	MNEG_0343	Monoraphidium neglectum							25726461
A0A0D2N5Q4	A0A0D2N5Q4_9CHLO	unreviewed	Uncharacterized protein	MNEG_0344	Monoraphidium neglectum							25726462
A0A0D2KBV5	A0A0D2KBV5_9CHLO	unreviewed	Uncharacterized protein	MNEG_0345	Monoraphidium neglectum							25726463
A0A0D2LMU8	A0A0D2LMU8_9CHLO	unreviewed	Uncharacterized protein	MNEG_0346	Monoraphidium neglectum							25726464
A0A0D2MYT1	A0A0D2MYT1_9CHLO	unreviewed	Uncharacterized protein	MNEG_0347	Monoraphidium neglectum			2 iron, 2 sulfur cluster binding [GO:0051537]; oxidoreductase activity [GO:0016491]		2 iron, 2 sulfur cluster binding [GO:0051537]; oxidoreductase activity [GO:0016491]		25726465
A0A0D2NU03	A0A0D2NU03_9CHLO	unreviewed	Alcohol dehydrogenase (EC 1.6.5.5)	MNEG_0348	Monoraphidium neglectum			NADPH:quinone reductase activity [GO:0003960]		NADPH:quinone reductase activity [GO:0003960]		25726466
A0A0D2N5R1	A0A0D2N5R1_9CHLO	unreviewed	Uncharacterized protein	MNEG_0349	Monoraphidium neglectum							25726467
A0A0D2KBW7	A0A0D2KBW7_9CHLO	unreviewed	Uncharacterized protein	MNEG_0350	Monoraphidium neglectum			integral component of membrane [GO:0016021]			integral component of membrane [GO:0016021]	25726468
A0A0D2LMV4	A0A0D2LMV4_9CHLO	unreviewed	Uncharacterized protein	MNEG_0351	Monoraphidium neglectum							25726469
A0A0D2MYU1	A0A0D2MYU1_9CHLO	unreviewed	Anaphase-promoting complex subunit 8	MNEG_0352	Monoraphidium neglectum			anaphase-promoting complex [GO:0005680]; integral component of membrane [GO:0016021]; regulation of mitotic metaphase/anaphase transition [GO:0030071]	regulation of mitotic metaphase/anaphase transition [GO:0030071]		anaphase-promoting complex [GO:0005680]; integral component of membrane [GO:0016021]	25726470
A0A0D2NU10	A0A0D2NU10_9CHLO	unreviewed	Uncharacterized protein	MNEG_0353	Monoraphidium neglectum			nucleus [GO:0005634]; histone binding [GO:0042393]; metal ion binding [GO:0046872]; RNA binding [GO:0003723]		histone binding [GO:0042393]; metal ion binding [GO:0046872]; RNA binding [GO:0003723]	nucleus [GO:0005634]	25726471
A0A0D2N5R7	A0A0D2N5R7_9CHLO	unreviewed	Uncharacterized protein	MNEG_0354	Monoraphidium neglectum			2-C-methyl-D-erythritol 4-phosphate cytidylyltransferase activity [GO:0050518]; isoprenoid biosynthetic process [GO:0008299]	isoprenoid biosynthetic process [GO:0008299]	2-C-methyl-D-erythritol 4-phosphate cytidylyltransferase activity [GO:0050518]		25726472
A0A0D2KBX7	A0A0D2KBX7_9CHLO	unreviewed	Uncharacterized protein	MNEG_0355	Monoraphidium neglectum							25726473
A0A0D2N5P3	A0A0D2N5P3_9CHLO	unreviewed	Uncharacterized protein	MNEG_0356	Monoraphidium neglectum							25726474
A0A0D2KBT0	A0A0D2KBT0_9CHLO	unreviewed	Selenocysteine-specific elongation factor	MNEG_0357	Monoraphidium neglectum			GTP binding [GO:0005525]; GTPase activity [GO:0003924]; translation elongation factor activity [GO:0003746]		GTPase activity [GO:0003924]; GTP binding [GO:0005525]; translation elongation factor activity [GO:0003746]		25726475
A0A0D2LMT0	A0A0D2LMT0_9CHLO	unreviewed	S-acyltransferase (EC 2.3.1.225) (Palmitoyltransferase)	MNEG_0358	Monoraphidium neglectum		CATALYTIC ACTIVITY: Palmitoyl-CoA + [protein]-L-cysteine = [protein]-S-palmitoyl-L-cysteine + CoA. {ECO:0000256|RuleBase:RU079119}.	integral component of membrane [GO:0016021]; protein-cysteine S-palmitoyltransferase activity [GO:0019706]		protein-cysteine S-palmitoyltransferase activity [GO:0019706]	integral component of membrane [GO:0016021]	25726476
A0A0D2MYR4	A0A0D2MYR4_9CHLO	unreviewed	Uncharacterized protein	MNEG_0359	Monoraphidium neglectum							25726477
A0A0D2NTY9	A0A0D2NTY9_9CHLO	unreviewed	Platelet-activating factor acetylhydrolase 2,40kDa (EC 3.1.1.47)	MNEG_0360	Monoraphidium neglectum			1-alkyl-2-acetylglycerophosphocholine esterase activity [GO:0003847]; lipid catabolic process [GO:0016042]	lipid catabolic process [GO:0016042]	1-alkyl-2-acetylglycerophosphocholine esterase activity [GO:0003847]		25726478
A0A0D2N5P9	A0A0D2N5P9_9CHLO	unreviewed	Uncharacterized protein	MNEG_0361	Monoraphidium neglectum							25726479
A0A0D2KBU4	A0A0D2KBU4_9CHLO	unreviewed	Chlorophyll a-b binding protein, chloroplastic	MNEG_0362	Monoraphidium neglectum			chloroplast thylakoid membrane [GO:0009535]; integral component of membrane [GO:0016021]; photosystem I [GO:0009522]; photosystem II [GO:0009523]; chlorophyll binding [GO:0016168]; photosynthesis, light harvesting [GO:0009765]; protein-chromophore linkage [GO:0018298]	photosynthesis, light harvesting [GO:0009765]; protein-chromophore linkage [GO:0018298]	chlorophyll binding [GO:0016168]	chloroplast thylakoid membrane [GO:0009535]; integral component of membrane [GO:0016021]; photosystem I [GO:0009522]; photosystem II [GO:0009523]	25726480
A0A0D2LMU1	A0A0D2LMU1_9CHLO	unreviewed	Flagellar associated protein	MNEG_0363	Monoraphidium neglectum			motile cilium [GO:0031514]			motile cilium [GO:0031514]	25726481
A0A0D2MYS3	A0A0D2MYS3_9CHLO	unreviewed	Uncharacterized protein	MNEG_0364	Monoraphidium neglectum							25726482
A0A0D2NTZ7	A0A0D2NTZ7_9CHLO	unreviewed	Uncharacterized protein	MNEG_0365	Monoraphidium neglectum			nucleus [GO:0005634]			nucleus [GO:0005634]	25726483
A0A0D2LMQ9	A0A0D2LMQ9_9CHLO	unreviewed	Uncharacterized protein	MNEG_0366	Monoraphidium neglectum			nucleus [GO:0005634]; chromatin organization [GO:0006325]; developmental process [GO:0032502]	chromatin organization [GO:0006325]; developmental process [GO:0032502]		nucleus [GO:0005634]	25726484
A0A0D2MYN7	A0A0D2MYN7_9CHLO	unreviewed	Uncharacterized protein	MNEG_0367	Monoraphidium neglectum							25726485
A0A0D2NTW6	A0A0D2NTW6_9CHLO	unreviewed	Uncharacterized protein	MNEG_0368	Monoraphidium neglectum							25726486
A0A0D2N5N2	A0A0D2N5N2_9CHLO	unreviewed	Uncharacterized protein	MNEG_0369	Monoraphidium neglectum							25726487
A0A0D2KBR0	A0A0D2KBR0_9CHLO	unreviewed	Beta-aspartyl-peptidase (Threonine type) (EC 3.4.19.5)	MNEG_0370	Monoraphidium neglectum			beta-aspartyl-peptidase activity [GO:0008798]		beta-aspartyl-peptidase activity [GO:0008798]		25726488
A0A0D2LMR5	A0A0D2LMR5_9CHLO	unreviewed	Isoaspartyl peptidase/L-asparaginase (EC 3.4.19.5)	MNEG_0371	Monoraphidium neglectum			beta-aspartyl-peptidase activity [GO:0008798]		beta-aspartyl-peptidase activity [GO:0008798]		25726489
A0A0D2MYP6	A0A0D2MYP6_9CHLO	unreviewed	Uncharacterized protein	MNEG_0372	Monoraphidium neglectum			oxidoreductase activity [GO:0016491]		oxidoreductase activity [GO:0016491]		25726490
A0A0D2NTX4	A0A0D2NTX4_9CHLO	unreviewed	Uncharacterized protein	MNEG_0373	Monoraphidium neglectum							25726491
A0A0D2N5N8	A0A0D2N5N8_9CHLO	unreviewed	Uncharacterized protein	MNEG_0374	Monoraphidium neglectum							25726492
A0A0D2KBS2	A0A0D2KBS2_9CHLO	unreviewed	Uncharacterized protein	MNEG_0375	Monoraphidium neglectum							25726493
A0A0D2LMS1	A0A0D2LMS1_9CHLO	unreviewed	Uncharacterized protein	MNEG_0376	Monoraphidium neglectum			integral component of membrane [GO:0016021]			integral component of membrane [GO:0016021]	25726494
A0A0D2MYQ6	A0A0D2MYQ6_9CHLO	unreviewed	Uncharacterized protein	MNEG_0377	Monoraphidium neglectum			integral component of membrane [GO:0016021]			integral component of membrane [GO:0016021]	25726495
A0A0D2NTY1	A0A0D2NTY1_9CHLO	unreviewed	Biotin carboxylase (EC 6.4.1.2)	MNEG_0378	Monoraphidium neglectum			acetyl-CoA carboxylase activity [GO:0003989]		acetyl-CoA carboxylase activity [GO:0003989]		25726496
A0A0D2LMP1	A0A0D2LMP1_9CHLO	unreviewed	Uncharacterized protein	MNEG_0379	Monoraphidium neglectum			hydrolase activity [GO:0016787]; lipid catabolic process [GO:0016042]	lipid catabolic process [GO:0016042]	hydrolase activity [GO:0016787]		25726497
A0A0D2MYL9	A0A0D2MYL9_9CHLO	unreviewed	Uncharacterized protein	MNEG_0380	Monoraphidium neglectum							25726498
A0A0D2NTV0	A0A0D2NTV0_9CHLO	unreviewed	Uncharacterized protein	MNEG_0381	Monoraphidium neglectum			integral component of membrane [GO:0016021]			integral component of membrane [GO:0016021]	25726499
A0A0D2N5M3	A0A0D2N5M3_9CHLO	unreviewed	Uncharacterized protein	MNEG_0382	Monoraphidium neglectum			periplasmic space [GO:0042597]; lyase activity [GO:0016829]		lyase activity [GO:0016829]	periplasmic space [GO:0042597]	25726500
A0A0D2KBN6	A0A0D2KBN6_9CHLO	unreviewed	Uncharacterized protein	MNEG_0383	Monoraphidium neglectum							25726501
A0A0D2LMQ0	A0A0D2LMQ0_9CHLO	unreviewed	Alanine transaminase (EC 2.6.1.2)	MNEG_0384	Monoraphidium neglectum			L-alanine:2-oxoglutarate aminotransferase activity [GO:0004021]; pyridoxal phosphate binding [GO:0030170]; biosynthetic process [GO:0009058]	biosynthetic process [GO:0009058]	L-alanine:2-oxoglutarate aminotransferase activity [GO:0004021]; pyridoxal phosphate binding [GO:0030170]		25726502
A0A0D2MYM8	A0A0D2MYM8_9CHLO	unreviewed	Tyrosine-protein kinase TXK	MNEG_0385	Monoraphidium neglectum			ATP binding [GO:0005524]; protein kinase activity [GO:0004672]		ATP binding [GO:0005524]; protein kinase activity [GO:0004672]		25726503
A0A0D2NTV8	A0A0D2NTV8_9CHLO	unreviewed	Uncharacterized protein	MNEG_0386	Monoraphidium neglectum			ATP binding [GO:0005524]; protein kinase activity [GO:0004672]		ATP binding [GO:0005524]; protein kinase activity [GO:0004672]		25726504
A0A0D2N5M6	A0A0D2N5M6_9CHLO	unreviewed	Uncharacterized protein	MNEG_0387	Monoraphidium neglectum							25726505
A0A0D2KBP7	A0A0D2KBP7_9CHLO	unreviewed	Uncharacterized protein	MNEG_0388	Monoraphidium neglectum							25726506
A0A0D2N5K5	A0A0D2N5K5_9CHLO	unreviewed	Inorganic phosphate transporter 1-9	MNEG_0389	Monoraphidium neglectum			integral component of membrane [GO:0016021]; transmembrane transporter activity [GO:0022857]		transmembrane transporter activity [GO:0022857]	integral component of membrane [GO:0016021]	25726507
A0A0D2KBJ8	A0A0D2KBJ8_9CHLO	unreviewed	Uncharacterized protein	MNEG_0390	Monoraphidium neglectum			zinc ion binding [GO:0008270]		zinc ion binding [GO:0008270]		25726508
A0A0D2LMM5	A0A0D2LMM5_9CHLO	unreviewed	Uncharacterized protein	MNEG_0391	Monoraphidium neglectum							25726509
A0A0D2MYK5	A0A0D2MYK5_9CHLO	unreviewed	Uncharacterized protein	MNEG_0392	Monoraphidium neglectum			integral component of membrane [GO:0016021]; oxidation-reduction process [GO:0055114]	oxidation-reduction process [GO:0055114]		integral component of membrane [GO:0016021]	25726510
A0A0D2NTT1	A0A0D2NTT1_9CHLO	unreviewed	Uncharacterized protein	MNEG_0393	Monoraphidium neglectum							25726511
A0A0D2N5L0	A0A0D2N5L0_9CHLO	unreviewed	Uncharacterized protein	MNEG_0394	Monoraphidium neglectum							25726512
A0A0D2KBK7	A0A0D2KBK7_9CHLO	unreviewed	Uncharacterized protein	MNEG_0395	Monoraphidium neglectum							25726513
A0A0D2LMN2	A0A0D2LMN2_9CHLO	unreviewed	Uncharacterized protein	MNEG_0396	Monoraphidium neglectum							25726514
A0A0D2MYL1	A0A0D2MYL1_9CHLO	unreviewed	Putative S-adenosyl-L-methionine-dependent methyltransferase	MNEG_0397	Monoraphidium neglectum			methyltransferase activity [GO:0008168]		methyltransferase activity [GO:0008168]		25726515
A0A0D2NTU2	A0A0D2NTU2_9CHLO	unreviewed	Uncharacterized protein	MNEG_0398	Monoraphidium neglectum			integral component of membrane [GO:0016021]			integral component of membrane [GO:0016021]	25726516
A0A0D2N5L7	A0A0D2N5L7_9CHLO	unreviewed	Uncharacterized protein	MNEG_0399	Monoraphidium neglectum							25726517
A0A0D2KBM1	A0A0D2KBM1_9CHLO	unreviewed	26S proteasome non-ATPase regulatory subunit 9	MNEG_0400	Monoraphidium neglectum			proteasome complex [GO:0000502]			proteasome complex [GO:0000502]	25726518
A0A0D2LMJ5	A0A0D2LMJ5_9CHLO	unreviewed	Uncharacterized protein	MNEG_0401	Monoraphidium neglectum			integral component of membrane [GO:0016021]			integral component of membrane [GO:0016021]	25726519
A0A0D2MYI7	A0A0D2MYI7_9CHLO	unreviewed	Uncharacterized protein	MNEG_0402	Monoraphidium neglectum							25726520
A0A0D2NTQ3	A0A0D2NTQ3_9CHLO	unreviewed	Uncharacterized protein	MNEG_0403	Monoraphidium neglectum							25726521
A0A0D2N5J0	A0A0D2N5J0_9CHLO	unreviewed	Uncharacterized protein	MNEG_0404	Monoraphidium neglectum			integral component of membrane [GO:0016021]			integral component of membrane [GO:0016021]	25726522
A0A0D2KBH9	A0A0D2KBH9_9CHLO	unreviewed	Uncharacterized protein	MNEG_0405	Monoraphidium neglectum			integral component of membrane [GO:0016021]			integral component of membrane [GO:0016021]	25726523
A0A0D2LMK3	A0A0D2LMK3_9CHLO	unreviewed	Uncharacterized protein	MNEG_0406	Monoraphidium neglectum			N-acetyltransferase activity [GO:0008080]		N-acetyltransferase activity [GO:0008080]		25726524
A0A0D2MYJ3	A0A0D2MYJ3_9CHLO	unreviewed	Uncharacterized protein	MNEG_0407	Monoraphidium neglectum							25726525
A0A0D2NTR4	A0A0D2NTR4_9CHLO	unreviewed	Uncharacterized protein	MNEG_0408	Monoraphidium neglectum			starch binding [GO:2001070]		starch binding [GO:2001070]		25726526
A0A0D2N5J7	A0A0D2N5J7_9CHLO	unreviewed	Rubredoxin	MNEG_0409	Monoraphidium neglectum			iron ion binding [GO:0005506]		iron ion binding [GO:0005506]		25726527
A0A0D2KBI9	A0A0D2KBI9_9CHLO	unreviewed	Uncharacterized protein	MNEG_0410	Monoraphidium neglectum			Golgi membrane [GO:0000139]; integral component of membrane [GO:0016021]; sugar:proton symporter activity [GO:0005351]		sugar:proton symporter activity [GO:0005351]	Golgi membrane [GO:0000139]; integral component of membrane [GO:0016021]	25726528
A0A0D2LML6	A0A0D2LML6_9CHLO	unreviewed	Uncharacterized protein	MNEG_0411	Monoraphidium neglectum			Ino80 complex [GO:0031011]; chromatin remodeling [GO:0006338]; regulation of transcription, DNA-templated [GO:0006355]	chromatin remodeling [GO:0006338]; regulation of transcription, DNA-templated [GO:0006355]		Ino80 complex [GO:0031011]	25726529
A0A0D2MYJ9	A0A0D2MYJ9_9CHLO	unreviewed	Uncharacterized protein	MNEG_0412	Monoraphidium neglectum							25726530
A0A0D2NTS2	A0A0D2NTS2_9CHLO	unreviewed	Uncharacterized protein	MNEG_0413	Monoraphidium neglectum							25726531
A0A0D2MYG6	A0A0D2MYG6_9CHLO	unreviewed	Cell division protease FtsH (EC 3.4.24.-)	MNEG_0414	Monoraphidium neglectum			peptidase activity [GO:0008233]; cell division [GO:0051301]	cell division [GO:0051301]	peptidase activity [GO:0008233]		25726532
A0A0D2NTN4	A0A0D2NTN4_9CHLO	unreviewed	Microspherule protein 1	MNEG_0415	Monoraphidium neglectum							25726533
A0A0D2N5G5	A0A0D2N5G5_9CHLO	unreviewed	Aldose 1-epimerase (EC 4.2.1.9)	MNEG_0416	Monoraphidium neglectum			carbohydrate binding [GO:0030246]; dihydroxy-acid dehydratase activity [GO:0004160]; isomerase activity [GO:0016853]; carbohydrate metabolic process [GO:0005975]	carbohydrate metabolic process [GO:0005975]	carbohydrate binding [GO:0030246]; dihydroxy-acid dehydratase activity [GO:0004160]; isomerase activity [GO:0016853]		25726534
A0A0D2KBE8	A0A0D2KBE8_9CHLO	unreviewed	Uncharacterized protein	MNEG_0417	Monoraphidium neglectum			calcium ion binding [GO:0005509]		calcium ion binding [GO:0005509]		25726535
A0A0D2LMH8	A0A0D2LMH8_9CHLO	unreviewed	Adenosine deaminase (EC 3.5.4.4)	MNEG_0418	Monoraphidium neglectum			adenine deaminase activity [GO:0000034]; adenosine deaminase activity [GO:0004000]; adenine catabolic process [GO:0006146]	adenine catabolic process [GO:0006146]	adenine deaminase activity [GO:0000034]; adenosine deaminase activity [GO:0004000]		25726536
A0A0D2MYH3	A0A0D2MYH3_9CHLO	unreviewed	Adenosine deaminase (EC 3.5.4.4)	MNEG_0419	Monoraphidium neglectum			adenine deaminase activity [GO:0000034]; adenosine deaminase activity [GO:0004000]; adenine catabolic process [GO:0006146]	adenine catabolic process [GO:0006146]	adenine deaminase activity [GO:0000034]; adenosine deaminase activity [GO:0004000]		25726537
A0A0D2NTP2	A0A0D2NTP2_9CHLO	unreviewed	Uncharacterized protein	MNEG_0420	Monoraphidium neglectum			integral component of membrane [GO:0016021]			integral component of membrane [GO:0016021]	25726538
A0A0D2N5H2	A0A0D2N5H2_9CHLO	unreviewed	Uncharacterized protein	MNEG_0421	Monoraphidium neglectum			transcription factor activity, sequence-specific DNA binding [GO:0003700]		transcription factor activity, sequence-specific DNA binding [GO:0003700]		25726539
A0A0D2KBF9	A0A0D2KBF9_9CHLO	unreviewed	Uncharacterized protein	MNEG_0422	Monoraphidium neglectum							25726540
A0A0D2LMI6	A0A0D2LMI6_9CHLO	unreviewed	Uncharacterized protein	MNEG_0423	Monoraphidium neglectum							25726541
A0A0D2MYI1	A0A0D2MYI1_9CHLO	unreviewed	Uncharacterized protein	MNEG_0424	Monoraphidium neglectum							25726542
A0A0D2NTP6	A0A0D2NTP6_9CHLO	unreviewed	Cleavage and polyadenylation specificity factor subunit 3 (EC 3.1.27.-)	MNEG_0425	Monoraphidium neglectum			hydrolase activity [GO:0016787]		hydrolase activity [GO:0016787]		25726543
A0A0D2KBH0	A0A0D2KBH0_9CHLO	unreviewed	Uncharacterized protein	MNEG_0427	Monoraphidium neglectum			integral component of membrane [GO:0016021]			integral component of membrane [GO:0016021]	25726545
A0A0D2MYF1	A0A0D2MYF1_9CHLO	unreviewed	Flagellar radial spoke protein 3	MNEG_0428	Monoraphidium neglectum			motile cilium [GO:0031514]			motile cilium [GO:0031514]	25726546
A0A0D2NTM2	A0A0D2NTM2_9CHLO	unreviewed	Histidyl-tRNA synthetase (EC 6.1.1.21)	MNEG_0429	Monoraphidium neglectum			cytoplasm [GO:0005737]; ATP binding [GO:0005524]; histidine-tRNA ligase activity [GO:0004821]; histidyl-tRNA aminoacylation [GO:0006427]	histidyl-tRNA aminoacylation [GO:0006427]	ATP binding [GO:0005524]; histidine-tRNA ligase activity [GO:0004821]	cytoplasm [GO:0005737]	25726547
A0A0D2N5E8	A0A0D2N5E8_9CHLO	unreviewed	Uncharacterized protein	MNEG_0430	Monoraphidium neglectum							25726548
A0A0D2KBD4	A0A0D2KBD4_9CHLO	unreviewed	Uncharacterized protein	MNEG_0431	Monoraphidium neglectum							25726549
A0A0D2LMG8	A0A0D2LMG8_9CHLO	unreviewed	Putative Parkin coregulated like protein	MNEG_0432	Monoraphidium neglectum							25726550
A0A0D2MYF8	A0A0D2MYF8_9CHLO	unreviewed	Homoserine kinase (EC 2.7.1.39)	MNEG_0433	Monoraphidium neglectum			ATP binding [GO:0005524]; homoserine kinase activity [GO:0004413]; threonine metabolic process [GO:0006566]	threonine metabolic process [GO:0006566]	ATP binding [GO:0005524]; homoserine kinase activity [GO:0004413]		25726551
A0A0D2NTM9	A0A0D2NTM9_9CHLO	unreviewed	Uncharacterized protein	MNEG_0434	Monoraphidium neglectum			integral component of membrane [GO:0016021]			integral component of membrane [GO:0016021]	25726552
A0A0D2N5F7	A0A0D2N5F7_9CHLO	unreviewed	Uncharacterized protein	MNEG_0435	Monoraphidium neglectum							25726553
A0A0D2KBE2	A0A0D2KBE2_9CHLO	unreviewed	Uncharacterized protein	MNEG_0436	Monoraphidium neglectum							25726554
A0A0D2LMH3	A0A0D2LMH3_9CHLO	unreviewed	Uncharacterized protein	MNEG_0437	Monoraphidium neglectum							25726555
A0A0D2LME8	A0A0D2LME8_9CHLO	unreviewed	Isocitrate dehydrogenase (NAD+) (EC 1.1.1.41)	MNEG_0438	Monoraphidium neglectum			isocitrate dehydrogenase (NAD+) activity [GO:0004449]		isocitrate dehydrogenase (NAD+) activity [GO:0004449]		25726556
A0A0D2MYE0	A0A0D2MYE0_9CHLO	unreviewed	Uncharacterized protein	MNEG_0439	Monoraphidium neglectum			ATP binding [GO:0005524]; protein kinase activity [GO:0004672]		ATP binding [GO:0005524]; protein kinase activity [GO:0004672]		25726557
A0A0D2NTL1	A0A0D2NTL1_9CHLO	unreviewed	Uncharacterized protein	MNEG_0440	Monoraphidium neglectum							25726558
A0A0D2N5D4	A0A0D2N5D4_9CHLO	unreviewed	Translation initiation factor IF-3	MNEG_0441	Monoraphidium neglectum			translation initiation factor activity [GO:0003743]		translation initiation factor activity [GO:0003743]		25726559
A0A0D2KBC0	A0A0D2KBC0_9CHLO	unreviewed	Uncharacterized protein	MNEG_0442	Monoraphidium neglectum							25726560
A0A0D2LMF7	A0A0D2LMF7_9CHLO	unreviewed	Uncharacterized protein	MNEG_0443	Monoraphidium neglectum			integral component of membrane [GO:0016021]; transmembrane transport [GO:0055085]	transmembrane transport [GO:0055085]		integral component of membrane [GO:0016021]	25726561
A0A0D2MYE4	A0A0D2MYE4_9CHLO	unreviewed	Phosducin-like protein 3	MNEG_0444	Monoraphidium neglectum							25726562
A0A0D2NTL5	A0A0D2NTL5_9CHLO	unreviewed	Uncharacterized protein	MNEG_0445	Monoraphidium neglectum							25726563
A0A0D2N5E0	A0A0D2N5E0_9CHLO	unreviewed	40S ribosomal protein S19-1	MNEG_0446	Monoraphidium neglectum			ribosome [GO:0005840]; structural constituent of ribosome [GO:0003735]; translation [GO:0006412]	translation [GO:0006412]	structural constituent of ribosome [GO:0003735]	ribosome [GO:0005840]	25726564
A0A0D2KBC8	A0A0D2KBC8_9CHLO	unreviewed	Coiled-coil domain-containing protein 65	MNEG_0447	Monoraphidium neglectum							25726565
A0A0D2LMG2	A0A0D2LMG2_9CHLO	unreviewed	Transcription factor MYB98	MNEG_0448	Monoraphidium neglectum			DNA binding [GO:0003677]		DNA binding [GO:0003677]		25726566
A0A0D2N5C5	A0A0D2N5C5_9CHLO	unreviewed	Uncharacterized protein	MNEG_0449	Monoraphidium neglectum							25726567
A0A0D2KBA8	A0A0D2KBA8_9CHLO	unreviewed	DNA methyltransferase 1-associated protein	MNEG_0450	Monoraphidium neglectum			NuA4 histone acetyltransferase complex [GO:0035267]; methyltransferase activity [GO:0008168]; chromatin remodeling [GO:0006338]; DNA repair [GO:0006281]; histone H2A acetylation [GO:0043968]; histone H4 acetylation [GO:0043967]	chromatin remodeling [GO:0006338]; DNA repair [GO:0006281]; histone H2A acetylation [GO:0043968]; histone H4 acetylation [GO:0043967]	methyltransferase activity [GO:0008168]	NuA4 histone acetyltransferase complex [GO:0035267]	25726568
A0A0D2LMD9	A0A0D2LMD9_9CHLO	unreviewed	Uncharacterized protein	MNEG_0451	Monoraphidium neglectum			ATP binding [GO:0005524]; protein kinase activity [GO:0004672]		ATP binding [GO:0005524]; protein kinase activity [GO:0004672]		25726569
A0A0D2MYD6	A0A0D2MYD6_9CHLO	unreviewed	NAD+ synthase (Glutamine-hydrolysing) (EC 6.3.5.1)	MNEG_0452	Monoraphidium neglectum			ATP binding [GO:0005524]; hydrolase activity, acting on carbon-nitrogen (but not peptide) bonds [GO:0016810]; NAD+ synthase (glutamine-hydrolyzing) activity [GO:0003952]; NAD biosynthetic process [GO:0009435]	NAD biosynthetic process [GO:0009435]	ATP binding [GO:0005524]; hydrolase activity, acting on carbon-nitrogen (but not peptide) bonds [GO:0016810]; NAD+ synthase (glutamine-hydrolyzing) activity [GO:0003952]		25726570
A0A0D2NTK4	A0A0D2NTK4_9CHLO	unreviewed	Uncharacterized protein	MNEG_0453	Monoraphidium neglectum			integral component of membrane [GO:0016021]			integral component of membrane [GO:0016021]	25726571
A0A0D2N5D1	A0A0D2N5D1_9CHLO	unreviewed	Uncharacterized protein	MNEG_0454	Monoraphidium neglectum							25726572
A0A0D2KBB3	A0A0D2KBB3_9CHLO	unreviewed	X-Pro aminopeptidase (EC 3.4.11.9)	MNEG_0455	Monoraphidium neglectum			metal ion binding [GO:0046872]; metalloaminopeptidase activity [GO:0070006]		metal ion binding [GO:0046872]; metalloaminopeptidase activity [GO:0070006]		25726573
A0A0D2KB96	A0A0D2KB96_9CHLO	unreviewed	Uncharacterized protein	MNEG_0456	Monoraphidium neglectum							25726574
A0A0D2LMC1	A0A0D2LMC1_9CHLO	unreviewed	Uncharacterized protein	MNEG_0457	Monoraphidium neglectum			integral component of membrane [GO:0016021]			integral component of membrane [GO:0016021]	25726575
A0A0D2MYC6	A0A0D2MYC6_9CHLO	unreviewed	Uncharacterized protein	MNEG_0458	Monoraphidium neglectum							25726576
A0A0D2NTI9	A0A0D2NTI9_9CHLO	unreviewed	Uncharacterized protein	MNEG_0459	Monoraphidium neglectum			integral component of membrane [GO:0016021]; oxidoreductase activity [GO:0016491]		oxidoreductase activity [GO:0016491]	integral component of membrane [GO:0016021]	25726577
A0A0D2N5C2	A0A0D2N5C2_9CHLO	unreviewed	Uncharacterized protein	MNEG_0460	Monoraphidium neglectum							25726578
A0A0D2KBA4	A0A0D2KBA4_9CHLO	unreviewed	Uncharacterized protein	MNEG_0461	Monoraphidium neglectum			integral component of membrane [GO:0016021]			integral component of membrane [GO:0016021]	25726579
A0A0D2LMC9	A0A0D2LMC9_9CHLO	unreviewed	ATP-dependent Clp protease ATP-binding subunit ClpC	MNEG_0462	Monoraphidium neglectum			ATP binding [GO:0005524]; peptidase activity [GO:0008233]		ATP binding [GO:0005524]; peptidase activity [GO:0008233]		25726580
A0A0D2MYD0	A0A0D2MYD0_9CHLO	unreviewed	Putative plastid-lipid-associated protein 6	MNEG_0463	Monoraphidium neglectum							25726581
A0A0D2NTJ7	A0A0D2NTJ7_9CHLO	unreviewed	Nuclear/nucleolar GTPase 2	MNEG_0464	Monoraphidium neglectum			nucleolus [GO:0005730]; GTP binding [GO:0005525]; hydrolase activity [GO:0016787]		GTP binding [GO:0005525]; hydrolase activity [GO:0016787]	nucleolus [GO:0005730]	25726582
A0A0D2KB83	A0A0D2KB83_9CHLO	unreviewed	DNA excision repair protein ERCC-6 (EC 3.6.1.-)	MNEG_0465	Monoraphidium neglectum			hydrolase activity [GO:0016787]		hydrolase activity [GO:0016787]		25726583
A0A0D2LMB2	A0A0D2LMB2_9CHLO	unreviewed	Putative DNA repair and recombination protein RAD26-like protein	MNEG_0466	Monoraphidium neglectum			ATP binding [GO:0005524]		ATP binding [GO:0005524]		25726584
A0A0D2MYB8	A0A0D2MYB8_9CHLO	unreviewed	Uncharacterized protein	MNEG_0467	Monoraphidium neglectum							25726585
A0A0D2NTH6	A0A0D2NTH6_9CHLO	unreviewed	Lysosomal Pro-X carboxypeptidase (EC 3.4.14.2)	MNEG_0468	Monoraphidium neglectum			carboxypeptidase activity [GO:0004180]; serine-type peptidase activity [GO:0008236]		carboxypeptidase activity [GO:0004180]; serine-type peptidase activity [GO:0008236]		25726586
A0A0D2N5B3	A0A0D2N5B3_9CHLO	unreviewed	Uncharacterized protein	MNEG_0469	Monoraphidium neglectum							25726587
A0A0D2KB87	A0A0D2KB87_9CHLO	unreviewed	Uncharacterized protein	MNEG_0470	Monoraphidium neglectum			glutamate-ammonia ligase activity [GO:0004356]; nitrogen compound metabolic process [GO:0006807]	nitrogen compound metabolic process [GO:0006807]	glutamate-ammonia ligase activity [GO:0004356]		25726588
A0A0D2LMB6	A0A0D2LMB6_9CHLO	unreviewed	Uncharacterized protein	MNEG_0471	Monoraphidium neglectum			cysteine-type peptidase activity [GO:0008234]		cysteine-type peptidase activity [GO:0008234]		25726589
A0A0D2MYC2	A0A0D2MYC2_9CHLO	unreviewed	Uncharacterized protein	MNEG_0472	Monoraphidium neglectum							25726590
A0A0D2NTI3	A0A0D2NTI3_9CHLO	unreviewed	Uncharacterized protein	MNEG_0473	Monoraphidium neglectum							25726591
A0A0D2N5B7	A0A0D2N5B7_9CHLO	unreviewed	Uncharacterized protein	MNEG_0474	Monoraphidium neglectum							25726592
A0A0D2MYA4	A0A0D2MYA4_9CHLO	unreviewed	1-deoxy-D-xylulose-5-phosphate synthase (EC 2.2.1.7)	MNEG_0475	Monoraphidium neglectum			1-deoxy-D-xylulose-5-phosphate synthase activity [GO:0008661]; terpenoid biosynthetic process [GO:0016114]	terpenoid biosynthetic process [GO:0016114]	1-deoxy-D-xylulose-5-phosphate synthase activity [GO:0008661]		25726593
A0A0D2NTF2	A0A0D2NTF2_9CHLO	unreviewed	Uncharacterized protein	MNEG_0476	Monoraphidium neglectum							25726594
A0A0D2N593	A0A0D2N593_9CHLO	unreviewed	Uncharacterized protein	MNEG_0477	Monoraphidium neglectum			integral component of membrane [GO:0016021]			integral component of membrane [GO:0016021]	25726595
A0A0D2KB69	A0A0D2KB69_9CHLO	unreviewed	Peptidase S8/S53 subtilisin kexin sedolisin (EC 3.4.21.62)	MNEG_0478	Monoraphidium neglectum			serine-type endopeptidase activity [GO:0004252]		serine-type endopeptidase activity [GO:0004252]		25726596
A0A0D2LMA2	A0A0D2LMA2_9CHLO	unreviewed	Uncharacterized protein	MNEG_0479	Monoraphidium neglectum			integral component of membrane [GO:0016021]			integral component of membrane [GO:0016021]	25726597
A0A0D2MYA7	A0A0D2MYA7_9CHLO	unreviewed	Phenylalanyl-tRNA synthetase alphachain (EC 6.1.1.20)	MNEG_0480	Monoraphidium neglectum			cytoplasm [GO:0005737]; ATP binding [GO:0005524]; phenylalanine-tRNA ligase activity [GO:0004826]; tRNA binding [GO:0000049]; phenylalanyl-tRNA aminoacylation [GO:0006432]	phenylalanyl-tRNA aminoacylation [GO:0006432]	ATP binding [GO:0005524]; phenylalanine-tRNA ligase activity [GO:0004826]; tRNA binding [GO:0000049]	cytoplasm [GO:0005737]	25726598
A0A0D2NTG2	A0A0D2NTG2_9CHLO	unreviewed	Activator heat shock protein ATPase	MNEG_0481	Monoraphidium neglectum			ATPase activator activity [GO:0001671]; chaperone binding [GO:0051087]; response to stress [GO:0006950]	response to stress [GO:0006950]	ATPase activator activity [GO:0001671]; chaperone binding [GO:0051087]		25726599
A0A0D2N599	A0A0D2N599_9CHLO	unreviewed	Early light-inducible protein	MNEG_0482	Monoraphidium neglectum							25726600
A0A0D2KB76	A0A0D2KB76_9CHLO	unreviewed	Flavin-containing monooxygenase (EC 1.-.-.-)	MNEG_0483	Monoraphidium neglectum			flavin adenine dinucleotide binding [GO:0050660]; N,N-dimethylaniline monooxygenase activity [GO:0004499]; NADP binding [GO:0050661]		flavin adenine dinucleotide binding [GO:0050660]; N,N-dimethylaniline monooxygenase activity [GO:0004499]; NADP binding [GO:0050661]		25726601
A0A0D2LMA7	A0A0D2LMA7_9CHLO	unreviewed	Structure-specific endonuclease subunit SLX1 homolog (EC 3.1.-.-)	MNEG_0484	Monoraphidium neglectum			Slx1-Slx4 complex [GO:0033557]; 5'-flap endonuclease activity [GO:0017108]; DNA recombination [GO:0006310]; DNA repair [GO:0006281]	DNA recombination [GO:0006310]; DNA repair [GO:0006281]	5'-flap endonuclease activity [GO:0017108]	Slx1-Slx4 complex [GO:0033557]	25726602
A0A0D2MYB2	A0A0D2MYB2_9CHLO	unreviewed	Uncharacterized protein	MNEG_0485	Monoraphidium neglectum							25726603
A0A0D2NTG8	A0A0D2NTG8_9CHLO	unreviewed	Nuclear prelamin A recognition factor-like protein	MNEG_0486	Monoraphidium neglectum							25726604
A0A0D2N5A7	A0A0D2N5A7_9CHLO	unreviewed	Uncharacterized protein (Fragment)	MNEG_0487	Monoraphidium neglectum							25726605
A0A0D2LM90	A0A0D2LM90_9CHLO	unreviewed	Uncharacterized protein (Fragment)	MNEG_0488	Monoraphidium neglectum							25726606
A0A0D2MYA1	A0A0D2MYA1_9CHLO	unreviewed	Uncharacterized protein	MNEG_0489	Monoraphidium neglectum							25726607
A0A0D2NTE5	A0A0D2NTE5_9CHLO	unreviewed	Dynein heavy chain 6, axonemal	MNEG_0490	Monoraphidium neglectum			axoneme [GO:0005930]; dynein complex [GO:0030286]; integral component of membrane [GO:0016021]; microtubule motor activity [GO:0003777]; microtubule-based movement [GO:0007018]	microtubule-based movement [GO:0007018]	microtubule motor activity [GO:0003777]	axoneme [GO:0005930]; dynein complex [GO:0030286]; integral component of membrane [GO:0016021]	25726608
A0A0D2N588	A0A0D2N588_9CHLO	unreviewed	Dynein heavy chain 1, axonemal	MNEG_0491	Monoraphidium neglectum			axoneme [GO:0005930]; microtubule motor activity [GO:0003777]; microtubule-based movement [GO:0007018]	microtubule-based movement [GO:0007018]	microtubule motor activity [GO:0003777]	axoneme [GO:0005930]	25726609
A0A0D2KB63	A0A0D2KB63_9CHLO	unreviewed	Uncharacterized protein	MNEG_0492	Monoraphidium neglectum			nucleic acid binding [GO:0003676]; zinc ion binding [GO:0008270]		nucleic acid binding [GO:0003676]; zinc ion binding [GO:0008270]		25726610
A0A0D2LM95	A0A0D2LM95_9CHLO	unreviewed	Uncharacterized protein	MNEG_0493	Monoraphidium neglectum							25726611
A0A0D2MY89	A0A0D2MY89_9CHLO	unreviewed	Putative ATP-dependent RNA helicase DHX36 (EC 3.6.1.-)	MNEG_0494	Monoraphidium neglectum			ATP binding [GO:0005524]; helicase activity [GO:0004386]; nucleic acid binding [GO:0003676]		ATP binding [GO:0005524]; helicase activity [GO:0004386]; nucleic acid binding [GO:0003676]		25726612
A0A0D2NTC6	A0A0D2NTC6_9CHLO	unreviewed	Putative ATP-dependent RNA helicase DHX57 (EC 3.6.1.-)	MNEG_0495	Monoraphidium neglectum			helicase activity [GO:0004386]		helicase activity [GO:0004386]		25726613
A0A0D2N569	A0A0D2N569_9CHLO	unreviewed	Uncharacterized protein	MNEG_0496	Monoraphidium neglectum							25726614
A0A0D2KB45	A0A0D2KB45_9CHLO	unreviewed	Uncharacterized protein	MNEG_0497	Monoraphidium neglectum			catalytic activity [GO:0003824]		catalytic activity [GO:0003824]		25726615
A0A0D2LM79	A0A0D2LM79_9CHLO	unreviewed	Uncharacterized protein	MNEG_0498	Monoraphidium neglectum			integral component of membrane [GO:0016021]			integral component of membrane [GO:0016021]	25726616
A0A0D2MY94	A0A0D2MY94_9CHLO	unreviewed	Uncharacterized protein	MNEG_0499	Monoraphidium neglectum							25726617
A0A0D2NTD2	A0A0D2NTD2_9CHLO	unreviewed	Uncharacterized protein	MNEG_0500	Monoraphidium neglectum			membrane [GO:0016020]			membrane [GO:0016020]	25726618
A0A0D2N575	A0A0D2N575_9CHLO	unreviewed	Ubiquitin-conjugating enzyme E2 S (EC 6.3.2.19)	MNEG_0501	Monoraphidium neglectum			ATP binding [GO:0005524]; ligase activity [GO:0016874]		ATP binding [GO:0005524]; ligase activity [GO:0016874]		25726619
A0A0D2KB50	A0A0D2KB50_9CHLO	unreviewed	Uncharacterized protein	MNEG_0502	Monoraphidium neglectum							25726620
A0A0D2LM85	A0A0D2LM85_9CHLO	unreviewed	Uncharacterized protein	MNEG_0503	Monoraphidium neglectum							25726621
A0A0D2MY98	A0A0D2MY98_9CHLO	unreviewed	Uncharacterized protein	MNEG_0504	Monoraphidium neglectum							25726622
A0A0D2NTD7	A0A0D2NTD7_9CHLO	unreviewed	Uncharacterized protein	MNEG_0505	Monoraphidium neglectum							25726623
A0A0D2N581	A0A0D2N581_9CHLO	unreviewed	Uncharacterized protein	MNEG_0506	Monoraphidium neglectum			metal ion binding [GO:0046872]		metal ion binding [GO:0046872]		25726624
A0A0D2KB58	A0A0D2KB58_9CHLO	unreviewed	Uncharacterized protein (Fragment)	MNEG_0507	Monoraphidium neglectum							25726625
A0A0D2LM62	A0A0D2LM62_9CHLO	unreviewed	Uncharacterized protein	MNEG_0508	Monoraphidium neglectum							25726626
A0A0D2MY79	A0A0D2MY79_9CHLO	unreviewed	Aldo/keto reductase family protein (EC 1.1.1.21)	MNEG_0509	Monoraphidium neglectum			alditol:NADP+ 1-oxidoreductase activity [GO:0004032]		alditol:NADP+ 1-oxidoreductase activity [GO:0004032]		25726627
A0A0D2NTB0	A0A0D2NTB0_9CHLO	unreviewed	Aldo/keto reductase family (EC 1.1.1.21)	MNEG_0510	Monoraphidium neglectum			alditol:NADP+ 1-oxidoreductase activity [GO:0004032]		alditol:NADP+ 1-oxidoreductase activity [GO:0004032]		25726628
A0A0D2N556	A0A0D2N556_9CHLO	unreviewed	Protein DETOXIFICATION (Multidrug and toxic compound extrusion protein)	MNEG_0511	Monoraphidium neglectum			integral component of membrane [GO:0016021]; antiporter activity [GO:0015297]; drug transmembrane transporter activity [GO:0015238]		antiporter activity [GO:0015297]; drug transmembrane transporter activity [GO:0015238]	integral component of membrane [GO:0016021]	25726629
A0A0D2KB32	A0A0D2KB32_9CHLO	unreviewed	Uncharacterized protein	MNEG_0512	Monoraphidium neglectum			integral component of membrane [GO:0016021]; transmembrane transport [GO:0055085]	transmembrane transport [GO:0055085]		integral component of membrane [GO:0016021]	25726630
A0A0D2LM69	A0A0D2LM69_9CHLO	unreviewed	Uncharacterized protein	MNEG_0513	Monoraphidium neglectum							25726631
A0A0D2MY84	A0A0D2MY84_9CHLO	unreviewed	Thioredoxin-like protein	MNEG_0514	Monoraphidium neglectum			cell [GO:0005623]; protein disulfide oxidoreductase activity [GO:0015035]; cell redox homeostasis [GO:0045454]; glycerol ether metabolic process [GO:0006662]	cell redox homeostasis [GO:0045454]; glycerol ether metabolic process [GO:0006662]	protein disulfide oxidoreductase activity [GO:0015035]	cell [GO:0005623]	25726632
A0A0D2NTB7	A0A0D2NTB7_9CHLO	unreviewed	Uncharacterized protein	MNEG_0515	Monoraphidium neglectum							25726633
A0A0D2N562	A0A0D2N562_9CHLO	unreviewed	Protein cbbY, chromosomal	MNEG_0516	Monoraphidium neglectum			hydrolase activity [GO:0016787]; metabolic process [GO:0008152]	metabolic process [GO:0008152]	hydrolase activity [GO:0016787]		25726634
A0A0D2KB37	A0A0D2KB37_9CHLO	unreviewed	Uncharacterized protein	MNEG_0517	Monoraphidium neglectum			catalytic activity [GO:0003824]		catalytic activity [GO:0003824]		25726635
A0A0D2LM74	A0A0D2LM74_9CHLO	unreviewed	Uncharacterized protein	MNEG_0518	Monoraphidium neglectum							25726636
A0A0D2N538	A0A0D2N538_9CHLO	unreviewed	Uncharacterized protein (Fragment)	MNEG_0519	Monoraphidium neglectum			nuclear chromosome [GO:0000228]; chromatin remodeling [GO:0006338]	chromatin remodeling [GO:0006338]		nuclear chromosome [GO:0000228]	25726637
A0A0D2KB13	A0A0D2KB13_9CHLO	unreviewed	Uncharacterized protein	MNEG_0520	Monoraphidium neglectum							25726638
A0A0D2LM50	A0A0D2LM50_9CHLO	unreviewed	Putative Serine/threonine-protein kinase SNT7 (EC 2.7.11.1)	MNEG_0521	Monoraphidium neglectum			ATP binding [GO:0005524]; protein kinase activity [GO:0004672]		ATP binding [GO:0005524]; protein kinase activity [GO:0004672]		25726639
A0A0D2MY70	A0A0D2MY70_9CHLO	unreviewed	Uncharacterized protein	MNEG_0522	Monoraphidium neglectum							25726640
A0A0D2NT97	A0A0D2NT97_9CHLO	unreviewed	Uncharacterized protein	MNEG_0523	Monoraphidium neglectum							25726641
A0A0D2N545	A0A0D2N545_9CHLO	unreviewed	Uncharacterized protein	MNEG_0524	Monoraphidium neglectum							25726642
A0A0D2KB17	A0A0D2KB17_9CHLO	unreviewed	S-acyltransferase (EC 2.3.1.225) (Palmitoyltransferase)	MNEG_0525	Monoraphidium neglectum		CATALYTIC ACTIVITY: Palmitoyl-CoA + [protein]-L-cysteine = [protein]-S-palmitoyl-L-cysteine + CoA. {ECO:0000256|RuleBase:RU079119}.	integral component of membrane [GO:0016021]; protein-cysteine S-palmitoyltransferase activity [GO:0019706]		protein-cysteine S-palmitoyltransferase activity [GO:0019706]	integral component of membrane [GO:0016021]	25726643
A0A0D2LM54	A0A0D2LM54_9CHLO	unreviewed	Photosystem I reaction center subunit N	MNEG_0526	Monoraphidium neglectum			photosystem I [GO:0009522]; photosynthesis [GO:0015979]	photosynthesis [GO:0015979]		photosystem I [GO:0009522]	25726644
A0A0D2MY74	A0A0D2MY74_9CHLO	unreviewed	Uncharacterized protein	MNEG_0527	Monoraphidium neglectum			integral component of membrane [GO:0016021]			integral component of membrane [GO:0016021]	25726645
A0A0D2NTA4	A0A0D2NTA4_9CHLO	unreviewed	Uncharacterized protein	MNEG_0528	Monoraphidium neglectum			integral component of membrane [GO:0016021]; ATP binding [GO:0005524]; ATPase activity [GO:0016887]; transporter activity [GO:0005215]		ATPase activity [GO:0016887]; ATP binding [GO:0005524]; transporter activity [GO:0005215]	integral component of membrane [GO:0016021]	25726646
A0A0D2N551	A0A0D2N551_9CHLO	unreviewed	Uncharacterized protein	MNEG_0529	Monoraphidium neglectum							25726647
A0A0D2KB24	A0A0D2KB24_9CHLO	unreviewed	Uncharacterized protein	MNEG_0530	Monoraphidium neglectum			nucleus [GO:0005634]; negative regulation of transcription, DNA-templated [GO:0045892]	negative regulation of transcription, DNA-templated [GO:0045892]		nucleus [GO:0005634]	25726648
A0A0D2MY61	A0A0D2MY61_9CHLO	unreviewed	Dynein heavy chain 17, axonemal	MNEG_0531	Monoraphidium neglectum			microtubule motor activity [GO:0003777]; microtubule-based movement [GO:0007018]	microtubule-based movement [GO:0007018]	microtubule motor activity [GO:0003777]		25726649
A0A0D2NT83	A0A0D2NT83_9CHLO	unreviewed	Dynein heavy chain 7, axonemal	MNEG_0532	Monoraphidium neglectum			microtubule motor activity [GO:0003777]; microtubule-based movement [GO:0007018]	microtubule-based movement [GO:0007018]	microtubule motor activity [GO:0003777]		25726650
A0A0D2N533	A0A0D2N533_9CHLO	unreviewed	Dynein heavy chain 7, axonemal	MNEG_0533	Monoraphidium neglectum			microtubule motor activity [GO:0003777]; microtubule-based movement [GO:0007018]	microtubule-based movement [GO:0007018]	microtubule motor activity [GO:0003777]		25726651
A0A0D2KB07	A0A0D2KB07_9CHLO	unreviewed	Dynein heavy chain 9	MNEG_0534	Monoraphidium neglectum							25726652
A0A0D2LM44	A0A0D2LM44_9CHLO	unreviewed	Uncharacterized protein	MNEG_0535	Monoraphidium neglectum							25726653
A0A0D2MY65	A0A0D2MY65_9CHLO	unreviewed	Cytochrome P450 (EC 1.14.14.1)	MNEG_0536	Monoraphidium neglectum			aromatase activity [GO:0070330]; heme binding [GO:0020037]; iron ion binding [GO:0005506]		aromatase activity [GO:0070330]; heme binding [GO:0020037]; iron ion binding [GO:0005506]		25726654
A0A0D2NT90	A0A0D2NT90_9CHLO	unreviewed	Putative serine/threonine-protein kinase gdt8	MNEG_0537	Monoraphidium neglectum			ATP binding [GO:0005524]; protein kinase activity [GO:0004672]		ATP binding [GO:0005524]; protein kinase activity [GO:0004672]		25726655
A0A0D2N515	A0A0D2N515_9CHLO	unreviewed	Uncharacterized protein	MNEG_0538	Monoraphidium neglectum			nucleus [GO:0005634]; DNA binding [GO:0003677]; transcription factor activity, sequence-specific DNA binding [GO:0003700]; multicellular organism development [GO:0007275]; transcription, DNA-templated [GO:0006351]	multicellular organism development [GO:0007275]; transcription, DNA-templated [GO:0006351]	DNA binding [GO:0003677]; transcription factor activity, sequence-specific DNA binding [GO:0003700]	nucleus [GO:0005634]	25726656
A0A0D2KAY8	A0A0D2KAY8_9CHLO	unreviewed	tRNA(5-methylaminomethyl-2-thiouridylate)-methyltransferase (EC 2.1.1.61)	MNEG_0539	Monoraphidium neglectum			sulfurtransferase activity [GO:0016783]; tRNA (5-methylaminomethyl-2-thiouridylate)-methyltransferase activity [GO:0004808]		sulfurtransferase activity [GO:0016783]; tRNA (5-methylaminomethyl-2-thiouridylate)-methyltransferase activity [GO:0004808]		25726657
A0A0D2LM26	A0A0D2LM26_9CHLO	unreviewed	Uncharacterized protein	MNEG_0540	Monoraphidium neglectum							25726658
A0A0D2MY48	A0A0D2MY48_9CHLO	unreviewed	Uncharacterized protein	MNEG_0541	Monoraphidium neglectum							25726659
A0A0D2NT69	A0A0D2NT69_9CHLO	unreviewed	Uncharacterized protein	MNEG_0542	Monoraphidium neglectum			integral component of membrane [GO:0016021]			integral component of membrane [GO:0016021]	25726660
A0A0D2N521	A0A0D2N521_9CHLO	unreviewed	Threonylcarbamoyl-AMP synthase (TC-AMP synthase) (EC 2.7.7.87) (L-threonylcarbamoyladenylate synthase)	MNEG_0543	Monoraphidium neglectum		CATALYTIC ACTIVITY: L-threonine + ATP + HCO(3)(-) = L-threonylcarbamoyladenylate + diphosphate + H(2)O. {ECO:0000256|PIRNR:PIRNR004930}.	cytoplasm [GO:0005737]; ATP binding [GO:0005524]; double-stranded RNA binding [GO:0003725]; L-threonylcarbamoyladenylate synthase [GO:0061710]		ATP binding [GO:0005524]; double-stranded RNA binding [GO:0003725]; L-threonylcarbamoyladenylate synthase [GO:0061710]	cytoplasm [GO:0005737]	25726661
A0A0D2KAZ6	A0A0D2KAZ6_9CHLO	unreviewed	Putative transporter	MNEG_0544	Monoraphidium neglectum			integral component of membrane [GO:0016021]; antiporter activity [GO:0015297]; drug transmembrane transporter activity [GO:0015238]		antiporter activity [GO:0015297]; drug transmembrane transporter activity [GO:0015238]	integral component of membrane [GO:0016021]	25726662
A0A0D2LM33	A0A0D2LM33_9CHLO	unreviewed	Uncharacterized protein	MNEG_0545	Monoraphidium neglectum			integral component of membrane [GO:0016021]; antiporter activity [GO:0015297]; drug transmembrane transporter activity [GO:0015238]		antiporter activity [GO:0015297]; drug transmembrane transporter activity [GO:0015238]	integral component of membrane [GO:0016021]	25726663
A0A0D2MY55	A0A0D2MY55_9CHLO	unreviewed	Uncharacterized protein	MNEG_0546	Monoraphidium neglectum							25726664
A0A0D2NT77	A0A0D2NT77_9CHLO	unreviewed	Uncharacterized protein	MNEG_0547	Monoraphidium neglectum							25726665
A0A0D2N526	A0A0D2N526_9CHLO	unreviewed	Beta-1,4-xylanase (EC 3.2.1.8)	MNEG_0548	Monoraphidium neglectum			endo-1,4-beta-xylanase activity [GO:0031176]; xylan catabolic process [GO:0045493]	xylan catabolic process [GO:0045493]	endo-1,4-beta-xylanase activity [GO:0031176]		25726666
A0A0D2KB01	A0A0D2KB01_9CHLO	unreviewed	60S ribosomal protein L4	MNEG_0549	Monoraphidium neglectum			ribosome [GO:0005840]; structural constituent of ribosome [GO:0003735]; translation [GO:0006412]	translation [GO:0006412]	structural constituent of ribosome [GO:0003735]	ribosome [GO:0005840]	25726667
A0A0D2LM39	A0A0D2LM39_9CHLO	unreviewed	Putative 2-oxoglutarate/malatecarrier protein	MNEG_0550	Monoraphidium neglectum			integral component of membrane [GO:0016021]; molybdate ion transmembrane transporter activity [GO:0015098]		molybdate ion transmembrane transporter activity [GO:0015098]	integral component of membrane [GO:0016021]	25726668
A0A0D2N508	A0A0D2N508_9CHLO	unreviewed	Uncharacterized protein	MNEG_0551	Monoraphidium neglectum							25726669
A0A0D2KAY5	A0A0D2KAY5_9CHLO	unreviewed	Uncharacterized protein	MNEG_0552	Monoraphidium neglectum							25726670
A0A0D2LM20	A0A0D2LM20_9CHLO	unreviewed	Uncharacterized protein	MNEG_0553	Monoraphidium neglectum							25726671
A0A0D2MY39	A0A0D2MY39_9CHLO	unreviewed	5'-nucleotidase (EC 3.1.3.5)	MNEG_0554	Monoraphidium neglectum			5'-nucleotidase activity [GO:0008253]		5'-nucleotidase activity [GO:0008253]		25726672
A0A0D2NT62	A0A0D2NT62_9CHLO	unreviewed	Dynein, axonemal, heavy chain 11 (EC 3.6.1.3) (Fragment)	MNEG_0555	Monoraphidium neglectum			dynein complex [GO:0030286]; ATP binding [GO:0005524]; ATPase activity [GO:0016887]; microtubule motor activity [GO:0003777]; microtubule-based movement [GO:0007018]	microtubule-based movement [GO:0007018]	ATPase activity [GO:0016887]; ATP binding [GO:0005524]; microtubule motor activity [GO:0003777]	dynein complex [GO:0030286]	25726673
A0A0D2KAX3	A0A0D2KAX3_9CHLO	unreviewed	Ubiquitin specific peptidase 24	MNEG_0556	Monoraphidium neglectum			thiol-dependent ubiquitinyl hydrolase activity [GO:0036459]; protein deubiquitination [GO:0016579]; ubiquitin-dependent protein catabolic process [GO:0006511]	protein deubiquitination [GO:0016579]; ubiquitin-dependent protein catabolic process [GO:0006511]	thiol-dependent ubiquitinyl hydrolase activity [GO:0036459]		25726674
A0A0D2LM07	A0A0D2LM07_9CHLO	unreviewed	Ferredoxin-thioredoxin reductase, catalytic chain (FTR-C) (EC 1.8.7.2) (Ferredoxin-thioredoxin reductase subunit B)	MNEG_0557	Monoraphidium neglectum		CATALYTIC ACTIVITY: 2 reduced ferredoxin + thioredoxin disulfide = 2 oxidized ferredoxin + thioredoxin + 2 H(+). {ECO:0000256|PIRNR:PIRNR000260}.	oxidoreductase activity, acting on iron-sulfur proteins as donors [GO:0016730]		oxidoreductase activity, acting on iron-sulfur proteins as donors [GO:0016730]		25726675
A0A0D2MY32	A0A0D2MY32_9CHLO	unreviewed	Uncharacterized protein	MNEG_0558	Monoraphidium neglectum							25726676
A0A0D2NT51	A0A0D2NT51_9CHLO	unreviewed	Uncharacterized protein	MNEG_0559	Monoraphidium neglectum							25726677
A0A0D2N501	A0A0D2N501_9CHLO	unreviewed	Uncharacterized protein	MNEG_0560	Monoraphidium neglectum			ATP binding [GO:0005524]		ATP binding [GO:0005524]		25726678
A0A0D2KAY0	A0A0D2KAY0_9CHLO	unreviewed	Uncharacterized protein	MNEG_0561	Monoraphidium neglectum			integral component of membrane [GO:0016021]			integral component of membrane [GO:0016021]	25726679
A0A0D2LM13	A0A0D2LM13_9CHLO	unreviewed	Pre-mRNA-splicing factor 38B	MNEG_0562	Monoraphidium neglectum							25726680
A0A0D2MY35	A0A0D2MY35_9CHLO	unreviewed	Chlorophyll a-b binding protein, chloroplastic	MNEG_0563	Monoraphidium neglectum			chloroplast thylakoid membrane [GO:0009535]; integral component of membrane [GO:0016021]; photosystem I [GO:0009522]; photosystem II [GO:0009523]; chlorophyll binding [GO:0016168]; photosynthesis, light harvesting [GO:0009765]; protein-chromophore linkage [GO:0018298]	photosynthesis, light harvesting [GO:0009765]; protein-chromophore linkage [GO:0018298]	chlorophyll binding [GO:0016168]	chloroplast thylakoid membrane [GO:0009535]; integral component of membrane [GO:0016021]; photosystem I [GO:0009522]; photosystem II [GO:0009523]	25726681
A0A0D2NT57	A0A0D2NT57_9CHLO	unreviewed	Uncharacterized protein	MNEG_0564	Monoraphidium neglectum							25726682
A0A0D2KAW4	A0A0D2KAW4_9CHLO	unreviewed	Uncharacterized protein	MNEG_0565	Monoraphidium neglectum							25726683
A0A0D2LLZ6	A0A0D2LLZ6_9CHLO	unreviewed	Uncharacterized protein	MNEG_0566	Monoraphidium neglectum							25726684
A0A0D2MY22	A0A0D2MY22_9CHLO	unreviewed	Uncharacterized protein	MNEG_0567	Monoraphidium neglectum			pyridoxal phosphate binding [GO:0030170]; transaminase activity [GO:0008483]; arginine metabolic process [GO:0006525]	arginine metabolic process [GO:0006525]	pyridoxal phosphate binding [GO:0030170]; transaminase activity [GO:0008483]		25726685
A0A0D2NT43	A0A0D2NT43_9CHLO	unreviewed	3-isopropylmalate/(R)-2-methylmalatedehydratase small subunit (EC 4.2.1.35)	MNEG_0568	Monoraphidium neglectum			(R)-2-methylmalate dehydratase activity [GO:0047508]; metabolic process [GO:0008152]	metabolic process [GO:0008152]	(R)-2-methylmalate dehydratase activity [GO:0047508]		25726686
A0A0D2N4Y4	A0A0D2N4Y4_9CHLO	unreviewed	Uncharacterized protein	MNEG_0569	Monoraphidium neglectum							25726687
A0A0D2KAW8	A0A0D2KAW8_9CHLO	unreviewed	Uncharacterized protein	MNEG_0570	Monoraphidium neglectum			ATP binding [GO:0005524]; protein kinase activity [GO:0004672]		ATP binding [GO:0005524]; protein kinase activity [GO:0004672]		25726688
A0A0D2LM01	A0A0D2LM01_9CHLO	unreviewed	Far upstream element-binding protein 3	MNEG_0571	Monoraphidium neglectum			RNA binding [GO:0003723]		RNA binding [GO:0003723]		25726689
A0A0D2MY27	A0A0D2MY27_9CHLO	unreviewed	Uncharacterized protein	MNEG_0572	Monoraphidium neglectum							25726690
A0A0D2NT47	A0A0D2NT47_9CHLO	unreviewed	MiaB-like tRNA modifying enzyme YliG (EC 1.3.1.74)	MNEG_0573	Monoraphidium neglectum			cytoplasm [GO:0005737]; 2-alkenal reductase [NAD(P)] activity [GO:0032440]; 4 iron, 4 sulfur cluster binding [GO:0051539]; transferase activity [GO:0016740]; peptidyl-L-beta-methylthioaspartic acid biosynthetic process from peptidyl-aspartic acid [GO:0018339]; tRNA modification [GO:0006400]	peptidyl-L-beta-methylthioaspartic acid biosynthetic process from peptidyl-aspartic acid [GO:0018339]; tRNA modification [GO:0006400]	2-alkenal reductase [NAD(P)] activity [GO:0032440]; 4 iron, 4 sulfur cluster binding [GO:0051539]; transferase activity [GO:0016740]	cytoplasm [GO:0005737]	25726691
A0A0D2N4Z3	A0A0D2N4Z3_9CHLO	unreviewed	Putative tartrate transporter	MNEG_0574	Monoraphidium neglectum			integral component of membrane [GO:0016021]; transmembrane transport [GO:0055085]	transmembrane transport [GO:0055085]		integral component of membrane [GO:0016021]	25726692
A0A0D2KAV1	A0A0D2KAV1_9CHLO	unreviewed	LRR repeat and ubiquitin-like domain-containing protein (Fragment)	MNEG_0575	Monoraphidium neglectum							25726693
A0A0D2LLY3	A0A0D2LLY3_9CHLO	unreviewed	Uncharacterized protein	MNEG_0576	Monoraphidium neglectum			kinase activity [GO:0016301]; protein tyrosine/serine/threonine phosphatase activity [GO:0008138]; cortical microtubule organization [GO:0043622]; response to abscisic acid [GO:0009737]	cortical microtubule organization [GO:0043622]; response to abscisic acid [GO:0009737]	kinase activity [GO:0016301]; protein tyrosine/serine/threonine phosphatase activity [GO:0008138]		25726694
A0A0D2MY11	A0A0D2MY11_9CHLO	unreviewed	Uncharacterized protein	MNEG_0577	Monoraphidium neglectum			metal ion binding [GO:0046872]; metalloendopeptidase activity [GO:0004222]		metal ion binding [GO:0046872]; metalloendopeptidase activity [GO:0004222]		25726695
A0A0D2NT34	A0A0D2NT34_9CHLO	unreviewed	Ubiquitin and WLM domain-containing protein	MNEG_0578	Monoraphidium neglectum							25726696
A0A0D2N4W9	A0A0D2N4W9_9CHLO	unreviewed	Uncharacterized protein	MNEG_0579	Monoraphidium neglectum							25726697
A0A0D2KAV8	A0A0D2KAV8_9CHLO	unreviewed	Photosystem II reaction center W protein	MNEG_0580	Monoraphidium neglectum			chloroplast [GO:0009507]; integral component of membrane [GO:0016021]; photosystem II [GO:0009523]; photosynthesis [GO:0015979]	photosynthesis [GO:0015979]		chloroplast [GO:0009507]; integral component of membrane [GO:0016021]; photosystem II [GO:0009523]	25726698
A0A0D2LLZ0	A0A0D2LLZ0_9CHLO	unreviewed	DNA-3-methyladenine glycosylase II (EC 3.2.2.21)	MNEG_0581	Monoraphidium neglectum			DNA-3-methyladenine glycosylase activity [GO:0008725]; DNA-3-methylguanine glycosylase activity [GO:0052822]; DNA-7-methyladenine glycosylase activity [GO:0052821]; DNA-7-methylguanine glycosylase activity [GO:0043916]; base-excision repair [GO:0006284]	base-excision repair [GO:0006284]	DNA-3-methyladenine glycosylase activity [GO:0008725]; DNA-3-methylguanine glycosylase activity [GO:0052822]; DNA-7-methyladenine glycosylase activity [GO:0052821]; DNA-7-methylguanine glycosylase activity [GO:0043916]		25726699
A0A0D2MY18	A0A0D2MY18_9CHLO	unreviewed	Ribose-phosphate pyrophosphokinase (EC 2.7.6.1)	MNEG_0582	Monoraphidium neglectum			kinase activity [GO:0016301]; magnesium ion binding [GO:0000287]; ribose phosphate diphosphokinase activity [GO:0004749]; nucleoside metabolic process [GO:0009116]; nucleotide biosynthetic process [GO:0009165]	nucleoside metabolic process [GO:0009116]; nucleotide biosynthetic process [GO:0009165]	kinase activity [GO:0016301]; magnesium ion binding [GO:0000287]; ribose phosphate diphosphokinase activity [GO:0004749]		25726700
A0A0D2NT37	A0A0D2NT37_9CHLO	unreviewed	Uncharacterized protein	MNEG_0583	Monoraphidium neglectum			actin binding [GO:0003779]		actin binding [GO:0003779]		25726701
A0A0D2N4X7	A0A0D2N4X7_9CHLO	unreviewed	Golgi apparatus membrane protein TVP23	MNEG_0584	Monoraphidium neglectum			Golgi membrane [GO:0000139]; integral component of membrane [GO:0016021]			Golgi membrane [GO:0000139]; integral component of membrane [GO:0016021]	25726702
A0A0D2LLX2	A0A0D2LLX2_9CHLO	unreviewed	Aminotransferase, classes I and II (EC 2.6.1.1)	MNEG_0585	Monoraphidium neglectum			L-aspartate:2-oxoglutarate aminotransferase activity [GO:0004069]; L-phenylalanine:2-oxoglutarate aminotransferase activity [GO:0080130]; pyridoxal phosphate binding [GO:0030170]; biosynthetic process [GO:0009058]	biosynthetic process [GO:0009058]	L-aspartate:2-oxoglutarate aminotransferase activity [GO:0004069]; L-phenylalanine:2-oxoglutarate aminotransferase activity [GO:0080130]; pyridoxal phosphate binding [GO:0030170]		25726703
A0A0D2MY01	A0A0D2MY01_9CHLO	unreviewed	Uncharacterized protein	MNEG_0586	Monoraphidium neglectum			nucleus [GO:0005634]; DNA binding [GO:0003677]; DNA-directed DNA polymerase activity [GO:0003887]; DNA repair [GO:0006281]	DNA repair [GO:0006281]	DNA binding [GO:0003677]; DNA-directed DNA polymerase activity [GO:0003887]	nucleus [GO:0005634]	25726704
A0A0D2NT23	A0A0D2NT23_9CHLO	unreviewed	Uncharacterized protein	MNEG_0587	Monoraphidium neglectum							25726705
A0A0D2N4W0	A0A0D2N4W0_9CHLO	unreviewed	Uncharacterized protein	MNEG_0588	Monoraphidium neglectum			hydrolase activity [GO:0016787]; lipid metabolic process [GO:0006629]	lipid metabolic process [GO:0006629]	hydrolase activity [GO:0016787]		25726706
A0A0D2KAU6	A0A0D2KAU6_9CHLO	unreviewed	Uncharacterized protein	MNEG_0589	Monoraphidium neglectum							25726707
A0A0D2LLX8	A0A0D2LLX8_9CHLO	unreviewed	Amine oxidase (EC 1.4.3.-)	MNEG_0590	Monoraphidium neglectum			copper ion binding [GO:0005507]; primary amine oxidase activity [GO:0008131]; quinone binding [GO:0048038]; amine metabolic process [GO:0009308]	amine metabolic process [GO:0009308]	copper ion binding [GO:0005507]; primary amine oxidase activity [GO:0008131]; quinone binding [GO:0048038]		25726708
A0A0D2MY04	A0A0D2MY04_9CHLO	unreviewed	N-acyl phosphatidylethanolamine phospholipase D (EC 3.1.4.-)	MNEG_0591	Monoraphidium neglectum			N-acylphosphatidylethanolamine-specific phospholipase D activity [GO:0070290]; zinc ion binding [GO:0008270]		N-acylphosphatidylethanolamine-specific phospholipase D activity [GO:0070290]; zinc ion binding [GO:0008270]		25726709
A0A0D2NT28	A0A0D2NT28_9CHLO	unreviewed	Uncharacterized protein	MNEG_0592	Monoraphidium neglectum							25726710
A0A0D2N4W4	A0A0D2N4W4_9CHLO	unreviewed	Uncharacterized protein	MNEG_0593	Monoraphidium neglectum			integral component of membrane [GO:0016021]			integral component of membrane [GO:0016021]	25726711
A0A0D2MXZ0	A0A0D2MXZ0_9CHLO	unreviewed	Uncharacterized protein (Fragment)	MNEG_0594	Monoraphidium neglectum							25726712
A0A0D2NT06	A0A0D2NT06_9CHLO	unreviewed	Uncharacterized protein	MNEG_0595	Monoraphidium neglectum							25726713
A0A0D2N4V2	A0A0D2N4V2_9CHLO	unreviewed	Uncharacterized protein	MNEG_0596	Monoraphidium neglectum			FMN binding [GO:0010181]		FMN binding [GO:0010181]		25726714
A0A0D2KAS8	A0A0D2KAS8_9CHLO	unreviewed	Uncharacterized protein	MNEG_0597	Monoraphidium neglectum			integral component of membrane [GO:0016021]			integral component of membrane [GO:0016021]	25726715
A0A0D2LLV7	A0A0D2LLV7_9CHLO	unreviewed	Protease Do-like 8 (EC 1.3.1.74)	MNEG_0598	Monoraphidium neglectum			2-alkenal reductase [NAD(P)] activity [GO:0032440]; serine-type endopeptidase activity [GO:0004252]		2-alkenal reductase [NAD(P)] activity [GO:0032440]; serine-type endopeptidase activity [GO:0004252]		25726716
A0A0D2MXZ3	A0A0D2MXZ3_9CHLO	unreviewed	Uncharacterized protein	MNEG_0599	Monoraphidium neglectum							25726717
A0A0D2NT12	A0A0D2NT12_9CHLO	unreviewed	Intermediate peptidase (EC 3.4.24.59)	MNEG_0600	Monoraphidium neglectum			mitochondrial matrix [GO:0005759]; metal ion binding [GO:0046872]; metalloendopeptidase activity [GO:0004222]; protein processing involved in protein targeting to mitochondrion [GO:0006627]	protein processing involved in protein targeting to mitochondrion [GO:0006627]	metal ion binding [GO:0046872]; metalloendopeptidase activity [GO:0004222]	mitochondrial matrix [GO:0005759]	25726718
A0A0D2N4V6	A0A0D2N4V6_9CHLO	unreviewed	Uncharacterized protein	MNEG_0601	Monoraphidium neglectum							25726719
A0A0D2KAT5	A0A0D2KAT5_9CHLO	unreviewed	Intermediate peptidase (EC 3.4.24.59)	MNEG_0602	Monoraphidium neglectum			mitochondrial matrix [GO:0005759]; metalloendopeptidase activity [GO:0004222]; protein processing involved in protein targeting to mitochondrion [GO:0006627]	protein processing involved in protein targeting to mitochondrion [GO:0006627]	metalloendopeptidase activity [GO:0004222]	mitochondrial matrix [GO:0005759]	25726720
A0A0D2LLW5	A0A0D2LLW5_9CHLO	unreviewed	Uncharacterized protein	MNEG_0603	Monoraphidium neglectum			nucleus [GO:0005634]; DNA-templated transcription, initiation [GO:0006352]	DNA-templated transcription, initiation [GO:0006352]		nucleus [GO:0005634]	25726721
A0A0D2MXZ7	A0A0D2MXZ7_9CHLO	unreviewed	Uncharacterized protein	MNEG_0604	Monoraphidium neglectum			regulation of cell cycle [GO:0051726]	regulation of cell cycle [GO:0051726]			25726722
A0A0D2NT17	A0A0D2NT17_9CHLO	unreviewed	Uncharacterized protein	MNEG_0605	Monoraphidium neglectum			ATP binding [GO:0005524]; nucleic acid binding [GO:0003676]		ATP binding [GO:0005524]; nucleic acid binding [GO:0003676]		25726723
A0A0D2N4V7	A0A0D2N4V7_9CHLO	unreviewed	HIV Tat-specific factor 1	MNEG_0606	Monoraphidium neglectum			RNA binding [GO:0003723]; mRNA splicing, via spliceosome [GO:0000398]	mRNA splicing, via spliceosome [GO:0000398]	RNA binding [GO:0003723]		25726724
A0A0D2KAU1	A0A0D2KAU1_9CHLO	unreviewed	60S ribosomal protein L27 (Fragment)	MNEG_0607	Monoraphidium neglectum			ribosome [GO:0005840]; structural constituent of ribosome [GO:0003735]; translation [GO:0006412]	translation [GO:0006412]	structural constituent of ribosome [GO:0003735]	ribosome [GO:0005840]	25726725
A0A0D2N4U5	A0A0D2N4U5_9CHLO	unreviewed	Uncharacterized protein (Fragment)	MNEG_0608	Monoraphidium neglectum			nucleus [GO:0005634]; DNA-directed 5'-3' RNA polymerase activity [GO:0003899]; transcription, DNA-templated [GO:0006351]	transcription, DNA-templated [GO:0006351]	DNA-directed 5'-3' RNA polymerase activity [GO:0003899]	nucleus [GO:0005634]	25726726
A0A0D2KAR7	A0A0D2KAR7_9CHLO	unreviewed	Uncharacterized protein	MNEG_0609	Monoraphidium neglectum			integral component of membrane [GO:0016021]			integral component of membrane [GO:0016021]	25726727
A0A0D2LLU6	A0A0D2LLU6_9CHLO	unreviewed	Uncharacterized protein	MNEG_0610	Monoraphidium neglectum							25726728
A0A0D2MXY6	A0A0D2MXY6_9CHLO	unreviewed	Uncharacterized protein	MNEG_0611	Monoraphidium neglectum							25726729
A0A0D2NT01	A0A0D2NT01_9CHLO	unreviewed	Oligopeptidase B (EC 3.4.21.83)	MNEG_0612	Monoraphidium neglectum			serine-type endopeptidase activity [GO:0004252]; serine-type exopeptidase activity [GO:0070008]		serine-type endopeptidase activity [GO:0004252]; serine-type exopeptidase activity [GO:0070008]		25726730
A0A0D2N4U9	A0A0D2N4U9_9CHLO	unreviewed	5-methyltetrahydrofolate-homocysteine methyltransferase reductase (EC 1.16.1.8)	MNEG_0613	Monoraphidium neglectum			[methionine synthase] reductase activity [GO:0030586]; FMN binding [GO:0010181]; methyltransferase activity [GO:0008168]		[methionine synthase] reductase activity [GO:0030586]; FMN binding [GO:0010181]; methyltransferase activity [GO:0008168]		25726731
A0A0D2KAS3	A0A0D2KAS3_9CHLO	unreviewed	Uncharacterized protein	MNEG_0614	Monoraphidium neglectum			integral component of membrane [GO:0016021]			integral component of membrane [GO:0016021]	25726732
A0A0D2LLV1	A0A0D2LLV1_9CHLO	unreviewed	Uncharacterized protein	MNEG_0615	Monoraphidium neglectum							25726733
A0A0D2LLT3	A0A0D2LLT3_9CHLO	unreviewed	Uncharacterized protein (Fragment)	MNEG_0616	Monoraphidium neglectum			integral component of membrane [GO:0016021]			integral component of membrane [GO:0016021]	25726734
A0A0D2MXX7	A0A0D2MXX7_9CHLO	unreviewed	Uncharacterized protein	MNEG_0617	Monoraphidium neglectum			integral component of membrane [GO:0016021]; plasma membrane [GO:0005886]; copper ion binding [GO:0005507]; oxidoreductase activity [GO:0016491]; cellular iron ion homeostasis [GO:0006879]; iron ion transport [GO:0006826]	cellular iron ion homeostasis [GO:0006879]; iron ion transport [GO:0006826]	copper ion binding [GO:0005507]; oxidoreductase activity [GO:0016491]	integral component of membrane [GO:0016021]; plasma membrane [GO:0005886]	25726735
A0A0D2NSZ3	A0A0D2NSZ3_9CHLO	unreviewed	Uncharacterized protein	MNEG_0618	Monoraphidium neglectum			cell [GO:0005623]; copper ion binding [GO:0005507]; ferroxidase activity [GO:0004322]; cellular iron ion homeostasis [GO:0006879]; copper ion transport [GO:0006825]	cellular iron ion homeostasis [GO:0006879]; copper ion transport [GO:0006825]	copper ion binding [GO:0005507]; ferroxidase activity [GO:0004322]	cell [GO:0005623]	25726736
A0A0D2N4U1	A0A0D2N4U1_9CHLO	unreviewed	Uncharacterized protein	MNEG_0619	Monoraphidium neglectum			cell [GO:0005623]; cell redox homeostasis [GO:0045454]	cell redox homeostasis [GO:0045454]		cell [GO:0005623]	25726737
A0A0D2KAR1	A0A0D2KAR1_9CHLO	unreviewed	Uncharacterized protein	MNEG_0620	Monoraphidium neglectum							25726738
A0A0D2LLT9	A0A0D2LLT9_9CHLO	unreviewed	Uncharacterized protein	MNEG_0621	Monoraphidium neglectum							25726739
A0A0D2MXY1	A0A0D2MXY1_9CHLO	unreviewed	Uncharacterized protein	MNEG_0622	Monoraphidium neglectum							25726740
A0A0D2NSZ7	A0A0D2NSZ7_9CHLO	unreviewed	Uncharacterized protein	MNEG_0623	Monoraphidium neglectum			intracellular [GO:0005622]; transport [GO:0006810]	transport [GO:0006810]		intracellular [GO:0005622]	25726741
A0A0D2MXW0	A0A0D2MXW0_9CHLO	unreviewed	(Acyl-carrier-protein) S-malonyltransferase (EC 2.3.1.39)	MNEG_0624	Monoraphidium neglectum			[acyl-carrier-protein] S-malonyltransferase activity [GO:0004314]; metabolic process [GO:0008152]	metabolic process [GO:0008152]	[acyl-carrier-protein] S-malonyltransferase activity [GO:0004314]		25726742
A0A0D2NSY0	A0A0D2NSY0_9CHLO	unreviewed	Uncharacterized protein	MNEG_0625	Monoraphidium neglectum							25726743
A0A0D2N4T2	A0A0D2N4T2_9CHLO	unreviewed	Glutamate decarboxylase (EC 4.1.1.29)	MNEG_0626	Monoraphidium neglectum			pyridoxal phosphate binding [GO:0030170]; sulfinoalanine decarboxylase activity [GO:0004782]; carboxylic acid metabolic process [GO:0019752]	carboxylic acid metabolic process [GO:0019752]	pyridoxal phosphate binding [GO:0030170]; sulfinoalanine decarboxylase activity [GO:0004782]		25726744
A0A0D2KAP5	A0A0D2KAP5_9CHLO	unreviewed	Uncharacterized protein	MNEG_0627	Monoraphidium neglectum							25726745
A0A0D2LLS1	A0A0D2LLS1_9CHLO	unreviewed	Uncharacterized protein	MNEG_0628	Monoraphidium neglectum							25726746
A0A0D2MXW6	A0A0D2MXW6_9CHLO	unreviewed	Uncharacterized protein	MNEG_0629	Monoraphidium neglectum			integral component of membrane [GO:0016021]			integral component of membrane [GO:0016021]	25726747
A0A0D2NSY4	A0A0D2NSY4_9CHLO	unreviewed	NIMA (Never in mitosis a)-related kinase (EC 2.7.11.1)	MNEG_0630	Monoraphidium neglectum			ATP binding [GO:0005524]; protein kinase activity [GO:0004672]		ATP binding [GO:0005524]; protein kinase activity [GO:0004672]		25726748
A0A0D2N4T5	A0A0D2N4T5_9CHLO	unreviewed	Uncharacterized protein	MNEG_0631	Monoraphidium neglectum							25726749
A0A0D2KAQ0	A0A0D2KAQ0_9CHLO	unreviewed	Uncharacterized protein	MNEG_0632	Monoraphidium neglectum							25726750
A0A0D2LLS7	A0A0D2LLS7_9CHLO	unreviewed	Uncharacterized protein	MNEG_0633	Monoraphidium neglectum							25726751
A0A0D2MXX2	A0A0D2MXX2_9CHLO	unreviewed	Uncharacterized protein	MNEG_0634	Monoraphidium neglectum							25726752
A0A0D2NSY8	A0A0D2NSY8_9CHLO	unreviewed	Uncharacterized protein	MNEG_0635	Monoraphidium neglectum							25726753
A0A0D2N4T9	A0A0D2N4T9_9CHLO	unreviewed	Uncharacterized protein	MNEG_0636	Monoraphidium neglectum			intracellular [GO:0005622]; GTP binding [GO:0005525]; small GTPase mediated signal transduction [GO:0007264]	small GTPase mediated signal transduction [GO:0007264]	GTP binding [GO:0005525]	intracellular [GO:0005622]	25726754
A0A0D2KAQ6	A0A0D2KAQ6_9CHLO	unreviewed	Uncharacterized protein (Fragment)	MNEG_0637	Monoraphidium neglectum							25726755
A0A0D2LLP7	A0A0D2LLP7_9CHLO	unreviewed	Uncharacterized protein (Fragment)	MNEG_0638	Monoraphidium neglectum							25726756
A0A0D2MXT6	A0A0D2MXT6_9CHLO	unreviewed	Uncharacterized protein (Fragment)	MNEG_0639	Monoraphidium neglectum							25726757
A0A0D2NSV6	A0A0D2NSV6_9CHLO	unreviewed	Uncharacterized protein (Fragment)	MNEG_0640	Monoraphidium neglectum							25726758
A0A0D2N4R9	A0A0D2N4R9_9CHLO	unreviewed	Uncharacterized protein (Fragment)	MNEG_0641	Monoraphidium neglectum							25726759
A0A0D2KAL6	A0A0D2KAL6_9CHLO	unreviewed	Uncharacterized protein (Fragment)	MNEG_0642	Monoraphidium neglectum							25726760
A0A0D2LLQ0	A0A0D2LLQ0_9CHLO	unreviewed	Uncharacterized protein (Fragment)	MNEG_0643	Monoraphidium neglectum							25726761
A0A0D2MXU0	A0A0D2MXU0_9CHLO	unreviewed	Uncharacterized protein (Fragment)	MNEG_0644	Monoraphidium neglectum							25726762
A0A0D2NSW5	A0A0D2NSW5_9CHLO	unreviewed	Uncharacterized protein (Fragment)	MNEG_0645	Monoraphidium neglectum							25726763
A0A0D2N4S1	A0A0D2N4S1_9CHLO	unreviewed	Uncharacterized protein (Fragment)	MNEG_0646	Monoraphidium neglectum							25726764
A0A0D2KAM5	A0A0D2KAM5_9CHLO	unreviewed	Uncharacterized protein (Fragment)	MNEG_0647	Monoraphidium neglectum							25726765
A0A0D2LLQ6	A0A0D2LLQ6_9CHLO	unreviewed	Uncharacterized protein (Fragment)	MNEG_0648	Monoraphidium neglectum							25726766
A0A0D2MXU4	A0A0D2MXU4_9CHLO	unreviewed	Uncharacterized protein (Fragment)	MNEG_0649	Monoraphidium neglectum							25726767
A0A0D2NSX3	A0A0D2NSX3_9CHLO	unreviewed	Uncharacterized protein (Fragment)	MNEG_0650	Monoraphidium neglectum							25726768
A0A0D2N4S5	A0A0D2N4S5_9CHLO	unreviewed	Uncharacterized protein (Fragment)	MNEG_0651	Monoraphidium neglectum							25726769
A0A0D2KAN2	A0A0D2KAN2_9CHLO	unreviewed	Uncharacterized protein (Fragment)	MNEG_0652	Monoraphidium neglectum							25726770
A0A0D2LLR2	A0A0D2LLR2_9CHLO	unreviewed	Uncharacterized protein (Fragment)	MNEG_0653	Monoraphidium neglectum							25726771
A0A0D2MXV0	A0A0D2MXV0_9CHLO	unreviewed	Photosystem I reaction center subunit V	MNEG_0654	Monoraphidium neglectum			integral component of membrane [GO:0016021]; photosystem I [GO:0009522]; chlorophyll binding [GO:0016168]; photosynthesis [GO:0015979]	photosynthesis [GO:0015979]	chlorophyll binding [GO:0016168]	integral component of membrane [GO:0016021]; photosystem I [GO:0009522]	25726772
A0A0D2NSX7	A0A0D2NSX7_9CHLO	unreviewed	Uncharacterized protein	MNEG_0655	Monoraphidium neglectum			nucleic acid binding [GO:0003676]; molybdopterin cofactor biosynthetic process [GO:0032324]	molybdopterin cofactor biosynthetic process [GO:0032324]	nucleic acid binding [GO:0003676]		25726773
A0A0D2N4S8	A0A0D2N4S8_9CHLO	unreviewed	OTU domain-containing protein 6B	MNEG_0656	Monoraphidium neglectum							25726774
A0A0D2KAN8	A0A0D2KAN8_9CHLO	unreviewed	Uncharacterized protein	MNEG_0657	Monoraphidium neglectum			flavin adenine dinucleotide binding [GO:0050660]; oxidoreductase activity, acting on the CH-OH group of donors, oxygen as acceptor [GO:0016899]		flavin adenine dinucleotide binding [GO:0050660]; oxidoreductase activity, acting on the CH-OH group of donors, oxygen as acceptor [GO:0016899]		25726775
A0A0D2LLR7	A0A0D2LLR7_9CHLO	unreviewed	Sodium/hydrogen exchanger 8 (Fragment)	MNEG_0658	Monoraphidium neglectum			integral component of membrane [GO:0016021]; solute:proton antiporter activity [GO:0015299]		solute:proton antiporter activity [GO:0015299]	integral component of membrane [GO:0016021]	25726776
A0A0D2KAJ6	A0A0D2KAJ6_9CHLO	unreviewed	Short-chain dehydrogenase/reductase SDR (EC 1.1.1.184)	MNEG_0659	Monoraphidium neglectum			carbonyl reductase (NADPH) activity [GO:0004090]		carbonyl reductase (NADPH) activity [GO:0004090]		25726777
A0A0D2LLN8	A0A0D2LLN8_9CHLO	unreviewed	Uncharacterized protein	MNEG_0660	Monoraphidium neglectum							25726778
A0A0D2MXT1	A0A0D2MXT1_9CHLO	unreviewed	Uncharacterized protein	MNEG_0661	Monoraphidium neglectum							25726779
A0A0D2NSU2	A0A0D2NSU2_9CHLO	unreviewed	Uncharacterized protein	MNEG_0662	Monoraphidium neglectum							25726780
A0A0D2N4R5	A0A0D2N4R5_9CHLO	unreviewed	Ubiquitin thioesterase OTU1 (EC 3.1.2.-)	MNEG_0663	Monoraphidium neglectum			hydrolase activity [GO:0016787]		hydrolase activity [GO:0016787]		25726781
A0A0D2KAK3	A0A0D2KAK3_9CHLO	unreviewed	Uncharacterized protein	MNEG_0664	Monoraphidium neglectum							25726782
A0A0D2LLP3	A0A0D2LLP3_9CHLO	unreviewed	Putative Seed maturation protein PM36 like protein	MNEG_0665	Monoraphidium neglectum							25726783
A0A0D2MXT4	A0A0D2MXT4_9CHLO	unreviewed	Uncharacterized protein	MNEG_0666	Monoraphidium neglectum			small protein activating enzyme activity [GO:0008641]		small protein activating enzyme activity [GO:0008641]		25726784
A0A0D2NSV0	A0A0D2NSV0_9CHLO	unreviewed	Uncharacterized protein	MNEG_0667	Monoraphidium neglectum							25726785
A0A0D2N4R8	A0A0D2N4R8_9CHLO	unreviewed	Short-chain dehydrogenase/reductase SDR	MNEG_0668	Monoraphidium neglectum			hydrolase activity, acting on ester bonds [GO:0016788]; biosynthetic process [GO:0009058]	biosynthetic process [GO:0009058]	hydrolase activity, acting on ester bonds [GO:0016788]		25726786
A0A0D2KAK9	A0A0D2KAK9_9CHLO	unreviewed	Glycyl-tRNA synthetase alpha chain (EC 6.1.1.14)	MNEG_0669	Monoraphidium neglectum			cytoplasm [GO:0005737]; ATP binding [GO:0005524]; glycine-tRNA ligase activity [GO:0004820]; glycyl-tRNA aminoacylation [GO:0006426]	glycyl-tRNA aminoacylation [GO:0006426]	ATP binding [GO:0005524]; glycine-tRNA ligase activity [GO:0004820]	cytoplasm [GO:0005737]	25726787
A0A0D2MXR9	A0A0D2MXR9_9CHLO	unreviewed	Exocyst complex component SEC3B	MNEG_0670	Monoraphidium neglectum			exocyst [GO:0000145]; exocytosis [GO:0006887]	exocytosis [GO:0006887]		exocyst [GO:0000145]	25726788
A0A0D2NSS8	A0A0D2NSS8_9CHLO	unreviewed	Uncharacterized protein	MNEG_0671	Monoraphidium neglectum							25726789
A0A0D2N4Q5	A0A0D2N4Q5_9CHLO	unreviewed	Uncharacterized protein	MNEG_0672	Monoraphidium neglectum							25726790
A0A0D2KAJ0	A0A0D2KAJ0_9CHLO	unreviewed	Uncharacterized protein	MNEG_0673	Monoraphidium neglectum							25726791
A0A0D2LLN6	A0A0D2LLN6_9CHLO	unreviewed	Uncharacterized protein	MNEG_0674	Monoraphidium neglectum							25726792
A0A0D2MXS6	A0A0D2MXS6_9CHLO	unreviewed	Uncharacterized protein	MNEG_0675	Monoraphidium neglectum							25726793
A0A0D2NST5	A0A0D2NST5_9CHLO	unreviewed	Cytosolic non-specific dipeptidase	MNEG_0676	Monoraphidium neglectum			hydrolase activity [GO:0016787]; metabolic process [GO:0008152]	metabolic process [GO:0008152]	hydrolase activity [GO:0016787]		25726794
A0A0D2N4Q9	A0A0D2N4Q9_9CHLO	unreviewed	Peptidase M20 (EC 3.5.1.18)	MNEG_0677	Monoraphidium neglectum			succinyl-diaminopimelate desuccinylase activity [GO:0009014]		succinyl-diaminopimelate desuccinylase activity [GO:0009014]		25726795
A0A0D2MXQ9	A0A0D2MXQ9_9CHLO	unreviewed	Protein FAM63A	MNEG_0678	Monoraphidium neglectum			Lys48-specific deubiquitinase activity [GO:1990380]; thiol-dependent ubiquitin-specific protease activity [GO:0004843]		Lys48-specific deubiquitinase activity [GO:1990380]; thiol-dependent ubiquitin-specific protease activity [GO:0004843]		25726796
A0A0D2NSR7	A0A0D2NSR7_9CHLO	unreviewed	Uncharacterized protein	MNEG_0679	Monoraphidium neglectum			integral component of membrane [GO:0016021]			integral component of membrane [GO:0016021]	25726797
A0A0D2N4P8	A0A0D2N4P8_9CHLO	unreviewed	Uncharacterized protein	MNEG_0680	Monoraphidium neglectum			integral component of membrane [GO:0016021]; intracellular [GO:0005622]; phosphorus-oxygen lyase activity [GO:0016849]; cyclic nucleotide biosynthetic process [GO:0009190]; intracellular signal transduction [GO:0035556]	cyclic nucleotide biosynthetic process [GO:0009190]; intracellular signal transduction [GO:0035556]	phosphorus-oxygen lyase activity [GO:0016849]	integral component of membrane [GO:0016021]; intracellular [GO:0005622]	25726798
A0A0D2KAH5	A0A0D2KAH5_9CHLO	unreviewed	Major facilitator superfamily domain-containing protein 5	MNEG_0681	Monoraphidium neglectum			integral component of membrane [GO:0016021]; molybdate ion transmembrane transporter activity [GO:0015098]		molybdate ion transmembrane transporter activity [GO:0015098]	integral component of membrane [GO:0016021]	25726799
A0A0D2LLM9	A0A0D2LLM9_9CHLO	unreviewed	Uncharacterized protein	MNEG_0682	Monoraphidium neglectum			actin binding [GO:0003779]; cytoskeleton organization [GO:0007010]	cytoskeleton organization [GO:0007010]	actin binding [GO:0003779]		25726800
A0A0D2MXR4	A0A0D2MXR4_9CHLO	unreviewed	Transcription initiation factor TFIID subunit12	MNEG_0683	Monoraphidium neglectum			transcription factor TFIID complex [GO:0005669]; protein heterodimerization activity [GO:0046982]; translation initiation factor activity [GO:0003743]; DNA-templated transcription, initiation [GO:0006352]	DNA-templated transcription, initiation [GO:0006352]	protein heterodimerization activity [GO:0046982]; translation initiation factor activity [GO:0003743]	transcription factor TFIID complex [GO:0005669]	25726801
A0A0D2NSS2	A0A0D2NSS2_9CHLO	unreviewed	Initiation factor 2B related protein	MNEG_0684	Monoraphidium neglectum			translation initiation factor activity [GO:0003743]		translation initiation factor activity [GO:0003743]		25726802
A0A0D2N4Q2	A0A0D2N4Q2_9CHLO	unreviewed	Putative serine/threonine-protein (EC 2.7.11.1)	MNEG_0685	Monoraphidium neglectum			ATP binding [GO:0005524]; protein kinase activity [GO:0004672]		ATP binding [GO:0005524]; protein kinase activity [GO:0004672]		25726803
A0A0D2KAI2	A0A0D2KAI2_9CHLO	unreviewed	Uncharacterized protein	MNEG_0686	Monoraphidium neglectum			integral component of membrane [GO:0016021]			integral component of membrane [GO:0016021]	25726804
A0A0D2LLN3	A0A0D2LLN3_9CHLO	unreviewed	Vacuolar protein sorting-associated like protein 52	MNEG_0687	Monoraphidium neglectum							25726805
A0A0D2NSQ2	A0A0D2NSQ2_9CHLO	unreviewed	Uncharacterized protein (Fragment)	MNEG_0688	Monoraphidium neglectum			nucleus [GO:0005634]			nucleus [GO:0005634]	25726806
A0A0D2N4P0	A0A0D2N4P0_9CHLO	unreviewed	Uncharacterized protein	MNEG_0689	Monoraphidium neglectum							25726807
A0A0D2KAG8	A0A0D2KAG8_9CHLO	unreviewed	Uncharacterized protein	MNEG_0690	Monoraphidium neglectum							25726808
A0A0D2LLM1	A0A0D2LLM1_9CHLO	unreviewed	Uncharacterized protein	MNEG_0691	Monoraphidium neglectum							25726809
A0A0D2MXQ3	A0A0D2MXQ3_9CHLO	unreviewed	Uncharacterized protein	MNEG_0692	Monoraphidium neglectum			metal ion binding [GO:0046872]		metal ion binding [GO:0046872]		25726810
A0A0D2NSR0	A0A0D2NSR0_9CHLO	unreviewed	Uncharacterized protein	MNEG_0693	Monoraphidium neglectum							25726811
A0A0D2N4P3	A0A0D2N4P3_9CHLO	unreviewed	Guanylate-binding protein 6	MNEG_0694	Monoraphidium neglectum			GTP binding [GO:0005525]; GTPase activity [GO:0003924]		GTPase activity [GO:0003924]; GTP binding [GO:0005525]		25726812
A0A0D2KAH1	A0A0D2KAH1_9CHLO	unreviewed	Carbonic anhydrase (EC 4.2.1.1) (Carbonate dehydratase)	MNEG_0695	Monoraphidium neglectum		CATALYTIC ACTIVITY: H(2)CO(3) = CO(2) + H(2)O. {ECO:0000256|RuleBase:RU003956}.	carbonate dehydratase activity [GO:0004089]; zinc ion binding [GO:0008270]		carbonate dehydratase activity [GO:0004089]; zinc ion binding [GO:0008270]		25726813
A0A0D2LLM5	A0A0D2LLM5_9CHLO	unreviewed	Uncharacterized protein	MNEG_0696	Monoraphidium neglectum							25726814
A0A0D2KAF1	A0A0D2KAF1_9CHLO	unreviewed	T-complex protein 1 subunit epsilon	MNEG_0697	Monoraphidium neglectum			ATP binding [GO:0005524]; unfolded protein binding [GO:0051082]; protein folding [GO:0006457]	protein folding [GO:0006457]	ATP binding [GO:0005524]; unfolded protein binding [GO:0051082]		25726815
A0A0D2LLL0	A0A0D2LLL0_9CHLO	unreviewed	Uncharacterized protein	MNEG_0698	Monoraphidium neglectum			protein metabolic process [GO:0019538]	protein metabolic process [GO:0019538]			25726816
A0A0D2MXN6	A0A0D2MXN6_9CHLO	unreviewed	Pheophorbide a oxygenase (EC 1.-.-.-)	MNEG_0699	Monoraphidium neglectum			integral component of membrane [GO:0016021]; 2 iron, 2 sulfur cluster binding [GO:0051537]; chlorophyllide a oxygenase [overall] activity [GO:0010277]		2 iron, 2 sulfur cluster binding [GO:0051537]; chlorophyllide a oxygenase [overall] activity [GO:0010277]	integral component of membrane [GO:0016021]	25726817
A0A0D2NSP1	A0A0D2NSP1_9CHLO	unreviewed	Uncharacterized protein	MNEG_0700	Monoraphidium neglectum							25726818
A0A0D2N4N3	A0A0D2N4N3_9CHLO	unreviewed	Protein tas	MNEG_0701	Monoraphidium neglectum							25726819
A0A0D2KAF7	A0A0D2KAF7_9CHLO	unreviewed	Uncharacterized protein	MNEG_0702	Monoraphidium neglectum			uroporphyrinogen-III synthase activity [GO:0004852]; tetrapyrrole biosynthetic process [GO:0033014]	tetrapyrrole biosynthetic process [GO:0033014]	uroporphyrinogen-III synthase activity [GO:0004852]		25726820
A0A0D2LLL4	A0A0D2LLL4_9CHLO	unreviewed	Uncharacterized protein	MNEG_0703	Monoraphidium neglectum							25726821
A0A0D2MXP0	A0A0D2MXP0_9CHLO	unreviewed	Uncharacterized protein	MNEG_0704	Monoraphidium neglectum			integral component of membrane [GO:0016021]			integral component of membrane [GO:0016021]	25726822
A0A0D2NSP7	A0A0D2NSP7_9CHLO	unreviewed	L-gulonolactone oxidase	MNEG_0705	Monoraphidium neglectum			membrane [GO:0016020]; D-arabinono-1,4-lactone oxidase activity [GO:0003885]; flavin adenine dinucleotide binding [GO:0050660]		D-arabinono-1,4-lactone oxidase activity [GO:0003885]; flavin adenine dinucleotide binding [GO:0050660]	membrane [GO:0016020]	25726823
A0A0D2N4N6	A0A0D2N4N6_9CHLO	unreviewed	Sugar transport protein 5	MNEG_0706	Monoraphidium neglectum			integral component of membrane [GO:0016021]; transmembrane transporter activity [GO:0022857]; carbohydrate transport [GO:0008643]	carbohydrate transport [GO:0008643]	transmembrane transporter activity [GO:0022857]	integral component of membrane [GO:0016021]	25726824
A0A0D2KAG2	A0A0D2KAG2_9CHLO	unreviewed	Uncharacterized protein	MNEG_0707	Monoraphidium neglectum							25726825
A0A0D2LLL8	A0A0D2LLL8_9CHLO	unreviewed	Protein YIPF	MNEG_0708	Monoraphidium neglectum			integral component of membrane [GO:0016021]			integral component of membrane [GO:0016021]	25726826
A0A0D2MXP6	A0A0D2MXP6_9CHLO	unreviewed	Uncharacterized protein (Fragment)	MNEG_0709	Monoraphidium neglectum							25726827
A0A0D2KAE1	A0A0D2KAE1_9CHLO	unreviewed	Chromatin remodeling complex subunit (EC 2.7.11.1) (Fragment)	MNEG_0710	Monoraphidium neglectum			ATP binding [GO:0005524]; metal ion binding [GO:0046872]; transferase activity [GO:0016740]		ATP binding [GO:0005524]; metal ion binding [GO:0046872]; transferase activity [GO:0016740]		25726828
A0A0D2LLK3	A0A0D2LLK3_9CHLO	unreviewed	Uncharacterized protein	MNEG_0711	Monoraphidium neglectum			integral component of membrane [GO:0016021]			integral component of membrane [GO:0016021]	25726829
A0A0D2MXM7	A0A0D2MXM7_9CHLO	unreviewed	Uncharacterized protein	MNEG_0712	Monoraphidium neglectum							25726830
A0A0D2NSM7	A0A0D2NSM7_9CHLO	unreviewed	Carbohydrate/purine kinase	MNEG_0713	Monoraphidium neglectum			kinase activity [GO:0016301]		kinase activity [GO:0016301]		25726831
A0A0D2N4M6	A0A0D2N4M6_9CHLO	unreviewed	Uncharacterized protein	MNEG_0714	Monoraphidium neglectum			integral component of membrane [GO:0016021]			integral component of membrane [GO:0016021]	25726832
A0A0D2KAE6	A0A0D2KAE6_9CHLO	unreviewed	Uncharacterized protein	MNEG_0715	Monoraphidium neglectum			integral component of membrane [GO:0016021]			integral component of membrane [GO:0016021]	25726833
A0A0D2LLK6	A0A0D2LLK6_9CHLO	unreviewed	Ubiquitin-conjugating enzyme E2 H (EC 6.3.2.19)	MNEG_0716	Monoraphidium neglectum			ATP binding [GO:0005524]; ligase activity [GO:0016874]		ATP binding [GO:0005524]; ligase activity [GO:0016874]		25726834
A0A0D2MXN4	A0A0D2MXN4_9CHLO	unreviewed	Uncharacterized protein	MNEG_0717	Monoraphidium neglectum			nucleotidyltransferase activity [GO:0016779]; RNA binding [GO:0003723]; RNA processing [GO:0006396]	RNA processing [GO:0006396]	nucleotidyltransferase activity [GO:0016779]; RNA binding [GO:0003723]		25726835
A0A0D2NSN4	A0A0D2NSN4_9CHLO	unreviewed	LMBR1 domain-containing protein 2	MNEG_0718	Monoraphidium neglectum			integral component of membrane [GO:0016021]			integral component of membrane [GO:0016021]	25726836
A0A0D2N4N0	A0A0D2N4N0_9CHLO	unreviewed	Uncharacterized protein	MNEG_0719	Monoraphidium neglectum							25726837
A0A0D2MXL8	A0A0D2MXL8_9CHLO	unreviewed	Uncharacterized protein	MNEG_0720	Monoraphidium neglectum			ATP binding [GO:0005524]		ATP binding [GO:0005524]		25726838
A0A0D2NSL6	A0A0D2NSL6_9CHLO	unreviewed	Glutathione S-transferase (EC 2.5.1.18)	MNEG_0721	Monoraphidium neglectum			glutathione transferase activity [GO:0004364]		glutathione transferase activity [GO:0004364]		25726839
A0A0D2N4M0	A0A0D2N4M0_9CHLO	unreviewed	Glutathione S-transferase (EC 2.5.1.18)	MNEG_0722	Monoraphidium neglectum			glutathione transferase activity [GO:0004364]		glutathione transferase activity [GO:0004364]		25726840
A0A0D2KAD5	A0A0D2KAD5_9CHLO	unreviewed	8-amino-7-oxononanoate synthase (EC 2.3.1.47)	MNEG_0723	Monoraphidium neglectum			8-amino-7-oxononanoate synthase activity [GO:0008710]; hydroxymethylglutaryl-CoA synthase activity [GO:0004421]; oxidoreductase activity [GO:0016491]; phosphopantetheine binding [GO:0031177]; pyridoxal phosphate binding [GO:0030170]; isoprenoid biosynthetic process [GO:0008299]	isoprenoid biosynthetic process [GO:0008299]	8-amino-7-oxononanoate synthase activity [GO:0008710]; hydroxymethylglutaryl-CoA synthase activity [GO:0004421]; oxidoreductase activity [GO:0016491]; phosphopantetheine binding [GO:0031177]; pyridoxal phosphate binding [GO:0030170]		25726841
A0A0D2LLJ9	A0A0D2LLJ9_9CHLO	unreviewed	Phenolpthiocerol synthesis polyketide synthase ppsA	MNEG_0724	Monoraphidium neglectum			catalytic activity [GO:0003824]; metabolic process [GO:0008152]	metabolic process [GO:0008152]	catalytic activity [GO:0003824]		25726842
A0A0D2MXM3	A0A0D2MXM3_9CHLO	unreviewed	Glutathione S-transferase (EC 2.5.1.18)	MNEG_0725	Monoraphidium neglectum			glutathione transferase activity [GO:0004364]		glutathione transferase activity [GO:0004364]		25726843
A0A0D2NSM2	A0A0D2NSM2_9CHLO	unreviewed	Ribosomal protein S13	MNEG_0726	Monoraphidium neglectum			ribosome [GO:0005840]; RNA binding [GO:0003723]; structural constituent of ribosome [GO:0003735]; translation [GO:0006412]	translation [GO:0006412]	RNA binding [GO:0003723]; structural constituent of ribosome [GO:0003735]	ribosome [GO:0005840]	25726844
A0A0D2N4M2	A0A0D2N4M2_9CHLO	unreviewed	Block of proliferation 1	MNEG_0727	Monoraphidium neglectum			rRNA processing [GO:0006364]	rRNA processing [GO:0006364]			25726845
A0A0D2MXL1	A0A0D2MXL1_9CHLO	unreviewed	Uncharacterized protein	MNEG_0728	Monoraphidium neglectum							25726846
A0A0D2NSK2	A0A0D2NSK2_9CHLO	unreviewed	NB-ARC domain-containing protein	MNEG_0729	Monoraphidium neglectum							25726847
A0A0D2N4K9	A0A0D2N4K9_9CHLO	unreviewed	Purple acid phosphatase (EC 3.1.3.2)	MNEG_0730	Monoraphidium neglectum		CATALYTIC ACTIVITY: A phosphate monoester + H(2)O = an alcohol + phosphate. {ECO:0000256|RuleBase:RU361203}.	acid phosphatase activity [GO:0003993]; metal ion binding [GO:0046872]		acid phosphatase activity [GO:0003993]; metal ion binding [GO:0046872]		25726848
A0A0D2KAC6	A0A0D2KAC6_9CHLO	unreviewed	Uncharacterized protein	MNEG_0731	Monoraphidium neglectum			integral component of membrane [GO:0016021]			integral component of membrane [GO:0016021]	25726849
A0A0D2LLJ4	A0A0D2LLJ4_9CHLO	unreviewed	Uncharacterized protein	MNEG_0732	Monoraphidium neglectum							25726850
A0A0D2MXL5	A0A0D2MXL5_9CHLO	unreviewed	Uncharacterized protein	MNEG_0733	Monoraphidium neglectum			integral component of membrane [GO:0016021]; nucleus [GO:0005634]; DNA binding [GO:0003677]; regulation of transcription, DNA-templated [GO:0006355]; transcription, DNA-templated [GO:0006351]	regulation of transcription, DNA-templated [GO:0006355]; transcription, DNA-templated [GO:0006351]	DNA binding [GO:0003677]	integral component of membrane [GO:0016021]; nucleus [GO:0005634]	25726851
A0A0D2NSK8	A0A0D2NSK8_9CHLO	unreviewed	Uncharacterized protein	MNEG_0734	Monoraphidium neglectum							25726852
A0A0D2N4L6	A0A0D2N4L6_9CHLO	unreviewed	Uncharacterized protein	MNEG_0735	Monoraphidium neglectum			ATP binding [GO:0005524]		ATP binding [GO:0005524]		25726853
A0A0D2KAD0	A0A0D2KAD0_9CHLO	unreviewed	Uncharacterized protein	MNEG_0736	Monoraphidium neglectum							25726854
A0A0D2LLJ6	A0A0D2LLJ6_9CHLO	unreviewed	Uncharacterized protein	MNEG_0737	Monoraphidium neglectum			integral component of membrane [GO:0016021]			integral component of membrane [GO:0016021]	25726855
A0A0D2NSJ0	A0A0D2NSJ0_9CHLO	unreviewed	Uncharacterized protein	MNEG_0738	Monoraphidium neglectum			integral component of membrane [GO:0016021]			integral component of membrane [GO:0016021]	25726856
A0A0D2N4K4	A0A0D2N4K4_9CHLO	unreviewed	tRNA-dihydrouridine synthase 3 (EC 1.-.-.-)	MNEG_0739	Monoraphidium neglectum			integral component of membrane [GO:0016021]; flavin adenine dinucleotide binding [GO:0050660]; tRNA dihydrouridine synthase activity [GO:0017150]		flavin adenine dinucleotide binding [GO:0050660]; tRNA dihydrouridine synthase activity [GO:0017150]	integral component of membrane [GO:0016021]	25726857
A0A0D2KAB6	A0A0D2KAB6_9CHLO	unreviewed	Uncharacterized protein	MNEG_0740	Monoraphidium neglectum							25726858
A0A0D2LLI7	A0A0D2LLI7_9CHLO	unreviewed	Uncharacterized protein	MNEG_0741	Monoraphidium neglectum							25726859
A0A0D2MXK9	A0A0D2MXK9_9CHLO	unreviewed	Uncharacterized protein	MNEG_0742	Monoraphidium neglectum							25726860
A0A0D2NSJ6	A0A0D2NSJ6_9CHLO	unreviewed	Chlorophyll a-b binding protein, chloroplastic	MNEG_0743	Monoraphidium neglectum			chloroplast thylakoid membrane [GO:0009535]; integral component of membrane [GO:0016021]; photosystem I [GO:0009522]; photosystem II [GO:0009523]; chlorophyll binding [GO:0016168]; photosynthesis, light harvesting [GO:0009765]; protein-chromophore linkage [GO:0018298]	photosynthesis, light harvesting [GO:0009765]; protein-chromophore linkage [GO:0018298]	chlorophyll binding [GO:0016168]	chloroplast thylakoid membrane [GO:0009535]; integral component of membrane [GO:0016021]; photosystem I [GO:0009522]; photosystem II [GO:0009523]	25726861
A0A0D2N4K6	A0A0D2N4K6_9CHLO	unreviewed	Uncharacterized protein	MNEG_0744	Monoraphidium neglectum							25726862
A0A0D2KAC1	A0A0D2KAC1_9CHLO	unreviewed	Uncharacterized protein	MNEG_0745	Monoraphidium neglectum							25726863
A0A0D2LLJ1	A0A0D2LLJ1_9CHLO	unreviewed	Ubiquitin-like modifier-activating enzyme 5	MNEG_0746	Monoraphidium neglectum			small protein activating enzyme activity [GO:0008641]		small protein activating enzyme activity [GO:0008641]		25726864
A0A0D2NSH6	A0A0D2NSH6_9CHLO	unreviewed	Uncharacterized protein	MNEG_0747	Monoraphidium neglectum							25726865
A0A0D2N4J2	A0A0D2N4J2_9CHLO	unreviewed	Abc transporter G family protein	MNEG_0748	Monoraphidium neglectum			integral component of membrane [GO:0016021]; ATP binding [GO:0005524]; ATPase activity [GO:0016887]		ATPase activity [GO:0016887]; ATP binding [GO:0005524]	integral component of membrane [GO:0016021]	25726866
A0A0D2KAA8	A0A0D2KAA8_9CHLO	unreviewed	Uncharacterized protein	MNEG_0749	Monoraphidium neglectum							25726867
A0A0D2LLI0	A0A0D2LLI0_9CHLO	unreviewed	Uncharacterized protein	MNEG_0750	Monoraphidium neglectum							25726868
A0A0D2MXJ9	A0A0D2MXJ9_9CHLO	unreviewed	Uncharacterized protein	MNEG_0751	Monoraphidium neglectum			calcium ion binding [GO:0005509]		calcium ion binding [GO:0005509]		25726869
A0A0D2NSI2	A0A0D2NSI2_9CHLO	unreviewed	Phosphate carrier protein	MNEG_0752	Monoraphidium neglectum			integral component of membrane [GO:0016021]; transport [GO:0006810]	transport [GO:0006810]		integral component of membrane [GO:0016021]	25726870
A0A0D2N4J6	A0A0D2N4J6_9CHLO	unreviewed	Uncharacterized protein	MNEG_0753	Monoraphidium neglectum							25726871
A0A0D2KAB1	A0A0D2KAB1_9CHLO	unreviewed	Uncharacterized protein	MNEG_0754	Monoraphidium neglectum							25726872
A0A0D2LLI4	A0A0D2LLI4_9CHLO	unreviewed	Putative lipid kinase (EC 2.7.1.-)	MNEG_0755	Monoraphidium neglectum			integral component of membrane [GO:0016021]; NAD+ kinase activity [GO:0003951]		NAD+ kinase activity [GO:0003951]	integral component of membrane [GO:0016021]	25726873
A0A0D2MXK3	A0A0D2MXK3_9CHLO	unreviewed	Uncharacterized protein (Fragment)	MNEG_0756	Monoraphidium neglectum							25726874
A0A0D2KA94	A0A0D2KA94_9CHLO	unreviewed	Uncharacterized protein	MNEG_0757	Monoraphidium neglectum							25726875
A0A0D2LLG6	A0A0D2LLG6_9CHLO	unreviewed	Uncharacterized protein	MNEG_0758	Monoraphidium neglectum							25726876
A0A0D2MXI9	A0A0D2MXI9_9CHLO	unreviewed	ABC transporter family protein (EC 3.6.3.44)	MNEG_0759	Monoraphidium neglectum			integral component of membrane [GO:0016021]; ATP binding [GO:0005524]; xenobiotic-transporting ATPase activity [GO:0008559]		ATP binding [GO:0005524]; xenobiotic-transporting ATPase activity [GO:0008559]	integral component of membrane [GO:0016021]	25726877
A0A0D2NSG4	A0A0D2NSG4_9CHLO	unreviewed	Uncharacterized protein	MNEG_0760	Monoraphidium neglectum			integral component of membrane [GO:0016021]; ATP binding [GO:0005524]; ATPase activity, coupled to transmembrane movement of substances [GO:0042626]		ATPase activity, coupled to transmembrane movement of substances [GO:0042626]; ATP binding [GO:0005524]	integral component of membrane [GO:0016021]	25726878
A0A0D2N4I6	A0A0D2N4I6_9CHLO	unreviewed	NADPH2:quinone reductase (EC 1.6.5.5)	MNEG_0761	Monoraphidium neglectum			NADPH:quinone reductase activity [GO:0003960]		NADPH:quinone reductase activity [GO:0003960]		25726879
A0A0D2KA99	A0A0D2KA99_9CHLO	unreviewed	Uncharacterized protein	MNEG_0762	Monoraphidium neglectum							25726880
A0A0D2LLH2	A0A0D2LLH2_9CHLO	unreviewed	Uncharacterized protein	MNEG_0763	Monoraphidium neglectum							25726881
A0A0D2MXJ1	A0A0D2MXJ1_9CHLO	unreviewed	Uncharacterized protein	MNEG_0764	Monoraphidium neglectum							25726882
A0A0D2NSH0	A0A0D2NSH0_9CHLO	unreviewed	Uncharacterized protein	MNEG_0765	Monoraphidium neglectum							25726883
A0A0D2N4I8	A0A0D2N4I8_9CHLO	unreviewed	Uncharacterized protein	MNEG_0766	Monoraphidium neglectum							25726884
A0A0D2KAA4	A0A0D2KAA4_9CHLO	unreviewed	Uncharacterized protein	MNEG_0767	Monoraphidium neglectum							25726885
A0A0D2LLH7	A0A0D2LLH7_9CHLO	unreviewed	Uncharacterized protein	MNEG_0768	Monoraphidium neglectum							25726886
A0A0D2MXJ5	A0A0D2MXJ5_9CHLO	unreviewed	Uncharacterized protein	MNEG_0769	Monoraphidium neglectum							25726887
A0A0D2MXI3	A0A0D2MXI3_9CHLO	unreviewed	Uncharacterized protein	MNEG_0770	Monoraphidium neglectum							25726888
A0A0D2NSF2	A0A0D2NSF2_9CHLO	unreviewed	Uncharacterized protein	MNEG_0771	Monoraphidium neglectum			nucleus [GO:0005634]; DNA binding [GO:0003677]; transcription factor activity, sequence-specific DNA binding [GO:0003700]; multicellular organism development [GO:0007275]; transcription, DNA-templated [GO:0006351]	multicellular organism development [GO:0007275]; transcription, DNA-templated [GO:0006351]	DNA binding [GO:0003677]; transcription factor activity, sequence-specific DNA binding [GO:0003700]	nucleus [GO:0005634]	25726889
A0A0D2N4H8	A0A0D2N4H8_9CHLO	unreviewed	Uncharacterized protein	MNEG_0772	Monoraphidium neglectum							25726890
A0A0D2KA90	A0A0D2KA90_9CHLO	unreviewed	Programmed cell death 6-interacting protein	MNEG_0773	Monoraphidium neglectum							25726891
A0A0D2LLG1	A0A0D2LLG1_9CHLO	unreviewed	Uncharacterized protein	MNEG_0774	Monoraphidium neglectum							25726892
A0A0D2MXI6	A0A0D2MXI6_9CHLO	unreviewed	Heterogeneous nuclear ribonucleoprotein Q	MNEG_0775	Monoraphidium neglectum			intracellular ribonucleoprotein complex [GO:0030529]; viral nucleocapsid [GO:0019013]; RNA binding [GO:0003723]		RNA binding [GO:0003723]	intracellular ribonucleoprotein complex [GO:0030529]; viral nucleocapsid [GO:0019013]	25726893
A0A0D2NSF7	A0A0D2NSF7_9CHLO	unreviewed	Uncharacterized protein	MNEG_0776	Monoraphidium neglectum							25726894
A0A0D2N4I0	A0A0D2N4I0_9CHLO	unreviewed	Uncharacterized protein	MNEG_0777	Monoraphidium neglectum							25726895
A0A0D2MXH8	A0A0D2MXH8_9CHLO	unreviewed	Malate dehydrogenase (EC 1.1.1.37)	MNEG_0778	Monoraphidium neglectum		CATALYTIC ACTIVITY: (S)-malate + NAD(+) = oxaloacetate + NADH. {ECO:0000256|RuleBase:RU003405}.	L-malate dehydrogenase activity [GO:0030060]; malate dehydrogenase (NADP+) activity [GO:0046554]; carbohydrate metabolic process [GO:0005975]; malate metabolic process [GO:0006108]; tricarboxylic acid cycle [GO:0006099]	carbohydrate metabolic process [GO:0005975]; malate metabolic process [GO:0006108]; tricarboxylic acid cycle [GO:0006099]	L-malate dehydrogenase activity [GO:0030060]; malate dehydrogenase (NADP+) activity [GO:0046554]		25726896
A0A0D2NSD8	A0A0D2NSD8_9CHLO	unreviewed	Uncharacterized protein	MNEG_0779	Monoraphidium neglectum			cell [GO:0005623]; cell redox homeostasis [GO:0045454]	cell redox homeostasis [GO:0045454]		cell [GO:0005623]	25726897
A0A0D2N4H2	A0A0D2N4H2_9CHLO	unreviewed	Putative aarF domain-containing protein kinase (EC 2.7.-.-)	MNEG_0780	Monoraphidium neglectum			ATP binding [GO:0005524]; protein kinase activity [GO:0004672]		ATP binding [GO:0005524]; protein kinase activity [GO:0004672]		25726898
A0A0D2KA81	A0A0D2KA81_9CHLO	unreviewed	Uncharacterized protein	MNEG_0781	Monoraphidium neglectum			cellular response to phosphate starvation [GO:0016036]	cellular response to phosphate starvation [GO:0016036]			25726899
A0A0D2LLF7	A0A0D2LLF7_9CHLO	unreviewed	Uncharacterized protein	MNEG_0782	Monoraphidium neglectum							25726900
A0A0D2MXI1	A0A0D2MXI1_9CHLO	unreviewed	Qc-SNARE protein, SFT1 family	MNEG_0783	Monoraphidium neglectum			integral component of membrane [GO:0016021]			integral component of membrane [GO:0016021]	25726901
A0A0D2NSE5	A0A0D2NSE5_9CHLO	unreviewed	E3 ubiquitin-protein ligase NEDD4 (EC 6.3.2.19)	MNEG_0784	Monoraphidium neglectum		CATALYTIC ACTIVITY: S-ubiquitinyl-[E2 ubiquitin-conjugating enzyme]-L-cysteine + [acceptor protein]-L-lysine = [E2 ubiquitin-conjugating enzyme]-L-cysteine + N(6)-ubiquitinyl-[acceptor protein]-L-lysine. {ECO:0000256|SAAS:SAAS00628607}.	ligase activity [GO:0016874]; ubiquitin-protein transferase activity [GO:0004842]		ligase activity [GO:0016874]; ubiquitin-protein transferase activity [GO:0004842]		25726902
A0A0D2N4H3	A0A0D2N4H3_9CHLO	unreviewed	Uncharacterized protein	MNEG_0785	Monoraphidium neglectum							25726903
A0A0D2KA84	A0A0D2KA84_9CHLO	unreviewed	Histone acetyltransferase (EC 2.3.1.48)	MNEG_0786	Monoraphidium neglectum		CATALYTIC ACTIVITY: Acetyl-CoA + [protein]-L-lysine = CoA + [protein]-N(6)-acetyl-L-lysine. {ECO:0000256|RuleBase:RU361211}.	nucleus [GO:0005634]; histone acetyltransferase activity [GO:0004402]; regulation of transcription, DNA-templated [GO:0006355]	regulation of transcription, DNA-templated [GO:0006355]	histone acetyltransferase activity [GO:0004402]	nucleus [GO:0005634]	25726904
A0A0D2LLF9	A0A0D2LLF9_9CHLO	unreviewed	Uncharacterized protein	MNEG_0787	Monoraphidium neglectum							25726905
A0A0D2LLE9	A0A0D2LLE9_9CHLO	unreviewed	Spindle pole body protein (Fragment)	MNEG_0788	Monoraphidium neglectum							25726906
A0A0D2MXH6	A0A0D2MXH6_9CHLO	unreviewed	Putative lipoprotein	MNEG_0789	Monoraphidium neglectum							25726907
A0A0D2NSD2	A0A0D2NSD2_9CHLO	unreviewed	Uncharacterized protein	MNEG_0790	Monoraphidium neglectum			integral component of membrane [GO:0016021]			integral component of membrane [GO:0016021]	25726908
A0A0D2N4G8	A0A0D2N4G8_9CHLO	unreviewed	Putative zinc metalloprotease (EC 3.4.24.-)	MNEG_0791	Monoraphidium neglectum			integral component of membrane [GO:0016021]; metalloendopeptidase activity [GO:0004222]		metalloendopeptidase activity [GO:0004222]	integral component of membrane [GO:0016021]	25726909
A0A0D2KA77	A0A0D2KA77_9CHLO	unreviewed	Uncharacterized protein	MNEG_0792	Monoraphidium neglectum							25726910
A0A0D2LLF1	A0A0D2LLF1_9CHLO	unreviewed	Putative metal chaperone yciC	MNEG_0793	Monoraphidium neglectum							25726911
A0A0D2N4G1	A0A0D2N4G1_9CHLO	unreviewed	Uncharacterized protein	MNEG_0794	Monoraphidium neglectum			integral component of membrane [GO:0016021]			integral component of membrane [GO:0016021]	25726912
A0A0D2KA67	A0A0D2KA67_9CHLO	unreviewed	Uncharacterized protein	MNEG_0795	Monoraphidium neglectum							25726913
A0A0D2LLD6	A0A0D2LLD6_9CHLO	unreviewed	Uncharacterized protein	MNEG_0796	Monoraphidium neglectum			catalytic activity [GO:0003824]; coenzyme binding [GO:0050662]		catalytic activity [GO:0003824]; coenzyme binding [GO:0050662]		25726914
A0A0D2MXG8	A0A0D2MXG8_9CHLO	unreviewed	NAD dependent epimerase/dehydratase family	MNEG_0797	Monoraphidium neglectum			catalytic activity [GO:0003824]; coenzyme binding [GO:0050662]		catalytic activity [GO:0003824]; coenzyme binding [GO:0050662]		25726915
A0A0D2NSC3	A0A0D2NSC3_9CHLO	unreviewed	Protein P80	MNEG_0798	Monoraphidium neglectum							25726916
A0A0D2N4G3	A0A0D2N4G3_9CHLO	unreviewed	Uncharacterized protein	MNEG_0799	Monoraphidium neglectum			integral component of membrane [GO:0016021]			integral component of membrane [GO:0016021]	25726917
A0A0D2KA71	A0A0D2KA71_9CHLO	unreviewed	Protein P80	MNEG_0800	Monoraphidium neglectum			integral component of membrane [GO:0016021]; copper ion transmembrane transporter activity [GO:0005375]		copper ion transmembrane transporter activity [GO:0005375]	integral component of membrane [GO:0016021]	25726918
A0A0D2LLE6	A0A0D2LLE6_9CHLO	unreviewed	Amidohydrolase (EC 3.4.13.9)	MNEG_0801	Monoraphidium neglectum			hydrolase activity, acting on carbon-nitrogen (but not peptide) bonds [GO:0016810]; proline dipeptidase activity [GO:0102009]		hydrolase activity, acting on carbon-nitrogen (but not peptide) bonds [GO:0016810]; proline dipeptidase activity [GO:0102009]		25726919
A0A0D2MXH3	A0A0D2MXH3_9CHLO	unreviewed	Uncharacterized protein	MNEG_0802	Monoraphidium neglectum			hydrolase activity [GO:0016787]		hydrolase activity [GO:0016787]		25726920
A0A0D2NSC6	A0A0D2NSC6_9CHLO	unreviewed	Chaperone protein dnaJ 6	MNEG_0803	Monoraphidium neglectum							25726921
A0A0D2N4G6	A0A0D2N4G6_9CHLO	unreviewed	Amino acid transporter	MNEG_0804	Monoraphidium neglectum			integral component of membrane [GO:0016021]; protein dimerization activity [GO:0046983]		protein dimerization activity [GO:0046983]	integral component of membrane [GO:0016021]	25726922
A0A0D2KA73	A0A0D2KA73_9CHLO	unreviewed	Brefeldin A-inhibited guanine nucleotide-exchange protein 2 (Fragment)	MNEG_0805	Monoraphidium neglectum			ARF guanyl-nucleotide exchange factor activity [GO:0005086]; regulation of ARF protein signal transduction [GO:0032012]	regulation of ARF protein signal transduction [GO:0032012]	ARF guanyl-nucleotide exchange factor activity [GO:0005086]		25726923
A0A0D2MXD6	A0A0D2MXD6_9CHLO	unreviewed	Uncharacterized protein	MNEG_0806	Monoraphidium neglectum			COPII vesicle coat [GO:0030127]; ER to Golgi vesicle-mediated transport [GO:0006888]; intracellular protein transport [GO:0006886]	ER to Golgi vesicle-mediated transport [GO:0006888]; intracellular protein transport [GO:0006886]		COPII vesicle coat [GO:0030127]	25726924
A0A0D2NSA2	A0A0D2NSA2_9CHLO	unreviewed	Carnitine/acylcarnitine carrier-like protein	MNEG_0807	Monoraphidium neglectum			integral component of membrane [GO:0016021]; transport [GO:0006810]	transport [GO:0006810]		integral component of membrane [GO:0016021]	25726925
A0A0D2N4E4	A0A0D2N4E4_9CHLO	unreviewed	Beta-carotene ketolase (EC 1.13.-.-)	MNEG_0808	Monoraphidium neglectum			integral component of membrane [GO:0016021]; oxidoreductase activity [GO:0016491]; lipid metabolic process [GO:0006629]	lipid metabolic process [GO:0006629]	oxidoreductase activity [GO:0016491]	integral component of membrane [GO:0016021]	25726926
A0A0D2KA48	A0A0D2KA48_9CHLO	unreviewed	Uncharacterized protein	MNEG_0809	Monoraphidium neglectum			ATP binding [GO:0005524]; protein kinase activity [GO:0004672]		ATP binding [GO:0005524]; protein kinase activity [GO:0004672]		25726927
A0A0D2LLB4	A0A0D2LLB4_9CHLO	unreviewed	Acetyl-CoA carboxylase, biotin carboxylase (EC 6.4.1.2)	MNEG_0810	Monoraphidium neglectum			acetyl-CoA carboxylase activity [GO:0003989]; ATP binding [GO:0005524]; biotin carboxylase activity [GO:0004075]; metal ion binding [GO:0046872]		acetyl-CoA carboxylase activity [GO:0003989]; ATP binding [GO:0005524]; biotin carboxylase activity [GO:0004075]; metal ion binding [GO:0046872]		25726928
A0A0D2MXG1	A0A0D2MXG1_9CHLO	unreviewed	Uncharacterized protein	MNEG_0811	Monoraphidium neglectum			integral component of membrane [GO:0016021]			integral component of membrane [GO:0016021]	25726929
A0A0D2NSB8	A0A0D2NSB8_9CHLO	unreviewed	Uncharacterized protein	MNEG_0812	Monoraphidium neglectum							25726930
A0A0D2LL93	A0A0D2LL93_9CHLO	unreviewed	Uncharacterized protein	MNEG_0813	Monoraphidium neglectum			integral component of membrane [GO:0016021]; ATP binding [GO:0005524]; ATPase activity [GO:0016887]		ATPase activity [GO:0016887]; ATP binding [GO:0005524]	integral component of membrane [GO:0016021]	25726931
A0A0D2MXC1	A0A0D2MXC1_9CHLO	unreviewed	O-methyltransferase family protein (EC 2.1.1.-)	MNEG_0814	Monoraphidium neglectum			integral component of membrane [GO:0016021]; O-methyltransferase activity [GO:0008171]		O-methyltransferase activity [GO:0008171]	integral component of membrane [GO:0016021]	25726932
A0A0D2NS92	A0A0D2NS92_9CHLO	unreviewed	Aldo-keto reductase, putative (EC 1.1.1.21)	MNEG_0815	Monoraphidium neglectum			alditol:NADP+ 1-oxidoreductase activity [GO:0004032]		alditol:NADP+ 1-oxidoreductase activity [GO:0004032]		25726933
A0A0D2N4C5	A0A0D2N4C5_9CHLO	unreviewed	50S ribosomal protein L15	MNEG_0816	Monoraphidium neglectum			large ribosomal subunit [GO:0015934]; structural constituent of ribosome [GO:0003735]; translation [GO:0006412]	translation [GO:0006412]	structural constituent of ribosome [GO:0003735]	large ribosomal subunit [GO:0015934]	25726934
A0A0D2KA38	A0A0D2KA38_9CHLO	unreviewed	60S ribosomal protein L6	MNEG_0817	Monoraphidium neglectum			ribosome [GO:0005840]; structural constituent of ribosome [GO:0003735]; translation [GO:0006412]	translation [GO:0006412]	structural constituent of ribosome [GO:0003735]	ribosome [GO:0005840]	25726935
A0A0D2LLA2	A0A0D2LLA2_9CHLO	unreviewed	Uncharacterized protein	MNEG_0818	Monoraphidium neglectum							25726936
A0A0D2MXC7	A0A0D2MXC7_9CHLO	unreviewed	50S ribosomal protein L11	MNEG_0819	Monoraphidium neglectum			ribosome [GO:0005840]; structural constituent of ribosome [GO:0003735]; translation [GO:0006412]	translation [GO:0006412]	structural constituent of ribosome [GO:0003735]	ribosome [GO:0005840]	25726937
A0A0D2NS97	A0A0D2NS97_9CHLO	unreviewed	Uncharacterized protein	MNEG_0820	Monoraphidium neglectum							25726938
A0A0D2N4D5	A0A0D2N4D5_9CHLO	unreviewed	Uncharacterized protein	MNEG_0821	Monoraphidium neglectum			ATP binding [GO:0005524]; protein kinase activity [GO:0004672]		ATP binding [GO:0005524]; protein kinase activity [GO:0004672]		25726939
A0A0D2KA43	A0A0D2KA43_9CHLO	unreviewed	Leishmanolysin-like peptidase (EC 3.4.24.-)	MNEG_0822	Monoraphidium neglectum			membrane [GO:0016020]; metalloendopeptidase activity [GO:0004222]; cell adhesion [GO:0007155]	cell adhesion [GO:0007155]	metalloendopeptidase activity [GO:0004222]	membrane [GO:0016020]	25726940
A0A0D2LLA8	A0A0D2LLA8_9CHLO	unreviewed	Zinc-metallopeptidase-like protein	MNEG_0823	Monoraphidium neglectum							25726941
A0A0D2MXA8	A0A0D2MXA8_9CHLO	unreviewed	Protein strawberry notch	MNEG_0824	Monoraphidium neglectum			regulation of transcription, DNA-templated [GO:0006355]	regulation of transcription, DNA-templated [GO:0006355]			25726942
A0A0D2NS79	A0A0D2NS79_9CHLO	unreviewed	Uncharacterized protein	MNEG_0825	Monoraphidium neglectum			RNA binding [GO:0003723]		RNA binding [GO:0003723]		25726943
A0A0D2N4A9	A0A0D2N4A9_9CHLO	unreviewed	Cystinosin	MNEG_0826	Monoraphidium neglectum			integral component of membrane [GO:0016021]			integral component of membrane [GO:0016021]	25726944
A0A0D2KA27	A0A0D2KA27_9CHLO	unreviewed	Uncharacterized protein	MNEG_0827	Monoraphidium neglectum							25726945
A0A0D2LL87	A0A0D2LL87_9CHLO	unreviewed	Uncharacterized protein	MNEG_0828	Monoraphidium neglectum							25726946
A0A0D2MXB5	A0A0D2MXB5_9CHLO	unreviewed	Uncharacterized protein	MNEG_0829	Monoraphidium neglectum							25726947
A0A0D2NS86	A0A0D2NS86_9CHLO	unreviewed	Uncharacterized protein	MNEG_0830	Monoraphidium neglectum			integral component of membrane [GO:0016021]; intracellular [GO:0005622]; phosphorus-oxygen lyase activity [GO:0016849]; cyclic nucleotide biosynthetic process [GO:0009190]; intracellular signal transduction [GO:0035556]	cyclic nucleotide biosynthetic process [GO:0009190]; intracellular signal transduction [GO:0035556]	phosphorus-oxygen lyase activity [GO:0016849]	integral component of membrane [GO:0016021]; intracellular [GO:0005622]	25726948
A0A0D2N4B6	A0A0D2N4B6_9CHLO	unreviewed	Uncharacterized protein	MNEG_0831	Monoraphidium neglectum							25726949
A0A0D2KA32	A0A0D2KA32_9CHLO	unreviewed	Serine/threonine-protein kinase CTR1 (EC 2.7.11.1)	MNEG_0832	Monoraphidium neglectum			ATP binding [GO:0005524]; protein kinase activity [GO:0004672]		ATP binding [GO:0005524]; protein kinase activity [GO:0004672]		25726950
A0A0D2N494	A0A0D2N494_9CHLO	unreviewed	AP2-like ethylene-responsive transcription factor (EC 1.3.1.74)	MNEG_0833	Monoraphidium neglectum			nucleus [GO:0005634]; 2-alkenal reductase [NAD(P)] activity [GO:0032440]; DNA binding [GO:0003677]; transcription factor activity, sequence-specific DNA binding [GO:0003700]; multicellular organism development [GO:0007275]; transcription, DNA-templated [GO:0006351]	multicellular organism development [GO:0007275]; transcription, DNA-templated [GO:0006351]	2-alkenal reductase [NAD(P)] activity [GO:0032440]; DNA binding [GO:0003677]; transcription factor activity, sequence-specific DNA binding [GO:0003700]	nucleus [GO:0005634]	25726951
A0A0D2KA15	A0A0D2KA15_9CHLO	unreviewed	Uncharacterized protein	MNEG_0834	Monoraphidium neglectum			integral component of membrane [GO:0016021]			integral component of membrane [GO:0016021]	25726952
A0A0D2LL72	A0A0D2LL72_9CHLO	unreviewed	Uncharacterized protein	MNEG_0835	Monoraphidium neglectum							25726953
A0A0D2MXA3	A0A0D2MXA3_9CHLO	unreviewed	Putative chaperone protein HSP31 (EC 3.2.-.-)	MNEG_0836	Monoraphidium neglectum			hydrolase activity, acting on glycosyl bonds [GO:0016798]; metabolic process [GO:0008152]	metabolic process [GO:0008152]	hydrolase activity, acting on glycosyl bonds [GO:0016798]		25726954
A0A0D2NS74	A0A0D2NS74_9CHLO	unreviewed	Dual-specificity tyrosine-(Y)-phosphorylation regulated kinase (EC 2.7.12.1)	MNEG_0837	Monoraphidium neglectum			integral component of membrane [GO:0016021]; ATP binding [GO:0005524]; protein serine/threonine/tyrosine kinase activity [GO:0004712]		ATP binding [GO:0005524]; protein serine/threonine/tyrosine kinase activity [GO:0004712]	integral component of membrane [GO:0016021]	25726955
A0A0D2N4A2	A0A0D2N4A2_9CHLO	unreviewed	Zinc finger CCCH domain-containing protein	MNEG_0838	Monoraphidium neglectum			metal ion binding [GO:0046872]		metal ion binding [GO:0046872]		25726956
A0A0D2KA20	A0A0D2KA20_9CHLO	unreviewed	Glycosyltransferase (EC 2.4.1.-)	MNEG_0839	Monoraphidium neglectum			transferase activity, transferring hexosyl groups [GO:0016758]; metabolic process [GO:0008152]	metabolic process [GO:0008152]	transferase activity, transferring hexosyl groups [GO:0016758]		25726957
A0A0D2LL79	A0A0D2LL79_9CHLO	unreviewed	Uncharacterized protein	MNEG_0840	Monoraphidium neglectum			ATP binding [GO:0005524]; protein kinase activity [GO:0004672]		ATP binding [GO:0005524]; protein kinase activity [GO:0004672]		25726958
A0A0D2KA06	A0A0D2KA06_9CHLO	unreviewed	Component of oligomeric golgi complex 4	MNEG_0841	Monoraphidium neglectum							25726959
A0A0D2LL61	A0A0D2LL61_9CHLO	unreviewed	Putative acetyltransferase NSI	MNEG_0842	Monoraphidium neglectum			N-acetyltransferase activity [GO:0008080]		N-acetyltransferase activity [GO:0008080]		25726960
A0A0D2MX89	A0A0D2MX89_9CHLO	unreviewed	Uncharacterized protein	MNEG_0843	Monoraphidium neglectum							25726961
A0A0D2NS60	A0A0D2NS60_9CHLO	unreviewed	Uncharacterized protein	MNEG_0844	Monoraphidium neglectum							25726962
A0A0D2N486	A0A0D2N486_9CHLO	unreviewed	Uncharacterized protein	MNEG_0845	Monoraphidium neglectum							25726963
A0A0D2KA11	A0A0D2KA11_9CHLO	unreviewed	Uncharacterized protein	MNEG_0846	Monoraphidium neglectum							25726964
A0A0D2LL67	A0A0D2LL67_9CHLO	unreviewed	ATP-dependent helicase STH1/SNF2 (EC 3.6.1.-)	MNEG_0847	Monoraphidium neglectum			ATP binding [GO:0005524]; helicase activity [GO:0004386]		ATP binding [GO:0005524]; helicase activity [GO:0004386]		25726965
A0A0D2MX96	A0A0D2MX96_9CHLO	unreviewed	Uncharacterized protein	MNEG_0848	Monoraphidium neglectum							25726966
A0A0D2NS68	A0A0D2NS68_9CHLO	unreviewed	Ankyrin-3	MNEG_0849	Monoraphidium neglectum							25726967
A0A0D2MX75	A0A0D2MX75_9CHLO	unreviewed	Uncharacterized protein	MNEG_0850	Monoraphidium neglectum			3'-5' exonuclease activity [GO:0008408]; nucleic acid binding [GO:0003676]		3'-5' exonuclease activity [GO:0008408]; nucleic acid binding [GO:0003676]		25726968
A0A0D2NS43	A0A0D2NS43_9CHLO	unreviewed	Uncharacterized protein	MNEG_0851	Monoraphidium neglectum							25726969
A0A0D2N472	A0A0D2N472_9CHLO	unreviewed	Uncharacterized protein	MNEG_0852	Monoraphidium neglectum			integral component of membrane [GO:0016021]			integral component of membrane [GO:0016021]	25726970
A0A0D2KA00	A0A0D2KA00_9CHLO	unreviewed	Uncharacterized protein	MNEG_0853	Monoraphidium neglectum							25726971
A0A0D2LL55	A0A0D2LL55_9CHLO	unreviewed	Uncharacterized protein	MNEG_0854	Monoraphidium neglectum							25726972
A0A0D2MX82	A0A0D2MX82_9CHLO	unreviewed	Uncharacterized protein	MNEG_0855	Monoraphidium neglectum							25726973
A0A0D2NS52	A0A0D2NS52_9CHLO	unreviewed	O-phosphoseryl-tRNA(Sec) selenium transferase (EC 2.9.1.2) (Selenocysteine synthase) (Selenocysteinyl-tRNA(Sec) synthase) (Sep-tRNA:Sec-tRNA synthase)	MNEG_0856	Monoraphidium neglectum	PATHWAY: Aminoacyl-tRNA biosynthesis; selenocysteinyl-tRNA(Sec) biosynthesis; selenocysteinyl-tRNA(Sec) from L-seryl-tRNA(Sec) (archaeal/eukaryal route): step 2/2. {ECO:0000256|PIRNR:PIRNR017689}.	CATALYTIC ACTIVITY: O-phospho-L-seryl-tRNA(Sec) + selenophosphate + H(2)O = L-selenocysteinyl-tRNA(Sec) + 2 phosphate. {ECO:0000256|PIRNR:PIRNR017689}.	cytoplasm [GO:0005737]; transferase activity, transferring selenium-containing groups [GO:0016785]; tRNA binding [GO:0000049]; selenocysteinyl-tRNA(Sec) biosynthetic process [GO:0097056]; translation [GO:0006412]	selenocysteinyl-tRNA(Sec) biosynthetic process [GO:0097056]; translation [GO:0006412]	transferase activity, transferring selenium-containing groups [GO:0016785]; tRNA binding [GO:0000049]	cytoplasm [GO:0005737]	25726974
A0A0D2N481	A0A0D2N481_9CHLO	unreviewed	Tetratricopeptide repeat and ankyrin repeat containing 1	MNEG_0857	Monoraphidium neglectum			ATP binding [GO:0005524]; hydrolase activity [GO:0016787]		ATP binding [GO:0005524]; hydrolase activity [GO:0016787]		25726975
A0A0D2K9Z0	A0A0D2K9Z0_9CHLO	unreviewed	Ion transport 2 domain protein (EC 2.3.1.9)	MNEG_0858	Monoraphidium neglectum			voltage-gated potassium channel complex [GO:0008076]; acetyl-CoA C-acetyltransferase activity [GO:0003985]; voltage-gated potassium channel activity [GO:0005249]		acetyl-CoA C-acetyltransferase activity [GO:0003985]; voltage-gated potassium channel activity [GO:0005249]	voltage-gated potassium channel complex [GO:0008076]	25726976
A0A0D2LL44	A0A0D2LL44_9CHLO	unreviewed	Uncharacterized protein	MNEG_0859	Monoraphidium neglectum							25726977
A0A0D2MX67	A0A0D2MX67_9CHLO	unreviewed	Uncharacterized protein	MNEG_0860	Monoraphidium neglectum							25726978
A0A0D2NS38	A0A0D2NS38_9CHLO	unreviewed	Uncharacterized protein	MNEG_0861	Monoraphidium neglectum							25726979
A0A0D2N466	A0A0D2N466_9CHLO	unreviewed	Uncharacterized protein	MNEG_0862	Monoraphidium neglectum			voltage-gated potassium channel complex [GO:0008076]; voltage-gated potassium channel activity [GO:0005249]		voltage-gated potassium channel activity [GO:0005249]	voltage-gated potassium channel complex [GO:0008076]	25726980
A0A0D2K9Z6	A0A0D2K9Z6_9CHLO	unreviewed	Metal tolerance protein C4	MNEG_0863	Monoraphidium neglectum			integral component of membrane [GO:0016021]; cation transmembrane transporter activity [GO:0008324]		cation transmembrane transporter activity [GO:0008324]	integral component of membrane [GO:0016021]	25726981
A0A0D2LL48	A0A0D2LL48_9CHLO	unreviewed	Uncharacterized protein (Fragment)	MNEG_0864	Monoraphidium neglectum							25726982
A0A0D2NS19	A0A0D2NS19_9CHLO	unreviewed	Uncharacterized protein	MNEG_0865	Monoraphidium neglectum							25726983
A0A0D2N443	A0A0D2N443_9CHLO	unreviewed	Uncharacterized protein	MNEG_0866	Monoraphidium neglectum							25726984
A0A0D2K9Y0	A0A0D2K9Y0_9CHLO	unreviewed	Uncharacterized protein	MNEG_0867	Monoraphidium neglectum							25726985
A0A0D2LL26	A0A0D2LL26_9CHLO	unreviewed	Set1/Ash2 histone methyltransferase complex subunit ASH2	MNEG_0868	Monoraphidium neglectum			methyltransferase activity [GO:0008168]		methyltransferase activity [GO:0008168]		25726986
A0A0D2MX53	A0A0D2MX53_9CHLO	unreviewed	Uncharacterized protein	MNEG_0869	Monoraphidium neglectum			extrinsic component of membrane [GO:0019898]; photosystem II oxygen evolving complex [GO:0009654]; calcium ion binding [GO:0005509]; photosynthesis [GO:0015979]	photosynthesis [GO:0015979]	calcium ion binding [GO:0005509]	extrinsic component of membrane [GO:0019898]; photosystem II oxygen evolving complex [GO:0009654]	25726987
A0A0D2NS26	A0A0D2NS26_9CHLO	unreviewed	Aminomethyltransferase (EC 2.1.2.10)	MNEG_0870	Monoraphidium neglectum			aminomethyltransferase activity [GO:0004047]		aminomethyltransferase activity [GO:0004047]		25726988
A0A0D2N452	A0A0D2N452_9CHLO	unreviewed	Uncharacterized protein	MNEG_0871	Monoraphidium neglectum							25726989
A0A0D2K9Y5	A0A0D2K9Y5_9CHLO	unreviewed	Uncharacterized protein	MNEG_0872	Monoraphidium neglectum							25726990
A0A0D2LL36	A0A0D2LL36_9CHLO	unreviewed	Uncharacterized protein	MNEG_0873	Monoraphidium neglectum							25726991
A0A0D2MX59	A0A0D2MX59_9CHLO	unreviewed	Uncharacterized protein	MNEG_0874	Monoraphidium neglectum							25726992
A0A0D2NS31	A0A0D2NS31_9CHLO	unreviewed	Uncharacterized protein	MNEG_0875	Monoraphidium neglectum							25726993
A0A0D2N459	A0A0D2N459_9CHLO	unreviewed	Uncharacterized protein	MNEG_0876	Monoraphidium neglectum			ATP binding [GO:0005524]; protein kinase activity [GO:0004672]		ATP binding [GO:0005524]; protein kinase activity [GO:0004672]		25726994
A0A0D2K9W8	A0A0D2K9W8_9CHLO	unreviewed	Uncharacterized protein (Fragment)	MNEG_0877	Monoraphidium neglectum							25726995
A0A0D2LL12	A0A0D2LL12_9CHLO	unreviewed	Proto-oncogene tyrosine-protein kinase LCK	MNEG_0878	Monoraphidium neglectum			ATP binding [GO:0005524]; protein kinase activity [GO:0004672]		ATP binding [GO:0005524]; protein kinase activity [GO:0004672]		25726996
A0A0D2MX35	A0A0D2MX35_9CHLO	unreviewed	O-methyltransferase, family 2 O-methyltransferase (EC 2.1.1.-)	MNEG_0879	Monoraphidium neglectum			O-methyltransferase activity [GO:0008171]		O-methyltransferase activity [GO:0008171]		25726997
A0A0D2NS12	A0A0D2NS12_9CHLO	unreviewed	Uncharacterized protein	MNEG_0880	Monoraphidium neglectum			O-methyltransferase activity [GO:0008171]		O-methyltransferase activity [GO:0008171]		25726998
A0A0D2N432	A0A0D2N432_9CHLO	unreviewed	Uncharacterized protein	MNEG_0881	Monoraphidium neglectum							25726999
A0A0D2K9X3	A0A0D2K9X3_9CHLO	unreviewed	Putative serine/threonine-protein (EC 2.7.11.1)	MNEG_0882	Monoraphidium neglectum			ATP binding [GO:0005524]; protein kinase activity [GO:0004672]		ATP binding [GO:0005524]; protein kinase activity [GO:0004672]		25727000
A0A0D2LL15	A0A0D2LL15_9CHLO	unreviewed	Uncharacterized protein	MNEG_0883	Monoraphidium neglectum			integral component of membrane [GO:0016021]; intracellular [GO:0005622]; phosphorus-oxygen lyase activity [GO:0016849]; cyclic nucleotide biosynthetic process [GO:0009190]; intracellular signal transduction [GO:0035556]	cyclic nucleotide biosynthetic process [GO:0009190]; intracellular signal transduction [GO:0035556]	phosphorus-oxygen lyase activity [GO:0016849]	integral component of membrane [GO:0016021]; intracellular [GO:0005622]	25727001
A0A0D2MX44	A0A0D2MX44_9CHLO	unreviewed	Uncharacterized protein	MNEG_0884	Monoraphidium neglectum							25727002
A0A0D2LL05	A0A0D2LL05_9CHLO	unreviewed	Uncharacterized protein	MNEG_0885	Monoraphidium neglectum							25727003
A0A0D2MX25	A0A0D2MX25_9CHLO	unreviewed	Uncharacterized protein	MNEG_0886	Monoraphidium neglectum							25727004
A0A0D2NS07	A0A0D2NS07_9CHLO	unreviewed	3-methylcrotonyl-CoA carboxylase alpha subunit (EC 6.4.1.4)	MNEG_0887	Monoraphidium neglectum			ATP binding [GO:0005524]; biotin carboxylase activity [GO:0004075]; metal ion binding [GO:0046872]; methylcrotonoyl-CoA carboxylase activity [GO:0004485]		ATP binding [GO:0005524]; biotin carboxylase activity [GO:0004075]; metal ion binding [GO:0046872]; methylcrotonoyl-CoA carboxylase activity [GO:0004485]		25727005
A0A0D2N424	A0A0D2N424_9CHLO	unreviewed	Double stranded RNA-binding protein	MNEG_0888	Monoraphidium neglectum							25727006
A0A0D2NRZ3	A0A0D2NRZ3_9CHLO	unreviewed	Uncharacterized protein (Fragment)	MNEG_0889	Monoraphidium neglectum							25727007
A0A0D2N406	A0A0D2N406_9CHLO	unreviewed	Uncharacterized protein	MNEG_0890	Monoraphidium neglectum			integral component of membrane [GO:0016021]			integral component of membrane [GO:0016021]	25727008
A0A0D2K9V7	A0A0D2K9V7_9CHLO	unreviewed	Basal body protein	MNEG_0891	Monoraphidium neglectum							25727009
A0A0D2LKZ9	A0A0D2LKZ9_9CHLO	unreviewed	Uncharacterized protein	MNEG_0892	Monoraphidium neglectum							25727010
A0A0D2MX19	A0A0D2MX19_9CHLO	unreviewed	Uncharacterized protein	MNEG_0893	Monoraphidium neglectum							25727011
A0A0D2NS00	A0A0D2NS00_9CHLO	unreviewed	60S ribosomal protein L30	MNEG_0894	Monoraphidium neglectum			ribosome [GO:0005840]; structural constituent of ribosome [GO:0003735]; translation [GO:0006412]	translation [GO:0006412]	structural constituent of ribosome [GO:0003735]	ribosome [GO:0005840]	25727012
A0A0D2N416	A0A0D2N416_9CHLO	unreviewed	Uncharacterized protein	MNEG_0895	Monoraphidium neglectum							25727013
A0A0D2K9W2	A0A0D2K9W2_9CHLO	unreviewed	Uncharacterized protein	MNEG_0896	Monoraphidium neglectum			outer membrane [GO:0019867]			outer membrane [GO:0019867]	25727014
A0A0D2N3Y6	A0A0D2N3Y6_9CHLO	unreviewed	Uncharacterized protein	MNEG_0897	Monoraphidium neglectum							25727015
A0A0D2K9U7	A0A0D2K9U7_9CHLO	unreviewed	Uncharacterized protein	MNEG_0898	Monoraphidium neglectum							25727016
A0A0D2LKY7	A0A0D2LKY7_9CHLO	unreviewed	Uncharacterized protein	MNEG_0899	Monoraphidium neglectum							25727017
A0A0D2MX07	A0A0D2MX07_9CHLO	unreviewed	Kinesin-like protein	MNEG_0900	Monoraphidium neglectum			microtubule [GO:0005874]; ATP binding [GO:0005524]; microtubule binding [GO:0008017]; microtubule motor activity [GO:0003777]; microtubule-based movement [GO:0007018]	microtubule-based movement [GO:0007018]	ATP binding [GO:0005524]; microtubule binding [GO:0008017]; microtubule motor activity [GO:0003777]	microtubule [GO:0005874]	25727018
A0A0D2NRZ0	A0A0D2NRZ0_9CHLO	unreviewed	Peptidase S8/S53 subtilisin kexin sedolisin (EC 3.4.21.111)	MNEG_0901	Monoraphidium neglectum			serine-type endopeptidase activity [GO:0004252]		serine-type endopeptidase activity [GO:0004252]		25727019
A0A0D2N3Z5	A0A0D2N3Z5_9CHLO	unreviewed	Phosphoribosyl-ATP pyrophosphohydrolase/ phosphoribosyl-AMP cyclohydrolase (EC 3.5.4.19)	MNEG_0902	Monoraphidium neglectum			phosphoribosyl-AMP cyclohydrolase activity [GO:0004635]; phosphoribosyl-ATP diphosphatase activity [GO:0004636]; histidine biosynthetic process [GO:0000105]	histidine biosynthetic process [GO:0000105]	phosphoribosyl-AMP cyclohydrolase activity [GO:0004635]; phosphoribosyl-ATP diphosphatase activity [GO:0004636]		25727020
A0A0D2K9V1	A0A0D2K9V1_9CHLO	unreviewed	Uncharacterized protein	MNEG_0903	Monoraphidium neglectum							25727021
A0A0D2LKZ4	A0A0D2LKZ4_9CHLO	unreviewed	Syntaxin	MNEG_0904	Monoraphidium neglectum			integral component of membrane [GO:0016021]; intracellular [GO:0005622]; SNAP receptor activity [GO:0005484]; intracellular protein transport [GO:0006886]; vesicle-mediated transport [GO:0016192]	intracellular protein transport [GO:0006886]; vesicle-mediated transport [GO:0016192]	SNAP receptor activity [GO:0005484]	integral component of membrane [GO:0016021]; intracellular [GO:0005622]	25727022
A0A0D2MX13	A0A0D2MX13_9CHLO	unreviewed	Uncharacterized protein	MNEG_0905	Monoraphidium neglectum			integral component of membrane [GO:0016021]; transport [GO:0006810]	transport [GO:0006810]		integral component of membrane [GO:0016021]	25727023
A0A0D2MWY5	A0A0D2MWY5_9CHLO	unreviewed	Fumarate hydratase, class II (EC 4.2.1.2)	MNEG_0906	Monoraphidium neglectum			tricarboxylic acid cycle enzyme complex [GO:0045239]; fumarate hydratase activity [GO:0004333]; fumarate metabolic process [GO:0006106]	fumarate metabolic process [GO:0006106]	fumarate hydratase activity [GO:0004333]	tricarboxylic acid cycle enzyme complex [GO:0045239]	25727024
A0A0D2NRX6	A0A0D2NRX6_9CHLO	unreviewed	Uncharacterized protein	MNEG_0907	Monoraphidium neglectum							25727025
A0A0D2N3W3	A0A0D2N3W3_9CHLO	unreviewed	Stearoyl-CoA desaturase (Delta-9desaturase) (EC 1.14.19.1)	MNEG_0908	Monoraphidium neglectum			integral component of membrane [GO:0016021]; stearoyl-CoA 9-desaturase activity [GO:0004768]; fatty acid biosynthetic process [GO:0006633]	fatty acid biosynthetic process [GO:0006633]	stearoyl-CoA 9-desaturase activity [GO:0004768]	integral component of membrane [GO:0016021]	25727026
A0A0D2K9U0	A0A0D2K9U0_9CHLO	unreviewed	Stearoyl-CoA desaturase (Delta-9desaturase) (EC 1.14.19.1)	MNEG_0909	Monoraphidium neglectum			integral component of membrane [GO:0016021]; stearoyl-CoA 9-desaturase activity [GO:0004768]; fatty acid biosynthetic process [GO:0006633]	fatty acid biosynthetic process [GO:0006633]	stearoyl-CoA 9-desaturase activity [GO:0004768]	integral component of membrane [GO:0016021]	25727027
A0A0D2LKX4	A0A0D2LKX4_9CHLO	unreviewed	Uncharacterized protein	MNEG_0910	Monoraphidium neglectum							25727028
A0A0D2MWZ2	A0A0D2MWZ2_9CHLO	unreviewed	Uncharacterized protein	MNEG_0911	Monoraphidium neglectum							25727029
A0A0D2NRY1	A0A0D2NRY1_9CHLO	unreviewed	Uncharacterized protein	MNEG_0912	Monoraphidium neglectum			zinc ion binding [GO:0008270]		zinc ion binding [GO:0008270]		25727030
A0A0D2N3X5	A0A0D2N3X5_9CHLO	unreviewed	Band 7 protein	MNEG_0913	Monoraphidium neglectum							25727031
A0A0D2K9U3	A0A0D2K9U3_9CHLO	unreviewed	Uncharacterized protein	MNEG_0914	Monoraphidium neglectum							25727032
A0A0D2LKY0	A0A0D2LKY0_9CHLO	unreviewed	Beta-Ig-H3/fasciclin	MNEG_0915	Monoraphidium neglectum							25727033
A0A0D2MX00	A0A0D2MX00_9CHLO	unreviewed	Uncharacterized protein	MNEG_0916	Monoraphidium neglectum			N-acetyltransferase activity [GO:0008080]		N-acetyltransferase activity [GO:0008080]		25727034
A0A0D2NRY6	A0A0D2NRY6_9CHLO	unreviewed	25.3 kDa vesicle transport protein	MNEG_0917	Monoraphidium neglectum			membrane [GO:0016020]; transport [GO:0006810]	transport [GO:0006810]		membrane [GO:0016020]	25727035
A0A0D2MWX3	A0A0D2MWX3_9CHLO	unreviewed	Beta-mannan synthase (EC 2.4.1.32) (Fragment)	MNEG_0918	Monoraphidium neglectum			glucomannan 4-beta-mannosyltransferase activity [GO:0047259]		glucomannan 4-beta-mannosyltransferase activity [GO:0047259]		25727036
A0A0D2NRW6	A0A0D2NRW6_9CHLO	unreviewed	Uncharacterized protein	MNEG_0919	Monoraphidium neglectum							25727037
A0A0D2N3U8	A0A0D2N3U8_9CHLO	unreviewed	Uncharacterized protein	MNEG_0920	Monoraphidium neglectum							25727038
A0A0D2K9T3	A0A0D2K9T3_9CHLO	unreviewed	Uncharacterized protein	MNEG_0921	Monoraphidium neglectum							25727039
A0A0D2LKW2	A0A0D2LKW2_9CHLO	unreviewed	MLO-like protein 12	MNEG_0922	Monoraphidium neglectum			integral component of membrane [GO:0016021]; defense response [GO:0006952]	defense response [GO:0006952]		integral component of membrane [GO:0016021]	25727040
A0A0D2MWX9	A0A0D2MWX9_9CHLO	unreviewed	Agmatine deiminase (EC 3.5.3.12)	MNEG_0923	Monoraphidium neglectum			agmatine deiminase activity [GO:0047632]; protein-arginine deiminase activity [GO:0004668]; putrescine biosynthetic process [GO:0009446]	putrescine biosynthetic process [GO:0009446]	agmatine deiminase activity [GO:0047632]; protein-arginine deiminase activity [GO:0004668]		25727041
A0A0D2NRX1	A0A0D2NRX1_9CHLO	unreviewed	Agmatine deiminase (EC 3.5.3.12)	MNEG_0924	Monoraphidium neglectum			agmatine deiminase activity [GO:0047632]; protein-arginine deiminase activity [GO:0004668]; putrescine biosynthetic process [GO:0009446]	putrescine biosynthetic process [GO:0009446]	agmatine deiminase activity [GO:0047632]; protein-arginine deiminase activity [GO:0004668]		25727042
A0A0D2N3V6	A0A0D2N3V6_9CHLO	unreviewed	Uncharacterized protein	MNEG_0925	Monoraphidium neglectum							25727043
A0A0D2K9T7	A0A0D2K9T7_9CHLO	unreviewed	Uncharacterized protein	MNEG_0926	Monoraphidium neglectum							25727044
A0A0D2LKW9	A0A0D2LKW9_9CHLO	unreviewed	Uncharacterized protein	MNEG_0927	Monoraphidium neglectum			integral component of membrane [GO:0016021]; transport [GO:0006810]	transport [GO:0006810]		integral component of membrane [GO:0016021]	25727045
A0A0D2N3S9	A0A0D2N3S9_9CHLO	unreviewed	Uncharacterized protein (Fragment)	MNEG_0928	Monoraphidium neglectum			integral component of membrane [GO:0016021]			integral component of membrane [GO:0016021]	25727046
A0A0D2K9S7	A0A0D2K9S7_9CHLO	unreviewed	Uncharacterized protein	MNEG_0929	Monoraphidium neglectum							25727047
A0A0D2LKV1	A0A0D2LKV1_9CHLO	unreviewed	tRNA guanosine-2'-O-methyltransferase TRM11 like protein (EC 2.1.1.-)	MNEG_0930	Monoraphidium neglectum			DNA binding [GO:0003677]; methyltransferase activity [GO:0008168]		DNA binding [GO:0003677]; methyltransferase activity [GO:0008168]		25727048
A0A0D2MWW8	A0A0D2MWW8_9CHLO	unreviewed	Uncharacterized protein	MNEG_0931	Monoraphidium neglectum							25727049
A0A0D2NRW0	A0A0D2NRW0_9CHLO	unreviewed	3-beta hydroxysteroid dehydrogenase/isomerase family protein (EC 1.1.1.145)	MNEG_0932	Monoraphidium neglectum			3-beta-hydroxy-delta5-steroid dehydrogenase activity [GO:0003854]; isomerase activity [GO:0016853]		3-beta-hydroxy-delta5-steroid dehydrogenase activity [GO:0003854]; isomerase activity [GO:0016853]		25727050
A0A0D2N3U0	A0A0D2N3U0_9CHLO	unreviewed	Uncharacterized protein	MNEG_0933	Monoraphidium neglectum							25727051
A0A0D2K9T1	A0A0D2K9T1_9CHLO	unreviewed	Brown fat uncoupling protein 1	MNEG_0934	Monoraphidium neglectum			integral component of membrane [GO:0016021]; transport [GO:0006810]	transport [GO:0006810]		integral component of membrane [GO:0016021]	25727052
A0A0D2LKV8	A0A0D2LKV8_9CHLO	unreviewed	Uncharacterized protein (Fragment)	MNEG_0935	Monoraphidium neglectum							25727053
A0A0D2LKT5	A0A0D2LKT5_9CHLO	unreviewed	Uncharacterized protein	MNEG_0936	Monoraphidium neglectum							25727054
A0A0D2MWU9	A0A0D2MWU9_9CHLO	unreviewed	Uncharacterized protein	MNEG_0937	Monoraphidium neglectum			ATP binding [GO:0005524]; protein kinase activity [GO:0004672]		ATP binding [GO:0005524]; protein kinase activity [GO:0004672]		25727055
A0A0D2NRU9	A0A0D2NRU9_9CHLO	unreviewed	Uncharacterized protein	MNEG_0938	Monoraphidium neglectum							25727056
A0A0D2N3S4	A0A0D2N3S4_9CHLO	unreviewed	Uncharacterized protein	MNEG_0939	Monoraphidium neglectum			integral component of membrane [GO:0016021]			integral component of membrane [GO:0016021]	25727057
A0A0D2K9S4	A0A0D2K9S4_9CHLO	unreviewed	DNA helicase II / ATP-dependent DNA helicase PcrA (EC 3.6.1.-)	MNEG_0940	Monoraphidium neglectum			ATP binding [GO:0005524]; ATP-dependent DNA helicase activity [GO:0004003]; DNA binding [GO:0003677]		ATP binding [GO:0005524]; ATP-dependent DNA helicase activity [GO:0004003]; DNA binding [GO:0003677]		25727058
A0A0D2LKU2	A0A0D2LKU2_9CHLO	unreviewed	Uncharacterized protein ycf36	MNEG_0941	Monoraphidium neglectum			integral component of membrane [GO:0016021]			integral component of membrane [GO:0016021]	25727059
A0A0D2MWW1	A0A0D2MWW1_9CHLO	unreviewed	Uncharacterized protein	MNEG_0942	Monoraphidium neglectum			microtubule organizing center [GO:0005815]; microtubule anchoring [GO:0034453]	microtubule anchoring [GO:0034453]		microtubule organizing center [GO:0005815]	25727060
A0A0D2NRV4	A0A0D2NRV4_9CHLO	unreviewed	Uncharacterized protein	MNEG_0943	Monoraphidium neglectum							25727061
A0A0D2LKS4	A0A0D2LKS4_9CHLO	unreviewed	Uncharacterized protein	MNEG_0944	Monoraphidium neglectum							25727062
A0A0D2MWT6	A0A0D2MWT6_9CHLO	unreviewed	Uncharacterized protein	MNEG_0945	Monoraphidium neglectum							25727063
A0A0D2NRT8	A0A0D2NRT8_9CHLO	unreviewed	Uncharacterized protein	MNEG_0946	Monoraphidium neglectum							25727064
A0A0D2N3R3	A0A0D2N3R3_9CHLO	unreviewed	Uncharacterized protein	MNEG_0947	Monoraphidium neglectum							25727065
A0A0D2K9R9	A0A0D2K9R9_9CHLO	unreviewed	Uncharacterized protein	MNEG_0948	Monoraphidium neglectum			transferase activity, transferring hexosyl groups [GO:0016758]; metabolic process [GO:0008152]	metabolic process [GO:0008152]	transferase activity, transferring hexosyl groups [GO:0016758]		25727066
A0A0D2LKS9	A0A0D2LKS9_9CHLO	unreviewed	Uncharacterized protein	MNEG_0949	Monoraphidium neglectum			integral component of membrane [GO:0016021]			integral component of membrane [GO:0016021]	25727067
A0A0D2MWU3	A0A0D2MWU3_9CHLO	unreviewed	Uncharacterized protein	MNEG_0950	Monoraphidium neglectum							25727068
A0A0D2NRU3	A0A0D2NRU3_9CHLO	unreviewed	Uncharacterized protein	MNEG_0951	Monoraphidium neglectum							25727069
A0A0D2N3R8	A0A0D2N3R8_9CHLO	unreviewed	Uncharacterized protein	MNEG_0952	Monoraphidium neglectum							25727070
A0A0D2K9S2	A0A0D2K9S2_9CHLO	unreviewed	Uncharacterized protein (Fragment)	MNEG_0953	Monoraphidium neglectum							25727071
A0A0D2NRS5	A0A0D2NRS5_9CHLO	unreviewed	Aldehyde dehydrogenase (NAD+) (EC 1.2.1.3)	MNEG_0954	Monoraphidium neglectum			aldehyde dehydrogenase (NAD) activity [GO:0004029]		aldehyde dehydrogenase (NAD) activity [GO:0004029]		25727072
A0A0D2N3P9	A0A0D2N3P9_9CHLO	unreviewed	Uncharacterized protein	MNEG_0955	Monoraphidium neglectum			oxidoreductase activity [GO:0016491]		oxidoreductase activity [GO:0016491]		25727073
A0A0D2K9R3	A0A0D2K9R3_9CHLO	unreviewed	Uncharacterized protein	MNEG_0956	Monoraphidium neglectum							25727074
A0A0D2LKR9	A0A0D2LKR9_9CHLO	unreviewed	Tetratricopeptide repeat protein 1	MNEG_0957	Monoraphidium neglectum							25727075
A0A0D2MWS7	A0A0D2MWS7_9CHLO	unreviewed	Uncharacterized protein	MNEG_0958	Monoraphidium neglectum							25727076
A0A0D2NRT1	A0A0D2NRT1_9CHLO	unreviewed	Uncharacterized protein	MNEG_0959	Monoraphidium neglectum			integral component of membrane [GO:0016021]			integral component of membrane [GO:0016021]	25727077
A0A0D2N3Q6	A0A0D2N3Q6_9CHLO	unreviewed	Uncharacterized protein	MNEG_0960	Monoraphidium neglectum			serine-type endopeptidase activity [GO:0004252]		serine-type endopeptidase activity [GO:0004252]		25727078
A0A0D2K9R4	A0A0D2K9R4_9CHLO	unreviewed	Uncharacterized protein	MNEG_0961	Monoraphidium neglectum			thiol-dependent ubiquitin-specific protease activity [GO:0004843]; protein deubiquitination [GO:0016579]; ubiquitin-dependent protein catabolic process [GO:0006511]	protein deubiquitination [GO:0016579]; ubiquitin-dependent protein catabolic process [GO:0006511]	thiol-dependent ubiquitin-specific protease activity [GO:0004843]		25727079
A0A0D2K9Q6	A0A0D2K9Q6_9CHLO	unreviewed	Arginine biosynthesis bifunctional protein ArgJ, chloroplastic [Cleaved into: Arginine biosynthesis bifunctional protein ArgJ beta chain; Arginine biosynthesis bifunctional protein ArgJ alpha chain] [Includes: Amino-acid acetyltransferase (EC 2.3.1.1) (N-acetylglutamate synthase) (AGS); Glutamate N-acetyltransferase (GAT) (EC 2.3.1.35) (Ornithine transacetylase) (Ornithine acetyltransferase) (OAT…	MNEG_0962	Monoraphidium neglectum	PATHWAY: Amino-acid biosynthesis; L-arginine biosynthesis; L-ornithine and N-acetyl-L-glutamate from L-glutamate and N(2)-acetyl-L-ornithine (cyclic): step 1/1. {ECO:0000256|HAMAP-Rule:MF_03124}.; PATHWAY: Amino-acid biosynthesis; L-arginine biosynthesis; N(2)-acetyl-L-ornithine from L-glutamate: step 1/4. {ECO:0000256|HAMAP-Rule:MF_03124}.	CATALYTIC ACTIVITY: Acetyl-CoA + L-glutamate = CoA + N-acetyl-L-glutamate. {ECO:0000256|HAMAP-Rule:MF_03124}.; CATALYTIC ACTIVITY: N(2)-acetyl-L-ornithine + L-glutamate = L-ornithine + N-acetyl-L-glutamate. {ECO:0000256|HAMAP-Rule:MF_03124}.	chloroplast [GO:0009507]; acetyl-CoA:L-glutamate N-acetyltransferase activity [GO:0004042]; glutamate N-acetyltransferase activity [GO:0004358]; arginine biosynthetic process [GO:0006526]	arginine biosynthetic process [GO:0006526]	acetyl-CoA:L-glutamate N-acetyltransferase activity [GO:0004042]; glutamate N-acetyltransferase activity [GO:0004358]	chloroplast [GO:0009507]	25727080
A0A0D2LKQ7	A0A0D2LKQ7_9CHLO	unreviewed	Putative 26S proteasome non-ATPase regulatory subunit 7	MNEG_0963	Monoraphidium neglectum			proteasome regulatory particle [GO:0005838]			proteasome regulatory particle [GO:0005838]	25727081
A0A0D2MWR2	A0A0D2MWR2_9CHLO	unreviewed	Uncharacterized protein	MNEG_0964	Monoraphidium neglectum							25727082
A0A0D2NRS0	A0A0D2NRS0_9CHLO	unreviewed	RNA 3'-terminal phosphate cyclase (EC 6.5.1.4)	MNEG_0965	Monoraphidium neglectum			RNA-3'-phosphate cyclase activity [GO:0003963]; RNA processing [GO:0006396]	RNA processing [GO:0006396]	RNA-3'-phosphate cyclase activity [GO:0003963]		25727083
A0A0D2N3P3	A0A0D2N3P3_9CHLO	unreviewed	Uncharacterized protein	MNEG_0966	Monoraphidium neglectum							25727084
A0A0D2K9Q8	A0A0D2K9Q8_9CHLO	unreviewed	Uncharacterized protein	MNEG_0967	Monoraphidium neglectum			ATP binding [GO:0005524]; protein dimerization activity [GO:0046983]; protein kinase activity [GO:0004672]		ATP binding [GO:0005524]; protein dimerization activity [GO:0046983]; protein kinase activity [GO:0004672]		25727085
A0A0D2LKR4	A0A0D2LKR4_9CHLO	unreviewed	Uncharacterized protein	MNEG_0968	Monoraphidium neglectum							25727086
A0A0D2MWS1	A0A0D2MWS1_9CHLO	unreviewed	Glutathione S-transferase DHAR1	MNEG_0969	Monoraphidium neglectum			transferase activity [GO:0016740]		transferase activity [GO:0016740]		25727087
A0A0D2NRQ5	A0A0D2NRQ5_9CHLO	unreviewed	Putative UDP-N-acetylglucosamine--peptideN-acetylglucosaminyltransferase SPINDLY (EC 2.4.1.-)	MNEG_0970	Monoraphidium neglectum			ATP binding [GO:0005524]; mismatched DNA binding [GO:0030983]; transferase activity, transferring glycosyl groups [GO:0016757]; mismatch repair [GO:0006298]	mismatch repair [GO:0006298]	ATP binding [GO:0005524]; mismatched DNA binding [GO:0030983]; transferase activity, transferring glycosyl groups [GO:0016757]		25727088
A0A0D2N3M8	A0A0D2N3M8_9CHLO	unreviewed	Uncharacterized protein	MNEG_0971	Monoraphidium neglectum			ATP binding [GO:0005524]; protein kinase activity [GO:0004672]		ATP binding [GO:0005524]; protein kinase activity [GO:0004672]		25727089
A0A0D2K9Q2	A0A0D2K9Q2_9CHLO	unreviewed	Uncharacterized protein	MNEG_0972	Monoraphidium neglectum							25727090
A0A0D2LKQ2	A0A0D2LKQ2_9CHLO	unreviewed	Uncharacterized protein	MNEG_0973	Monoraphidium neglectum							25727091
A0A0D2MWQ6	A0A0D2MWQ6_9CHLO	unreviewed	S-(hydroxymethyl)glutathione dehydrogenase (EC 1.1.1.284)	MNEG_0974	Monoraphidium neglectum		CATALYTIC ACTIVITY: S-(hydroxymethyl)glutathione + NAD(P)(+) = S-formylglutathione + NAD(P)H. {ECO:0000256|RuleBase:RU362016}.	S-(hydroxymethyl)glutathione dehydrogenase activity [GO:0051903]; zinc ion binding [GO:0008270]; ethanol oxidation [GO:0006069]	ethanol oxidation [GO:0006069]	S-(hydroxymethyl)glutathione dehydrogenase activity [GO:0051903]; zinc ion binding [GO:0008270]		25727092
A0A0D2NRR1	A0A0D2NRR1_9CHLO	unreviewed	Thylakoid lumenal protein 1	MNEG_0975	Monoraphidium neglectum							25727093
A0A0D2N3N5	A0A0D2N3N5_9CHLO	unreviewed	Uncharacterized protein	MNEG_0976	Monoraphidium neglectum			extracellular region [GO:0005576]; cellulose binding [GO:0030248]; hydrolase activity, hydrolyzing O-glycosyl compounds [GO:0004553]; carbohydrate metabolic process [GO:0005975]	carbohydrate metabolic process [GO:0005975]	cellulose binding [GO:0030248]; hydrolase activity, hydrolyzing O-glycosyl compounds [GO:0004553]	extracellular region [GO:0005576]	25727094
A0A0D2N3L7	A0A0D2N3L7_9CHLO	unreviewed	Uncharacterized protein (Fragment)	MNEG_0977	Monoraphidium neglectum							25727095
A0A0D2K9P0	A0A0D2K9P0_9CHLO	unreviewed	3-ketoacyl-CoA synthase (EC 2.3.1.-)	MNEG_0978	Monoraphidium neglectum	PATHWAY: Lipid metabolism; fatty acid biosynthesis. {ECO:0000256|PIRNR:PIRNR036417}.		membrane [GO:0016020]; transferase activity, transferring acyl groups other than amino-acyl groups [GO:0016747]; fatty acid biosynthetic process [GO:0006633]	fatty acid biosynthetic process [GO:0006633]	transferase activity, transferring acyl groups other than amino-acyl groups [GO:0016747]	membrane [GO:0016020]	25727096
A0A0D2LKP3	A0A0D2LKP3_9CHLO	unreviewed	Uncharacterized protein	MNEG_0979	Monoraphidium neglectum							25727097
A0A0D2MWP4	A0A0D2MWP4_9CHLO	unreviewed	Uncharacterized protein	MNEG_0980	Monoraphidium neglectum							25727098
A0A0D2NRP9	A0A0D2NRP9_9CHLO	unreviewed	Uncharacterized protein	MNEG_0981	Monoraphidium neglectum			integral component of membrane [GO:0016021]			integral component of membrane [GO:0016021]	25727099
A0A0D2N3M3	A0A0D2N3M3_9CHLO	unreviewed	Heme peroxidase-related protein (EC 1.1.1.219)	MNEG_0982	Monoraphidium neglectum			coenzyme binding [GO:0050662]; dihydrokaempferol 4-reductase activity [GO:0045552]; peroxidase activity [GO:0004601]		coenzyme binding [GO:0050662]; dihydrokaempferol 4-reductase activity [GO:0045552]; peroxidase activity [GO:0004601]		25727100
A0A0D2K9P7	A0A0D2K9P7_9CHLO	unreviewed	40S ribosomal protein S20-1	MNEG_0983	Monoraphidium neglectum			small ribosomal subunit [GO:0015935]; structural constituent of ribosome [GO:0003735]; translation [GO:0006412]	translation [GO:0006412]	structural constituent of ribosome [GO:0003735]	small ribosomal subunit [GO:0015935]	25727101
A0A0D2LKP7	A0A0D2LKP7_9CHLO	unreviewed	Uncharacterized protein	MNEG_0984	Monoraphidium neglectum							25727102
A0A0D2MWQ0	A0A0D2MWQ0_9CHLO	unreviewed	Uncharacterized protein	MNEG_0985	Monoraphidium neglectum							25727103
A0A0D2N3K6	A0A0D2N3K6_9CHLO	unreviewed	Uncharacterized protein	MNEG_0986	Monoraphidium neglectum			heme binding [GO:0020037]; iron ion binding [GO:0005506]; oxidoreductase activity, acting on paired donors, with incorporation or reduction of molecular oxygen [GO:0016705]		heme binding [GO:0020037]; iron ion binding [GO:0005506]; oxidoreductase activity, acting on paired donors, with incorporation or reduction of molecular oxygen [GO:0016705]		25727104
A0A0D2K9M9	A0A0D2K9M9_9CHLO	unreviewed	Uncharacterized protein	MNEG_0987	Monoraphidium neglectum			heme binding [GO:0020037]; iron ion binding [GO:0005506]; monooxygenase activity [GO:0004497]; oxidoreductase activity, acting on paired donors, with incorporation or reduction of molecular oxygen [GO:0016705]		heme binding [GO:0020037]; iron ion binding [GO:0005506]; monooxygenase activity [GO:0004497]; oxidoreductase activity, acting on paired donors, with incorporation or reduction of molecular oxygen [GO:0016705]		25727105
A0A0D2LKM9	A0A0D2LKM9_9CHLO	unreviewed	Uncharacterized protein	MNEG_0988	Monoraphidium neglectum			deoxyribonuclease II activity [GO:0004531]		deoxyribonuclease II activity [GO:0004531]		25727106
A0A0D2MWN5	A0A0D2MWN5_9CHLO	unreviewed	Uncharacterized protein	MNEG_0989	Monoraphidium neglectum							25727107
A0A0D2NRN8	A0A0D2NRN8_9CHLO	unreviewed	Uncharacterized protein	MNEG_0990	Monoraphidium neglectum							25727108
A0A0D2N3L2	A0A0D2N3L2_9CHLO	unreviewed	Uncharacterized protein	MNEG_0991	Monoraphidium neglectum							25727109
A0A0D2K9N4	A0A0D2K9N4_9CHLO	unreviewed	Uncharacterized protein	MNEG_0992	Monoraphidium neglectum			integral component of membrane [GO:0016021]			integral component of membrane [GO:0016021]	25727110
A0A0D2LKN7	A0A0D2LKN7_9CHLO	unreviewed	Uncharacterized protein	MNEG_0993	Monoraphidium neglectum							25727111
A0A0D2MWP0	A0A0D2MWP0_9CHLO	unreviewed	40S ribosomal protein S25-3	MNEG_0994	Monoraphidium neglectum			ribosome [GO:0005840]			ribosome [GO:0005840]	25727112
A0A0D2NRP4	A0A0D2NRP4_9CHLO	unreviewed	Uncharacterized protein	MNEG_0995	Monoraphidium neglectum							25727113
A0A0D2MWL8	A0A0D2MWL8_9CHLO	unreviewed	Uncharacterized protein	MNEG_0996	Monoraphidium neglectum			integral component of membrane [GO:0016021]			integral component of membrane [GO:0016021]	25727114
A0A0D2NRM1	A0A0D2NRM1_9CHLO	unreviewed	Uncharacterized protein	MNEG_0997	Monoraphidium neglectum							25727115
A0A0D2N3J5	A0A0D2N3J5_9CHLO	unreviewed	Uncharacterized protein	MNEG_0998	Monoraphidium neglectum							25727116
A0A0D2K9M0	A0A0D2K9M0_9CHLO	unreviewed	Uncharacterized protein	MNEG_0999	Monoraphidium neglectum			protein tyrosine phosphatase activity [GO:0004725]; protein tyrosine/serine/threonine phosphatase activity [GO:0008138]		protein tyrosine/serine/threonine phosphatase activity [GO:0008138]; protein tyrosine phosphatase activity [GO:0004725]		25727117
A0A0D2LKL9	A0A0D2LKL9_9CHLO	unreviewed	Coiled-coil domain-containing protein 77	MNEG_1000	Monoraphidium neglectum							25727118
A0A0D2MWM3	A0A0D2MWM3_9CHLO	unreviewed	Uncharacterized protein	MNEG_1001	Monoraphidium neglectum							25727129
A0A0D2NRM8	A0A0D2NRM8_9CHLO	unreviewed	Cyclin-A1-1	MNEG_1002	Monoraphidium neglectum			nucleus [GO:0005634]			nucleus [GO:0005634]	25727140
A0A0D2N3K0	A0A0D2N3K0_9CHLO	unreviewed	Uncharacterized protein	MNEG_1003	Monoraphidium neglectum							25727151
A0A0D2K9M4	A0A0D2K9M4_9CHLO	unreviewed	Uncharacterized protein	MNEG_1004	Monoraphidium neglectum							25727162
A0A0D2LKM5	A0A0D2LKM5_9CHLO	unreviewed	Uncharacterized protein	MNEG_1005	Monoraphidium neglectum							25727173
A0A0D2MWM9	A0A0D2MWM9_9CHLO	unreviewed	Uncharacterized protein	MNEG_1006	Monoraphidium neglectum							25727184
A0A0D2NRN5	A0A0D2NRN5_9CHLO	unreviewed	Kinesin-2	MNEG_1007	Monoraphidium neglectum			ATP binding [GO:0005524]; microtubule binding [GO:0008017]; microtubule motor activity [GO:0003777]; microtubule-based movement [GO:0007018]	microtubule-based movement [GO:0007018]	ATP binding [GO:0005524]; microtubule binding [GO:0008017]; microtubule motor activity [GO:0003777]		25727195
A0A0D2MWK7	A0A0D2MWK7_9CHLO	unreviewed	RNA-binding protein C3, CELF family	MNEG_1008	Monoraphidium neglectum			RNA binding [GO:0003723]		RNA binding [GO:0003723]		25727206
A0A0D2NRK8	A0A0D2NRK8_9CHLO	unreviewed	Uncharacterized protein	MNEG_1009	Monoraphidium neglectum							25727217
A0A0D2N3I5	A0A0D2N3I5_9CHLO	unreviewed	Cyanate lyase (EC 4.2.1.104)	MNEG_1010	Monoraphidium neglectum			cyanate hydratase activity [GO:0008824]; DNA binding [GO:0003677]; cyanate metabolic process [GO:0009439]	cyanate metabolic process [GO:0009439]	cyanate hydratase activity [GO:0008824]; DNA binding [GO:0003677]		25727228
A0A0D2K9L0	A0A0D2K9L0_9CHLO	unreviewed	Inner membrane protein	MNEG_1011	Monoraphidium neglectum			integral component of membrane [GO:0016021]			integral component of membrane [GO:0016021]	25727239
A0A0D2LKK6	A0A0D2LKK6_9CHLO	unreviewed	Uncharacterized protein	MNEG_1012	Monoraphidium neglectum			integral component of membrane [GO:0016021]			integral component of membrane [GO:0016021]	25727250
A0A0D2MWL3	A0A0D2MWL3_9CHLO	unreviewed	Uncharacterized protein	MNEG_1013	Monoraphidium neglectum							25727261
A0A0D2NRL4	A0A0D2NRL4_9CHLO	unreviewed	Tryptophan-rich sensory protein	MNEG_1014	Monoraphidium neglectum			integral component of membrane [GO:0016021]			integral component of membrane [GO:0016021]	25727272
A0A0D2N3J1	A0A0D2N3J1_9CHLO	unreviewed	Putative RNA-binding protein	MNEG_1015	Monoraphidium neglectum			RNA binding [GO:0003723]		RNA binding [GO:0003723]		25727283
A0A0D2K9L5	A0A0D2K9L5_9CHLO	unreviewed	Uncharacterized protein	MNEG_1016	Monoraphidium neglectum							25727294
A0A0D2LKL1	A0A0D2LKL1_9CHLO	unreviewed	Glucose-6-phosphate isomerase (EC 5.3.1.9)	MNEG_1017	Monoraphidium neglectum	PATHWAY: Carbohydrate degradation; glycolysis; D-glyceraldehyde 3-phosphate and glycerone phosphate from D-glucose: step 2/4. {ECO:0000256|RuleBase:RU000612}.	CATALYTIC ACTIVITY: D-glucose 6-phosphate = D-fructose 6-phosphate. {ECO:0000256|RuleBase:RU000612}.	glucose-6-phosphate isomerase activity [GO:0004347]; gluconeogenesis [GO:0006094]; glycolytic process [GO:0006096]	gluconeogenesis [GO:0006094]; glycolytic process [GO:0006096]	glucose-6-phosphate isomerase activity [GO:0004347]		25727305
A0A0D2NRJ6	A0A0D2NRJ6_9CHLO	unreviewed	FLU chloroplast, alternative spliced version l-FLP	MNEG_1018	Monoraphidium neglectum							25727316
A0A0D2N3G9	A0A0D2N3G9_9CHLO	unreviewed	40S ribosomal protein S28	MNEG_1019	Monoraphidium neglectum			ribosome [GO:0005840]; structural constituent of ribosome [GO:0003735]; translation [GO:0006412]	translation [GO:0006412]	structural constituent of ribosome [GO:0003735]	ribosome [GO:0005840]	25727327
A0A0D2K9J9	A0A0D2K9J9_9CHLO	unreviewed	Uncharacterized protein	MNEG_1020	Monoraphidium neglectum							25727338
A0A0D2LKJ4	A0A0D2LKJ4_9CHLO	unreviewed	Uncharacterized protein	MNEG_1021	Monoraphidium neglectum							25727349
A0A0D2MWJ9	A0A0D2MWJ9_9CHLO	unreviewed	Glutathione reductase (EC 1.8.1.7)	MNEG_1022	Monoraphidium neglectum			cell [GO:0005623]; flavin adenine dinucleotide binding [GO:0050660]; glutathione-disulfide reductase activity [GO:0004362]; cell redox homeostasis [GO:0045454]	cell redox homeostasis [GO:0045454]	flavin adenine dinucleotide binding [GO:0050660]; glutathione-disulfide reductase activity [GO:0004362]	cell [GO:0005623]	25727360
A0A0D2NRK4	A0A0D2NRK4_9CHLO	unreviewed	Glutathione reductase (NADPH) (EC 1.8.1.7)	MNEG_1023	Monoraphidium neglectum			glutathione-disulfide reductase activity [GO:0004362]		glutathione-disulfide reductase activity [GO:0004362]		25727371
A0A0D2N3H7	A0A0D2N3H7_9CHLO	unreviewed	Uncharacterized protein	MNEG_1024	Monoraphidium neglectum			NAD binding [GO:0051287]; oxidation-reduction process [GO:0055114]	oxidation-reduction process [GO:0055114]	NAD binding [GO:0051287]		25727382
A0A0D2K9K5	A0A0D2K9K5_9CHLO	unreviewed	Uncharacterized protein	MNEG_1025	Monoraphidium neglectum							25727393
A0A0D2LKK1	A0A0D2LKK1_9CHLO	unreviewed	Uncharacterized protein	MNEG_1026	Monoraphidium neglectum							25727404
A0A0D2K9J2	A0A0D2K9J2_9CHLO	unreviewed	Uncharacterized protein	MNEG_1027	Monoraphidium neglectum			integral component of membrane [GO:0016021]; nucleic acid binding [GO:0003676]		nucleic acid binding [GO:0003676]	integral component of membrane [GO:0016021]	25727415
A0A0D2LKI2	A0A0D2LKI2_9CHLO	unreviewed	Uncharacterized protein	MNEG_1028	Monoraphidium neglectum							25727426
A0A0D2MWI7	A0A0D2MWI7_9CHLO	unreviewed	Uncharacterized protein	MNEG_1029	Monoraphidium neglectum			integral component of membrane [GO:0016021]			integral component of membrane [GO:0016021]	25727437
A0A0D2NRJ0	A0A0D2NRJ0_9CHLO	unreviewed	Uncharacterized protein	MNEG_1030	Monoraphidium neglectum							25727448
A0A0D2N3G3	A0A0D2N3G3_9CHLO	unreviewed	Uncharacterized protein	MNEG_1031	Monoraphidium neglectum			integral component of membrane [GO:0016021]; photosystem II [GO:0009523]; photosynthesis [GO:0015979]	photosynthesis [GO:0015979]		integral component of membrane [GO:0016021]; photosystem II [GO:0009523]	25727459
A0A0D2K9J6	A0A0D2K9J6_9CHLO	unreviewed	COP9 signalosome complex subunit 5 (EC 3.4.-.-)	MNEG_1032	Monoraphidium neglectum			hydrolase activity [GO:0016787]		hydrolase activity [GO:0016787]		25727470
A0A0D2LKI9	A0A0D2LKI9_9CHLO	unreviewed	Uncharacterized protein	MNEG_1033	Monoraphidium neglectum							25727481
A0A0D2MWJ3	A0A0D2MWJ3_9CHLO	unreviewed	Vacuolar cation/proton exchanger 3	MNEG_1034	Monoraphidium neglectum			integral component of membrane [GO:0016021]; calcium:proton antiporter activity [GO:0015369]; potassium:proton antiporter activity [GO:0015386]		calcium:proton antiporter activity [GO:0015369]; potassium:proton antiporter activity [GO:0015386]	integral component of membrane [GO:0016021]	25727492
A0A0D2LKH1	A0A0D2LKH1_9CHLO	unreviewed	Uncharacterized protein	MNEG_1035	Monoraphidium neglectum							25727503
A0A0D2MWG5	A0A0D2MWG5_9CHLO	unreviewed	Uncharacterized protein	MNEG_1036	Monoraphidium neglectum			catalytic activity [GO:0003824]		catalytic activity [GO:0003824]		25727514
A0A0D2NRH8	A0A0D2NRH8_9CHLO	unreviewed	Uncharacterized protein	MNEG_1037	Monoraphidium neglectum							25727525
A0A0D2N3F0	A0A0D2N3F0_9CHLO	unreviewed	Uncharacterized protein	MNEG_1038	Monoraphidium neglectum			integral component of membrane [GO:0016021]; hydrolase activity, hydrolyzing O-glycosyl compounds [GO:0004553]; carbohydrate metabolic process [GO:0005975]	carbohydrate metabolic process [GO:0005975]	hydrolase activity, hydrolyzing O-glycosyl compounds [GO:0004553]	integral component of membrane [GO:0016021]	25727536
A0A0D2K9I9	A0A0D2K9I9_9CHLO	unreviewed	Cellulose synthase/ transferase, transferring glycosyl group (EC 2.4.1.32)	MNEG_1039	Monoraphidium neglectum			integral component of membrane [GO:0016021]; glucomannan 4-beta-mannosyltransferase activity [GO:0047259]		glucomannan 4-beta-mannosyltransferase activity [GO:0047259]	integral component of membrane [GO:0016021]	25727547
A0A0D2LKH6	A0A0D2LKH6_9CHLO	unreviewed	Uncharacterized protein	MNEG_1040	Monoraphidium neglectum			metal ion binding [GO:0046872]; oxidoreductase activity [GO:0016491]		metal ion binding [GO:0046872]; oxidoreductase activity [GO:0016491]		25727558
A0A0D2MWH5	A0A0D2MWH5_9CHLO	unreviewed	Cytochrome P450 (EC 1.14.-.-)	MNEG_1041	Monoraphidium neglectum			heme binding [GO:0020037]; iron ion binding [GO:0005506]; monooxygenase activity [GO:0004497]; oxidoreductase activity, acting on paired donors, with incorporation or reduction of molecular oxygen [GO:0016705]		heme binding [GO:0020037]; iron ion binding [GO:0005506]; monooxygenase activity [GO:0004497]; oxidoreductase activity, acting on paired donors, with incorporation or reduction of molecular oxygen [GO:0016705]		25727569
A0A0D2NRI4	A0A0D2NRI4_9CHLO	unreviewed	Cytochrome P450 (EC 1.14.14.1)	MNEG_1042	Monoraphidium neglectum			integral component of membrane [GO:0016021]; aromatase activity [GO:0070330]; heme binding [GO:0020037]; iron ion binding [GO:0005506]		aromatase activity [GO:0070330]; heme binding [GO:0020037]; iron ion binding [GO:0005506]	integral component of membrane [GO:0016021]	25727580
A0A0D2N3F7	A0A0D2N3F7_9CHLO	unreviewed	Alpha-tubulin N-acetyltransferase (Alpha-TAT) (TAT) (EC 2.3.1.108) (Acetyltransferase mec-17 homolog)	MNEG_1043	Monoraphidium neglectum		CATALYTIC ACTIVITY: Acetyl-CoA + [alpha-tubulin]-L-lysine = CoA + [alpha-tubulin]-N(6)-acetyl-L-lysine. {ECO:0000256|HAMAP-Rule:MF_03130}.	microtubule [GO:0005874]; tubulin N-acetyltransferase activity [GO:0019799]; alpha-tubulin acetylation [GO:0071929]; regulation of microtubule cytoskeleton organization [GO:0070507]	alpha-tubulin acetylation [GO:0071929]; regulation of microtubule cytoskeleton organization [GO:0070507]	tubulin N-acetyltransferase activity [GO:0019799]	microtubule [GO:0005874]	25727591
A0A0D2K9I1	A0A0D2K9I1_9CHLO	unreviewed	Uncharacterized protein	MNEG_1044	Monoraphidium neglectum							25727602
A0A0D2LKG5	A0A0D2LKG5_9CHLO	unreviewed	Uncharacterized protein	MNEG_1045	Monoraphidium neglectum			kinase activity [GO:0016301]		kinase activity [GO:0016301]		25727613
A0A0D2MWF8	A0A0D2MWF8_9CHLO	unreviewed	Ran-binding protein 1 domain-containing protein/ RanBP1 domain-containing protein	MNEG_1046	Monoraphidium neglectum			nuclear pore [GO:0005643]; intracellular transport [GO:0046907]	intracellular transport [GO:0046907]		nuclear pore [GO:0005643]	25727624
A0A0D2NRH3	A0A0D2NRH3_9CHLO	unreviewed	Uncharacterized protein	MNEG_1047	Monoraphidium neglectum			integral component of membrane [GO:0016021]; regulation of transcription, DNA-templated [GO:0006355]	regulation of transcription, DNA-templated [GO:0006355]		integral component of membrane [GO:0016021]	25727635
A0A0D2N3E4	A0A0D2N3E4_9CHLO	unreviewed	Ubiquilin-1	MNEG_1048	Monoraphidium neglectum							25727646
A0A0D2K9I5	A0A0D2K9I5_9CHLO	unreviewed	Putative ribosomal RNA methyltransferase NOP2 (EC 2.1.1.-)	MNEG_1049	Monoraphidium neglectum			RNA binding [GO:0003723]; S-adenosylmethionine-dependent methyltransferase activity [GO:0008757]; rRNA processing [GO:0006364]	rRNA processing [GO:0006364]	RNA binding [GO:0003723]; S-adenosylmethionine-dependent methyltransferase activity [GO:0008757]		25727657
A0A0D2MWE4	A0A0D2MWE4_9CHLO	unreviewed	Uncharacterized protein	MNEG_1050	Monoraphidium neglectum							25727668
A0A0D2NRG1	A0A0D2NRG1_9CHLO	unreviewed	Uncharacterized protein	MNEG_1051	Monoraphidium neglectum			GTP binding [GO:0005525]		GTP binding [GO:0005525]		25727679
A0A0D2N3D1	A0A0D2N3D1_9CHLO	unreviewed	Uncharacterized protein	MNEG_1052	Monoraphidium neglectum							25727690
A0A0D2K9H7	A0A0D2K9H7_9CHLO	unreviewed	Uncharacterized protein	MNEG_1053	Monoraphidium neglectum							25727701
A0A0D2LKG3	A0A0D2LKG3_9CHLO	unreviewed	Melanotransferrin	MNEG_1054	Monoraphidium neglectum			integral component of membrane [GO:0016021]			integral component of membrane [GO:0016021]	25727712
A0A0D2MWE9	A0A0D2MWE9_9CHLO	unreviewed	Uncharacterized protein	MNEG_1055	Monoraphidium neglectum							25727723
A0A0D2NRG6	A0A0D2NRG6_9CHLO	unreviewed	Uncharacterized protein	MNEG_1056	Monoraphidium neglectum			integral component of membrane [GO:0016021]			integral component of membrane [GO:0016021]	25727734
A0A0D2N3D7	A0A0D2N3D7_9CHLO	unreviewed	Uncharacterized protein (Fragment)	MNEG_1057	Monoraphidium neglectum			integral component of membrane [GO:0016021]			integral component of membrane [GO:0016021]	25727745
A0A0D2MWD7	A0A0D2MWD7_9CHLO	unreviewed	Eukaryotic translation initiation factor 3 subunit D-2 (Fragment)	MNEG_1058	Monoraphidium neglectum			eukaryotic translation initiation factor 3 complex [GO:0005852]; translation initiation factor activity [GO:0003743]		translation initiation factor activity [GO:0003743]	eukaryotic translation initiation factor 3 complex [GO:0005852]	25727756
A0A0D2NRF0	A0A0D2NRF0_9CHLO	unreviewed	Maf-like protein	MNEG_1059	Monoraphidium neglectum			nucleoside-triphosphate diphosphatase activity [GO:0047429]		nucleoside-triphosphate diphosphatase activity [GO:0047429]		25727767
A0A0D2N3B8	A0A0D2N3B8_9CHLO	unreviewed	Flagellar radial spoke protein 6	MNEG_1060	Monoraphidium neglectum			motile cilium [GO:0031514]			motile cilium [GO:0031514]	25727778
A0A0D2K9H0	A0A0D2K9H0_9CHLO	unreviewed	Uncharacterized protein	MNEG_1061	Monoraphidium neglectum							25727789
A0A0D2LKF6	A0A0D2LKF6_9CHLO	unreviewed	Uncharacterized protein	MNEG_1062	Monoraphidium neglectum			sequence-specific DNA binding [GO:0043565]; transcription factor activity, sequence-specific DNA binding [GO:0003700]; zinc ion binding [GO:0008270]		sequence-specific DNA binding [GO:0043565]; transcription factor activity, sequence-specific DNA binding [GO:0003700]; zinc ion binding [GO:0008270]		25727800
A0A0D2MWE0	A0A0D2MWE0_9CHLO	unreviewed	Uncharacterized protein	MNEG_1063	Monoraphidium neglectum			amidase activity [GO:0004040]		amidase activity [GO:0004040]		25727811
A0A0D2NRF6	A0A0D2NRF6_9CHLO	unreviewed	Uncharacterized protein	MNEG_1064	Monoraphidium neglectum			amidase activity [GO:0004040]		amidase activity [GO:0004040]		25727822
A0A0D2N3C2	A0A0D2N3C2_9CHLO	unreviewed	Uncharacterized protein	MNEG_1065	Monoraphidium neglectum							25727833
A0A0D2K9H3	A0A0D2K9H3_9CHLO	unreviewed	Uncharacterized protein	MNEG_1066	Monoraphidium neglectum							25727844
A0A0D2LKG0	A0A0D2LKG0_9CHLO	unreviewed	Uncharacterized protein	MNEG_1067	Monoraphidium neglectum			integral component of membrane [GO:0016021]			integral component of membrane [GO:0016021]	25727855
A0A0D2NRE2	A0A0D2NRE2_9CHLO	unreviewed	Uncharacterized protein	MNEG_1068	Monoraphidium neglectum							25727866
A0A0D2N3B1	A0A0D2N3B1_9CHLO	unreviewed	Uncharacterized protein	MNEG_1069	Monoraphidium neglectum							25727877
A0A0D2K9G2	A0A0D2K9G2_9CHLO	unreviewed	Uncharacterized protein	MNEG_1070	Monoraphidium neglectum							25727888
A0A0D2LKE9	A0A0D2LKE9_9CHLO	unreviewed	Uncharacterized protein	MNEG_1071	Monoraphidium neglectum							25727899
A0A0D2MWD2	A0A0D2MWD2_9CHLO	unreviewed	Cystathionine gamma-synthase (EC 2.5.1.48)	MNEG_1072	Monoraphidium neglectum			nucleus [GO:0005634]; ATP binding [GO:0005524]; cystathionine gamma-synthase activity [GO:0003962]; helicase activity [GO:0004386]; pyridoxal phosphate binding [GO:0030170]; RNA binding [GO:0003723]		ATP binding [GO:0005524]; cystathionine gamma-synthase activity [GO:0003962]; helicase activity [GO:0004386]; pyridoxal phosphate binding [GO:0030170]; RNA binding [GO:0003723]	nucleus [GO:0005634]	25727910
A0A0D2NRE6	A0A0D2NRE6_9CHLO	unreviewed	Uncharacterized protein	MNEG_1073	Monoraphidium neglectum			integral component of membrane [GO:0016021]			integral component of membrane [GO:0016021]	25727921
A0A0D2N3B4	A0A0D2N3B4_9CHLO	unreviewed	Putative aarF domain-containing protein kinase (EC 2.7.-.-)	MNEG_1074	Monoraphidium neglectum			ATP binding [GO:0005524]; protein kinase activity [GO:0004672]		ATP binding [GO:0005524]; protein kinase activity [GO:0004672]		25727932
A0A0D2K9G7	A0A0D2K9G7_9CHLO	unreviewed	Putative aarF domain-containing protein kinase	MNEG_1075	Monoraphidium neglectum			kinase activity [GO:0016301]		kinase activity [GO:0016301]		25727943
A0A0D2LKF2	A0A0D2LKF2_9CHLO	unreviewed	Uncharacterized protein (Fragment)	MNEG_1076	Monoraphidium neglectum							25727954
A0A0D2NRD1	A0A0D2NRD1_9CHLO	unreviewed	Uncharacterized protein	MNEG_1077	Monoraphidium neglectum			mediator complex [GO:0016592]; RNA polymerase II transcription cofactor activity [GO:0001104]		RNA polymerase II transcription cofactor activity [GO:0001104]	mediator complex [GO:0016592]	25727965
A0A0D2N3A0	A0A0D2N3A0_9CHLO	unreviewed	Uncharacterized protein	MNEG_1078	Monoraphidium neglectum							25727976
A0A0D2K9F5	A0A0D2K9F5_9CHLO	unreviewed	Uncharacterized protein	MNEG_1079	Monoraphidium neglectum			protein serine/threonine phosphatase activity [GO:0004722]		protein serine/threonine phosphatase activity [GO:0004722]		25727987
A0A0D2LKE2	A0A0D2LKE2_9CHLO	unreviewed	Uncharacterized protein	MNEG_1080	Monoraphidium neglectum							25727998
A0A0D2MWC4	A0A0D2MWC4_9CHLO	unreviewed	Origin recognition complex subunit 2	MNEG_1081	Monoraphidium neglectum			nucleus [GO:0005634]; origin recognition complex [GO:0000808]; DNA replication [GO:0006260]	DNA replication [GO:0006260]		nucleus [GO:0005634]; origin recognition complex [GO:0000808]	25728009
A0A0D2NRD7	A0A0D2NRD7_9CHLO	unreviewed	Uncharacterized protein	MNEG_1082	Monoraphidium neglectum			integral component of membrane [GO:0016021]			integral component of membrane [GO:0016021]	25728020
A0A0D2N3A6	A0A0D2N3A6_9CHLO	unreviewed	Ankyrin-1	MNEG_1083	Monoraphidium neglectum							25728031
A0A0D2K9G0	A0A0D2K9G0_9CHLO	unreviewed	PsbP domain-containing protein 4	MNEG_1084	Monoraphidium neglectum			extrinsic component of membrane [GO:0019898]; photosystem II oxygen evolving complex [GO:0009654]; calcium ion binding [GO:0005509]; photosynthesis [GO:0015979]	photosynthesis [GO:0015979]	calcium ion binding [GO:0005509]	extrinsic component of membrane [GO:0019898]; photosystem II oxygen evolving complex [GO:0009654]	25728042
A0A0D2LKE7	A0A0D2LKE7_9CHLO	unreviewed	Uncharacterized protein	MNEG_1085	Monoraphidium neglectum							25728053
A0A0D2MWC7	A0A0D2MWC7_9CHLO	unreviewed	Protein viaA	MNEG_1086	Monoraphidium neglectum							25728064
A0A0D2MWB0	A0A0D2MWB0_9CHLO	unreviewed	Glycerophosphodiester phosphodiesterase GDE1	MNEG_1087	Monoraphidium neglectum			glycerophosphocholine phosphodiesterase activity [GO:0047389]; glycerophospholipid catabolic process [GO:0046475]	glycerophospholipid catabolic process [GO:0046475]	glycerophosphocholine phosphodiesterase activity [GO:0047389]		25728075
A0A0D2NRB8	A0A0D2NRB8_9CHLO	unreviewed	Clp protease adaptor protein	MNEG_1088	Monoraphidium neglectum			peptidase activity [GO:0008233]		peptidase activity [GO:0008233]		25728086
A0A0D2N392	A0A0D2N392_9CHLO	unreviewed	Uncharacterized protein	MNEG_1089	Monoraphidium neglectum			integral component of membrane [GO:0016021]			integral component of membrane [GO:0016021]	25728097
A0A0D2K9E4	A0A0D2K9E4_9CHLO	unreviewed	Uncharacterized protein	MNEG_1090	Monoraphidium neglectum							25728108
A0A0D2LKD6	A0A0D2LKD6_9CHLO	unreviewed	Fe-S oxidoreductase	MNEG_1091	Monoraphidium neglectum			catalytic activity [GO:0003824]		catalytic activity [GO:0003824]		25728119
A0A0D2MWB4	A0A0D2MWB4_9CHLO	unreviewed	Adenylate kinase (EC 2.7.4.3)	MNEG_1092	Monoraphidium neglectum			adenylate kinase activity [GO:0004017]; ATP binding [GO:0005524]		adenylate kinase activity [GO:0004017]; ATP binding [GO:0005524]		25728130
A0A0D2NRC5	A0A0D2NRC5_9CHLO	unreviewed	Uncharacterized protein	MNEG_1093	Monoraphidium neglectum			integral component of membrane [GO:0016021]; lipid storage [GO:0019915]	lipid storage [GO:0019915]		integral component of membrane [GO:0016021]	25728141
A0A0D2N395	A0A0D2N395_9CHLO	unreviewed	Elongation factor Ts, mitochondrial (EF-Ts) (EF-TsMt)	EFTS MNEG_1094	Monoraphidium neglectum			mitochondrion [GO:0005739]; translation elongation factor activity [GO:0003746]		translation elongation factor activity [GO:0003746]	mitochondrion [GO:0005739]	25728152
A0A0D2K9E9	A0A0D2K9E9_9CHLO	unreviewed	Uncharacterized protein	MNEG_1095	Monoraphidium neglectum			protein transport [GO:0015031]	protein transport [GO:0015031]			25728163
A0A0D2MWB8	A0A0D2MWB8_9CHLO	unreviewed	Uncharacterized protein (Fragment)	MNEG_1097	Monoraphidium neglectum							25728185
A0A0D2N384	A0A0D2N384_9CHLO	unreviewed	Uncharacterized protein	MNEG_1098	Monoraphidium neglectum			ATP binding [GO:0005524]; mismatched DNA binding [GO:0030983]; mismatch repair [GO:0006298]	mismatch repair [GO:0006298]	ATP binding [GO:0005524]; mismatched DNA binding [GO:0030983]		25728196
A0A0D2K9D8	A0A0D2K9D8_9CHLO	unreviewed	Uncharacterized protein	MNEG_1099	Monoraphidium neglectum			metal ion binding [GO:0046872]		metal ion binding [GO:0046872]		25728207
A0A0D2LKC9	A0A0D2LKC9_9CHLO	unreviewed	Chlorophyll a-b binding protein, chloroplastic	MNEG_1100	Monoraphidium neglectum			chloroplast thylakoid membrane [GO:0009535]; integral component of membrane [GO:0016021]; photosystem I [GO:0009522]; photosystem II [GO:0009523]; chlorophyll binding [GO:0016168]; photosynthesis, light harvesting [GO:0009765]; protein-chromophore linkage [GO:0018298]	photosynthesis, light harvesting [GO:0009765]; protein-chromophore linkage [GO:0018298]	chlorophyll binding [GO:0016168]	chloroplast thylakoid membrane [GO:0009535]; integral component of membrane [GO:0016021]; photosystem I [GO:0009522]; photosystem II [GO:0009523]	25728218
A0A0D2MWA2	A0A0D2MWA2_9CHLO	unreviewed	Uncharacterized protein	MNEG_1101	Monoraphidium neglectum							25728229
A0A0D2NRB0	A0A0D2NRB0_9CHLO	unreviewed	Uncharacterized protein	MNEG_1102	Monoraphidium neglectum							25728240
A0A0D2N387	A0A0D2N387_9CHLO	unreviewed	Putative GTP-binding protein TypA/BipA like protein	MNEG_1103	Monoraphidium neglectum			GTP binding [GO:0005525]; GTPase activity [GO:0003924]		GTPase activity [GO:0003924]; GTP binding [GO:0005525]		25728251
A0A0D2K9E0	A0A0D2K9E0_9CHLO	unreviewed	Uncharacterized protein	MNEG_1104	Monoraphidium neglectum							25728262
A0A0D2LKD4	A0A0D2LKD4_9CHLO	unreviewed	Uncharacterized protein (Fragment)	MNEG_1105	Monoraphidium neglectum			integral component of membrane [GO:0016021]			integral component of membrane [GO:0016021]	25728273
A0A0D2N374	A0A0D2N374_9CHLO	unreviewed	Uncharacterized protein	MNEG_1106	Monoraphidium neglectum							25728284
A0A0D2K9D1	A0A0D2K9D1_9CHLO	unreviewed	Putative lipid kinase yegS-like protein (EC 2.7.1.-)	MNEG_1107	Monoraphidium neglectum			integral component of membrane [GO:0016021]; NAD+ kinase activity [GO:0003951]		NAD+ kinase activity [GO:0003951]	integral component of membrane [GO:0016021]	25728295
A0A0D2LKC2	A0A0D2LKC2_9CHLO	unreviewed	Uncharacterized protein	MNEG_1108	Monoraphidium neglectum							25728306
A0A0D2MW85	A0A0D2MW85_9CHLO	unreviewed	Uncharacterized protein	MNEG_1109	Monoraphidium neglectum							25728317
A0A0D2NR96	A0A0D2NR96_9CHLO	unreviewed	Uncharacterized protein	MNEG_1110	Monoraphidium neglectum							25728328
A0A0D2N378	A0A0D2N378_9CHLO	unreviewed	Uncharacterized protein	MNEG_1111	Monoraphidium neglectum							25728339
A0A0D2K9D4	A0A0D2K9D4_9CHLO	unreviewed	Uncharacterized protein	MNEG_1112	Monoraphidium neglectum							25728350
A0A0D2LKC6	A0A0D2LKC6_9CHLO	unreviewed	Uncharacterized protein	MNEG_1113	Monoraphidium neglectum							25728361
A0A0D2MW93	A0A0D2MW93_9CHLO	unreviewed	Uncharacterized protein	MNEG_1114	Monoraphidium neglectum							25728372
A0A0D2NRA3	A0A0D2NRA3_9CHLO	unreviewed	Uncharacterized protein (Fragment)	MNEG_1115	Monoraphidium neglectum							25728383
A0A0D2LKB3	A0A0D2LKB3_9CHLO	unreviewed	Uncharacterized protein	MNEG_1116	Monoraphidium neglectum							25728394
A0A0D2MW75	A0A0D2MW75_9CHLO	unreviewed	Uncharacterized protein	MNEG_1117	Monoraphidium neglectum							25728405
A0A0D2NR85	A0A0D2NR85_9CHLO	unreviewed	Uncharacterized protein	MNEG_1118	Monoraphidium neglectum							25728416
A0A0D2N368	A0A0D2N368_9CHLO	unreviewed	Uncharacterized protein	MNEG_1119	Monoraphidium neglectum							25728427
A0A0D2K9C7	A0A0D2K9C7_9CHLO	unreviewed	Uncharacterized protein	MNEG_1120	Monoraphidium neglectum							25728438
A0A0D2LKB6	A0A0D2LKB6_9CHLO	unreviewed	Uncharacterized protein	MNEG_1121	Monoraphidium neglectum							25728449
A0A0D2MW81	A0A0D2MW81_9CHLO	unreviewed	Uncharacterized protein	MNEG_1122	Monoraphidium neglectum			amidase activity [GO:0004040]		amidase activity [GO:0004040]		25728460
A0A0D2NR91	A0A0D2NR91_9CHLO	unreviewed	Uncharacterized protein (Fragment)	MNEG_1123	Monoraphidium neglectum							25728471
A0A0D2K9C2	A0A0D2K9C2_9CHLO	unreviewed	Uncharacterized protein	MNEG_1124	Monoraphidium neglectum							25728482
A0A0D2LKA9	A0A0D2LKA9_9CHLO	unreviewed	Uncharacterized protein	MNEG_1125	Monoraphidium neglectum							25728493
A0A0D2MW71	A0A0D2MW71_9CHLO	unreviewed	Polycystic kidney and hepatic disease 1-like 1 (EC 3.2.1.3)	MNEG_1126	Monoraphidium neglectum			glucan 1,4-alpha-glucosidase activity [GO:0004339]; metabolic process [GO:0008152]	metabolic process [GO:0008152]	glucan 1,4-alpha-glucosidase activity [GO:0004339]		25728504
A0A0D2NR80	A0A0D2NR80_9CHLO	unreviewed	Uncharacterized protein	MNEG_1127	Monoraphidium neglectum							25728515
A0A0D2N362	A0A0D2N362_9CHLO	unreviewed	Putative Cystinosin like protein	MNEG_1128	Monoraphidium neglectum			integral component of membrane [GO:0016021]			integral component of membrane [GO:0016021]	25728526
A0A0D2K9C5	A0A0D2K9C5_9CHLO	unreviewed	Uncharacterized protein	MNEG_1129	Monoraphidium neglectum							25728537
A0A0D2K9B5	A0A0D2K9B5_9CHLO	unreviewed	Uncharacterized protein (Fragment)	MNEG_1130	Monoraphidium neglectum							25728548
A0A0D2LKA1	A0A0D2LKA1_9CHLO	unreviewed	Uncharacterized protein	MNEG_1131	Monoraphidium neglectum			heme binding [GO:0020037]; peroxidase activity [GO:0004601]; response to oxidative stress [GO:0006979]	response to oxidative stress [GO:0006979]	heme binding [GO:0020037]; peroxidase activity [GO:0004601]		25728559
A0A0D2MW64	A0A0D2MW64_9CHLO	unreviewed	Uncharacterized protein	MNEG_1132	Monoraphidium neglectum							25728570
A0A0D2NR65	A0A0D2NR65_9CHLO	unreviewed	Uncharacterized protein	MNEG_1133	Monoraphidium neglectum							25728581
A0A0D2N351	A0A0D2N351_9CHLO	unreviewed	Uncharacterized protein	MNEG_1134	Monoraphidium neglectum			integral component of membrane [GO:0016021]			integral component of membrane [GO:0016021]	25728592
A0A0D2K9C0	A0A0D2K9C0_9CHLO	unreviewed	Uncharacterized protein	MNEG_1135	Monoraphidium neglectum							25728603
A0A0D2LKA5	A0A0D2LKA5_9CHLO	unreviewed	Uncharacterized protein	MNEG_1136	Monoraphidium neglectum			integral component of membrane [GO:0016021]			integral component of membrane [GO:0016021]	25728614
A0A0D2MW68	A0A0D2MW68_9CHLO	unreviewed	Uncharacterized protein	MNEG_1137	Monoraphidium neglectum			integral component of membrane [GO:0016021]			integral component of membrane [GO:0016021]	25728625
A0A0D2NR72	A0A0D2NR72_9CHLO	unreviewed	Organic cation transporter protein	MNEG_1138	Monoraphidium neglectum			integral component of membrane [GO:0016021]; transmembrane transporter activity [GO:0022857]		transmembrane transporter activity [GO:0022857]	integral component of membrane [GO:0016021]	25728636
A0A0D2N356	A0A0D2N356_9CHLO	unreviewed	Uncharacterized protein (Fragment)	MNEG_1139	Monoraphidium neglectum							25728647
A0A0D2LK93	A0A0D2LK93_9CHLO	unreviewed	Uncharacterized protein	MNEG_1140	Monoraphidium neglectum							25728658
A0A0D2MW60	A0A0D2MW60_9CHLO	unreviewed	tRNA (Uracil-5-)-methyltransferase (EC 2.1.1.35)	MNEG_1141	Monoraphidium neglectum			S-adenosylmethionine-dependent tRNA (m5U54) methyltransferase activity [GO:0030697]		S-adenosylmethionine-dependent tRNA (m5U54) methyltransferase activity [GO:0030697]		25728669
A0A0D2NR52	A0A0D2NR52_9CHLO	unreviewed	Uncharacterized protein	MNEG_1142	Monoraphidium neglectum			ribosome [GO:0005840]; structural constituent of ribosome [GO:0003735]; translation [GO:0006412]	translation [GO:0006412]	structural constituent of ribosome [GO:0003735]	ribosome [GO:0005840]	25728680
A0A0D2N341	A0A0D2N341_9CHLO	unreviewed	Aquaporin PIP1-2	MNEG_1143	Monoraphidium neglectum			integral component of membrane [GO:0016021]; transporter activity [GO:0005215]		transporter activity [GO:0005215]	integral component of membrane [GO:0016021]	25728691
A0A0D2K9B3	A0A0D2K9B3_9CHLO	unreviewed	Uncharacterized protein	MNEG_1144	Monoraphidium neglectum							25728702
A0A0D2LK96	A0A0D2LK96_9CHLO	unreviewed	Uncharacterized protein	MNEG_1145	Monoraphidium neglectum			3'-5' exonuclease activity [GO:0008408]; DNA binding [GO:0003677]; DNA-directed DNA polymerase activity [GO:0003887]; nucleotide binding [GO:0000166]		3'-5' exonuclease activity [GO:0008408]; DNA binding [GO:0003677]; DNA-directed DNA polymerase activity [GO:0003887]; nucleotide binding [GO:0000166]		25728713
A0A0D2MW61	A0A0D2MW61_9CHLO	unreviewed	Uncharacterized protein	MNEG_1146	Monoraphidium neglectum			calcium ion binding [GO:0005509]		calcium ion binding [GO:0005509]		25728724
A0A0D2NR61	A0A0D2NR61_9CHLO	unreviewed	Uncharacterized protein	MNEG_1147	Monoraphidium neglectum							25728735
A0A0D2N348	A0A0D2N348_9CHLO	unreviewed	Uncharacterized protein	MNEG_1148	Monoraphidium neglectum							25728746
A0A0D2K9A3	A0A0D2K9A3_9CHLO	unreviewed	Vacuolar protein sorting-associated like protein 52	MNEG_1149	Monoraphidium neglectum							25728757
A0A0D2LK87	A0A0D2LK87_9CHLO	unreviewed	Uncharacterized protein	MNEG_1150	Monoraphidium neglectum							25728768
A0A0D2MW53	A0A0D2MW53_9CHLO	unreviewed	ATP-dependent Clp protease proteolytic subunit	MNEG_1151	Monoraphidium neglectum			serine-type endopeptidase activity [GO:0004252]		serine-type endopeptidase activity [GO:0004252]		25728779
A0A0D2NR40	A0A0D2NR40_9CHLO	unreviewed	Uncharacterized protein	MNEG_1152	Monoraphidium neglectum							25728790
A0A0D2N333	A0A0D2N333_9CHLO	unreviewed	Uncharacterized protein	MNEG_1153	Monoraphidium neglectum							25728801
A0A0D2K9A5	A0A0D2K9A5_9CHLO	unreviewed	Uncharacterized protein	MNEG_1154	Monoraphidium neglectum							25728812
A0A0D2LK90	A0A0D2LK90_9CHLO	unreviewed	Uncharacterized protein	MNEG_1155	Monoraphidium neglectum			catalytic activity [GO:0003824]; biosynthetic process [GO:0009058]	biosynthetic process [GO:0009058]	catalytic activity [GO:0003824]		25728823
A0A0D2MW56	A0A0D2MW56_9CHLO	unreviewed	tRNA (Adenine-N1-)-methyltransferase (EC 2.1.1.217)	MNEG_1156	Monoraphidium neglectum			tRNA (m1A) methyltransferase complex [GO:0031515]; phosphatidylinositol phosphate kinase activity [GO:0016307]; tRNA (adenine-N1-)-methyltransferase activity [GO:0016429]		phosphatidylinositol phosphate kinase activity [GO:0016307]; tRNA (adenine-N1-)-methyltransferase activity [GO:0016429]	tRNA (m1A) methyltransferase complex [GO:0031515]	25728834
A0A0D2NR47	A0A0D2NR47_9CHLO	unreviewed	Putative TLC domain-containing protein	MNEG_1157	Monoraphidium neglectum			integral component of membrane [GO:0016021]			integral component of membrane [GO:0016021]	25728845
A0A0D2N336	A0A0D2N336_9CHLO	unreviewed	Actin	MNEG_1158	Monoraphidium neglectum			ATP binding [GO:0005524]		ATP binding [GO:0005524]		25728856
A0A0D2K9B1	A0A0D2K9B1_9CHLO	unreviewed	E3 ubiquitin-protein ligase	MNEG_1159	Monoraphidium neglectum			ligase activity [GO:0016874]; zinc ion binding [GO:0008270]		ligase activity [GO:0016874]; zinc ion binding [GO:0008270]		25728867
A0A0D2NR30	A0A0D2NR30_9CHLO	unreviewed	Glycerol-3-phosphate dehydrogenase [NAD(+)] (EC 1.1.1.8)	MNEG_1160	Monoraphidium neglectum		CATALYTIC ACTIVITY: sn-glycerol 3-phosphate + NAD(+) = glycerone phosphate + NADH. {ECO:0000256|RuleBase:RU361243}.	glycerol-3-phosphate dehydrogenase complex [GO:0009331]; glycerol-3-phosphate dehydrogenase [NAD+] activity [GO:0004367]; NAD binding [GO:0051287]; carbohydrate metabolic process [GO:0005975]; glycerol-3-phosphate catabolic process [GO:0046168]	carbohydrate metabolic process [GO:0005975]; glycerol-3-phosphate catabolic process [GO:0046168]	glycerol-3-phosphate dehydrogenase [NAD+] activity [GO:0004367]; NAD binding [GO:0051287]	glycerol-3-phosphate dehydrogenase complex [GO:0009331]	25728878
A0A0D2N324	A0A0D2N324_9CHLO	unreviewed	Uncharacterized protein	MNEG_1161	Monoraphidium neglectum							25728889
A0A0D2K999	A0A0D2K999_9CHLO	unreviewed	Uncharacterized protein	MNEG_1162	Monoraphidium neglectum							25728900
A0A0D2LK82	A0A0D2LK82_9CHLO	unreviewed	Uncharacterized protein	MNEG_1163	Monoraphidium neglectum			hydrolase activity [GO:0016787]; lipid catabolic process [GO:0016042]	lipid catabolic process [GO:0016042]	hydrolase activity [GO:0016787]		25728911
A0A0D2MW49	A0A0D2MW49_9CHLO	unreviewed	Putative serine/threonine-protein kinase pats1	MNEG_1164	Monoraphidium neglectum			ATP binding [GO:0005524]; protein kinase activity [GO:0004672]		ATP binding [GO:0005524]; protein kinase activity [GO:0004672]		25728922
A0A0D2NR36	A0A0D2NR36_9CHLO	unreviewed	Putative receptor protein kinase TMK1	MNEG_1165	Monoraphidium neglectum			ATP binding [GO:0005524]; protein kinase activity [GO:0004672]		ATP binding [GO:0005524]; protein kinase activity [GO:0004672]		25728933
A0A0D2N329	A0A0D2N329_9CHLO	unreviewed	Uncharacterized protein	MNEG_1166	Monoraphidium neglectum			integral component of membrane [GO:0016021]			integral component of membrane [GO:0016021]	25728944
A0A0D2N316	A0A0D2N316_9CHLO	unreviewed	Structural maintenance of chromosomes protein 5	MNEG_1167	Monoraphidium neglectum			Smc5-Smc6 complex [GO:0030915]; double-strand break repair via homologous recombination [GO:0000724]; sister chromatid cohesion [GO:0007062]	double-strand break repair via homologous recombination [GO:0000724]; sister chromatid cohesion [GO:0007062]		Smc5-Smc6 complex [GO:0030915]	25728955
A0A0D2K989	A0A0D2K989_9CHLO	unreviewed	Uncharacterized protein	MNEG_1168	Monoraphidium neglectum			catalytic activity [GO:0003824]; metabolic process [GO:0008152]	metabolic process [GO:0008152]	catalytic activity [GO:0003824]		25728966
A0A0D2LK74	A0A0D2LK74_9CHLO	unreviewed	Uncharacterized protein	MNEG_1169	Monoraphidium neglectum			integral component of membrane [GO:0016021]; nucleoside transmembrane transporter activity [GO:0005337]		nucleoside transmembrane transporter activity [GO:0005337]	integral component of membrane [GO:0016021]	25728977
A0A0D2MW40	A0A0D2MW40_9CHLO	unreviewed	Uncharacterized protein	MNEG_1170	Monoraphidium neglectum			nucleus [GO:0005634]			nucleus [GO:0005634]	25728988
A0A0D2NR25	A0A0D2NR25_9CHLO	unreviewed	CTD small phosphatase-like protein 2 (EC 3.1.3.-)	MNEG_1171	Monoraphidium neglectum			phosphatase activity [GO:0016791]		phosphatase activity [GO:0016791]		25728999
A0A0D2N319	A0A0D2N319_9CHLO	unreviewed	Uncharacterized protein	MNEG_1172	Monoraphidium neglectum							25729010
A0A0D2K995	A0A0D2K995_9CHLO	unreviewed	Uncharacterized protein	MNEG_1173	Monoraphidium neglectum							25729021
A0A0D2LK79	A0A0D2LK79_9CHLO	unreviewed	Uncharacterized protein	MNEG_1174	Monoraphidium neglectum							25729032
A0A0D2MW45	A0A0D2MW45_9CHLO	unreviewed	Uncharacterized protein	MNEG_1175	Monoraphidium neglectum							25729043
A0A0D2NR12	A0A0D2NR12_9CHLO	unreviewed	Uncharacterized protein	MNEG_1176	Monoraphidium neglectum							25729054
A0A0D2N308	A0A0D2N308_9CHLO	unreviewed	Peptide-methionine (S)-S-oxidereductase (EC 1.8.4.11)	MNEG_1177	Monoraphidium neglectum			peptide-methionine (S)-S-oxide reductase activity [GO:0008113]		peptide-methionine (S)-S-oxide reductase activity [GO:0008113]		25729065
A0A0D2K983	A0A0D2K983_9CHLO	unreviewed	Actin-related protein 4	MNEG_1178	Monoraphidium neglectum							25729076
A0A0D2LK66	A0A0D2LK66_9CHLO	unreviewed	Ribonucleoprotein-associated protein	MNEG_1179	Monoraphidium neglectum			intracellular ribonucleoprotein complex [GO:0030529]; nucleolus [GO:0005730]; viral nucleocapsid [GO:0019013]; RNA binding [GO:0003723]; ribosome biogenesis [GO:0042254]	ribosome biogenesis [GO:0042254]	RNA binding [GO:0003723]	intracellular ribonucleoprotein complex [GO:0030529]; nucleolus [GO:0005730]; viral nucleocapsid [GO:0019013]	25729087
A0A0D2MW33	A0A0D2MW33_9CHLO	unreviewed	Actin-related protein 4	MNEG_1180	Monoraphidium neglectum							25729098
A0A0D2NR16	A0A0D2NR16_9CHLO	unreviewed	Uncharacterized protein	MNEG_1181	Monoraphidium neglectum							25729109
A0A0D2N312	A0A0D2N312_9CHLO	unreviewed	Uncharacterized protein	MNEG_1182	Monoraphidium neglectum							25729120
A0A0D2K985	A0A0D2K985_9CHLO	unreviewed	O-acyltransferase	MNEG_1183	Monoraphidium neglectum			integral component of membrane [GO:0016021]; diacylglycerol O-acyltransferase activity [GO:0004144]; triglyceride biosynthetic process [GO:0019432]	triglyceride biosynthetic process [GO:0019432]	diacylglycerol O-acyltransferase activity [GO:0004144]	integral component of membrane [GO:0016021]	25729131
A0A0D2LK70	A0A0D2LK70_9CHLO	unreviewed	Uncharacterized protein	MNEG_1184	Monoraphidium neglectum							25729142
A0A0D2MW37	A0A0D2MW37_9CHLO	unreviewed	Uncharacterized protein	MNEG_1185	Monoraphidium neglectum							25729153
A0A0D2NR20	A0A0D2NR20_9CHLO	unreviewed	Uncharacterized protein	MNEG_1186	Monoraphidium neglectum							25729164
A0A0D2LK56	A0A0D2LK56_9CHLO	unreviewed	Sacsin	MNEG_1187	Monoraphidium neglectum							25729175
A0A0D2MW30	A0A0D2MW30_9CHLO	unreviewed	Kinesin-related protein	MNEG_1188	Monoraphidium neglectum			ATP binding [GO:0005524]; microtubule binding [GO:0008017]; microtubule motor activity [GO:0003777]; microtubule-based movement [GO:0007018]	microtubule-based movement [GO:0007018]	ATP binding [GO:0005524]; microtubule binding [GO:0008017]; microtubule motor activity [GO:0003777]		25729186
A0A0D2NR09	A0A0D2NR09_9CHLO	unreviewed	Dynein light chain, flagellar outer arm	MNEG_1189	Monoraphidium neglectum			motile cilium [GO:0031514]; calcium ion binding [GO:0005509]		calcium ion binding [GO:0005509]	motile cilium [GO:0031514]	25729197
A0A0D2N303	A0A0D2N303_9CHLO	unreviewed	Uncharacterized protein	MNEG_1190	Monoraphidium neglectum							25729208
A0A0D2K982	A0A0D2K982_9CHLO	unreviewed	Uncharacterized protein	MNEG_1191	Monoraphidium neglectum			integral component of membrane [GO:0016021]; 2 iron, 2 sulfur cluster binding [GO:0051537]; nitrite reductase [NAD(P)H] activity [GO:0008942]; nitrate assimilation [GO:0042128]	nitrate assimilation [GO:0042128]	2 iron, 2 sulfur cluster binding [GO:0051537]; nitrite reductase [NAD(P)H] activity [GO:0008942]	integral component of membrane [GO:0016021]	25729219
A0A0D2LK62	A0A0D2LK62_9CHLO	unreviewed	Uncharacterized protein	MNEG_1192	Monoraphidium neglectum							25729230
A0A0D2MW32	A0A0D2MW32_9CHLO	unreviewed	Uncharacterized protein	MNEG_1193	Monoraphidium neglectum							25729241
A0A0D2LK49	A0A0D2LK49_9CHLO	unreviewed	WD repeat-containing protein 90	MNEG_1194	Monoraphidium neglectum							25729252
A0A0D2MW24	A0A0D2MW24_9CHLO	unreviewed	Sulfonate/nitrate/taurine transport system substrate-binding protein	MNEG_1195	Monoraphidium neglectum			thiamine biosynthetic process [GO:0009228]	thiamine biosynthetic process [GO:0009228]			25729263
A0A0D2NR02	A0A0D2NR02_9CHLO	unreviewed	Uncharacterized protein	MNEG_1196	Monoraphidium neglectum							25729274
A0A0D2N2Z4	A0A0D2N2Z4_9CHLO	unreviewed	Uncharacterized protein	MNEG_1197	Monoraphidium neglectum							25729285
A0A0D2K976	A0A0D2K976_9CHLO	unreviewed	Uncharacterized protein	MNEG_1198	Monoraphidium neglectum			nucleus [GO:0005634]; DNA binding [GO:0003677]		DNA binding [GO:0003677]	nucleus [GO:0005634]	25729296
A0A0D2LK51	A0A0D2LK51_9CHLO	unreviewed	Uncharacterized protein	MNEG_1199	Monoraphidium neglectum			ATP binding [GO:0005524]; protein kinase activity [GO:0004672]		ATP binding [GO:0005524]; protein kinase activity [GO:0004672]		25729307
A0A0D2MW28	A0A0D2MW28_9CHLO	unreviewed	Phenylacetate-CoA ligase (EC 6.2.1.30)	MNEG_1200	Monoraphidium neglectum			phenylacetate-CoA ligase activity [GO:0047475]		phenylacetate-CoA ligase activity [GO:0047475]		25729318
A0A0D2NR04	A0A0D2NR04_9CHLO	unreviewed	Uncharacterized protein	MNEG_1201	Monoraphidium neglectum							25729329
A0A0D2N2Z9	A0A0D2N2Z9_9CHLO	unreviewed	Uncharacterized protein	MNEG_1202	Monoraphidium neglectum							25729340
A0A0D2K979	A0A0D2K979_9CHLO	unreviewed	Uncharacterized protein (Fragment)	MNEG_1203	Monoraphidium neglectum							25729351
A0A0D2LK40	A0A0D2LK40_9CHLO	unreviewed	Uncharacterized protein	MNEG_1204	Monoraphidium neglectum							25729362
A0A0D2MW20	A0A0D2MW20_9CHLO	unreviewed	Uncharacterized protein	MNEG_1205	Monoraphidium neglectum			integral component of membrane [GO:0016021]; lipid transporter activity [GO:0005319]		lipid transporter activity [GO:0005319]	integral component of membrane [GO:0016021]	25729373
A0A0D2NQZ3	A0A0D2NQZ3_9CHLO	unreviewed	Uncharacterized protein	MNEG_1206	Monoraphidium neglectum							25729384
A0A0D2N2Y4	A0A0D2N2Y4_9CHLO	unreviewed	Protein geranylgeranyltransferase typeII (EC 2.5.1.60)	MNEG_1207	Monoraphidium neglectum			Rab geranylgeranyltransferase activity [GO:0004663]; protein geranylgeranylation [GO:0018344]	protein geranylgeranylation [GO:0018344]	Rab geranylgeranyltransferase activity [GO:0004663]		25729395
A0A0D2K971	A0A0D2K971_9CHLO	unreviewed	Uncharacterized protein	MNEG_1208	Monoraphidium neglectum							25729406
A0A0D2LK43	A0A0D2LK43_9CHLO	unreviewed	Uncharacterized protein	MNEG_1209	Monoraphidium neglectum			integral component of membrane [GO:0016021]; transmembrane transport [GO:0055085]	transmembrane transport [GO:0055085]		integral component of membrane [GO:0016021]	25729417
A0A0D2MW23	A0A0D2MW23_9CHLO	unreviewed	Putative NADH-dependent butanol dehydrogenase 1 (EC 1.1.1.-)	MNEG_1210	Monoraphidium neglectum			oxidoreductase activity [GO:0016491]		oxidoreductase activity [GO:0016491]		25729428
A0A0D2NQZ8	A0A0D2NQZ8_9CHLO	unreviewed	Uncharacterized protein	MNEG_1211	Monoraphidium neglectum							25729439
A0A0D2N2Z0	A0A0D2N2Z0_9CHLO	unreviewed	Uncharacterized protein	MNEG_1212	Monoraphidium neglectum			heme binding [GO:0020037]; iron ion binding [GO:0005506]; oxidoreductase activity, acting on paired donors, with incorporation or reduction of molecular oxygen [GO:0016705]		heme binding [GO:0020037]; iron ion binding [GO:0005506]; oxidoreductase activity, acting on paired donors, with incorporation or reduction of molecular oxygen [GO:0016705]		25729450
A0A0D2K974	A0A0D2K974_9CHLO	unreviewed	Cytochrome P450	MNEG_1213	Monoraphidium neglectum			heme binding [GO:0020037]; iron ion binding [GO:0005506]; oxidoreductase activity, acting on paired donors, with incorporation or reduction of molecular oxygen [GO:0016705]		heme binding [GO:0020037]; iron ion binding [GO:0005506]; oxidoreductase activity, acting on paired donors, with incorporation or reduction of molecular oxygen [GO:0016705]		25729461
A0A0D2NQY7	A0A0D2NQY7_9CHLO	unreviewed	Malate dehydrogenase (Oxaloacetate-decarboxylating)(NADP+) (EC 1.1.1.40)	MNEG_1214	Monoraphidium neglectum			malate dehydrogenase (decarboxylating) (NAD+) activity [GO:0004471]; malate dehydrogenase (decarboxylating) (NADP+) activity [GO:0004473]; metal ion binding [GO:0046872]; NAD binding [GO:0051287]; oxaloacetate decarboxylase activity [GO:0008948]		malate dehydrogenase (decarboxylating) (NAD+) activity [GO:0004471]; malate dehydrogenase (decarboxylating) (NADP+) activity [GO:0004473]; metal ion binding [GO:0046872]; NAD binding [GO:0051287]; oxaloacetate decarboxylase activity [GO:0008948]		25729472
A0A0D2N2X0	A0A0D2N2X0_9CHLO	unreviewed	Uncharacterized protein	MNEG_1215	Monoraphidium neglectum			integral component of membrane [GO:0016021]; nucleus [GO:0005634]; nucleosome assembly [GO:0006334]	nucleosome assembly [GO:0006334]		integral component of membrane [GO:0016021]; nucleus [GO:0005634]	25729483
A0A0D2K965	A0A0D2K965_9CHLO	unreviewed	Aldo/keto reductase	MNEG_1216	Monoraphidium neglectum							25729494
A0A0D2LK35	A0A0D2LK35_9CHLO	unreviewed	Uncharacterized protein	MNEG_1217	Monoraphidium neglectum							25729505
A0A0D2MW19	A0A0D2MW19_9CHLO	unreviewed	UreA carboxylase (EC 6.3.4.6)	MNEG_1218	Monoraphidium neglectum			ATP binding [GO:0005524]; biotin carboxylase activity [GO:0004075]; metal ion binding [GO:0046872]; urea carboxylase activity [GO:0004847]		ATP binding [GO:0005524]; biotin carboxylase activity [GO:0004075]; metal ion binding [GO:0046872]; urea carboxylase activity [GO:0004847]		25729516
A0A0D2NQZ0	A0A0D2NQZ0_9CHLO	unreviewed	Aspartyl-tRNA(Asn)/glutamyl-tRNA (Gln)amidotransferase subunit A (EC 6.3.5.7)	MNEG_1219	Monoraphidium neglectum			glutaminyl-tRNA synthase (glutamine-hydrolyzing) activity [GO:0050567]; transferase activity [GO:0016740]		glutaminyl-tRNA synthase (glutamine-hydrolyzing) activity [GO:0050567]; transferase activity [GO:0016740]		25729527
A0A0D2N2X8	A0A0D2N2X8_9CHLO	unreviewed	Putative urea active transporter 1	MNEG_1220	Monoraphidium neglectum			integral component of membrane [GO:0016021]; urea transmembrane transporter activity [GO:0015204]		urea transmembrane transporter activity [GO:0015204]	integral component of membrane [GO:0016021]	25729538
A0A0D2K968	A0A0D2K968_9CHLO	unreviewed	ATP-dependent RNA helicase DDX41 (EC 3.6.1.-)	MNEG_1221	Monoraphidium neglectum			ATP binding [GO:0005524]; helicase activity [GO:0004386]; nucleic acid binding [GO:0003676]		ATP binding [GO:0005524]; helicase activity [GO:0004386]; nucleic acid binding [GO:0003676]		25729549
A0A0D2NQY3	A0A0D2NQY3_9CHLO	unreviewed	Uncharacterized protein	MNEG_1222	Monoraphidium neglectum							25729560
A0A0D2N2W5	A0A0D2N2W5_9CHLO	unreviewed	Sodium channel protein type 1 subunit alpha	MNEG_1223	Monoraphidium neglectum			voltage-gated calcium channel complex [GO:0005891]; voltage-gated calcium channel activity [GO:0005245]		voltage-gated calcium channel activity [GO:0005245]	voltage-gated calcium channel complex [GO:0005891]	25729571
A0A0D2K964	A0A0D2K964_9CHLO	unreviewed	Histone-lysine N-methyltransferase, H3 lysine-79 specific (EC 2.1.1.43) (Histone H3-K79 methyltransferase)	MNEG_1224	Monoraphidium neglectum		CATALYTIC ACTIVITY: S-adenosyl-L-methionine + L-lysine-[histone] = S-adenosyl-L-homocysteine + N(6)-methyl-L-lysine-[histone]. {ECO:0000256|RuleBase:RU271113}.	nucleus [GO:0005634]; histone methyltransferase activity (H3-K79 specific) [GO:0031151]; regulation of cell cycle [GO:0051726]	regulation of cell cycle [GO:0051726]	histone methyltransferase activity (H3-K79 specific) [GO:0031151]	nucleus [GO:0005634]	25729582
A0A0D2LK32	A0A0D2LK32_9CHLO	unreviewed	Uncharacterized protein	MNEG_1225	Monoraphidium neglectum			serine-type endopeptidase activity [GO:0004252]		serine-type endopeptidase activity [GO:0004252]		25729593
A0A0D2MW16	A0A0D2MW16_9CHLO	unreviewed	DEAD-box ATP-dependent RNA helicase 17	MNEG_1226	Monoraphidium neglectum			helicase activity [GO:0004386]		helicase activity [GO:0004386]		25729604
A0A0D2K957	A0A0D2K957_9CHLO	unreviewed	TP53 regulating kinase (EC 2.7.11.1)	MNEG_1227	Monoraphidium neglectum			ATP binding [GO:0005524]; protein serine/threonine kinase activity [GO:0004674]		ATP binding [GO:0005524]; protein serine/threonine kinase activity [GO:0004674]		25729615
A0A0D2LK24	A0A0D2LK24_9CHLO	unreviewed	Uncharacterized protein	MNEG_1228	Monoraphidium neglectum							25729626
A0A0D2MW12	A0A0D2MW12_9CHLO	unreviewed	Uncharacterized protein	MNEG_1229	Monoraphidium neglectum							25729637
A0A0D2NQY0	A0A0D2NQY0_9CHLO	unreviewed	Putative UPF0454 protein C12orf49lags:Precursor	MNEG_1230	Monoraphidium neglectum							25729648
A0A0D2N2V9	A0A0D2N2V9_9CHLO	unreviewed	Peptide chain release factor 1	MNEG_1231	Monoraphidium neglectum			cytoplasm [GO:0005737]; translation release factor activity, codon specific [GO:0016149]		translation release factor activity, codon specific [GO:0016149]	cytoplasm [GO:0005737]	25729659
A0A0D2K960	A0A0D2K960_9CHLO	unreviewed	Uncharacterized protein	MNEG_1232	Monoraphidium neglectum							25729670
A0A0D2LK28	A0A0D2LK28_9CHLO	unreviewed	Uncharacterized protein	MNEG_1233	Monoraphidium neglectum			integral component of membrane [GO:0016021]			integral component of membrane [GO:0016021]	25729681
A0A0D2MW14	A0A0D2MW14_9CHLO	unreviewed	Isocitrate dehydrogenase (EC 1.1.1.42)	MNEG_1234	Monoraphidium neglectum			isocitrate dehydrogenase (NADP+) activity [GO:0004450]; magnesium ion binding [GO:0000287]; NAD binding [GO:0051287]; isocitrate metabolic process [GO:0006102]	isocitrate metabolic process [GO:0006102]	isocitrate dehydrogenase (NADP+) activity [GO:0004450]; magnesium ion binding [GO:0000287]; NAD binding [GO:0051287]		25729692
A0A0D2LK18	A0A0D2LK18_9CHLO	unreviewed	Uncharacterized protein	MNEG_1235	Monoraphidium neglectum							25729703
A0A0D2MW10	A0A0D2MW10_9CHLO	unreviewed	Uncharacterized protein	MNEG_1236	Monoraphidium neglectum			iron ion binding [GO:0005506]; L-ascorbic acid binding [GO:0031418]; oxidoreductase activity, acting on paired donors, with incorporation or reduction of molecular oxygen [GO:0016705]		iron ion binding [GO:0005506]; L-ascorbic acid binding [GO:0031418]; oxidoreductase activity, acting on paired donors, with incorporation or reduction of molecular oxygen [GO:0016705]		25729714
A0A0D2NQX3	A0A0D2NQX3_9CHLO	unreviewed	Uncharacterized protein	MNEG_1237	Monoraphidium neglectum							25729725
A0A0D2N2V3	A0A0D2N2V3_9CHLO	unreviewed	Uncharacterized protein	MNEG_1238	Monoraphidium neglectum			transporter activity [GO:0005215]		transporter activity [GO:0005215]		25729736
A0A0D2K955	A0A0D2K955_9CHLO	unreviewed	Uncharacterized protein	MNEG_1239	Monoraphidium neglectum			integral component of membrane [GO:0016021]			integral component of membrane [GO:0016021]	25729747
A0A0D2LK21	A0A0D2LK21_9CHLO	unreviewed	Inner membrane ALBINO3-like protein 1	MNEG_1240	Monoraphidium neglectum			integral component of membrane [GO:0016021]; protein insertion into membrane [GO:0051205]	protein insertion into membrane [GO:0051205]		integral component of membrane [GO:0016021]	25729758
A0A0D2MW11	A0A0D2MW11_9CHLO	unreviewed	Cyclin-A3-2	MNEG_1241	Monoraphidium neglectum			nucleus [GO:0005634]			nucleus [GO:0005634]	25729769
A0A0D2NQX6	A0A0D2NQX6_9CHLO	unreviewed	Ubiquitin-like domain containing CTD phosphatase 1 (EC 3.1.3.16)	MNEG_1242	Monoraphidium neglectum			nucleus [GO:0005634]; phosphoprotein phosphatase activity [GO:0004721]		phosphoprotein phosphatase activity [GO:0004721]	nucleus [GO:0005634]	25729780
A0A0D2N2V6	A0A0D2N2V6_9CHLO	unreviewed	Uncharacterized protein	MNEG_1243	Monoraphidium neglectum							25729791
A0A0D2K947	A0A0D2K947_9CHLO	unreviewed	AP-1 complex subunit beta-1 (Fragment)	MNEG_1244	Monoraphidium neglectum			membrane coat [GO:0030117]; protein transporter activity [GO:0008565]; intracellular protein transport [GO:0006886]; vesicle-mediated transport [GO:0016192]	intracellular protein transport [GO:0006886]; vesicle-mediated transport [GO:0016192]	protein transporter activity [GO:0008565]	membrane coat [GO:0030117]	25729802
A0A0D2LK12	A0A0D2LK12_9CHLO	unreviewed	Uncharacterized protein	MNEG_1245	Monoraphidium neglectum			RNA binding [GO:0003723]; RNA methyltransferase activity [GO:0008173]; RNA processing [GO:0006396]	RNA processing [GO:0006396]	RNA binding [GO:0003723]; RNA methyltransferase activity [GO:0008173]		25729813
A0A0D2MW08	A0A0D2MW08_9CHLO	unreviewed	Pre-mRNA-splicing factor 38A	MNEG_1246	Monoraphidium neglectum							25729824
A0A0D2NQW6	A0A0D2NQW6_9CHLO	unreviewed	Uncharacterized protein	MNEG_1247	Monoraphidium neglectum			integral component of membrane [GO:0016021]			integral component of membrane [GO:0016021]	25729835
A0A0D2N2U7	A0A0D2N2U7_9CHLO	unreviewed	Uncharacterized protein	MNEG_1248	Monoraphidium neglectum							25729846
A0A0D2K950	A0A0D2K950_9CHLO	unreviewed	Putative ADP-ribosylation factor GTPase-activating protein AGD6	MNEG_1249	Monoraphidium neglectum			GTPase activator activity [GO:0005096]; metal ion binding [GO:0046872]		GTPase activator activity [GO:0005096]; metal ion binding [GO:0046872]		25729857
A0A0D2LK15	A0A0D2LK15_9CHLO	unreviewed	Uncharacterized protein	MNEG_1250	Monoraphidium neglectum			integral component of membrane [GO:0016021]			integral component of membrane [GO:0016021]	25729868
A0A0D2MW09	A0A0D2MW09_9CHLO	unreviewed	Uncharacterized protein	MNEG_1251	Monoraphidium neglectum							25729879
A0A0D2NQW9	A0A0D2NQW9_9CHLO	unreviewed	Uncharacterized protein	MNEG_1252	Monoraphidium neglectum			integral component of membrane [GO:0016021]; transport [GO:0006810]	transport [GO:0006810]		integral component of membrane [GO:0016021]	25729890
A0A0D2N2V1	A0A0D2N2V1_9CHLO	unreviewed	Uncharacterized protein	MNEG_1253	Monoraphidium neglectum							25729901
A0A0D2K953	A0A0D2K953_9CHLO	unreviewed	Chloride channel protein D	MNEG_1254	Monoraphidium neglectum			integral component of membrane [GO:0016021]; voltage-gated chloride channel activity [GO:0005247]		voltage-gated chloride channel activity [GO:0005247]	integral component of membrane [GO:0016021]	25729912
A0A0D2K945	A0A0D2K945_9CHLO	unreviewed	Fanconi anemia, complementation group M (EC 3.6.1.-)	MNEG_1255	Monoraphidium neglectum			ATP binding [GO:0005524]; DNA binding [GO:0003677]; hydrolase activity [GO:0016787]		ATP binding [GO:0005524]; DNA binding [GO:0003677]; hydrolase activity [GO:0016787]		25729923
A0A0D2LK10	A0A0D2LK10_9CHLO	unreviewed	Uncharacterized protein	MNEG_1256	Monoraphidium neglectum			integral component of membrane [GO:0016021]			integral component of membrane [GO:0016021]	25729934
A0A0D2MW02	A0A0D2MW02_9CHLO	unreviewed	Uncharacterized protein	MNEG_1257	Monoraphidium neglectum			integral component of membrane [GO:0016021]; nucleus [GO:0005634]; hydrolase activity [GO:0016787]; cilium assembly [GO:0060271]; lipid catabolic process [GO:0016042]	cilium assembly [GO:0060271]; lipid catabolic process [GO:0016042]	hydrolase activity [GO:0016787]	integral component of membrane [GO:0016021]; nucleus [GO:0005634]	25729945
A0A0D2NQW3	A0A0D2NQW3_9CHLO	unreviewed	Uncharacterized protein	MNEG_1258	Monoraphidium neglectum			integral component of membrane [GO:0016021]			integral component of membrane [GO:0016021]	25729956
A0A0D2N2U4	A0A0D2N2U4_9CHLO	unreviewed	Uncharacterized protein (Fragment)	MNEG_1259	Monoraphidium neglectum							25729967
A0A0D2K939	A0A0D2K939_9CHLO	unreviewed	Ubiquitin-activating enzyme E1 (EC 6.3.2.19)	MNEG_1260	Monoraphidium neglectum			small protein activating enzyme activity [GO:0008641]; cellular protein modification process [GO:0006464]	cellular protein modification process [GO:0006464]	small protein activating enzyme activity [GO:0008641]		25729978
A0A0D2LK05	A0A0D2LK05_9CHLO	unreviewed	Transcription factor	MNEG_1261	Monoraphidium neglectum			single-stranded DNA binding [GO:0003697]; defense response [GO:0006952]; regulation of transcription, DNA-templated [GO:0006355]	defense response [GO:0006952]; regulation of transcription, DNA-templated [GO:0006355]	single-stranded DNA binding [GO:0003697]		25729989
A0A0D2MW00	A0A0D2MW00_9CHLO	unreviewed	Uncharacterized protein	MNEG_1262	Monoraphidium neglectum							25730000
A0A0D2NQW0	A0A0D2NQW0_9CHLO	unreviewed	Uncharacterized protein	MNEG_1263	Monoraphidium neglectum			integral component of membrane [GO:0016021]; metal ion binding [GO:0046872]; nucleic acid binding [GO:0003676]		metal ion binding [GO:0046872]; nucleic acid binding [GO:0003676]	integral component of membrane [GO:0016021]	25730011
A0A0D2N2T5	A0A0D2N2T5_9CHLO	unreviewed	Uncharacterized protein	MNEG_1264	Monoraphidium neglectum							25730022
A0A0D2K943	A0A0D2K943_9CHLO	unreviewed	Uncharacterized protein	MNEG_1265	Monoraphidium neglectum			integral component of membrane [GO:0016021]; transmembrane transport [GO:0055085]	transmembrane transport [GO:0055085]		integral component of membrane [GO:0016021]	25730033
A0A0D2LK06	A0A0D2LK06_9CHLO	unreviewed	Uncharacterized protein	MNEG_1266	Monoraphidium neglectum			integral component of membrane [GO:0016021]			integral component of membrane [GO:0016021]	25730044
A0A0D2MW01	A0A0D2MW01_9CHLO	unreviewed	Uncharacterized protein	MNEG_1267	Monoraphidium neglectum			integral component of membrane [GO:0016021]			integral component of membrane [GO:0016021]	25730055
A0A0D2NQW1	A0A0D2NQW1_9CHLO	unreviewed	Uncharacterized protein	MNEG_1268	Monoraphidium neglectum							25730066
A0A0D2N2T9	A0A0D2N2T9_9CHLO	unreviewed	Sodium/hydrogen exchanger 3	MNEG_1269	Monoraphidium neglectum			integral component of membrane [GO:0016021]; plasma membrane [GO:0005886]; vacuolar membrane [GO:0005774]; solute:proton antiporter activity [GO:0015299]; potassium ion homeostasis [GO:0055075]; response to salt stress [GO:0009651]; sodium ion transport [GO:0006814]	potassium ion homeostasis [GO:0055075]; response to salt stress [GO:0009651]; sodium ion transport [GO:0006814]	solute:proton antiporter activity [GO:0015299]	integral component of membrane [GO:0016021]; plasma membrane [GO:0005886]; vacuolar membrane [GO:0005774]	25730077
A0A0D2LK00	A0A0D2LK00_9CHLO	unreviewed	Cullin 4	MNEG_1270	Monoraphidium neglectum							25730088
A0A0D2MVZ7	A0A0D2MVZ7_9CHLO	unreviewed	Uncharacterized protein	MNEG_1271	Monoraphidium neglectum			integral component of membrane [GO:0016021]			integral component of membrane [GO:0016021]	25730099
A0A0D2NQV6	A0A0D2NQV6_9CHLO	unreviewed	Uncharacterized protein	MNEG_1272	Monoraphidium neglectum			hydrolase activity [GO:0016787]; lipid metabolic process [GO:0006629]	lipid metabolic process [GO:0006629]	hydrolase activity [GO:0016787]		25730110
A0A0D2N2S3	A0A0D2N2S3_9CHLO	unreviewed	30S ribosomal protein S1	MNEG_1273	Monoraphidium neglectum			ribosome [GO:0005840]; nucleic acid binding [GO:0003676]		nucleic acid binding [GO:0003676]	ribosome [GO:0005840]	25730121
A0A0D2K938	A0A0D2K938_9CHLO	unreviewed	Uncharacterized protein	MNEG_1274	Monoraphidium neglectum							25730132
A0A0D2LK03	A0A0D2LK03_9CHLO	unreviewed	Uncharacterized protein	MNEG_1275	Monoraphidium neglectum							25730143
A0A0D2MVZ9	A0A0D2MVZ9_9CHLO	unreviewed	Uncharacterized protein	MNEG_1276	Monoraphidium neglectum			microtubule [GO:0005874]; spindle [GO:0005819]; activation of protein kinase activity [GO:0032147]; regulation of mitotic spindle organization [GO:0060236]	activation of protein kinase activity [GO:0032147]; regulation of mitotic spindle organization [GO:0060236]		microtubule [GO:0005874]; spindle [GO:0005819]	25730154
A0A0D2NQV7	A0A0D2NQV7_9CHLO	unreviewed	Uncharacterized protein	MNEG_1277	Monoraphidium neglectum			microtubule [GO:0005874]; spindle [GO:0005819]; activation of protein kinase activity [GO:0032147]; regulation of mitotic spindle organization [GO:0060236]	activation of protein kinase activity [GO:0032147]; regulation of mitotic spindle organization [GO:0060236]		microtubule [GO:0005874]; spindle [GO:0005819]	25730165
A0A0D2N2S9	A0A0D2N2S9_9CHLO	unreviewed	Leucine-rich repeat-containing protein 9	MNEG_1278	Monoraphidium neglectum							25730176
A0A0D2MVZ1	A0A0D2MVZ1_9CHLO	unreviewed	SEC14 cytosolic factor	MNEG_1279	Monoraphidium neglectum							25730187
A0A0D2NQV0	A0A0D2NQV0_9CHLO	unreviewed	Uncharacterized protein	MNEG_1280	Monoraphidium neglectum							25730198
A0A0D2N2R1	A0A0D2N2R1_9CHLO	unreviewed	Histone deacetylase	MNEG_1281	Monoraphidium neglectum			NAD+ binding [GO:0070403]		NAD+ binding [GO:0070403]		25730209
A0A0D2K933	A0A0D2K933_9CHLO	unreviewed	S-adenosylmethionine synthase (EC 2.5.1.6)	MNEG_1282	Monoraphidium neglectum	PATHWAY: Amino-acid biosynthesis; S-adenosyl-L-methionine biosynthesis; S-adenosyl-L-methionine from L-methionine: step 1/1. {ECO:0000256|RuleBase:RU000541}.	CATALYTIC ACTIVITY: ATP + L-methionine + H(2)O = phosphate + diphosphate + S-adenosyl-L-methionine. {ECO:0000256|RuleBase:RU000541}.	ATP binding [GO:0005524]; metal ion binding [GO:0046872]; methionine adenosyltransferase activity [GO:0004478]; one-carbon metabolic process [GO:0006730]; S-adenosylmethionine biosynthetic process [GO:0006556]	one-carbon metabolic process [GO:0006730]; S-adenosylmethionine biosynthetic process [GO:0006556]	ATP binding [GO:0005524]; metal ion binding [GO:0046872]; methionine adenosyltransferase activity [GO:0004478]		25730220
A0A0D2LJZ9	A0A0D2LJZ9_9CHLO	unreviewed	Uncharacterized protein	MNEG_1283	Monoraphidium neglectum							25730231
A0A0D2MVZ3	A0A0D2MVZ3_9CHLO	unreviewed	Uncharacterized protein	MNEG_1284	Monoraphidium neglectum							25730242
A0A0D2NQV3	A0A0D2NQV3_9CHLO	unreviewed	Uncharacterized protein	MNEG_1285	Monoraphidium neglectum							25730253
A0A0D2N2R8	A0A0D2N2R8_9CHLO	unreviewed	Uncharacterized protein	MNEG_1286	Monoraphidium neglectum							25730264
A0A0D2K936	A0A0D2K936_9CHLO	unreviewed	Uncharacterized protein	MNEG_1287	Monoraphidium neglectum			glycogen (starch) synthase activity [GO:0004373]		glycogen (starch) synthase activity [GO:0004373]		25730275
A0A0D2MVY2	A0A0D2MVY2_9CHLO	unreviewed	Exosome complex exonuclease DIS3/RRP44 (EC 3.1.13.-)	MNEG_1288	Monoraphidium neglectum			exonuclease activity [GO:0004527]		exonuclease activity [GO:0004527]		25730286
A0A0D2NQU5	A0A0D2NQU5_9CHLO	unreviewed	Uncharacterized protein	MNEG_1289	Monoraphidium neglectum			nuclease activity [GO:0004518]; U6 snRNA 3'-end processing [GO:0034477]	U6 snRNA 3'-end processing [GO:0034477]	nuclease activity [GO:0004518]		25730297
A0A0D2N2Q4	A0A0D2N2Q4_9CHLO	unreviewed	Uncharacterized protein	MNEG_1290	Monoraphidium neglectum							25730308
A0A0D2K928	A0A0D2K928_9CHLO	unreviewed	Uncharacterized protein	MNEG_1291	Monoraphidium neglectum			ATP binding [GO:0005524]; protein kinase activity [GO:0004672]		ATP binding [GO:0005524]; protein kinase activity [GO:0004672]		25730319
A0A0D2LJZ3	A0A0D2LJZ3_9CHLO	unreviewed	Uncharacterized protein	MNEG_1292	Monoraphidium neglectum			integral component of membrane [GO:0016021]; ATPase activity [GO:0016887]; nucleotide binding [GO:0000166]; cation transport [GO:0006812]	cation transport [GO:0006812]	ATPase activity [GO:0016887]; nucleotide binding [GO:0000166]	integral component of membrane [GO:0016021]	25730330
A0A0D2MVY8	A0A0D2MVY8_9CHLO	unreviewed	Protein-S-isoprenylcysteine O-methyltransferase (EC 2.1.1.100)	MNEG_1293	Monoraphidium neglectum		CATALYTIC ACTIVITY: S-adenosyl-L-methionine + protein C-terminal S-farnesyl-L-cysteine = S-adenosyl-L-homocysteine + protein C-terminal S-farnesyl-L-cysteine methyl ester. {ECO:0000256|RuleBase:RU362022}.	endoplasmic reticulum membrane [GO:0005789]; integral component of membrane [GO:0016021]; protein C-terminal S-isoprenylcysteine carboxyl O-methyltransferase activity [GO:0004671]		protein C-terminal S-isoprenylcysteine carboxyl O-methyltransferase activity [GO:0004671]	endoplasmic reticulum membrane [GO:0005789]; integral component of membrane [GO:0016021]	25730341
A0A0D2NQU9	A0A0D2NQU9_9CHLO	unreviewed	30S ribosomal protein S1	MNEG_1294	Monoraphidium neglectum			ribosome [GO:0005840]; nucleic acid binding [GO:0003676]		nucleic acid binding [GO:0003676]	ribosome [GO:0005840]	25730352
A0A0D2N2Q8	A0A0D2N2Q8_9CHLO	unreviewed	Uncharacterized protein	MNEG_1295	Monoraphidium neglectum							25730363
A0A0D2K931	A0A0D2K931_9CHLO	unreviewed	Uncharacterized protein	MNEG_1296	Monoraphidium neglectum							25730374
A0A0D2LJZ7	A0A0D2LJZ7_9CHLO	unreviewed	Uncharacterized protein (Fragment)	MNEG_1297	Monoraphidium neglectum							25730385
A0A0D2NQT6	A0A0D2NQT6_9CHLO	unreviewed	Carotenoid isomerase (EC 5.-.-.-)	MNEG_1298	Monoraphidium neglectum			isomerase activity [GO:0016853]; oxidoreductase activity [GO:0016491]		isomerase activity [GO:0016853]; oxidoreductase activity [GO:0016491]		25730396
A0A0D2N2P0	A0A0D2N2P0_9CHLO	unreviewed	40S ribosomal protein S10	MNEG_1299	Monoraphidium neglectum			ribosome [GO:0005840]			ribosome [GO:0005840]	25730407
A0A0D2K921	A0A0D2K921_9CHLO	unreviewed	Uncharacterized protein	MNEG_1300	Monoraphidium neglectum							25730418
A0A0D2LJY2	A0A0D2LJY2_9CHLO	unreviewed	Uncharacterized protein	MNEG_1301	Monoraphidium neglectum			integral component of membrane [GO:0016021]			integral component of membrane [GO:0016021]	25730429
A0A0D2MVY0	A0A0D2MVY0_9CHLO	unreviewed	Uncharacterized protein	MNEG_1302	Monoraphidium neglectum			hydrolase activity, hydrolyzing O-glycosyl compounds [GO:0004553]; carbohydrate metabolic process [GO:0005975]	carbohydrate metabolic process [GO:0005975]	hydrolase activity, hydrolyzing O-glycosyl compounds [GO:0004553]		25730440
A0A0D2NQU3	A0A0D2NQU3_9CHLO	unreviewed	Uncharacterized protein	MNEG_1303	Monoraphidium neglectum			phosphotransferase activity, alcohol group as acceptor [GO:0016773]; racemase and epimerase activity, acting on carbohydrates and derivatives [GO:0016857]; carbohydrate metabolic process [GO:0005975]	carbohydrate metabolic process [GO:0005975]	phosphotransferase activity, alcohol group as acceptor [GO:0016773]; racemase and epimerase activity, acting on carbohydrates and derivatives [GO:0016857]		25730451
A0A0D2N2Q0	A0A0D2N2Q0_9CHLO	unreviewed	Uncharacterized protein	MNEG_1304	Monoraphidium neglectum							25730462
A0A0D2K926	A0A0D2K926_9CHLO	unreviewed	Uncharacterized protein	MNEG_1305	Monoraphidium neglectum			intracellular ribonucleoprotein complex [GO:0030529]			intracellular ribonucleoprotein complex [GO:0030529]	25730473
A0A0D2LJY8	A0A0D2LJY8_9CHLO	unreviewed	Uncharacterized protein	MNEG_1306	Monoraphidium neglectum			hydrolase activity, hydrolyzing O-glycosyl compounds [GO:0004553]; carbohydrate metabolic process [GO:0005975]	carbohydrate metabolic process [GO:0005975]	hydrolase activity, hydrolyzing O-glycosyl compounds [GO:0004553]		25730484
A0A0D2LJU0	A0A0D2LJU0_9CHLO	unreviewed	Uncharacterized protein	MNEG_1307	Monoraphidium neglectum							25730495
A0A0D2MVW5	A0A0D2MVW5_9CHLO	unreviewed	Uncharacterized protein	MNEG_1308	Monoraphidium neglectum							25730506
A0A0D2NQR3	A0A0D2NQR3_9CHLO	unreviewed	Uncharacterized protein	MNEG_1309	Monoraphidium neglectum			phosphatidylinositol binding [GO:0035091]		phosphatidylinositol binding [GO:0035091]		25730517
A0A0D2N2L1	A0A0D2N2L1_9CHLO	unreviewed	Magnesium transporter mgtE	MNEG_1310	Monoraphidium neglectum			integral component of membrane [GO:0016021]; cation transmembrane transporter activity [GO:0008324]		cation transmembrane transporter activity [GO:0008324]	integral component of membrane [GO:0016021]	25730528
A0A0D2K905	A0A0D2K905_9CHLO	unreviewed	Putative nucleosome assembly protein	MNEG_1311	Monoraphidium neglectum			nucleus [GO:0005634]; nucleosome assembly [GO:0006334]	nucleosome assembly [GO:0006334]		nucleus [GO:0005634]	25730539
A0A0D2LJV3	A0A0D2LJV3_9CHLO	unreviewed	Uncharacterized protein	MNEG_1312	Monoraphidium neglectum			cysteine-type peptidase activity [GO:0008234]		cysteine-type peptidase activity [GO:0008234]		25730550
A0A0D2MVX6	A0A0D2MVX6_9CHLO	unreviewed	Protein phosphatase 2 (Formerly 2A), regulatory subunit B (EC 3.1.3.16)	MNEG_1313	Monoraphidium neglectum			calcium ion binding [GO:0005509]; phosphoprotein phosphatase activity [GO:0004721]		calcium ion binding [GO:0005509]; phosphoprotein phosphatase activity [GO:0004721]		25730561
A0A0D2MVV4	A0A0D2MVV4_9CHLO	unreviewed	Uncharacterized protein	MNEG_1314	Monoraphidium neglectum							25730572
A0A0D2NQQ1	A0A0D2NQQ1_9CHLO	unreviewed	Uncharacterized protein	MNEG_1315	Monoraphidium neglectum			integral component of membrane [GO:0016021]; ATP binding [GO:0005524]; ATPase activity [GO:0016887]; transporter activity [GO:0005215]		ATPase activity [GO:0016887]; ATP binding [GO:0005524]; transporter activity [GO:0005215]	integral component of membrane [GO:0016021]	25730583
A0A0D2N2J3	A0A0D2N2J3_9CHLO	unreviewed	Uncharacterized protein	MNEG_1316	Monoraphidium neglectum			periplasmic space [GO:0042597]; lyase activity [GO:0016829]		lyase activity [GO:0016829]	periplasmic space [GO:0042597]	25730594
A0A0D2K8Z3	A0A0D2K8Z3_9CHLO	unreviewed	Uncharacterized protein	MNEG_1317	Monoraphidium neglectum							25730605
A0A0D2LJT1	A0A0D2LJT1_9CHLO	unreviewed	Uncharacterized protein	MNEG_1318	Monoraphidium neglectum			integral component of membrane [GO:0016021]			integral component of membrane [GO:0016021]	25730616
A0A0D2MVW0	A0A0D2MVW0_9CHLO	unreviewed	3-ketoacyl-CoA synthase (EC 2.3.1.-)	MNEG_1319	Monoraphidium neglectum	PATHWAY: Lipid metabolism; fatty acid biosynthesis. {ECO:0000256|PIRNR:PIRNR036417}.		integral component of membrane [GO:0016021]; transferase activity, transferring acyl groups other than amino-acyl groups [GO:0016747]; fatty acid biosynthetic process [GO:0006633]	fatty acid biosynthetic process [GO:0006633]	transferase activity, transferring acyl groups other than amino-acyl groups [GO:0016747]	integral component of membrane [GO:0016021]	25730627
A0A0D2NQQ7	A0A0D2NQQ7_9CHLO	unreviewed	Uncharacterized protein	MNEG_1320	Monoraphidium neglectum							25730638
A0A0D2N2J9	A0A0D2N2J9_9CHLO	unreviewed	Prostaglandin E synthase 2 (EC 5.3.99.3)	MNEG_1321	Monoraphidium neglectum			prostaglandin-E synthase activity [GO:0050220]		prostaglandin-E synthase activity [GO:0050220]		25730649
A0A0D2K8Z8	A0A0D2K8Z8_9CHLO	unreviewed	Transcription initiation factor TFIID subunit 5	MNEG_1322	Monoraphidium neglectum			translation initiation factor activity [GO:0003743]		translation initiation factor activity [GO:0003743]		25730660
A0A0D2NQN3	A0A0D2NQN3_9CHLO	unreviewed	Uncharacterized protein	MNEG_1323	Monoraphidium neglectum							25730671
A0A0D2N2H8	A0A0D2N2H8_9CHLO	unreviewed	Uncharacterized protein	MNEG_1324	Monoraphidium neglectum							25730682
A0A0D2K8Y0	A0A0D2K8Y0_9CHLO	unreviewed	Uncharacterized protein	MNEG_1325	Monoraphidium neglectum							25730693
A0A0D2LJR4	A0A0D2LJR4_9CHLO	unreviewed	Uncharacterized protein	MNEG_1326	Monoraphidium neglectum			hydrolase activity [GO:0016787]; phosphatidylinositol dephosphorylation [GO:0046856]	phosphatidylinositol dephosphorylation [GO:0046856]	hydrolase activity [GO:0016787]		25730704
A0A0D2MVU8	A0A0D2MVU8_9CHLO	unreviewed	Uncharacterized protein	MNEG_1327	Monoraphidium neglectum							25730715
A0A0D2NQP5	A0A0D2NQP5_9CHLO	unreviewed	Uncharacterized protein	MNEG_1328	Monoraphidium neglectum			hydrolase activity [GO:0016787]		hydrolase activity [GO:0016787]		25730726
A0A0D2N2I4	A0A0D2N2I4_9CHLO	unreviewed	Zinc finger A20 and AN1 domain-containing stress-associated protein 6	MNEG_1329	Monoraphidium neglectum			zinc ion binding [GO:0008270]		zinc ion binding [GO:0008270]		25730737
A0A0D2K8Y6	A0A0D2K8Y6_9CHLO	unreviewed	RNA polymerase II transcription factor B subunit 2	MNEG_1330	Monoraphidium neglectum			core TFIIH complex [GO:0000439]; ATP-dependent DNA helicase activity [GO:0004003]; nucleotide-excision repair [GO:0006289]; regulation of transcription, DNA-templated [GO:0006355]; transcription, DNA-templated [GO:0006351]	nucleotide-excision repair [GO:0006289]; regulation of transcription, DNA-templated [GO:0006355]; transcription, DNA-templated [GO:0006351]	ATP-dependent DNA helicase activity [GO:0004003]	core TFIIH complex [GO:0000439]	25730748
A0A0D2LJS4	A0A0D2LJS4_9CHLO	unreviewed	Putative Signal recognition particle protein	MNEG_1331	Monoraphidium neglectum			signal recognition particle [GO:0048500]; 7S RNA binding [GO:0008312]; GTP binding [GO:0005525]; SRP-dependent cotranslational protein targeting to membrane [GO:0006614]	SRP-dependent cotranslational protein targeting to membrane [GO:0006614]	7S RNA binding [GO:0008312]; GTP binding [GO:0005525]	signal recognition particle [GO:0048500]	25730759
A0A0D2LJP8	A0A0D2LJP8_9CHLO	unreviewed	Uncharacterized protein	MNEG_1332	Monoraphidium neglectum			integral component of membrane [GO:0016021]			integral component of membrane [GO:0016021]	25730770
A0A0D2MVT4	A0A0D2MVT4_9CHLO	unreviewed	Superoxide dismutase, Fe-Mn family (EC 1.15.1.1)	MNEG_1333	Monoraphidium neglectum			metal ion binding [GO:0046872]; superoxide dismutase activity [GO:0004784]		metal ion binding [GO:0046872]; superoxide dismutase activity [GO:0004784]		25730781
A0A0D2NQM3	A0A0D2NQM3_9CHLO	unreviewed	Ankyrin-1	MNEG_1334	Monoraphidium neglectum							25730792
A0A0D2N2G8	A0A0D2N2G8_9CHLO	unreviewed	Dr1-associated corepressor	MNEG_1335	Monoraphidium neglectum			nucleus [GO:0005634]; protein heterodimerization activity [GO:0046982]		protein heterodimerization activity [GO:0046982]	nucleus [GO:0005634]	25730803
A0A0D2K8X4	A0A0D2K8X4_9CHLO	unreviewed	Syntaxin-72	MNEG_1336	Monoraphidium neglectum			integral component of membrane [GO:0016021]; intracellular [GO:0005622]; SNAP receptor activity [GO:0005484]; intracellular protein transport [GO:0006886]	intracellular protein transport [GO:0006886]	SNAP receptor activity [GO:0005484]	integral component of membrane [GO:0016021]; intracellular [GO:0005622]	25730814
A0A0D2LJQ6	A0A0D2LJQ6_9CHLO	unreviewed	Glucose-6-phosphate 1-dehydrogenase (EC 1.1.1.49)	MNEG_1337	Monoraphidium neglectum	PATHWAY: Carbohydrate degradation; pentose phosphate pathway; D-ribulose 5-phosphate from D-glucose 6-phosphate (oxidative stage): step 1/3. {ECO:0000256|RuleBase:RU362120}.	CATALYTIC ACTIVITY: D-glucose 6-phosphate + NADP(+) = 6-phospho-D-glucono-1,5-lactone + NADPH. {ECO:0000256|RuleBase:RU362120}.	glucose-6-phosphate dehydrogenase activity [GO:0004345]; NADP binding [GO:0050661]; glucose metabolic process [GO:0006006]; pentose-phosphate shunt [GO:0006098]	glucose metabolic process [GO:0006006]; pentose-phosphate shunt [GO:0006098]	glucose-6-phosphate dehydrogenase activity [GO:0004345]; NADP binding [GO:0050661]		25730825
A0A0D2MVU3	A0A0D2MVU3_9CHLO	unreviewed	Uncharacterized protein	MNEG_1338	Monoraphidium neglectum							25730836
A0A0D2MVS3	A0A0D2MVS3_9CHLO	unreviewed	Uncharacterized protein	MNEG_1339	Monoraphidium neglectum			ATP binding [GO:0005524]; protein kinase activity [GO:0004672]		ATP binding [GO:0005524]; protein kinase activity [GO:0004672]		25730847
A0A0D2NQL0	A0A0D2NQL0_9CHLO	unreviewed	3-methyl-2-oxobutanoate hydroxymethyltransferase (EC 2.1.2.11)	MNEG_1340	Monoraphidium neglectum	PATHWAY: Cofactor biosynthesis; (R)-pantothenate biosynthesis; (R)-pantoate from 3-methyl-2-oxobutanoate: step 1/2. {ECO:0000256|RuleBase:RU362100}.	CATALYTIC ACTIVITY: 5,10-methylenetetrahydrofolate + 3-methyl-2-oxobutanoate + H(2)O = tetrahydrofolate + 2-dehydropantoate. {ECO:0000256|RuleBase:RU362100}.	3-methyl-2-oxobutanoate hydroxymethyltransferase activity [GO:0003864]; methyltransferase activity [GO:0008168]; pantothenate biosynthetic process [GO:0015940]	pantothenate biosynthetic process [GO:0015940]	3-methyl-2-oxobutanoate hydroxymethyltransferase activity [GO:0003864]; methyltransferase activity [GO:0008168]		25730858
A0A0D2N2F6	A0A0D2N2F6_9CHLO	unreviewed	Uncharacterized protein	MNEG_1341	Monoraphidium neglectum							25730869
A0A0D2K8V8	A0A0D2K8V8_9CHLO	unreviewed	Uncharacterized protein	MNEG_1342	Monoraphidium neglectum							25730880
A0A0D2LJN9	A0A0D2LJN9_9CHLO	unreviewed	Uncharacterized protein	MNEG_1343	Monoraphidium neglectum			proteasome regulatory particle, lid subcomplex [GO:0008541]; mRNA export from nucleus [GO:0006406]; proteasome assembly [GO:0043248]	mRNA export from nucleus [GO:0006406]; proteasome assembly [GO:0043248]		proteasome regulatory particle, lid subcomplex [GO:0008541]	25730891
A0A0D2MVS8	A0A0D2MVS8_9CHLO	unreviewed	Uncharacterized protein	MNEG_1344	Monoraphidium neglectum							25730902
A0A0D2NQL6	A0A0D2NQL6_9CHLO	unreviewed	Putative transporter	MNEG_1345	Monoraphidium neglectum			integral component of membrane [GO:0016021]			integral component of membrane [GO:0016021]	25730913
A0A0D2N2G1	A0A0D2N2G1_9CHLO	unreviewed	Ferredoxin--NADP reductase (EC 1.18.1.2)	MNEG_1346	Monoraphidium neglectum		CATALYTIC ACTIVITY: 2 reduced ferredoxin + NADP(+) + H(+) = 2 oxidized ferredoxin + NADPH. {ECO:0000256|RuleBase:RU004465}.	ferredoxin-NADP+ reductase activity [GO:0004324]		ferredoxin-NADP+ reductase activity [GO:0004324]		25730924
A0A0D2K8W7	A0A0D2K8W7_9CHLO	unreviewed	CCR4-NOT transcription complex subunit6 (EC 3.1.-.-)	MNEG_1347	Monoraphidium neglectum			hydrolase activity [GO:0016787]		hydrolase activity [GO:0016787]		25730935
A0A0D2MVR1	A0A0D2MVR1_9CHLO	unreviewed	Uncharacterized protein	MNEG_1348	Monoraphidium neglectum							25730946
A0A0D2NQJ6	A0A0D2NQJ6_9CHLO	unreviewed	Chlorophyll a-b binding protein, chloroplastic	MNEG_1349	Monoraphidium neglectum			chloroplast thylakoid membrane [GO:0009535]; integral component of membrane [GO:0016021]; photosystem I [GO:0009522]; photosystem II [GO:0009523]; chlorophyll binding [GO:0016168]; photosynthesis, light harvesting [GO:0009765]; protein-chromophore linkage [GO:0018298]	photosynthesis, light harvesting [GO:0009765]; protein-chromophore linkage [GO:0018298]	chlorophyll binding [GO:0016168]	chloroplast thylakoid membrane [GO:0009535]; integral component of membrane [GO:0016021]; photosystem I [GO:0009522]; photosystem II [GO:0009523]	25730957
A0A0D2N2E0	A0A0D2N2E0_9CHLO	unreviewed	Uncharacterized protein	MNEG_1350	Monoraphidium neglectum			integral component of membrane [GO:0016021]			integral component of membrane [GO:0016021]	25730968
A0A0D2K8U4	A0A0D2K8U4_9CHLO	unreviewed	Uncharacterized protein	MNEG_1351	Monoraphidium neglectum			integral component of membrane [GO:0016021]; iron ion binding [GO:0005506]; oxidoreductase activity [GO:0016491]; lipid biosynthetic process [GO:0008610]	lipid biosynthetic process [GO:0008610]	iron ion binding [GO:0005506]; oxidoreductase activity [GO:0016491]	integral component of membrane [GO:0016021]	25730979
A0A0D2LJM0	A0A0D2LJM0_9CHLO	unreviewed	Uncharacterized protein	MNEG_1352	Monoraphidium neglectum			integral component of membrane [GO:0016021]			integral component of membrane [GO:0016021]	25730990
A0A0D2MVR7	A0A0D2MVR7_9CHLO	unreviewed	Uncharacterized protein	MNEG_1353	Monoraphidium neglectum			integral component of membrane [GO:0016021]			integral component of membrane [GO:0016021]	25731001
A0A0D2NQK4	A0A0D2NQK4_9CHLO	unreviewed	Starch synthase, chloroplastic/amyloplastic (EC 2.4.1.-)	MNEG_1354	Monoraphidium neglectum	PATHWAY: Glycan biosynthesis; starch biosynthesis. {ECO:0000256|RuleBase:RU361232}.		amyloplast [GO:0009501]; chloroplast [GO:0009507]; glycogen (starch) synthase activity [GO:0004373]; starch biosynthetic process [GO:0019252]	starch biosynthetic process [GO:0019252]	glycogen (starch) synthase activity [GO:0004373]	amyloplast [GO:0009501]; chloroplast [GO:0009507]	25731012
A0A0D2N2E9	A0A0D2N2E9_9CHLO	unreviewed	Uncharacterized protein	MNEG_1355	Monoraphidium neglectum							25731023
A0A0D2K8V1	A0A0D2K8V1_9CHLO	unreviewed	Uncharacterized protein	MNEG_1356	Monoraphidium neglectum							25731034
A0A0D2LJN0	A0A0D2LJN0_9CHLO	unreviewed	WD repeat-containing protein 75 (Fragment)	MNEG_1357	Monoraphidium neglectum							25731045
A0A0D2K8T1	A0A0D2K8T1_9CHLO	unreviewed	Uncharacterized protein	MNEG_1358	Monoraphidium neglectum							25731056
A0A0D2LJK8	A0A0D2LJK8_9CHLO	unreviewed	Uncharacterized protein	MNEG_1359	Monoraphidium neglectum			integral component of membrane [GO:0016021]			integral component of membrane [GO:0016021]	25731067
A0A0D2MVQ5	A0A0D2MVQ5_9CHLO	unreviewed	Uncharacterized protein	MNEG_1360	Monoraphidium neglectum			integral component of membrane [GO:0016021]			integral component of membrane [GO:0016021]	25731078
A0A0D2NQJ0	A0A0D2NQJ0_9CHLO	unreviewed	Isovaleryl-CoA dehydrogenase (EC 1.3.8.4)	MNEG_1361	Monoraphidium neglectum			acyl-CoA dehydrogenase activity [GO:0003995]		acyl-CoA dehydrogenase activity [GO:0003995]		25731089
A0A0D2N2D3	A0A0D2N2D3_9CHLO	unreviewed	Isovaleryl-CoA dehydrogenase (EC 1.3.8.4)	MNEG_1362	Monoraphidium neglectum			acyl-CoA dehydrogenase activity [GO:0003995]; flavin adenine dinucleotide binding [GO:0050660]		acyl-CoA dehydrogenase activity [GO:0003995]; flavin adenine dinucleotide binding [GO:0050660]		25731100
A0A0D2K8T6	A0A0D2K8T6_9CHLO	unreviewed	Coiled-coil domain-containing protein	MNEG_1363	Monoraphidium neglectum							25731111
A0A0D2LJL4	A0A0D2LJL4_9CHLO	unreviewed	Starch synthase (EC 2.4.1.21)	MNEG_1364	Monoraphidium neglectum			alpha-1,4-glucan synthase activity [GO:0033201]; starch binding [GO:2001070]; starch synthase activity [GO:0009011]		alpha-1,4-glucan synthase activity [GO:0033201]; starch binding [GO:2001070]; starch synthase activity [GO:0009011]		25731122
A0A0D2LJJ8	A0A0D2LJJ8_9CHLO	unreviewed	Uncharacterized protein	MNEG_1365	Monoraphidium neglectum							25731133
A0A0D2MVP2	A0A0D2MVP2_9CHLO	unreviewed	Zinc finger protein bud20	MNEG_1366	Monoraphidium neglectum			nucleic acid binding [GO:0003676]; zinc ion binding [GO:0008270]		nucleic acid binding [GO:0003676]; zinc ion binding [GO:0008270]		25731144
A0A0D2NQH8	A0A0D2NQH8_9CHLO	unreviewed	Uncharacterized protein	MNEG_1367	Monoraphidium neglectum							25731155
A0A0D2N2A9	A0A0D2N2A9_9CHLO	unreviewed	Uncharacterized protein	MNEG_1368	Monoraphidium neglectum			ribosome [GO:0005840]; structural constituent of ribosome [GO:0003735]; translation [GO:0006412]	translation [GO:0006412]	structural constituent of ribosome [GO:0003735]	ribosome [GO:0005840]	25731166
A0A0D2K8S4	A0A0D2K8S4_9CHLO	unreviewed	Protein phosphatase (EC 3.1.3.48)	MNEG_1369	Monoraphidium neglectum			protein tyrosine phosphatase activity [GO:0004725]; regulation of exit from mitosis [GO:0007096]	regulation of exit from mitosis [GO:0007096]	protein tyrosine phosphatase activity [GO:0004725]		25731177
A0A0D2LJK3	A0A0D2LJK3_9CHLO	unreviewed	Uncharacterized protein	MNEG_1370	Monoraphidium neglectum							25731188
A0A0D2MVP9	A0A0D2MVP9_9CHLO	unreviewed	Replication factor A2	MNEG_1371	Monoraphidium neglectum			nucleic acid binding [GO:0003676]		nucleic acid binding [GO:0003676]		25731199
A0A0D2NQI4	A0A0D2NQI4_9CHLO	unreviewed	Uncharacterized protein	MNEG_1372	Monoraphidium neglectum							25731210
A0A0D2N2C0	A0A0D2N2C0_9CHLO	unreviewed	Uncharacterized protein	MNEG_1373	Monoraphidium neglectum							25731221
A0A0D2MVM9	A0A0D2MVM9_9CHLO	unreviewed	Uncharacterized protein	MNEG_1374	Monoraphidium neglectum							25731232
A0A0D2NQG8	A0A0D2NQG8_9CHLO	unreviewed	THO complex subunit 5	MNEG_1375	Monoraphidium neglectum			catalytic activity [GO:0003824]		catalytic activity [GO:0003824]		25731243
A0A0D2N287	A0A0D2N287_9CHLO	unreviewed	Glutathione S-transferase (EC 2.5.1.18)	MNEG_1376	Monoraphidium neglectum			glutathione transferase activity [GO:0004364]		glutathione transferase activity [GO:0004364]		25731254
A0A0D2K8R1	A0A0D2K8R1_9CHLO	unreviewed	Uncharacterized protein	MNEG_1377	Monoraphidium neglectum							25731265
A0A0D2LJJ3	A0A0D2LJJ3_9CHLO	unreviewed	Acetyl-coenzyme A synthetase (EC 6.2.1.1)	MNEG_1378	Monoraphidium neglectum		CATALYTIC ACTIVITY: ATP + acetate + CoA = AMP + diphosphate + acetyl-CoA. {ECO:0000256|RuleBase:RU361147}.	acetate-CoA ligase activity [GO:0003987]; AMP binding [GO:0016208]; ATP binding [GO:0005524]; acetyl-CoA biosynthetic process from acetate [GO:0019427]	acetyl-CoA biosynthetic process from acetate [GO:0019427]	acetate-CoA ligase activity [GO:0003987]; AMP binding [GO:0016208]; ATP binding [GO:0005524]		25731276
A0A0D2MVN6	A0A0D2MVN6_9CHLO	unreviewed	Alpha-1,2-mannosyltransferase (EC 2.4.1.-)	MNEG_1379	Monoraphidium neglectum			transferase activity, transferring glycosyl groups [GO:0016757]		transferase activity, transferring glycosyl groups [GO:0016757]		25731287
A0A0D2NQH3	A0A0D2NQH3_9CHLO	unreviewed	Uncharacterized protein	MNEG_1380	Monoraphidium neglectum							25731298
A0A0D2N299	A0A0D2N299_9CHLO	unreviewed	Cytochrome c oxidase subunit XI assembly protein	MNEG_1381	Monoraphidium neglectum			integral component of membrane [GO:0016021]; copper ion binding [GO:0005507]		copper ion binding [GO:0005507]	integral component of membrane [GO:0016021]	25731309
A0A0D2K8R7	A0A0D2K8R7_9CHLO	unreviewed	Uncharacterized protein (Fragment)	MNEG_1382	Monoraphidium neglectum			hydrolase activity [GO:0016787]		hydrolase activity [GO:0016787]		25731320
A0A0D2MVL5	A0A0D2MVL5_9CHLO	unreviewed	Uncharacterized protein	MNEG_1383	Monoraphidium neglectum			GTP binding [GO:0005525]; GTPase activity [GO:0003924]		GTPase activity [GO:0003924]; GTP binding [GO:0005525]		25731331
A0A0D2NQF5	A0A0D2NQF5_9CHLO	unreviewed	Uncharacterized protein	MNEG_1384	Monoraphidium neglectum							25731342
A0A0D2N267	A0A0D2N267_9CHLO	unreviewed	Alpha/beta hydrolase fold protein (EC 3.3.2.9)	MNEG_1385	Monoraphidium neglectum			cis-stilbene-oxide hydrolase activity [GO:0033961]		cis-stilbene-oxide hydrolase activity [GO:0033961]		25731353
A0A0D2K8P3	A0A0D2K8P3_9CHLO	unreviewed	Gamma-glutamyl hydrolase (EC 3.4.19.9)	MNEG_1386	Monoraphidium neglectum			gamma-glutamyl-peptidase activity [GO:0034722]; glutamine metabolic process [GO:0006541]	glutamine metabolic process [GO:0006541]	gamma-glutamyl-peptidase activity [GO:0034722]		25731364
A0A0D2LJI0	A0A0D2LJI0_9CHLO	unreviewed	Bromodomain and WD repeat domain containing 1 (EC 2.3.1.48)	MNEG_1387	Monoraphidium neglectum			nucleus [GO:0005634]; histone acetyltransferase activity [GO:0004402]; regulation of transcription, DNA-templated [GO:0006355]	regulation of transcription, DNA-templated [GO:0006355]	histone acetyltransferase activity [GO:0004402]	nucleus [GO:0005634]	25731375
A0A0D2MVM1	A0A0D2MVM1_9CHLO	unreviewed	Uncharacterized protein	MNEG_1388	Monoraphidium neglectum							25731386
A0A0D2NQG3	A0A0D2NQG3_9CHLO	unreviewed	Transcription factor Dp-1	MNEG_1389	Monoraphidium neglectum			nucleus [GO:0005634]; transcription factor complex [GO:0005667]; DNA binding [GO:0003677]; transcription factor activity, sequence-specific DNA binding [GO:0003700]; cell cycle [GO:0007049]; transcription, DNA-templated [GO:0006351]	cell cycle [GO:0007049]; transcription, DNA-templated [GO:0006351]	DNA binding [GO:0003677]; transcription factor activity, sequence-specific DNA binding [GO:0003700]	nucleus [GO:0005634]; transcription factor complex [GO:0005667]	25731397
A0A0D2N277	A0A0D2N277_9CHLO	unreviewed	Uncharacterized protein	MNEG_1390	Monoraphidium neglectum							25731408
A0A0D2K8Q0	A0A0D2K8Q0_9CHLO	unreviewed	Uncharacterized protein	MNEG_1391	Monoraphidium neglectum			ATP binding [GO:0005524]; protein serine/threonine kinase activity [GO:0004674]		ATP binding [GO:0005524]; protein serine/threonine kinase activity [GO:0004674]		25731419
A0A0D2LJI7	A0A0D2LJI7_9CHLO	unreviewed	Uncharacterized protein (Fragment)	MNEG_1392	Monoraphidium neglectum							25731430
A0A0D2MVK0	A0A0D2MVK0_9CHLO	unreviewed	Threonyl-tRNA synthetase (EC 6.1.1.3)	MNEG_1393	Monoraphidium neglectum			cytoplasm [GO:0005737]; ATP binding [GO:0005524]; threonine-tRNA ligase activity [GO:0004829]; threonyl-tRNA aminoacylation [GO:0006435]	threonyl-tRNA aminoacylation [GO:0006435]	ATP binding [GO:0005524]; threonine-tRNA ligase activity [GO:0004829]	cytoplasm [GO:0005737]	25731441
A0A0D2NQE2	A0A0D2NQE2_9CHLO	unreviewed	Fructose-bisphosphate aldolase, class I (EC 4.1.2.13)	MNEG_1394	Monoraphidium neglectum			fructose-bisphosphate aldolase activity [GO:0004332]; glycolytic process [GO:0006096]	glycolytic process [GO:0006096]	fructose-bisphosphate aldolase activity [GO:0004332]		25731452
A0A0D2N251	A0A0D2N251_9CHLO	unreviewed	Uncharacterized protein	MNEG_1395	Monoraphidium neglectum							25731463
A0A0D2K8N3	A0A0D2K8N3_9CHLO	unreviewed	26S proteasome non-ATPase regulatory subunit 1	MNEG_1396	Monoraphidium neglectum			proteasome complex [GO:0000502]; enzyme regulator activity [GO:0030234]; regulation of protein catabolic process [GO:0042176]	regulation of protein catabolic process [GO:0042176]	enzyme regulator activity [GO:0030234]	proteasome complex [GO:0000502]	25731474
A0A0D2LJG9	A0A0D2LJG9_9CHLO	unreviewed	Potassium voltage-gated channel subfamily Hmember 2	MNEG_1397	Monoraphidium neglectum			integral component of membrane [GO:0016021]; voltage-gated potassium channel activity [GO:0005249]		voltage-gated potassium channel activity [GO:0005249]	integral component of membrane [GO:0016021]	25731485
A0A0D2MVK7	A0A0D2MVK7_9CHLO	unreviewed	Dolichol-phosphate mannosyltransferase (EC 2.4.1.83)	MNEG_1398	Monoraphidium neglectum			dolichyl-phosphate beta-D-mannosyltransferase activity [GO:0004582]		dolichyl-phosphate beta-D-mannosyltransferase activity [GO:0004582]		25731496
A0A0D2NQF0	A0A0D2NQF0_9CHLO	unreviewed	Uncharacterized protein	MNEG_1399	Monoraphidium neglectum							25731507
A0A0D2N259	A0A0D2N259_9CHLO	unreviewed	Uncharacterized protein	MNEG_1400	Monoraphidium neglectum							25731518
A0A0D2K8N5	A0A0D2K8N5_9CHLO	unreviewed	Uncharacterized protein	MNEG_1401	Monoraphidium neglectum			ribosome [GO:0005840]; rRNA binding [GO:0019843]; structural constituent of ribosome [GO:0003735]; translation [GO:0006412]	translation [GO:0006412]	rRNA binding [GO:0019843]; structural constituent of ribosome [GO:0003735]	ribosome [GO:0005840]	25731529
A0A0D2LJH5	A0A0D2LJH5_9CHLO	unreviewed	Uncharacterized protein	MNEG_1402	Monoraphidium neglectum							25731540
A0A0D2LJF0	A0A0D2LJF0_9CHLO	unreviewed	Putative Structural maintenance of chromosomes protein 4	MNEG_1403	Monoraphidium neglectum			chromosome [GO:0005694]; ATP binding [GO:0005524]; chromosome organization [GO:0051276]	chromosome organization [GO:0051276]	ATP binding [GO:0005524]	chromosome [GO:0005694]	25731551
A0A0D2MVJ3	A0A0D2MVJ3_9CHLO	unreviewed	Uncharacterized protein	MNEG_1404	Monoraphidium neglectum							25731562
A0A0D2NQD9	A0A0D2NQD9_9CHLO	unreviewed	Uncharacterized protein	MNEG_1405	Monoraphidium neglectum			fatty-acyl-CoA binding [GO:0000062]		fatty-acyl-CoA binding [GO:0000062]		25731573
A0A0D2N243	A0A0D2N243_9CHLO	unreviewed	Uncharacterized protein	MNEG_1406	Monoraphidium neglectum			copper ion binding [GO:0005507]; oxidoreductase activity [GO:0016491]		copper ion binding [GO:0005507]; oxidoreductase activity [GO:0016491]		25731584
A0A0D2K8M8	A0A0D2K8M8_9CHLO	unreviewed	Uncharacterized protein	MNEG_1407	Monoraphidium neglectum							25731595
A0A0D2LJG1	A0A0D2LJG1_9CHLO	unreviewed	Uncharacterized protein	MNEG_1408	Monoraphidium neglectum							25731606
A0A0D2NQC7	A0A0D2NQC7_9CHLO	unreviewed	ATPase, P-type (Transporting), HAD superfamily, subfamily IC (EC 3.6.3.8) (Fragment)	MNEG_1409	Monoraphidium neglectum			integral component of membrane [GO:0016021]; calcium-transporting ATPase activity [GO:0005388]; nucleotide binding [GO:0000166]		calcium-transporting ATPase activity [GO:0005388]; nucleotide binding [GO:0000166]	integral component of membrane [GO:0016021]	25731617
A0A0D2N228	A0A0D2N228_9CHLO	unreviewed	Uncharacterized protein	MNEG_1410	Monoraphidium neglectum							25731628
A0A0D2K8L6	A0A0D2K8L6_9CHLO	unreviewed	Putative peptidoglycan binding protein	MNEG_1411	Monoraphidium neglectum							25731639
A0A0D2LJE3	A0A0D2LJE3_9CHLO	unreviewed	Uncharacterized protein	MNEG_1412	Monoraphidium neglectum							25731650
A0A0D2MVI7	A0A0D2MVI7_9CHLO	unreviewed	Uncharacterized protein	MNEG_1413	Monoraphidium neglectum							25731661
A0A0D2NQD2	A0A0D2NQD2_9CHLO	unreviewed	Uncharacterized protein	MNEG_1414	Monoraphidium neglectum			integral component of membrane [GO:0016021]; mitochondrial fission [GO:0000266]	mitochondrial fission [GO:0000266]		integral component of membrane [GO:0016021]	25731672
A0A0D2N236	A0A0D2N236_9CHLO	unreviewed	Sentrin-specific protease 1 (EC 3.4.22.-)	MNEG_1415	Monoraphidium neglectum			cysteine-type peptidase activity [GO:0008234]		cysteine-type peptidase activity [GO:0008234]		25731683
A0A0D2K8M3	A0A0D2K8M3_9CHLO	unreviewed	Histone-binding protein RBBP4 (EC 2.3.1.48)	MNEG_1416	Monoraphidium neglectum			histone acetyltransferase activity [GO:0004402]		histone acetyltransferase activity [GO:0004402]		25731694
A0A0D2LJC7	A0A0D2LJC7_9CHLO	unreviewed	Uncharacterized protein (Fragment)	MNEG_1417	Monoraphidium neglectum			integral component of membrane [GO:0016021]			integral component of membrane [GO:0016021]	25731705
A0A0D2MVH3	A0A0D2MVH3_9CHLO	unreviewed	Triacylglycerol lipase-like protein	MNEG_1418	Monoraphidium neglectum			hydrolase activity [GO:0016787]; lipid metabolic process [GO:0006629]	lipid metabolic process [GO:0006629]	hydrolase activity [GO:0016787]		25731716
A0A0D2NQC0	A0A0D2NQC0_9CHLO	unreviewed	Uncharacterized protein	MNEG_1419	Monoraphidium neglectum							25731727
A0A0D2N219	A0A0D2N219_9CHLO	unreviewed	Uncharacterized protein	MNEG_1420	Monoraphidium neglectum							25731738
A0A0D2K8L0	A0A0D2K8L0_9CHLO	unreviewed	Uncharacterized protein	MNEG_1421	Monoraphidium neglectum			integral component of membrane [GO:0016021]; cation transmembrane transporter activity [GO:0008324]; potassium ion transport [GO:0006813]	potassium ion transport [GO:0006813]	cation transmembrane transporter activity [GO:0008324]	integral component of membrane [GO:0016021]	25731749
A0A0D2LJD6	A0A0D2LJD6_9CHLO	unreviewed	Uncharacterized protein	MNEG_1422	Monoraphidium neglectum							25731760
A0A0D2MVI0	A0A0D2MVI0_9CHLO	unreviewed	Uncharacterized protein	MNEG_1423	Monoraphidium neglectum			integral component of membrane [GO:0016021]			integral component of membrane [GO:0016021]	25731771
A0A0D2N204	A0A0D2N204_9CHLO	unreviewed	Uncharacterized protein	MNEG_1424	Monoraphidium neglectum							25731782
A0A0D2K8J2	A0A0D2K8J2_9CHLO	unreviewed	Nucleotide binding protein, putative	MNEG_1425	Monoraphidium neglectum							25731793
A0A0D2LJB9	A0A0D2LJB9_9CHLO	unreviewed	30S ribosomal protein S20	MNEG_1426	Monoraphidium neglectum			ribosome [GO:0005840]; RNA binding [GO:0003723]; structural constituent of ribosome [GO:0003735]; translation [GO:0006412]	translation [GO:0006412]	RNA binding [GO:0003723]; structural constituent of ribosome [GO:0003735]	ribosome [GO:0005840]	25731804
A0A0D2MVG6	A0A0D2MVG6_9CHLO	unreviewed	Uncharacterized protein	MNEG_1427	Monoraphidium neglectum			transcription factor TFIID complex [GO:0005669]; DNA-templated transcription, initiation [GO:0006352]	DNA-templated transcription, initiation [GO:0006352]		transcription factor TFIID complex [GO:0005669]	25731815
A0A0D2NQB3	A0A0D2NQB3_9CHLO	unreviewed	CCR4-NOT complex subunit CAF16 (EC 3.6.3.28)	MNEG_1428	Monoraphidium neglectum			ATP binding [GO:0005524]; ATPase-coupled organic phosphonate transmembrane transporter activity [GO:0015416]		ATPase-coupled organic phosphonate transmembrane transporter activity [GO:0015416]; ATP binding [GO:0005524]		25731826
A0A0D2N211	A0A0D2N211_9CHLO	unreviewed	Subtilisin-like protease (EC 3.4.21.-)	MNEG_1429	Monoraphidium neglectum			serine-type endopeptidase activity [GO:0004252]		serine-type endopeptidase activity [GO:0004252]		25731837
A0A0D2K8K2	A0A0D2K8K2_9CHLO	unreviewed	Uncharacterized protein	MNEG_1430	Monoraphidium neglectum			nucleus [GO:0005634]			nucleus [GO:0005634]	25731848
A0A0D2N1Z7	A0A0D2N1Z7_9CHLO	unreviewed	Nuclear pore protein	MNEG_1431	Monoraphidium neglectum			membrane [GO:0016020]; nuclear pore [GO:0005643]; mRNA transport [GO:0051028]; protein transport [GO:0015031]	mRNA transport [GO:0051028]; protein transport [GO:0015031]		membrane [GO:0016020]; nuclear pore [GO:0005643]	25731859
A0A0D2K8I5	A0A0D2K8I5_9CHLO	unreviewed	DNA replication licensing factor MCM8	MNEG_1432	Monoraphidium neglectum			ATP binding [GO:0005524]; DNA binding [GO:0003677]; DNA replication initiation [GO:0006270]	DNA replication initiation [GO:0006270]	ATP binding [GO:0005524]; DNA binding [GO:0003677]		25731870
A0A0D2LJA5	A0A0D2LJA5_9CHLO	unreviewed	Uncharacterized protein	MNEG_1433	Monoraphidium neglectum							25731881
A0A0D2MVG1	A0A0D2MVG1_9CHLO	unreviewed	Uncharacterized protein	MNEG_1434	Monoraphidium neglectum							25731892
A0A0D2NQA4	A0A0D2NQA4_9CHLO	unreviewed	Uncharacterized protein	MNEG_1435	Monoraphidium neglectum							25731903
A0A0D2N1X8	A0A0D2N1X8_9CHLO	unreviewed	Uncharacterized protein (Fragment)	MNEG_1436	Monoraphidium neglectum							25731914
A0A0D2K8G5	A0A0D2K8G5_9CHLO	unreviewed	OTU domain-containing protein 3	MNEG_1437	Monoraphidium neglectum							25731925
A0A0D2LJ90	A0A0D2LJ90_9CHLO	unreviewed	Uncharacterized protein	MNEG_1438	Monoraphidium neglectum			integral component of membrane [GO:0016021]			integral component of membrane [GO:0016021]	25731936
A0A0D2MVE9	A0A0D2MVE9_9CHLO	unreviewed	Uncharacterized protein	MNEG_1439	Monoraphidium neglectum			integral component of membrane [GO:0016021]			integral component of membrane [GO:0016021]	25731947
A0A0D2NQ88	A0A0D2NQ88_9CHLO	unreviewed	Cysteine synthase (EC 2.5.1.47)	MNEG_1440	Monoraphidium neglectum		CATALYTIC ACTIVITY: O-acetyl-L-serine + hydrogen sulfide = L-cysteine + acetate. {ECO:0000256|RuleBase:RU003985}.	cysteine synthase activity [GO:0004124]; transferase activity [GO:0016740]; cysteine biosynthetic process from serine [GO:0006535]	cysteine biosynthetic process from serine [GO:0006535]	cysteine synthase activity [GO:0004124]; transferase activity [GO:0016740]		25731958
A0A0D2N1Y8	A0A0D2N1Y8_9CHLO	unreviewed	NudC domain-containing protein 2	MNEG_1441	Monoraphidium neglectum							25731969
A0A0D2K8H5	A0A0D2K8H5_9CHLO	unreviewed	40S ribosomal protein S26	MNEG_1442	Monoraphidium neglectum			ribosome [GO:0005840]; structural constituent of ribosome [GO:0003735]; translation [GO:0006412]	translation [GO:0006412]	structural constituent of ribosome [GO:0003735]	ribosome [GO:0005840]	25731980
A0A0D2LJ97	A0A0D2LJ97_9CHLO	unreviewed	Uncharacterized protein	MNEG_1443	Monoraphidium neglectum			calcium ion binding [GO:0005509]		calcium ion binding [GO:0005509]		25731991
A0A0D2MVF6	A0A0D2MVF6_9CHLO	unreviewed	Uncharacterized protein	MNEG_1444	Monoraphidium neglectum							25732002
A0A0D2NQ96	A0A0D2NQ96_9CHLO	unreviewed	Uncharacterized protein (Fragment)	MNEG_1445	Monoraphidium neglectum							25732013
A0A0D2LJ79	A0A0D2LJ79_9CHLO	unreviewed	ATP synthase subunit beta (EC 3.6.3.14)	MNEG_1446	Monoraphidium neglectum		CATALYTIC ACTIVITY: ATP + H(2)O + H(+)(In) = ADP + phosphate + H(+)(Out). {ECO:0000256|RuleBase:RU003553}.	proton-transporting ATP synthase complex, catalytic core F(1) [GO:0045261]; ATP binding [GO:0005524]; proton-transporting ATP synthase activity, rotational mechanism [GO:0046933]; ATP synthesis coupled proton transport [GO:0015986]	ATP synthesis coupled proton transport [GO:0015986]	ATP binding [GO:0005524]; proton-transporting ATP synthase activity, rotational mechanism [GO:0046933]	proton-transporting ATP synthase complex, catalytic core F(1) [GO:0045261]	25732024
A0A0D2MVD7	A0A0D2MVD7_9CHLO	unreviewed	Uncharacterized protein	MNEG_1447	Monoraphidium neglectum			integral component of membrane [GO:0016021]			integral component of membrane [GO:0016021]	25732035
A0A0D2NQ74	A0A0D2NQ74_9CHLO	unreviewed	Eukaryotic translation initiation factor 4G	MNEG_1448	Monoraphidium neglectum			translation initiation factor activity [GO:0003743]		translation initiation factor activity [GO:0003743]		25732046
A0A0D2N1X3	A0A0D2N1X3_9CHLO	unreviewed	Eukaryotic translation initiation factor 3 subunit L (eIF3l)	MNEG_1449	Monoraphidium neglectum			eukaryotic 43S preinitiation complex [GO:0016282]; eukaryotic 48S preinitiation complex [GO:0033290]; eukaryotic translation initiation factor 3 complex [GO:0005852]; translation initiation factor activity [GO:0003743]; formation of translation preinitiation complex [GO:0001731]; regulation of translational initiation [GO:0006446]	formation of translation preinitiation complex [GO:0001731]; regulation of translational initiation [GO:0006446]	translation initiation factor activity [GO:0003743]	eukaryotic 43S preinitiation complex [GO:0016282]; eukaryotic 48S preinitiation complex [GO:0033290]; eukaryotic translation initiation factor 3 complex [GO:0005852]	25732057
A0A0D2K8F8	A0A0D2K8F8_9CHLO	unreviewed	Glycogen operon protein GlgX (EC 3.2.1.-)	MNEG_1450	Monoraphidium neglectum			hydrolase activity, hydrolyzing O-glycosyl compounds [GO:0004553]; carbohydrate metabolic process [GO:0005975]	carbohydrate metabolic process [GO:0005975]	hydrolase activity, hydrolyzing O-glycosyl compounds [GO:0004553]		25732068
A0A0D2LJ84	A0A0D2LJ84_9CHLO	unreviewed	Uncharacterized protein	MNEG_1451	Monoraphidium neglectum							25732079
A0A0D2MVE3	A0A0D2MVE3_9CHLO	unreviewed	Uncharacterized protein	MNEG_1452	Monoraphidium neglectum			nucleolus [GO:0005730]; ribosome biogenesis [GO:0042254]	ribosome biogenesis [GO:0042254]		nucleolus [GO:0005730]	25732090
A0A0D2NQ82	A0A0D2NQ82_9CHLO	unreviewed	26S proteasome regulatory subunit T4 (EC 3.6.4.3)	MNEG_1453	Monoraphidium neglectum			cytoplasm [GO:0005737]; proteasome complex [GO:0000502]; ATP binding [GO:0005524]; microtubule-severing ATPase activity [GO:0008568]; protein catabolic process [GO:0030163]	protein catabolic process [GO:0030163]	ATP binding [GO:0005524]; microtubule-severing ATPase activity [GO:0008568]	cytoplasm [GO:0005737]; proteasome complex [GO:0000502]	25732101
A0A0D2MVC6	A0A0D2MVC6_9CHLO	unreviewed	Uncharacterized protein	MNEG_1454	Monoraphidium neglectum							25732112
A0A0D2NQ59	A0A0D2NQ59_9CHLO	unreviewed	Uncharacterized protein	MNEG_1455	Monoraphidium neglectum							25732123
A0A0D2N1W3	A0A0D2N1W3_9CHLO	unreviewed	Leucine rich repeat containing 6 (EC 3.1.1.3)	MNEG_1456	Monoraphidium neglectum			triglyceride lipase activity [GO:0004806]		triglyceride lipase activity [GO:0004806]		25732134
A0A0D2K8E7	A0A0D2K8E7_9CHLO	unreviewed	Uncharacterized protein	MNEG_1457	Monoraphidium neglectum							25732145
A0A0D2LJ71	A0A0D2LJ71_9CHLO	unreviewed	Uncharacterized protein	MNEG_1458	Monoraphidium neglectum							25732156
A0A0D2MVD1	A0A0D2MVD1_9CHLO	unreviewed	Uncharacterized protein	MNEG_1459	Monoraphidium neglectum			integral component of membrane [GO:0016021]			integral component of membrane [GO:0016021]	25732167
A0A0D2NQ66	A0A0D2NQ66_9CHLO	unreviewed	Uncharacterized protein	MNEG_1460	Monoraphidium neglectum			nuclear chromosome [GO:0000228]; chromatin remodeling [GO:0006338]	chromatin remodeling [GO:0006338]		nuclear chromosome [GO:0000228]	25732178
A0A0D2N1W7	A0A0D2N1W7_9CHLO	unreviewed	Uncharacterized protein	MNEG_1461	Monoraphidium neglectum							25732189
A0A0D2K8F2	A0A0D2K8F2_9CHLO	unreviewed	ATP-dependent protease ATP-binding subunit HslU	MNEG_1462	Monoraphidium neglectum			HslUV protease complex [GO:0009376]; ATP binding [GO:0005524]; ATPase activity [GO:0016887]; peptidase activity, acting on L-amino acid peptides [GO:0070011]		ATPase activity [GO:0016887]; ATP binding [GO:0005524]; peptidase activity, acting on L-amino acid peptides [GO:0070011]	HslUV protease complex [GO:0009376]	25732200
A0A0D2N1U9	A0A0D2N1U9_9CHLO	unreviewed	V-type proton ATPase subunit C	MNEG_1463	Monoraphidium neglectum			proton-transporting V-type ATPase, V1 domain [GO:0033180]; hydrogen ion transmembrane transporter activity [GO:0015078]; ATP hydrolysis coupled proton transport [GO:0015991]	ATP hydrolysis coupled proton transport [GO:0015991]	hydrogen ion transmembrane transporter activity [GO:0015078]	proton-transporting V-type ATPase, V1 domain [GO:0033180]	25732211
A0A0D2K8D4	A0A0D2K8D4_9CHLO	unreviewed	Uncharacterized protein	MNEG_1464	Monoraphidium neglectum							25732222
A0A0D2LJ57	A0A0D2LJ57_9CHLO	unreviewed	Uncharacterized protein	MNEG_1465	Monoraphidium neglectum			3'-5' exonuclease activity [GO:0008408]; nucleic acid binding [GO:0003676]		3'-5' exonuclease activity [GO:0008408]; nucleic acid binding [GO:0003676]		25732233
A0A0D2MVC0	A0A0D2MVC0_9CHLO	unreviewed	Peptidase S8/S53 subtilisin kexin sedolisin (EC 3.4.21.-)	MNEG_1466	Monoraphidium neglectum			serine-type endopeptidase activity [GO:0004252]		serine-type endopeptidase activity [GO:0004252]		25732244
A0A0D2NQ51	A0A0D2NQ51_9CHLO	unreviewed	Peptidase S8/S53 subtilisin kexin sedolisin (EC 3.4.21.-)	MNEG_1467	Monoraphidium neglectum			serine-type endopeptidase activity [GO:0004252]		serine-type endopeptidase activity [GO:0004252]		25732255
A0A0D2N1V6	A0A0D2N1V6_9CHLO	unreviewed	Uncharacterized protein	MNEG_1468	Monoraphidium neglectum							25732266
A0A0D2K8D9	A0A0D2K8D9_9CHLO	unreviewed	Uncharacterized protein	MNEG_1469	Monoraphidium neglectum							25732277
A0A0D2LJ63	A0A0D2LJ63_9CHLO	unreviewed	Uncharacterized protein	MNEG_1470	Monoraphidium neglectum							25732288
A0A0D2NQ27	A0A0D2NQ27_9CHLO	unreviewed	Uncharacterized protein (Fragment)	MNEG_1471	Monoraphidium neglectum			ATP binding [GO:0005524]; protein kinase activity [GO:0004672]		ATP binding [GO:0005524]; protein kinase activity [GO:0004672]		25732298
A0A0D2N1U0	A0A0D2N1U0_9CHLO	unreviewed	60S ribosomal protein L34	MNEG_1472	Monoraphidium neglectum			ribosome [GO:0005840]; structural constituent of ribosome [GO:0003735]; translation [GO:0006412]	translation [GO:0006412]	structural constituent of ribosome [GO:0003735]	ribosome [GO:0005840]	25732309
A0A0D2K8C0	A0A0D2K8C0_9CHLO	unreviewed	2-phytyl-1,4-beta-naphthoquinone methyltransferase, chloroplastic (EC 2.1.1.329) (Demethylphylloquinone methyltransferase) (Menaquinone biosynthesis methyltransferase ubiE-like protein)	MENG MNEG_1473	Monoraphidium neglectum		CATALYTIC ACTIVITY: S-adenosyl-L-methionine + demethylphylloquinol = S-adenosyl-L-homocysteine + phylloquinol. {ECO:0000256|HAMAP-Rule:MF_03192}.	chloroplast [GO:0009507]; 2-phytyl-1,4-naphthoquinone methyltransferase activity [GO:0052624]; phylloquinone biosynthetic process [GO:0042372]	phylloquinone biosynthetic process [GO:0042372]	2-phytyl-1,4-naphthoquinone methyltransferase activity [GO:0052624]	chloroplast [GO:0009507]	25732320
A0A0D2LJ46	A0A0D2LJ46_9CHLO	unreviewed	Uncharacterized protein	MNEG_1474	Monoraphidium neglectum							25732331
A0A0D2MVA9	A0A0D2MVA9_9CHLO	unreviewed	Uncharacterized protein	MNEG_1475	Monoraphidium neglectum							25732342
A0A0D2NQ36	A0A0D2NQ36_9CHLO	unreviewed	Uncharacterized protein	MNEG_1476	Monoraphidium neglectum							25732353
A0A0D2N1U4	A0A0D2N1U4_9CHLO	unreviewed	Uncharacterized protein	MNEG_1477	Monoraphidium neglectum							25732364
A0A0D2K8C6	A0A0D2K8C6_9CHLO	unreviewed	Uncharacterized protein	MNEG_1478	Monoraphidium neglectum							25732375
A0A0D2LJ52	A0A0D2LJ52_9CHLO	unreviewed	Uncharacterized protein	MNEG_1479	Monoraphidium neglectum							25732386
A0A0D2MVB5	A0A0D2MVB5_9CHLO	unreviewed	Uncharacterized protein	MNEG_1480	Monoraphidium neglectum							25732397
A0A0D2NQ43	A0A0D2NQ43_9CHLO	unreviewed	Uncharacterized protein	MNEG_1481	Monoraphidium neglectum							25732408
A0A0D2K8A7	A0A0D2K8A7_9CHLO	unreviewed	Putative ADP-ribosylation factor GTPase-activating protein AGD15	MNEG_1482	Monoraphidium neglectum			GTPase activator activity [GO:0005096]; iron-sulfur cluster binding [GO:0051536]; metal ion binding [GO:0046872]; structural molecule activity [GO:0005198]; protein maturation by iron-sulfur cluster transfer [GO:0097428]	protein maturation by iron-sulfur cluster transfer [GO:0097428]	GTPase activator activity [GO:0005096]; iron-sulfur cluster binding [GO:0051536]; metal ion binding [GO:0046872]; structural molecule activity [GO:0005198]		25732419
A0A0D2LJ35	A0A0D2LJ35_9CHLO	unreviewed	Charged multivesicular body protein 5	MNEG_1483	Monoraphidium neglectum			intracellular [GO:0005622]; vacuolar transport [GO:0007034]	vacuolar transport [GO:0007034]		intracellular [GO:0005622]	25732430
A0A0D2MV95	A0A0D2MV95_9CHLO	unreviewed	Uncharacterized protein	MNEG_1484	Monoraphidium neglectum			cytoplasm [GO:0005737]; mannosyl-glycoprotein endo-beta-N-acetylglucosaminidase activity [GO:0033925]		mannosyl-glycoprotein endo-beta-N-acetylglucosaminidase activity [GO:0033925]	cytoplasm [GO:0005737]	25732441
A0A0D2NQ16	A0A0D2NQ16_9CHLO	unreviewed	Zinc finger CCCH domain-containing protein 10	MNEG_1485	Monoraphidium neglectum							25732452
A0A0D2N1T4	A0A0D2N1T4_9CHLO	unreviewed	Glutamyl-tRNA(Gln) amidotransferase subunit D	MNEG_1486	Monoraphidium neglectum			asparaginase activity [GO:0004067]; transferase activity [GO:0016740]		asparaginase activity [GO:0004067]; transferase activity [GO:0016740]		25732463
A0A0D2K8B4	A0A0D2K8B4_9CHLO	unreviewed	Uncharacterized protein	MNEG_1487	Monoraphidium neglectum			integral component of membrane [GO:0016021]			integral component of membrane [GO:0016021]	25732474
A0A0D2LJ41	A0A0D2LJ41_9CHLO	unreviewed	SNF1-related protein kinase regulatory subunit beta-2	MNEG_1488	Monoraphidium neglectum			kinase activity [GO:0016301]; cellular response to nitrogen levels [GO:0043562]; response to sucrose [GO:0009744]	cellular response to nitrogen levels [GO:0043562]; response to sucrose [GO:0009744]	kinase activity [GO:0016301]		25732485
A0A0D2MVA2	A0A0D2MVA2_9CHLO	unreviewed	THO complex subunit 4	MNEG_1489	Monoraphidium neglectum			RNA binding [GO:0003723]		RNA binding [GO:0003723]		25732496
A0A0D2NPZ9	A0A0D2NPZ9_9CHLO	unreviewed	Putative cytosol aminopeptidase (EC 3.4.11.1)	MNEG_1490	Monoraphidium neglectum			cytoplasm [GO:0005737]; aminopeptidase activity [GO:0004177]; manganese ion binding [GO:0030145]; metalloexopeptidase activity [GO:0008235]		aminopeptidase activity [GO:0004177]; manganese ion binding [GO:0030145]; metalloexopeptidase activity [GO:0008235]	cytoplasm [GO:0005737]	25732507
A0A0D2N1S1	A0A0D2N1S1_9CHLO	unreviewed	Uncharacterized protein	MNEG_1491	Monoraphidium neglectum							25732518
A0A0D2K899	A0A0D2K899_9CHLO	unreviewed	RNA-dependent RNA polymerase (EC 2.7.7.48)	MNEG_1492	Monoraphidium neglectum		CATALYTIC ACTIVITY: Nucleoside triphosphate + RNA(n) = diphosphate + RNA(n+1). {ECO:0000256|RuleBase:RU363098}.	aminoacyl-tRNA ligase activity [GO:0004812]; ATP binding [GO:0005524]; RNA binding [GO:0003723]; RNA-directed 5'-3' RNA polymerase activity [GO:0003968]; gene silencing by RNA [GO:0031047]; tRNA aminoacylation for protein translation [GO:0006418]	gene silencing by RNA [GO:0031047]; tRNA aminoacylation for protein translation [GO:0006418]	aminoacyl-tRNA ligase activity [GO:0004812]; ATP binding [GO:0005524]; RNA binding [GO:0003723]; RNA-directed 5'-3' RNA polymerase activity [GO:0003968]		25732529
A0A0D2LJ29	A0A0D2LJ29_9CHLO	unreviewed	Uncharacterized protein	MNEG_1493	Monoraphidium neglectum							25732540
A0A0D2MV91	A0A0D2MV91_9CHLO	unreviewed	Uncharacterized protein	MNEG_1494	Monoraphidium neglectum							25732551
A0A0D2NQ07	A0A0D2NQ07_9CHLO	unreviewed	Uncharacterized protein	MNEG_1495	Monoraphidium neglectum							25732562
A0A0D2N1S9	A0A0D2N1S9_9CHLO	unreviewed	Thioredoxin	MNEG_1496	Monoraphidium neglectum			cell [GO:0005623]; protein disulfide oxidoreductase activity [GO:0015035]; cell redox homeostasis [GO:0045454]; glycerol ether metabolic process [GO:0006662]	cell redox homeostasis [GO:0045454]; glycerol ether metabolic process [GO:0006662]	protein disulfide oxidoreductase activity [GO:0015035]	cell [GO:0005623]	25732573
A0A0D2NPZ2	A0A0D2NPZ2_9CHLO	unreviewed	C1, subunit of the circadian RNA-binding protein	MNEG_1497	Monoraphidium neglectum			RNA binding [GO:0003723]		RNA binding [GO:0003723]		25732584
A0A0D2N1R6	A0A0D2N1R6_9CHLO	unreviewed	Uncharacterized protein	MNEG_1498	Monoraphidium neglectum							25732595
A0A0D2K894	A0A0D2K894_9CHLO	unreviewed	ATP-binding cassette, subfamily D (ALD), member 3 (EC 3.6.3.44)	MNEG_1499	Monoraphidium neglectum			integral component of membrane [GO:0016021]; ATP binding [GO:0005524]; xenobiotic-transporting ATPase activity [GO:0008559]		ATP binding [GO:0005524]; xenobiotic-transporting ATPase activity [GO:0008559]	integral component of membrane [GO:0016021]	25732606
A0A0D2LJ23	A0A0D2LJ23_9CHLO	unreviewed	Uncharacterized protein	MNEG_1500	Monoraphidium neglectum			integral component of membrane [GO:0016021]			integral component of membrane [GO:0016021]	25732617
A0A0D2MV87	A0A0D2MV87_9CHLO	unreviewed	Uncharacterized protein	MNEG_1501	Monoraphidium neglectum							25732628
A0A0D2N1Q2	A0A0D2N1Q2_9CHLO	unreviewed	Peptide alpha-N-acetyltransferase (EC 2.3.1.88)	MNEG_1502	Monoraphidium neglectum			peptide alpha-N-acetyltransferase activity [GO:0004596]		peptide alpha-N-acetyltransferase activity [GO:0004596]		25732639
A0A0D2K885	A0A0D2K885_9CHLO	unreviewed	Glycerophosphoryl diesterphosphodiesterase (EC 3.1.4.46)	MNEG_1503	Monoraphidium neglectum			glycerophosphodiester phosphodiesterase activity [GO:0008889]; lipid metabolic process [GO:0006629]	lipid metabolic process [GO:0006629]	glycerophosphodiester phosphodiesterase activity [GO:0008889]		25732650
A0A0D2LJ11	A0A0D2LJ11_9CHLO	unreviewed	Uncharacterized protein	MNEG_1504	Monoraphidium neglectum			integral component of membrane [GO:0016021]			integral component of membrane [GO:0016021]	25732661
A0A0D2MV79	A0A0D2MV79_9CHLO	unreviewed	Asparaginyl-tRNA synthetase (EC 6.1.1.22)	MNEG_1505	Monoraphidium neglectum			asparagine-tRNA ligase activity [GO:0004816]; ATP binding [GO:0005524]; nucleic acid binding [GO:0003676]; tRNA aminoacylation for protein translation [GO:0006418]	tRNA aminoacylation for protein translation [GO:0006418]	asparagine-tRNA ligase activity [GO:0004816]; ATP binding [GO:0005524]; nucleic acid binding [GO:0003676]		25732672
A0A0D2NPY2	A0A0D2NPY2_9CHLO	unreviewed	Asparaginyl-tRNA synthetase (EC 6.1.1.22)	MNEG_1506	Monoraphidium neglectum			cytoplasm [GO:0005737]; asparagine-tRNA ligase activity [GO:0004816]; ATP binding [GO:0005524]; asparaginyl-tRNA aminoacylation [GO:0006421]	asparaginyl-tRNA aminoacylation [GO:0006421]	asparagine-tRNA ligase activity [GO:0004816]; ATP binding [GO:0005524]	cytoplasm [GO:0005737]	25732683
A0A0D2N1Q9	A0A0D2N1Q9_9CHLO	unreviewed	Uncharacterized protein	MNEG_1507	Monoraphidium neglectum							25732694
A0A0D2K890	A0A0D2K890_9CHLO	unreviewed	Uncharacterized protein	MNEG_1508	Monoraphidium neglectum							25732705
A0A0D2LJ16	A0A0D2LJ16_9CHLO	unreviewed	Uncharacterized protein	MNEG_1509	Monoraphidium neglectum							25732716
A0A0D2MV82	A0A0D2MV82_9CHLO	unreviewed	Uncharacterized protein	MNEG_1510	Monoraphidium neglectum			integral component of membrane [GO:0016021]			integral component of membrane [GO:0016021]	25732727
A0A0D2K874	A0A0D2K874_9CHLO	unreviewed	Uncharacterized protein	MNEG_1511	Monoraphidium neglectum							25732738
A0A0D2LIZ8	A0A0D2LIZ8_9CHLO	unreviewed	50S ribosomal protein L15	MNEG_1512	Monoraphidium neglectum			large ribosomal subunit [GO:0015934]; structural constituent of ribosome [GO:0003735]; translation [GO:0006412]	translation [GO:0006412]	structural constituent of ribosome [GO:0003735]	large ribosomal subunit [GO:0015934]	25732749
A0A0D2MV72	A0A0D2MV72_9CHLO	unreviewed	60S ribosomal protein L6	MNEG_1513	Monoraphidium neglectum			ribosome [GO:0005840]; structural constituent of ribosome [GO:0003735]; translation [GO:0006412]	translation [GO:0006412]	structural constituent of ribosome [GO:0003735]	ribosome [GO:0005840]	25732760
A0A0D2NPW5	A0A0D2NPW5_9CHLO	unreviewed	Ribosomal protein L6, component of cytosolic 80S ribosome and 60S large subunit	MNEG_1514	Monoraphidium neglectum			ribosome [GO:0005840]; structural constituent of ribosome [GO:0003735]; translation [GO:0006412]	translation [GO:0006412]	structural constituent of ribosome [GO:0003735]	ribosome [GO:0005840]	25732771
A0A0D2N1P5	A0A0D2N1P5_9CHLO	unreviewed	Uncharacterized protein	MNEG_1515	Monoraphidium neglectum			integral component of membrane [GO:0016021]			integral component of membrane [GO:0016021]	25732782
A0A0D2K879	A0A0D2K879_9CHLO	unreviewed	Uncharacterized protein	MNEG_1516	Monoraphidium neglectum							25732793
A0A0D2LJ05	A0A0D2LJ05_9CHLO	unreviewed	Gamma-tubulin complex component	MNEG_1517	Monoraphidium neglectum			cytoplasm [GO:0005737]; microtubule [GO:0005874]; microtubule organizing center [GO:0005815]; spindle pole [GO:0000922]; gamma-tubulin binding [GO:0043015]; microtubule nucleation [GO:0007020]	microtubule nucleation [GO:0007020]	gamma-tubulin binding [GO:0043015]	cytoplasm [GO:0005737]; microtubule [GO:0005874]; microtubule organizing center [GO:0005815]; spindle pole [GO:0000922]	25732804
A0A0D2MV76	A0A0D2MV76_9CHLO	unreviewed	Kinesin-like protein	MNEG_1518	Monoraphidium neglectum			microtubule [GO:0005874]; ATP binding [GO:0005524]; microtubule binding [GO:0008017]; microtubule motor activity [GO:0003777]; microtubule-based movement [GO:0007018]	microtubule-based movement [GO:0007018]	ATP binding [GO:0005524]; microtubule binding [GO:0008017]; microtubule motor activity [GO:0003777]	microtubule [GO:0005874]	25732815
A0A0D2NPX6	A0A0D2NPX6_9CHLO	unreviewed	Uncharacterized protein	MNEG_1519	Monoraphidium neglectum			nucleic acid binding [GO:0003676]		nucleic acid binding [GO:0003676]		25732826
A0A0D2N1M1	A0A0D2N1M1_9CHLO	unreviewed	Uncharacterized protein (Fragment)	MNEG_1520	Monoraphidium neglectum							25732837
A0A0D2K863	A0A0D2K863_9CHLO	unreviewed	Protein yippee-like protein	MNEG_1521	Monoraphidium neglectum							25732848
A0A0D2LIY8	A0A0D2LIY8_9CHLO	unreviewed	Cyanate lyase (EC 4.2.1.104)	MNEG_1522	Monoraphidium neglectum			cyanate hydratase activity [GO:0008824]; DNA binding [GO:0003677]; cyanate metabolic process [GO:0009439]	cyanate metabolic process [GO:0009439]	cyanate hydratase activity [GO:0008824]; DNA binding [GO:0003677]		25732859
A0A0D2MV62	A0A0D2MV62_9CHLO	unreviewed	Methyltransferase type 11	MNEG_1523	Monoraphidium neglectum			methyltransferase activity [GO:0008168]		methyltransferase activity [GO:0008168]		25732870
A0A0D2NPV1	A0A0D2NPV1_9CHLO	unreviewed	Uncharacterized protein	MNEG_1524	Monoraphidium neglectum							25732881
A0A0D2N1N2	A0A0D2N1N2_9CHLO	unreviewed	Uncharacterized protein	MNEG_1525	Monoraphidium neglectum							25732892
A0A0D2K869	A0A0D2K869_9CHLO	unreviewed	Uncharacterized protein	MNEG_1526	Monoraphidium neglectum							25732903
A0A0D2LIZ3	A0A0D2LIZ3_9CHLO	unreviewed	Uncharacterized protein	MNEG_1527	Monoraphidium neglectum							25732914
A0A0D2MV67	A0A0D2MV67_9CHLO	unreviewed	Uncharacterized protein	MNEG_1528	Monoraphidium neglectum							25732925
A0A0D2NPV8	A0A0D2NPV8_9CHLO	unreviewed	Flavin-containing monooxygenase (EC 1.-.-.-)	MNEG_1529	Monoraphidium neglectum			flavin adenine dinucleotide binding [GO:0050660]; N,N-dimethylaniline monooxygenase activity [GO:0004499]; NADP binding [GO:0050661]		flavin adenine dinucleotide binding [GO:0050660]; N,N-dimethylaniline monooxygenase activity [GO:0004499]; NADP binding [GO:0050661]		25732936
A0A0D2N1N9	A0A0D2N1N9_9CHLO	unreviewed	Serine incorporator 3	MNEG_1530	Monoraphidium neglectum			integral component of membrane [GO:0016021]			integral component of membrane [GO:0016021]	25732947
A0A0D2LIX6	A0A0D2LIX6_9CHLO	unreviewed	Uncharacterized protein	MNEG_1531	Monoraphidium neglectum							25732958
A0A0D2MV52	A0A0D2MV52_9CHLO	unreviewed	Uncharacterized protein	MNEG_1532	Monoraphidium neglectum							25732969
A0A0D2NPT4	A0A0D2NPT4_9CHLO	unreviewed	Arogenate dehydrogenase 2 (EC 1.3.1.78)	MNEG_1533	Monoraphidium neglectum			chloroplast [GO:0009507]; arogenate dehydrogenase (NADP+) activity [GO:0033730]; prephenate dehydrogenase (NAD+) activity [GO:0008977]; prephenate dehydrogenase (NADP+) activity [GO:0004665]; tyrosine biosynthetic process [GO:0006571]	tyrosine biosynthetic process [GO:0006571]	arogenate dehydrogenase (NADP+) activity [GO:0033730]; prephenate dehydrogenase (NAD+) activity [GO:0008977]; prephenate dehydrogenase (NADP+) activity [GO:0004665]	chloroplast [GO:0009507]	25732980
A0A0D2N1L4	A0A0D2N1L4_9CHLO	unreviewed	Uncharacterized protein	MNEG_1534	Monoraphidium neglectum							25732991
A0A0D2K858	A0A0D2K858_9CHLO	unreviewed	Uncharacterized protein	MNEG_1535	Monoraphidium neglectum							25733002
A0A0D2LIY2	A0A0D2LIY2_9CHLO	unreviewed	Uncharacterized protein	MNEG_1536	Monoraphidium neglectum							25733013
A0A0D2MV57	A0A0D2MV57_9CHLO	unreviewed	Uncharacterized protein	MNEG_1537	Monoraphidium neglectum			actin binding [GO:0003779]		actin binding [GO:0003779]		25733024
A0A0D2NPU3	A0A0D2NPU3_9CHLO	unreviewed	Uncharacterized protein	MNEG_1538	Monoraphidium neglectum							25733035
A0A0D2N1K1	A0A0D2N1K1_9CHLO	unreviewed	Uncharacterized protein	MNEG_1539	Monoraphidium neglectum			double-stranded DNA binding [GO:0003690]; regulation of transcription, DNA-templated [GO:0006355]	regulation of transcription, DNA-templated [GO:0006355]	double-stranded DNA binding [GO:0003690]		25733046
A0A0D2K849	A0A0D2K849_9CHLO	unreviewed	Uncharacterized protein	MNEG_1540	Monoraphidium neglectum							25733057
A0A0D2LIX2	A0A0D2LIX2_9CHLO	unreviewed	Uncharacterized protein	MNEG_1541	Monoraphidium neglectum							25733068
A0A0D2MV46	A0A0D2MV46_9CHLO	unreviewed	Uncharacterized protein	MNEG_1542	Monoraphidium neglectum							25733079
A0A0D2NPS5	A0A0D2NPS5_9CHLO	unreviewed	Uncharacterized protein	MNEG_1543	Monoraphidium neglectum			integral component of membrane [GO:0016021]; ion channel activity [GO:0005216]		ion channel activity [GO:0005216]	integral component of membrane [GO:0016021]	25733090
A0A0D2N1K6	A0A0D2N1K6_9CHLO	unreviewed	Peptidyl-prolyl cis-trans isomerase SDCCAG10 (EC 5.2.1.8)	MNEG_1544	Monoraphidium neglectum		CATALYTIC ACTIVITY: Peptidylproline (omega=180) = peptidylproline (omega=0). {ECO:0000256|SAAS:SAAS00339244}.	peptidyl-prolyl cis-trans isomerase activity [GO:0003755]; protein folding [GO:0006457]	protein folding [GO:0006457]	peptidyl-prolyl cis-trans isomerase activity [GO:0003755]		25733101
A0A0D2K852	A0A0D2K852_9CHLO	unreviewed	Kinesin-like protein FLA10	MNEG_1545	Monoraphidium neglectum			cell [GO:0005623]; ATP binding [GO:0005524]; kinetochore binding [GO:0043515]; microtubule binding [GO:0008017]; microtubule motor activity [GO:0003777]; attachment of mitotic spindle microtubules to kinetochore [GO:0051315]; microtubule-based movement [GO:0007018]	attachment of mitotic spindle microtubules to kinetochore [GO:0051315]; microtubule-based movement [GO:0007018]	ATP binding [GO:0005524]; kinetochore binding [GO:0043515]; microtubule binding [GO:0008017]; microtubule motor activity [GO:0003777]	cell [GO:0005623]	25733112
A0A0D2MV36	A0A0D2MV36_9CHLO	unreviewed	Uncharacterized protein	MNEG_1546	Monoraphidium neglectum			reciprocal meiotic recombination [GO:0007131]	reciprocal meiotic recombination [GO:0007131]			25733123
A0A0D2NPQ8	A0A0D2NPQ8_9CHLO	unreviewed	Putative serine/threonine-protein kinase pats1	MNEG_1547	Monoraphidium neglectum			ATP binding [GO:0005524]; protein kinase activity [GO:0004672]		ATP binding [GO:0005524]; protein kinase activity [GO:0004672]		25733134
A0A0D2N1J4	A0A0D2N1J4_9CHLO	unreviewed	Uncharacterized protein	MNEG_1548	Monoraphidium neglectum							25733145
A0A0D2K844	A0A0D2K844_9CHLO	unreviewed	Uncharacterized protein	MNEG_1549	Monoraphidium neglectum							25733156
A0A0D2LIW6	A0A0D2LIW6_9CHLO	unreviewed	Glycerophosphoryl diesterphosphodiesterase (EC 3.1.4.46)	MNEG_1550	Monoraphidium neglectum			glycerophosphodiester phosphodiesterase activity [GO:0008889]; lipid metabolic process [GO:0006629]	lipid metabolic process [GO:0006629]	glycerophosphodiester phosphodiesterase activity [GO:0008889]		25733167
A0A0D2MV42	A0A0D2MV42_9CHLO	unreviewed	Uncharacterized protein	MNEG_1551	Monoraphidium neglectum			pseudouridine synthase activity [GO:0009982]; RNA binding [GO:0003723]; pseudouridine synthesis [GO:0001522]	pseudouridine synthesis [GO:0001522]	pseudouridine synthase activity [GO:0009982]; RNA binding [GO:0003723]		25733178
A0A0D2NPR6	A0A0D2NPR6_9CHLO	unreviewed	Putative Pseudouridylate synthase 7	MNEG_1552	Monoraphidium neglectum			integral component of membrane [GO:0016021]; pseudouridine synthase activity [GO:0009982]; RNA binding [GO:0003723]; pseudouridine synthesis [GO:0001522]	pseudouridine synthesis [GO:0001522]	pseudouridine synthase activity [GO:0009982]; RNA binding [GO:0003723]	integral component of membrane [GO:0016021]	25733189
A0A0D2N1I7	A0A0D2N1I7_9CHLO	unreviewed	Kinesin-4	MNEG_1553	Monoraphidium neglectum			ATP binding [GO:0005524]; microtubule binding [GO:0008017]; microtubule motor activity [GO:0003777]; microtubule-based movement [GO:0007018]	microtubule-based movement [GO:0007018]	ATP binding [GO:0005524]; microtubule binding [GO:0008017]; microtubule motor activity [GO:0003777]		25733200
A0A0D2K834	A0A0D2K834_9CHLO	unreviewed	Multiprotein-bridging factor 1a	MNEG_1554	Monoraphidium neglectum			sequence-specific DNA binding [GO:0043565]		sequence-specific DNA binding [GO:0043565]		25733211
A0A0D2LIV7	A0A0D2LIV7_9CHLO	unreviewed	DNA mismatch repair protein MSH4	MNEG_1555	Monoraphidium neglectum			ATP binding [GO:0005524]; mismatched DNA binding [GO:0030983]; mismatch repair [GO:0006298]	mismatch repair [GO:0006298]	ATP binding [GO:0005524]; mismatched DNA binding [GO:0030983]		25733222
A0A0D2MV29	A0A0D2MV29_9CHLO	unreviewed	Uncharacterized protein	MNEG_1556	Monoraphidium neglectum			integral component of membrane [GO:0016021]; double-stranded DNA binding [GO:0003690]; regulation of transcription, DNA-templated [GO:0006355]	regulation of transcription, DNA-templated [GO:0006355]	double-stranded DNA binding [GO:0003690]	integral component of membrane [GO:0016021]	25733233
A0A0D2NPQ0	A0A0D2NPQ0_9CHLO	unreviewed	Uncharacterized protein	MNEG_1557	Monoraphidium neglectum			hydrolase activity [GO:0016787]		hydrolase activity [GO:0016787]		25733244
A0A0D2N1J2	A0A0D2N1J2_9CHLO	unreviewed	Uncharacterized protein	MNEG_1558	Monoraphidium neglectum							25733255
A0A0D2K840	A0A0D2K840_9CHLO	unreviewed	Uncharacterized protein	MNEG_1559	Monoraphidium neglectum			hydrolase activity [GO:0016787]		hydrolase activity [GO:0016787]		25733266
A0A0D2LIW1	A0A0D2LIW1_9CHLO	unreviewed	Uncharacterized protein	MNEG_1560	Monoraphidium neglectum							25733277
A0A0D2NPN7	A0A0D2NPN7_9CHLO	unreviewed	Uncharacterized protein	MNEG_1561	Monoraphidium neglectum							25733288
A0A0D2N1I2	A0A0D2N1I2_9CHLO	unreviewed	EH domain-containing protein 4	MNEG_1562	Monoraphidium neglectum			calcium ion binding [GO:0005509]		calcium ion binding [GO:0005509]		25733299
A0A0D2K832	A0A0D2K832_9CHLO	unreviewed	Uncharacterized protein	MNEG_1563	Monoraphidium neglectum			integral component of membrane [GO:0016021]; metallocarboxypeptidase activity [GO:0004181]; zinc ion binding [GO:0008270]		metallocarboxypeptidase activity [GO:0004181]; zinc ion binding [GO:0008270]	integral component of membrane [GO:0016021]	25733310
A0A0D2LIV2	A0A0D2LIV2_9CHLO	unreviewed	Uncharacterized protein	MNEG_1564	Monoraphidium neglectum							25733321
A0A0D2MV24	A0A0D2MV24_9CHLO	unreviewed	Cell division protease FtsH (EC 3.4.24.-)	MNEG_1565	Monoraphidium neglectum			membrane [GO:0016020]; ATP binding [GO:0005524]; metalloendopeptidase activity [GO:0004222]; cell division [GO:0051301]	cell division [GO:0051301]	ATP binding [GO:0005524]; metalloendopeptidase activity [GO:0004222]	membrane [GO:0016020]	25733332
A0A0D2NPP5	A0A0D2NPP5_9CHLO	unreviewed	Signal recognition particle receptor subunit alpha	MNEG_1566	Monoraphidium neglectum			signal recognition particle receptor complex [GO:0005785]; GTP binding [GO:0005525]; GTPase activity [GO:0003924]; signal recognition particle binding [GO:0005047]; SRP-dependent cotranslational protein targeting to membrane [GO:0006614]	SRP-dependent cotranslational protein targeting to membrane [GO:0006614]	GTPase activity [GO:0003924]; GTP binding [GO:0005525]; signal recognition particle binding [GO:0005047]	signal recognition particle receptor complex [GO:0005785]	25733343
A0A0D2MV12	A0A0D2MV12_9CHLO	unreviewed	Uncharacterized protein (Fragment)	MNEG_1567	Monoraphidium neglectum			6-phosphofructokinase activity [GO:0003872]; ATP binding [GO:0005524]; fructose 6-phosphate metabolic process [GO:0006002]	fructose 6-phosphate metabolic process [GO:0006002]	6-phosphofructokinase activity [GO:0003872]; ATP binding [GO:0005524]		25733354
A0A0D2NPN0	A0A0D2NPN0_9CHLO	unreviewed	Uncharacterized protein	MNEG_1568	Monoraphidium neglectum			6-phosphofructokinase activity [GO:0003872]; ATP binding [GO:0005524]; fructose 6-phosphate metabolic process [GO:0006002]	fructose 6-phosphate metabolic process [GO:0006002]	6-phosphofructokinase activity [GO:0003872]; ATP binding [GO:0005524]		25733365
A0A0D2N1H5	A0A0D2N1H5_9CHLO	unreviewed	Uncharacterized protein	MNEG_1569	Monoraphidium neglectum							25733376
A0A0D2K827	A0A0D2K827_9CHLO	unreviewed	Uncharacterized protein	MNEG_1570	Monoraphidium neglectum			ATP binding [GO:0005524]; protein kinase activity [GO:0004672]		ATP binding [GO:0005524]; protein kinase activity [GO:0004672]		25733387
A0A0D2LIU7	A0A0D2LIU7_9CHLO	unreviewed	Peptidylprolyl isomerase (EC 5.2.1.8)	MNEG_1571	Monoraphidium neglectum			peptidyl-prolyl cis-trans isomerase activity [GO:0003755]		peptidyl-prolyl cis-trans isomerase activity [GO:0003755]		25733398
A0A0D2MV19	A0A0D2MV19_9CHLO	unreviewed	Uncharacterized protein	MNEG_1572	Monoraphidium neglectum							25733409
A0A0D2K818	A0A0D2K818_9CHLO	unreviewed	Uncharacterized protein (Fragment)	MNEG_1573	Monoraphidium neglectum							25733420
A0A0D2LIT5	A0A0D2LIT5_9CHLO	unreviewed	Uncharacterized protein (Fragment)	MNEG_1574	Monoraphidium neglectum							25733431
A0A0D2MV07	A0A0D2MV07_9CHLO	unreviewed	Uncharacterized protein (Fragment)	MNEG_1575	Monoraphidium neglectum							25733442
A0A0D2NPM3	A0A0D2NPM3_9CHLO	unreviewed	Uncharacterized protein	MNEG_1576	Monoraphidium neglectum							25733453
A0A0D2N1G8	A0A0D2N1G8_9CHLO	unreviewed	Anthranilate phosphoribosyltransferase (EC 2.4.2.18)	MNEG_1577	Monoraphidium neglectum			anthranilate phosphoribosyltransferase activity [GO:0004048]; metabolic process [GO:0008152]	metabolic process [GO:0008152]	anthranilate phosphoribosyltransferase activity [GO:0004048]		25733464
A0A0D2K822	A0A0D2K822_9CHLO	unreviewed	Uncharacterized protein	MNEG_1578	Monoraphidium neglectum							25733475
A0A0D2LIU0	A0A0D2LIU0_9CHLO	unreviewed	Anthranilate phosphoribosyltransferase (EC 2.4.2.18)	MNEG_1579	Monoraphidium neglectum			anthranilate phosphoribosyltransferase activity [GO:0004048]; tryptophan biosynthetic process [GO:0000162]	tryptophan biosynthetic process [GO:0000162]	anthranilate phosphoribosyltransferase activity [GO:0004048]		25733486
A0A0D2NPL7	A0A0D2NPL7_9CHLO	unreviewed	Midasin	MNEG_1580	Monoraphidium neglectum							25733497
A0A0D2N1G3	A0A0D2N1G3_9CHLO	unreviewed	Uncharacterized protein	MNEG_1581	Monoraphidium neglectum			phosphatidylinositol binding [GO:0035091]		phosphatidylinositol binding [GO:0035091]		25733508
A0A0D2NPK6	A0A0D2NPK6_9CHLO	unreviewed	Uncharacterized protein	MNEG_1588	Monoraphidium neglectum			zinc ion binding [GO:0008270]		zinc ion binding [GO:0008270]		25733584
A0A0D2N1F5	A0A0D2N1F5_9CHLO	unreviewed	Uncharacterized protein	MNEG_1589	Monoraphidium neglectum			N-acetyltransferase activity [GO:0008080]		N-acetyltransferase activity [GO:0008080]		25733595
A0A0D2K809	A0A0D2K809_9CHLO	unreviewed	Calcium/calmodulin dependent protein kinase II association-domain protein	MNEG_1590	Monoraphidium neglectum			calmodulin binding [GO:0005516]; calmodulin-dependent protein kinase activity [GO:0004683]		calmodulin binding [GO:0005516]; calmodulin-dependent protein kinase activity [GO:0004683]		25733606
A0A0D2LIS4	A0A0D2LIS4_9CHLO	unreviewed	D-aspartate oxidase (EC 1.4.3.1)	MNEG_1591	Monoraphidium neglectum			D-aspartate oxidase activity [GO:0008445]; FAD binding [GO:0071949]; D-amino acid metabolic process [GO:0046416]	D-amino acid metabolic process [GO:0046416]	D-aspartate oxidase activity [GO:0008445]; FAD binding [GO:0071949]		25733617
A0A0D2MUZ7	A0A0D2MUZ7_9CHLO	unreviewed	Uncharacterized protein	MNEG_1592	Monoraphidium neglectum							25733628
A0A0D2NPL2	A0A0D2NPL2_9CHLO	unreviewed	Uncharacterized protein	MNEG_1593	Monoraphidium neglectum			membrane [GO:0016020]; ATP binding [GO:0005524]; protein kinase activity [GO:0004672]		ATP binding [GO:0005524]; protein kinase activity [GO:0004672]	membrane [GO:0016020]	25733639
A0A0D2N1F8	A0A0D2N1F8_9CHLO	unreviewed	Uncharacterized protein	MNEG_1594	Monoraphidium neglectum							25733650
A0A0D2K814	A0A0D2K814_9CHLO	unreviewed	Uncharacterized protein	MNEG_1595	Monoraphidium neglectum							25733661
A0A0D2LIS9	A0A0D2LIS9_9CHLO	unreviewed	Uncharacterized protein	MNEG_1596	Monoraphidium neglectum			ATP binding [GO:0005524]; metal ion binding [GO:0046872]		ATP binding [GO:0005524]; metal ion binding [GO:0046872]		25733672
A0A0D2MV01	A0A0D2MV01_9CHLO	unreviewed	Uncharacterized protein	MNEG_1597	Monoraphidium neglectum							25733683
A0A0D2K7Z7	A0A0D2K7Z7_9CHLO	unreviewed	Phosphatidylinositol3,4, 5-trisphosphate-dependent Rac exchanger 2 protein	MNEG_1598	Monoraphidium neglectum			integral component of membrane [GO:0016021]; intracellular [GO:0005622]; intracellular signal transduction [GO:0035556]	intracellular signal transduction [GO:0035556]		integral component of membrane [GO:0016021]; intracellular [GO:0005622]	25733694
A0A0D2LIR5	A0A0D2LIR5_9CHLO	unreviewed	Protein DETOXIFICATION (Multidrug and toxic compound extrusion protein)	MNEG_1599	Monoraphidium neglectum			integral component of membrane [GO:0016021]; antiporter activity [GO:0015297]; drug transmembrane transporter activity [GO:0015238]		antiporter activity [GO:0015297]; drug transmembrane transporter activity [GO:0015238]	integral component of membrane [GO:0016021]	25733705
A0A0D2MUY4	A0A0D2MUY4_9CHLO	unreviewed	Uncharacterized protein	MNEG_1600	Monoraphidium neglectum			protein dimerization activity [GO:0046983]		protein dimerization activity [GO:0046983]		25733716
A0A0D2NPK1	A0A0D2NPK1_9CHLO	unreviewed	Uncharacterized protein	MNEG_1601	Monoraphidium neglectum			RNA binding [GO:0003723]		RNA binding [GO:0003723]		25733727
A0A0D2N1F1	A0A0D2N1F1_9CHLO	unreviewed	40S ribosomal protein S9-2	MNEG_1602	Monoraphidium neglectum			small ribosomal subunit [GO:0015935]; rRNA binding [GO:0019843]; structural constituent of ribosome [GO:0003735]; translation [GO:0006412]	translation [GO:0006412]	rRNA binding [GO:0019843]; structural constituent of ribosome [GO:0003735]	small ribosomal subunit [GO:0015935]	25733738
A0A0D2K802	A0A0D2K802_9CHLO	unreviewed	Uncharacterized protein	MNEG_1603	Monoraphidium neglectum			serine-type endopeptidase activity [GO:0004252]		serine-type endopeptidase activity [GO:0004252]		25733749
A0A0D2LIR9	A0A0D2LIR9_9CHLO	unreviewed	Uncharacterized protein	MNEG_1604	Monoraphidium neglectum							25733760
A0A0D2MUZ1	A0A0D2MUZ1_9CHLO	unreviewed	Uncharacterized protein (Fragment)	MNEG_1605	Monoraphidium neglectum							25733771
A0A0D2N1D5	A0A0D2N1D5_9CHLO	unreviewed	Choline/ethanolamine kinase (EC 2.7.1.32)	MNEG_1606	Monoraphidium neglectum			choline kinase activity [GO:0004103]		choline kinase activity [GO:0004103]		25733782
A0A0D2K7Y7	A0A0D2K7Y7_9CHLO	unreviewed	Uncharacterized protein	MNEG_1607	Monoraphidium neglectum							25733793
A0A0D2LIQ8	A0A0D2LIQ8_9CHLO	unreviewed	Uncharacterized protein	MNEG_1608	Monoraphidium neglectum							25733804
A0A0D2MUX3	A0A0D2MUX3_9CHLO	unreviewed	Uncharacterized protein	MNEG_1609	Monoraphidium neglectum							25733815
A0A0D2NPJ1	A0A0D2NPJ1_9CHLO	unreviewed	Uncharacterized protein	MNEG_1610	Monoraphidium neglectum							25733826
A0A0D2N1E0	A0A0D2N1E0_9CHLO	unreviewed	Uncharacterized protein	MNEG_1611	Monoraphidium neglectum			integral component of membrane [GO:0016021]			integral component of membrane [GO:0016021]	25733837
A0A0D2K7Z2	A0A0D2K7Z2_9CHLO	unreviewed	Ribosomal protein S11	MNEG_1612	Monoraphidium neglectum			ribosome [GO:0005840]; structural constituent of ribosome [GO:0003735]; translation [GO:0006412]	translation [GO:0006412]	structural constituent of ribosome [GO:0003735]	ribosome [GO:0005840]	25733848
A0A0D2LIR1	A0A0D2LIR1_9CHLO	unreviewed	Uncharacterized protein	MNEG_1613	Monoraphidium neglectum							25733859
A0A0D2MUX8	A0A0D2MUX8_9CHLO	unreviewed	40S ribosomal protein S5-1	MNEG_1614	Monoraphidium neglectum			small ribosomal subunit [GO:0015935]; structural constituent of ribosome [GO:0003735]; translation [GO:0006412]	translation [GO:0006412]	structural constituent of ribosome [GO:0003735]	small ribosomal subunit [GO:0015935]	25733870
A0A0D2NPJ5	A0A0D2NPJ5_9CHLO	unreviewed	Peptidylprolyl isomerase (EC 5.2.1.8)	MNEG_1615	Monoraphidium neglectum			peptidyl-prolyl cis-trans isomerase activity [GO:0003755]		peptidyl-prolyl cis-trans isomerase activity [GO:0003755]		25733881
A0A0D2N1E7	A0A0D2N1E7_9CHLO	unreviewed	Uncharacterized protein	MNEG_1616	Monoraphidium neglectum							25733892
A0A0D2MUW4	A0A0D2MUW4_9CHLO	unreviewed	Uncharacterized protein (Fragment)	MNEG_1617	Monoraphidium neglectum							25733903
A0A0D2NPI1	A0A0D2NPI1_9CHLO	unreviewed	Uncharacterized protein	MNEG_1618	Monoraphidium neglectum							25733914
A0A0D2N1C9	A0A0D2N1C9_9CHLO	unreviewed	Uncharacterized protein	MNEG_1619	Monoraphidium neglectum			6-phosphofructokinase activity [GO:0003872]; ATP binding [GO:0005524]; fructose 6-phosphate metabolic process [GO:0006002]	fructose 6-phosphate metabolic process [GO:0006002]	6-phosphofructokinase activity [GO:0003872]; ATP binding [GO:0005524]		25733925
A0A0D2K7Y3	A0A0D2K7Y3_9CHLO	unreviewed	Uncharacterized protein	MNEG_1620	Monoraphidium neglectum			integral component of membrane [GO:0016021]			integral component of membrane [GO:0016021]	25733936
A0A0D2LIQ4	A0A0D2LIQ4_9CHLO	unreviewed	Uncharacterized protein	MNEG_1621	Monoraphidium neglectum							25733947
A0A0D2MUW8	A0A0D2MUW8_9CHLO	unreviewed	E3 ubiquitin-protein ligase	MNEG_1622	Monoraphidium neglectum			ligase activity [GO:0016874]		ligase activity [GO:0016874]		25733957
A0A0D2NPI5	A0A0D2NPI5_9CHLO	unreviewed	Uncharacterized protein	MNEG_1623	Monoraphidium neglectum			ATP binding [GO:0005524]; protein kinase activity [GO:0004672]		ATP binding [GO:0005524]; protein kinase activity [GO:0004672]		25733968
A0A0D2NPH1	A0A0D2NPH1_9CHLO	unreviewed	Uncharacterized protein	MNEG_1624	Monoraphidium neglectum							25733979
A0A0D2N1C0	A0A0D2N1C0_9CHLO	unreviewed	Eukaryotic translation initiation factor 4E-1	MNEG_1625	Monoraphidium neglectum			cytoplasm [GO:0005737]; translation initiation factor activity [GO:0003743]		translation initiation factor activity [GO:0003743]	cytoplasm [GO:0005737]	25733990
A0A0D2K7X6	A0A0D2K7X6_9CHLO	unreviewed	Uncharacterized protein	MNEG_1626	Monoraphidium neglectum							25734001
A0A0D2LIP7	A0A0D2LIP7_9CHLO	unreviewed	Peflin	MNEG_1627	Monoraphidium neglectum			calcium ion binding [GO:0005509]		calcium ion binding [GO:0005509]		25734012
A0A0D2MUV9	A0A0D2MUV9_9CHLO	unreviewed	Uncharacterized protein	MNEG_1628	Monoraphidium neglectum							25734023
A0A0D2NPH6	A0A0D2NPH6_9CHLO	unreviewed	Putative Radial spoke head 1	MNEG_1629	Monoraphidium neglectum							25734034
A0A0D2N1C4	A0A0D2N1C4_9CHLO	unreviewed	Uncharacterized protein	MNEG_1630	Monoraphidium neglectum			ATP binding [GO:0005524]; protein kinase activity [GO:0004672]		ATP binding [GO:0005524]; protein kinase activity [GO:0004672]		25734045
A0A0D2K7Y0	A0A0D2K7Y0_9CHLO	unreviewed	Uncharacterized protein	MNEG_1631	Monoraphidium neglectum							25734056
A0A0D2LIQ0	A0A0D2LIQ0_9CHLO	unreviewed	Uncharacterized protein (Fragment)	MNEG_1632	Monoraphidium neglectum							25734067
A0A0D2MUU8	A0A0D2MUU8_9CHLO	unreviewed	Uncharacterized protein	MNEG_1633	Monoraphidium neglectum							25734078
A0A0D2NPG6	A0A0D2NPG6_9CHLO	unreviewed	Putative sodium-dependent transporter yocS	MNEG_1634	Monoraphidium neglectum			integral component of membrane [GO:0016021]			integral component of membrane [GO:0016021]	25734089
A0A0D2N1B3	A0A0D2N1B3_9CHLO	unreviewed	Glucosamine--fructose-6-phosphateaminotransferase (Isomerizing) (EC 2.6.1.16)	MNEG_1635	Monoraphidium neglectum			carbohydrate derivative binding [GO:0097367]; glutamine-fructose-6-phosphate transaminase (isomerizing) activity [GO:0004360]; carbohydrate derivative biosynthetic process [GO:1901137]	carbohydrate derivative biosynthetic process [GO:1901137]	carbohydrate derivative binding [GO:0097367]; glutamine-fructose-6-phosphate transaminase (isomerizing) activity [GO:0004360]		25734100
A0A0D2K7X2	A0A0D2K7X2_9CHLO	unreviewed	Dual specificity protein kinase shkE	MNEG_1636	Monoraphidium neglectum			ATP binding [GO:0005524]; protein kinase activity [GO:0004672]		ATP binding [GO:0005524]; protein kinase activity [GO:0004672]		25734111
A0A0D2LIP1	A0A0D2LIP1_9CHLO	unreviewed	Uncharacterized protein	MNEG_1637	Monoraphidium neglectum			integral component of membrane [GO:0016021]			integral component of membrane [GO:0016021]	25734122
A0A0D2MUV2	A0A0D2MUV2_9CHLO	unreviewed	Uncharacterized protein	MNEG_1638	Monoraphidium neglectum							25734133
A0A0D2LIN3	A0A0D2LIN3_9CHLO	unreviewed	Uncharacterized protein	MNEG_1639	Monoraphidium neglectum							25734144
A0A0D2MUU2	A0A0D2MUU2_9CHLO	unreviewed	Uncharacterized protein	MNEG_1640	Monoraphidium neglectum			integral component of membrane [GO:0016021]			integral component of membrane [GO:0016021]	25734155
A0A0D2NPG3	A0A0D2NPG3_9CHLO	unreviewed	ADP-ribose pyrophosphatase (EC 3.6.1.13)	MNEG_1641	Monoraphidium neglectum			ADP-ribose diphosphatase activity [GO:0047631]		ADP-ribose diphosphatase activity [GO:0047631]		25734166
A0A0D2N1A9	A0A0D2N1A9_9CHLO	unreviewed	Uncharacterized protein	MNEG_1642	Monoraphidium neglectum							25734177
A0A0D2K7W8	A0A0D2K7W8_9CHLO	unreviewed	Uncharacterized protein	MNEG_1643	Monoraphidium neglectum			ATP binding [GO:0005524]; protein serine/threonine kinase activity [GO:0004674]		ATP binding [GO:0005524]; protein serine/threonine kinase activity [GO:0004674]		25734188
A0A0D2LIN8	A0A0D2LIN8_9CHLO	unreviewed	Uncharacterized protein	MNEG_1644	Monoraphidium neglectum			integral component of membrane [GO:0016021]			integral component of membrane [GO:0016021]	25734199
A0A0D2K7V9	A0A0D2K7V9_9CHLO	unreviewed	ATP-dependent helicase (EC 3.6.1.-)	MNEG_1645	Monoraphidium neglectum			ATP binding [GO:0005524]; helicase activity [GO:0004386]; nucleic acid binding [GO:0003676]		ATP binding [GO:0005524]; helicase activity [GO:0004386]; nucleic acid binding [GO:0003676]		25734210
A0A0D2LIN0	A0A0D2LIN0_9CHLO	unreviewed	Gamma-glutamyl hydrolase (EC 3.4.19.9)	MNEG_1646	Monoraphidium neglectum			gamma-glutamyl-peptidase activity [GO:0034722]; glutamine metabolic process [GO:0006541]	glutamine metabolic process [GO:0006541]	gamma-glutamyl-peptidase activity [GO:0034722]		25734221
A0A0D2MUT6	A0A0D2MUT6_9CHLO	unreviewed	Uncharacterized protein	MNEG_1647	Monoraphidium neglectum							25734232
A0A0D2NPF9	A0A0D2NPF9_9CHLO	unreviewed	Uncharacterized protein	MNEG_1648	Monoraphidium neglectum							25734243
A0A0D2N1A5	A0A0D2N1A5_9CHLO	unreviewed	Uncharacterized protein	MNEG_1649	Monoraphidium neglectum							25734254
A0A0D2K7W4	A0A0D2K7W4_9CHLO	unreviewed	Uncharacterized protein (Fragment)	MNEG_1650	Monoraphidium neglectum			unfolded protein binding [GO:0051082]; protein folding [GO:0006457]	protein folding [GO:0006457]	unfolded protein binding [GO:0051082]		25734265
A0A0D2NPF3	A0A0D2NPF3_9CHLO	unreviewed	Endo-1,4-beta-xylanase (EC 3.2.1.8)	MNEG_1651	Monoraphidium neglectum			endo-1,4-beta-xylanase activity [GO:0031176]; xylan catabolic process [GO:0045493]	xylan catabolic process [GO:0045493]	endo-1,4-beta-xylanase activity [GO:0031176]		25734276
A0A0D2N198	A0A0D2N198_9CHLO	unreviewed	Uncharacterized protein	MNEG_1652	Monoraphidium neglectum							25734287
A0A0D2K7V6	A0A0D2K7V6_9CHLO	unreviewed	RNA (Guanine-9-)-methyltransferasedomain-containing protein 3	MNEG_1653	Monoraphidium neglectum			methyltransferase activity [GO:0008168]		methyltransferase activity [GO:0008168]		25734298
A0A0D2LIM6	A0A0D2LIM6_9CHLO	unreviewed	Alpha-1,3-glucosyltransferase (EC 2.4.1.-)	MNEG_1654	Monoraphidium neglectum	PATHWAY: Protein modification; protein glycosylation. {ECO:0000256|RuleBase:RU363110}.		endoplasmic reticulum membrane [GO:0005789]; integral component of membrane [GO:0016021]; transferase activity, transferring hexosyl groups [GO:0016758]; protein glycosylation [GO:0006486]	protein glycosylation [GO:0006486]	transferase activity, transferring hexosyl groups [GO:0016758]	endoplasmic reticulum membrane [GO:0005789]; integral component of membrane [GO:0016021]	25734309
A0A0D2MUT1	A0A0D2MUT1_9CHLO	unreviewed	Uncharacterized protein	MNEG_1655	Monoraphidium neglectum			hydrolase activity, hydrolyzing O-glycosyl compounds [GO:0004553]; carbohydrate metabolic process [GO:0005975]	carbohydrate metabolic process [GO:0005975]	hydrolase activity, hydrolyzing O-glycosyl compounds [GO:0004553]		25734320
A0A0D2NPF6	A0A0D2NPF6_9CHLO	unreviewed	Uncharacterized protein	MNEG_1656	Monoraphidium neglectum			hydrolase activity [GO:0016787]; lipid metabolic process [GO:0006629]	lipid metabolic process [GO:0006629]	hydrolase activity [GO:0016787]		25734331
A0A0D2N1A1	A0A0D2N1A1_9CHLO	unreviewed	Uncharacterized protein	MNEG_1657	Monoraphidium neglectum							25734342
A0A0D2LIL8	A0A0D2LIL8_9CHLO	unreviewed	Splicing factor 3B subunit 4	MNEG_1658	Monoraphidium neglectum			RNA binding [GO:0003723]		RNA binding [GO:0003723]		25734353
A0A0D2MUS1	A0A0D2MUS1_9CHLO	unreviewed	Uncharacterized protein	MNEG_1659	Monoraphidium neglectum							25734364
A0A0D2NPF0	A0A0D2NPF0_9CHLO	unreviewed	Uncharacterized protein	MNEG_1660	Monoraphidium neglectum							25734375
A0A0D2N193	A0A0D2N193_9CHLO	unreviewed	Uncharacterized protein	MNEG_1661	Monoraphidium neglectum							25734386
A0A0D2K7V1	A0A0D2K7V1_9CHLO	unreviewed	Uncharacterized protein	MNEG_1662	Monoraphidium neglectum			integral component of membrane [GO:0016021]			integral component of membrane [GO:0016021]	25734397
A0A0D2LIM2	A0A0D2LIM2_9CHLO	unreviewed	Uncharacterized protein	MNEG_1663	Monoraphidium neglectum			2-dehydropantoate 2-reductase activity [GO:0008677]; coenzyme binding [GO:0050662]		2-dehydropantoate 2-reductase activity [GO:0008677]; coenzyme binding [GO:0050662]		25734408
A0A0D2MUS7	A0A0D2MUS7_9CHLO	unreviewed	Uncharacterized protein (Fragment)	MNEG_1664	Monoraphidium neglectum							25734419
A0A0D2LIL0	A0A0D2LIL0_9CHLO	unreviewed	Uncharacterized protein (Fragment)	MNEG_1665	Monoraphidium neglectum							25734430
A0A0D2MUR0	A0A0D2MUR0_9CHLO	unreviewed	Uncharacterized protein	MNEG_1666	Monoraphidium neglectum							25734441
A0A0D2NPE4	A0A0D2NPE4_9CHLO	unreviewed	Uncharacterized protein	MNEG_1667	Monoraphidium neglectum			response to stress [GO:0006950]	response to stress [GO:0006950]			25734452
A0A0D2N184	A0A0D2N184_9CHLO	unreviewed	Uncharacterized protein	MNEG_1668	Monoraphidium neglectum							25734463
A0A0D2K7U3	A0A0D2K7U3_9CHLO	unreviewed	Uncharacterized protein	MNEG_1669	Monoraphidium neglectum			integral component of membrane [GO:0016021]			integral component of membrane [GO:0016021]	25734474
A0A0D2LIL4	A0A0D2LIL4_9CHLO	unreviewed	Uncharacterized protein	MNEG_1670	Monoraphidium neglectum							25734485
A0A0D2MUR5	A0A0D2MUR5_9CHLO	unreviewed	Uncharacterized protein	MNEG_1671	Monoraphidium neglectum							25734496
A0A0D2NPE7	A0A0D2NPE7_9CHLO	unreviewed	Cyclin-B1-1	MNEG_1672	Monoraphidium neglectum			nucleus [GO:0005634]			nucleus [GO:0005634]	25734507
A0A0D2N188	A0A0D2N188_9CHLO	unreviewed	Endoplasmic reticulum-Golgi intermediate compartment protein 3	MNEG_1673	Monoraphidium neglectum			integral component of membrane [GO:0016021]			integral component of membrane [GO:0016021]	25734518
A0A0D2K7U7	A0A0D2K7U7_9CHLO	unreviewed	Uncharacterized protein	MNEG_1674	Monoraphidium neglectum							25734529
A0A0D2N172	A0A0D2N172_9CHLO	unreviewed	Uncharacterized protein	MNEG_1675	Monoraphidium neglectum			flavin adenine dinucleotide binding [GO:0050660]; oxidoreductase activity, acting on CH-OH group of donors [GO:0016614]		flavin adenine dinucleotide binding [GO:0050660]; oxidoreductase activity, acting on CH-OH group of donors [GO:0016614]		25734536
A0A0D2K7S7	A0A0D2K7S7_9CHLO	unreviewed	Uncharacterized protein	MNEG_1676	Monoraphidium neglectum							25734537
A0A0D2LIK2	A0A0D2LIK2_9CHLO	unreviewed	Uncharacterized protein	MNEG_1677	Monoraphidium neglectum							25734538
A0A0D2MUQ3	A0A0D2MUQ3_9CHLO	unreviewed	Uncharacterized protein	MNEG_1678	Monoraphidium neglectum							25734539
A0A0D2NPD7	A0A0D2NPD7_9CHLO	unreviewed	YVTN beta-propeller repeat-containing protein	MNEG_1679	Monoraphidium neglectum							25734540
A0A0D2N175	A0A0D2N175_9CHLO	unreviewed	YVTN beta-propeller repeat-containing protein	MNEG_1680	Monoraphidium neglectum							25734541
A0A0D2K7T4	A0A0D2K7T4_9CHLO	unreviewed	Uncharacterized protein	MNEG_1681	Monoraphidium neglectum							25734543
A0A0D2LIK6	A0A0D2LIK6_9CHLO	unreviewed	Sulfotransferase (EC 2.8.2.-)	MNEG_1682	Monoraphidium neglectum			integral component of membrane [GO:0016021]; sulfotransferase activity [GO:0008146]		sulfotransferase activity [GO:0008146]	integral component of membrane [GO:0016021]	25734554
A0A0D2MUQ8	A0A0D2MUQ8_9CHLO	unreviewed	60S ribosomal protein L7-3	MNEG_1683	Monoraphidium neglectum			ribosome [GO:0005840]			ribosome [GO:0005840]	25734561
A0A0D2NPE1	A0A0D2NPE1_9CHLO	unreviewed	Uncharacterized protein	MNEG_1684	Monoraphidium neglectum			ATP binding [GO:0005524]; protein kinase activity [GO:0004672]		ATP binding [GO:0005524]; protein kinase activity [GO:0004672]		25734562
A0A0D2N179	A0A0D2N179_9CHLO	unreviewed	Uncharacterized protein	MNEG_1685	Monoraphidium neglectum							25734563
A0A0D2K7T8	A0A0D2K7T8_9CHLO	unreviewed	Uncharacterized protein (Fragment)	MNEG_1686	Monoraphidium neglectum							25734564
A0A0D2NPC2	A0A0D2NPC2_9CHLO	unreviewed	Uncharacterized protein	MNEG_1687	Monoraphidium neglectum							25734565
A0A0D2N165	A0A0D2N165_9CHLO	unreviewed	Cell division protease FtsH (EC 3.4.24.-)	MNEG_1688	Monoraphidium neglectum			integral component of membrane [GO:0016021]; ATP binding [GO:0005524]; metalloendopeptidase activity [GO:0004222]; cell division [GO:0051301]	cell division [GO:0051301]	ATP binding [GO:0005524]; metalloendopeptidase activity [GO:0004222]	integral component of membrane [GO:0016021]	25734566
A0A0D2K7R0	A0A0D2K7R0_9CHLO	unreviewed	Ankyrin-1	MNEG_1689	Monoraphidium neglectum							25734567
A0A0D2LIJ6	A0A0D2LIJ6_9CHLO	unreviewed	Uncharacterized protein	MNEG_1690	Monoraphidium neglectum							25734568
A0A0D2MUP5	A0A0D2MUP5_9CHLO	unreviewed	Uncharacterized protein	MNEG_1691	Monoraphidium neglectum							25734569
A0A0D2NPC9	A0A0D2NPC9_9CHLO	unreviewed	Inner membrane protein alx	MNEG_1692	Monoraphidium neglectum			integral component of membrane [GO:0016021]			integral component of membrane [GO:0016021]	25734570
A0A0D2N169	A0A0D2N169_9CHLO	unreviewed	Ribosomal protein S7	MNEG_1693	Monoraphidium neglectum			ribosome [GO:0005840]; translation [GO:0006412]	translation [GO:0006412]		ribosome [GO:0005840]	25734571
A0A0D2K7R7	A0A0D2K7R7_9CHLO	unreviewed	Uncharacterized protein	MNEG_1694	Monoraphidium neglectum							25734572
A0A0D2LIK0	A0A0D2LIK0_9CHLO	unreviewed	Uncharacterized protein	MNEG_1695	Monoraphidium neglectum							25734573
A0A0D2MUQ0	A0A0D2MUQ0_9CHLO	unreviewed	Uncharacterized protein	MNEG_1696	Monoraphidium neglectum			integral component of membrane [GO:0016021]			integral component of membrane [GO:0016021]	25734574
A0A0D2NPD3	A0A0D2NPD3_9CHLO	unreviewed	Uncharacterized protein (Fragment)	MNEG_1697	Monoraphidium neglectum							25734575
A0A0D2K7Q0	A0A0D2K7Q0_9CHLO	unreviewed	Uncharacterized protein (Fragment)	MNEG_1698	Monoraphidium neglectum							25734576
A0A0D2LII6	A0A0D2LII6_9CHLO	unreviewed	Pentatricopeptide repeat-containing protein	MNEG_1699	Monoraphidium neglectum							25734577
A0A0D2MUP0	A0A0D2MUP0_9CHLO	unreviewed	Coproporphyrinogen III oxidase (EC 1.3.3.3)	MNEG_1700	Monoraphidium neglectum			coproporphyrinogen oxidase activity [GO:0004109]; porphyrin-containing compound biosynthetic process [GO:0006779]	porphyrin-containing compound biosynthetic process [GO:0006779]	coproporphyrinogen oxidase activity [GO:0004109]		25734578
A0A0D2NPB5	A0A0D2NPB5_9CHLO	unreviewed	Uncharacterized protein	MNEG_1701	Monoraphidium neglectum							25734579
A0A0D2N160	A0A0D2N160_9CHLO	unreviewed	Uncharacterized protein	MNEG_1702	Monoraphidium neglectum							25734580
A0A0D2K7Q5	A0A0D2K7Q5_9CHLO	unreviewed	Uncharacterized protein	MNEG_1703	Monoraphidium neglectum							25734581
A0A0D2LIJ1	A0A0D2LIJ1_9CHLO	unreviewed	Uncharacterized protein	MNEG_1704	Monoraphidium neglectum							25734582
A0A0D2MUP2	A0A0D2MUP2_9CHLO	unreviewed	Uncharacterized protein	MNEG_1705	Monoraphidium neglectum							25734583
A0A0D2MUN4	A0A0D2MUN4_9CHLO	unreviewed	Uncharacterized protein	MNEG_1706	Monoraphidium neglectum			integral component of membrane [GO:0016021]			integral component of membrane [GO:0016021]	25734584
A0A0D2NPA3	A0A0D2NPA3_9CHLO	unreviewed	Flagellar associated protein	MNEG_1707	Monoraphidium neglectum			motile cilium [GO:0031514]			motile cilium [GO:0031514]	25734585
A0A0D2N151	A0A0D2N151_9CHLO	unreviewed	Kinesin-like protein	MNEG_1708	Monoraphidium neglectum			microtubule [GO:0005874]; ATP binding [GO:0005524]; microtubule binding [GO:0008017]; microtubule motor activity [GO:0003777]; microtubule-based movement [GO:0007018]	microtubule-based movement [GO:0007018]	ATP binding [GO:0005524]; microtubule binding [GO:0008017]; microtubule motor activity [GO:0003777]	microtubule [GO:0005874]	25734586
A0A0D2K7P5	A0A0D2K7P5_9CHLO	unreviewed	Uncharacterized protein	MNEG_1709	Monoraphidium neglectum							25734587
A0A0D2LII3	A0A0D2LII3_9CHLO	unreviewed	Uncharacterized protein	MNEG_1710	Monoraphidium neglectum			catalytic activity [GO:0003824]		catalytic activity [GO:0003824]		25734588
A0A0D2MUN5	A0A0D2MUN5_9CHLO	unreviewed	Methionyl aminopeptidase (EC 3.4.11.18)	MNEG_1711	Monoraphidium neglectum			aminopeptidase activity [GO:0004177]; metalloexopeptidase activity [GO:0008235]		aminopeptidase activity [GO:0004177]; metalloexopeptidase activity [GO:0008235]		25734589
A0A0D2NPA9	A0A0D2NPA9_9CHLO	unreviewed	Uncharacterized protein	MNEG_1712	Monoraphidium neglectum							25734590
A0A0D2N156	A0A0D2N156_9CHLO	unreviewed	Uncharacterized protein	MNEG_1713	Monoraphidium neglectum							25734591
A0A0D2N143	A0A0D2N143_9CHLO	unreviewed	Uncharacterized protein	MNEG_1714	Monoraphidium neglectum							25734592
A0A0D2K7P0	A0A0D2K7P0_9CHLO	unreviewed	ER lumen protein retaining receptor	MNEG_1715	Monoraphidium neglectum			endoplasmic reticulum [GO:0005783]; integral component of membrane [GO:0016021]; ER retention sequence binding [GO:0046923]; protein retention in ER lumen [GO:0006621]	protein retention in ER lumen [GO:0006621]	ER retention sequence binding [GO:0046923]	endoplasmic reticulum [GO:0005783]; integral component of membrane [GO:0016021]	25734593
A0A0D2LIH4	A0A0D2LIH4_9CHLO	unreviewed	Uncharacterized protein	MNEG_1716	Monoraphidium neglectum							25734594
A0A0D2MUM9	A0A0D2MUM9_9CHLO	unreviewed	Uncharacterized protein	MNEG_1717	Monoraphidium neglectum							25734595
A0A0D2NP98	A0A0D2NP98_9CHLO	unreviewed	Uncharacterized protein	MNEG_1718	Monoraphidium neglectum							25734596
A0A0D2N147	A0A0D2N147_9CHLO	unreviewed	Putative WD repeat-containing protein 89 like protein	MNEG_1719	Monoraphidium neglectum							25734597
A0A0D2K7P2	A0A0D2K7P2_9CHLO	unreviewed	Uncharacterized protein	MNEG_1720	Monoraphidium neglectum							25734598
A0A0D2LIH9	A0A0D2LIH9_9CHLO	unreviewed	Uncharacterized protein	MNEG_1721	Monoraphidium neglectum			integral component of membrane [GO:0016021]			integral component of membrane [GO:0016021]	25734599
A0A0D2LIG8	A0A0D2LIG8_9CHLO	unreviewed	Uncharacterized protein (Fragment)	MNEG_1722	Monoraphidium neglectum			integral component of membrane [GO:0016021]			integral component of membrane [GO:0016021]	25734600
A0A0D2MUL7	A0A0D2MUL7_9CHLO	unreviewed	Uncharacterized protein	MNEG_1723	Monoraphidium neglectum			integral component of membrane [GO:0016021]			integral component of membrane [GO:0016021]	25734601
A0A0D2NP90	A0A0D2NP90_9CHLO	unreviewed	Uncharacterized protein	MNEG_1724	Monoraphidium neglectum							25734602
A0A0D2N138	A0A0D2N138_9CHLO	unreviewed	Ribonuclease Z (EC 3.1.26.11)	MNEG_1725	Monoraphidium neglectum			hydrolase activity [GO:0016787]; RNA binding [GO:0003723]		hydrolase activity [GO:0016787]; RNA binding [GO:0003723]		25734603
A0A0D2K7N6	A0A0D2K7N6_9CHLO	unreviewed	Uncharacterized protein	MNEG_1726	Monoraphidium neglectum			methyltransferase activity [GO:0008168]; protein methylation [GO:0006479]	protein methylation [GO:0006479]	methyltransferase activity [GO:0008168]		25734604
A0A0D2LIH2	A0A0D2LIH2_9CHLO	unreviewed	6,7-dimethyl-8-ribityllumazine synthase (DMRL synthase) (EC 2.5.1.78)	MNEG_1727	Monoraphidium neglectum	PATHWAY: Cofactor biosynthesis; riboflavin biosynthesis; riboflavin from 2-hydroxy-3-oxobutyl phosphate and 5-amino-6-(D-ribitylamino)uracil: step 1/2. {ECO:0000256|RuleBase:RU003795}.	CATALYTIC ACTIVITY: 1-deoxy-L-glycero-tetrulose 4-phosphate + 5-amino-6-(D-ribitylamino)uracil = 6,7-dimethyl-8-(D-ribityl)lumazine + 2 H(2)O + phosphate. {ECO:0000256|RuleBase:RU003795}.	riboflavin synthase complex [GO:0009349]; 6,7-dimethyl-8-ribityllumazine synthase activity [GO:0000906]; transferase activity [GO:0016740]; riboflavin biosynthetic process [GO:0009231]	riboflavin biosynthetic process [GO:0009231]	6,7-dimethyl-8-ribityllumazine synthase activity [GO:0000906]; transferase activity [GO:0016740]	riboflavin synthase complex [GO:0009349]	25734605
A0A0D2MUM4	A0A0D2MUM4_9CHLO	unreviewed	Uncharacterized protein	MNEG_1728	Monoraphidium neglectum							25734606
A0A0D2NP93	A0A0D2NP93_9CHLO	unreviewed	J domain-containing protein spf31	MNEG_1729	Monoraphidium neglectum							25734607
A0A0D2K7M2	A0A0D2K7M2_9CHLO	unreviewed	Glyoxal or galactose oxidase	MNEG_1730	Monoraphidium neglectum			extracellular region [GO:0005576]; chitin binding [GO:0008061]; chitin metabolic process [GO:0006030]	chitin metabolic process [GO:0006030]	chitin binding [GO:0008061]	extracellular region [GO:0005576]	25734608
A0A0D2LIG2	A0A0D2LIG2_9CHLO	unreviewed	Uncharacterized protein	MNEG_1731	Monoraphidium neglectum			integral component of membrane [GO:0016021]			integral component of membrane [GO:0016021]	25734609
A0A0D2MUK1	A0A0D2MUK1_9CHLO	unreviewed	60S ribosomal protein L32-1	MNEG_1732	Monoraphidium neglectum			ribosome [GO:0005840]; structural constituent of ribosome [GO:0003735]; translation [GO:0006412]	translation [GO:0006412]	structural constituent of ribosome [GO:0003735]	ribosome [GO:0005840]	25734610
A0A0D2NP79	A0A0D2NP79_9CHLO	unreviewed	Uncharacterized protein	MNEG_1733	Monoraphidium neglectum							25734611
A0A0D2N130	A0A0D2N130_9CHLO	unreviewed	Uncharacterized protein	MNEG_1734	Monoraphidium neglectum							25734612
A0A0D2K7M9	A0A0D2K7M9_9CHLO	unreviewed	S-acyltransferase (EC 2.3.1.225) (Palmitoyltransferase)	MNEG_1735	Monoraphidium neglectum		CATALYTIC ACTIVITY: Palmitoyl-CoA + [protein]-L-cysteine = [protein]-S-palmitoyl-L-cysteine + CoA. {ECO:0000256|RuleBase:RU079119}.	integral component of membrane [GO:0016021]; protein-cysteine S-palmitoyltransferase activity [GO:0019706]		protein-cysteine S-palmitoyltransferase activity [GO:0019706]	integral component of membrane [GO:0016021]	25734613
A0A0D2LIG5	A0A0D2LIG5_9CHLO	unreviewed	Uncharacterized protein	MNEG_1736	Monoraphidium neglectum			nucleus [GO:0005634]; DNA replication [GO:0006260]	DNA replication [GO:0006260]		nucleus [GO:0005634]	25734614
A0A0D2MUK6	A0A0D2MUK6_9CHLO	unreviewed	tRNA pseudouridine synthase (EC 5.4.99.-)	MNEG_1737	Monoraphidium neglectum		CATALYTIC ACTIVITY: tRNA uridine(38-40) = tRNA pseudouridine(38-40). {ECO:0000256|RuleBase:RU003792}.	pseudouridine synthase activity [GO:0009982]; RNA binding [GO:0003723]; pseudouridine synthesis [GO:0001522]; tRNA processing [GO:0008033]	pseudouridine synthesis [GO:0001522]; tRNA processing [GO:0008033]	pseudouridine synthase activity [GO:0009982]; RNA binding [GO:0003723]		25734615
A0A0D2NP86	A0A0D2NP86_9CHLO	unreviewed	Serine/threonine-protein phosphatase (EC 3.1.3.16)	MNEG_1738	Monoraphidium neglectum		CATALYTIC ACTIVITY: [a protein]-serine/threonine phosphate + H(2)O = [a protein]-serine/threonine + phosphate. {ECO:0000256|RuleBase:RU004273, ECO:0000256|SAAS:SAAS00324755}.	metal ion binding [GO:0046872]; phosphoprotein phosphatase activity [GO:0004721]		metal ion binding [GO:0046872]; phosphoprotein phosphatase activity [GO:0004721]		25734616
A0A0D2N133	A0A0D2N133_9CHLO	unreviewed	Uncharacterized protein	MNEG_1739	Monoraphidium neglectum							25734617
A0A0D2K7N4	A0A0D2K7N4_9CHLO	unreviewed	Uncharacterized protein (Fragment)	MNEG_1740	Monoraphidium neglectum							25734618
A0A0D2MUJ4	A0A0D2MUJ4_9CHLO	unreviewed	Uncharacterized protein	MNEG_1741	Monoraphidium neglectum							25734619
A0A0D2NP67	A0A0D2NP67_9CHLO	unreviewed	Uncharacterized protein	MNEG_1742	Monoraphidium neglectum							25734620
A0A0D2N121	A0A0D2N121_9CHLO	unreviewed	Uncharacterized protein	MNEG_1743	Monoraphidium neglectum							25734621
A0A0D2K7L4	A0A0D2K7L4_9CHLO	unreviewed	Zinc finger CCCH domain-containing protein 35	MNEG_1744	Monoraphidium neglectum			metal ion binding [GO:0046872]		metal ion binding [GO:0046872]		25734622
A0A0D2LIF9	A0A0D2LIF9_9CHLO	unreviewed	Uncharacterized protein	MNEG_1745	Monoraphidium neglectum			hydrolase activity, hydrolyzing O-glycosyl compounds [GO:0004553]; carbohydrate metabolic process [GO:0005975]	carbohydrate metabolic process [GO:0005975]	hydrolase activity, hydrolyzing O-glycosyl compounds [GO:0004553]		25734623
A0A0D2MUJ7	A0A0D2MUJ7_9CHLO	unreviewed	Uncharacterized protein	MNEG_1746	Monoraphidium neglectum							25734624
A0A0D2NP73	A0A0D2NP73_9CHLO	unreviewed	Uncharacterized protein	MNEG_1747	Monoraphidium neglectum							25734625
A0A0D2N126	A0A0D2N126_9CHLO	unreviewed	Leucyl-tRNA synthetase (EC 6.1.1.4)	MNEG_1748	Monoraphidium neglectum			cytoplasm [GO:0005737]; ATP binding [GO:0005524]; leucine-tRNA ligase activity [GO:0004823]; leucyl-tRNA aminoacylation [GO:0006429]	leucyl-tRNA aminoacylation [GO:0006429]	ATP binding [GO:0005524]; leucine-tRNA ligase activity [GO:0004823]	cytoplasm [GO:0005737]	25734626
A0A0D2K7J4	A0A0D2K7J4_9CHLO	unreviewed	Uncharacterized protein (Fragment)	MNEG_1749	Monoraphidium neglectum			integral component of Golgi membrane [GO:0030173]; intra-Golgi vesicle-mediated transport [GO:0006891]	intra-Golgi vesicle-mediated transport [GO:0006891]		integral component of Golgi membrane [GO:0030173]	25734627
A0A0D2LIE7	A0A0D2LIE7_9CHLO	unreviewed	Uncharacterized protein	MNEG_1750	Monoraphidium neglectum							25734628
A0A0D2MUI8	A0A0D2MUI8_9CHLO	unreviewed	Uncharacterized protein	MNEG_1751	Monoraphidium neglectum			GTP binding [GO:0005525]; GTPase activity [GO:0003924]		GTPase activity [GO:0003924]; GTP binding [GO:0005525]		25734629
A0A0D2NP56	A0A0D2NP56_9CHLO	unreviewed	Inner centromere protein	MNEG_1752	Monoraphidium neglectum							25734630
A0A0D2N114	A0A0D2N114_9CHLO	unreviewed	Uncharacterized protein	MNEG_1753	Monoraphidium neglectum							25734631
A0A0D2K7K1	A0A0D2K7K1_9CHLO	unreviewed	Uncharacterized protein	MNEG_1754	Monoraphidium neglectum							25734632
A0A0D2LIF1	A0A0D2LIF1_9CHLO	unreviewed	Uncharacterized protein	MNEG_1755	Monoraphidium neglectum							25734633
A0A0D2MUJ2	A0A0D2MUJ2_9CHLO	unreviewed	Uncharacterized protein	MNEG_1756	Monoraphidium neglectum							25734634
A0A0D2NP61	A0A0D2NP61_9CHLO	unreviewed	Uncharacterized protein	MNEG_1757	Monoraphidium neglectum			positive regulation of circadian rhythm [GO:0042753]	positive regulation of circadian rhythm [GO:0042753]			25734635
A0A0D2N118	A0A0D2N118_9CHLO	unreviewed	Peroxin-5	MNEG_1758	Monoraphidium neglectum							25734636
A0A0D2K7K9	A0A0D2K7K9_9CHLO	unreviewed	Putative hexose phosphate transport protein	MNEG_1759	Monoraphidium neglectum			integral component of membrane [GO:0016021]; transporter activity [GO:0005215]; transmembrane transport [GO:0055085]	transmembrane transport [GO:0055085]	transporter activity [GO:0005215]	integral component of membrane [GO:0016021]	25734637
A0A0D2LIF6	A0A0D2LIF6_9CHLO	unreviewed	Ribosomal RNA-processing protein 12	MNEG_1760	Monoraphidium neglectum							25734638
A0A0D2K7I8	A0A0D2K7I8_9CHLO	unreviewed	Uncharacterized protein	MNEG_1761	Monoraphidium neglectum							25734639
A0A0D2LIE4	A0A0D2LIE4_9CHLO	unreviewed	Uncharacterized protein	MNEG_1762	Monoraphidium neglectum							25734640
A0A0D2MUI5	A0A0D2MUI5_9CHLO	unreviewed	Chlorophyllase I (EC 3.1.1.14)	MNEG_1763	Monoraphidium neglectum			chlorophyllase activity [GO:0047746]; pheophytinase b activity [GO:0102293]; chlorophyll catabolic process [GO:0015996]	chlorophyll catabolic process [GO:0015996]	chlorophyllase activity [GO:0047746]; pheophytinase b activity [GO:0102293]		25734641
A0A0D2NP50	A0A0D2NP50_9CHLO	unreviewed	Flagellar associated protein	MNEG_1764	Monoraphidium neglectum			integral component of membrane [GO:0016021]; motile cilium [GO:0031514]			integral component of membrane [GO:0016021]; motile cilium [GO:0031514]	25734642
A0A0D2N110	A0A0D2N110_9CHLO	unreviewed	Uncharacterized protein	MNEG_1765	Monoraphidium neglectum							25734643
A0A0D2K7I2	A0A0D2K7I2_9CHLO	unreviewed	Uncharacterized protein	MNEG_1766	Monoraphidium neglectum			metabolic process [GO:0008152]	metabolic process [GO:0008152]			25734644
A0A0D2LIE1	A0A0D2LIE1_9CHLO	unreviewed	Golgi apparatus protein	MNEG_1767	Monoraphidium neglectum			Golgi membrane [GO:0000139]; integral component of membrane [GO:0016021]			Golgi membrane [GO:0000139]; integral component of membrane [GO:0016021]	25734645
A0A0D2MUI1	A0A0D2MUI1_9CHLO	unreviewed	Uncharacterized protein	MNEG_1768	Monoraphidium neglectum			integral component of membrane [GO:0016021]; hydrolase activity, hydrolyzing O-glycosyl compounds [GO:0004553]; carbohydrate metabolic process [GO:0005975]	carbohydrate metabolic process [GO:0005975]	hydrolase activity, hydrolyzing O-glycosyl compounds [GO:0004553]	integral component of membrane [GO:0016021]	25734646
A0A0D2NP45	A0A0D2NP45_9CHLO	unreviewed	Uncharacterized protein	MNEG_1769	Monoraphidium neglectum			integral component of membrane [GO:0016021]			integral component of membrane [GO:0016021]	25734647
A0A0D2N107	A0A0D2N107_9CHLO	unreviewed	Uncharacterized protein	MNEG_1770	Monoraphidium neglectum							25734648
A0A0D2MUH6	A0A0D2MUH6_9CHLO	unreviewed	Uncharacterized protein (Fragment)	MNEG_1771	Monoraphidium neglectum							25734649
A0A0D2NP35	A0A0D2NP35_9CHLO	unreviewed	Mannose-P-dolichol utilization defect 1	MNEG_1772	Monoraphidium neglectum			integral component of membrane [GO:0016021]			integral component of membrane [GO:0016021]	25734650
A0A0D2N0Z9	A0A0D2N0Z9_9CHLO	unreviewed	Uncharacterized protein	MNEG_1773	Monoraphidium neglectum							25734651
A0A0D2K7H2	A0A0D2K7H2_9CHLO	unreviewed	Probable tRNA N6-adenosine threonylcarbamoyltransferase, mitochondrial (EC 2.3.1.234) (Glycoprotease 1) (N6-L-threonylcarbamoyladenine synthase) (t(6)A37 threonylcarbamoyladenosine biosynthesis protein GCP1) (tRNA threonylcarbamoyladenosine biosynthesis protein GCP1) (t(6)A synthase)	GCP1 MNEG_1774	Monoraphidium neglectum		CATALYTIC ACTIVITY: L-threonylcarbamoyladenylate + adenine(37) in tRNA = AMP + N(6)-L-threonylcarbamoyladenine(37) in tRNA. {ECO:0000256|HAMAP-Rule:MF_03179}.	mitochondrion [GO:0005739]; metal ion binding [GO:0046872]; metalloendopeptidase activity [GO:0004222]; N(6)-L-threonylcarbamoyladenine synthase [GO:0061711]; tRNA threonylcarbamoyladenosine modification [GO:0002949]	tRNA threonylcarbamoyladenosine modification [GO:0002949]	metal ion binding [GO:0046872]; metalloendopeptidase activity [GO:0004222]; N(6)-L-threonylcarbamoyladenine synthase [GO:0061711]	mitochondrion [GO:0005739]	25734652
A0A0D2LID6	A0A0D2LID6_9CHLO	unreviewed	Serine/threonine-protein kinase plk-3 (EC 2.7.11.21)	MNEG_1775	Monoraphidium neglectum			ATP binding [GO:0005524]; protein kinase activity [GO:0004672]		ATP binding [GO:0005524]; protein kinase activity [GO:0004672]		25734653
A0A0D2MUH9	A0A0D2MUH9_9CHLO	unreviewed	Uncharacterized protein	MNEG_1776	Monoraphidium neglectum							25734654
A0A0D2NP41	A0A0D2NP41_9CHLO	unreviewed	Uncharacterized protein	MNEG_1777	Monoraphidium neglectum							25734655
A0A0D2N102	A0A0D2N102_9CHLO	unreviewed	MYC-induced nuclear antigen	MNEG_1778	Monoraphidium neglectum							25734656
A0A0D2LID1	A0A0D2LID1_9CHLO	unreviewed	Uncharacterized protein	MNEG_1779	Monoraphidium neglectum							25734657
A0A0D2MUH3	A0A0D2MUH3_9CHLO	unreviewed	Uncharacterized protein	MNEG_1780	Monoraphidium neglectum							25734658
A0A0D2NP31	A0A0D2NP31_9CHLO	unreviewed	Uncharacterized protein	MNEG_1781	Monoraphidium neglectum							25734659
A0A0D2N0Z6	A0A0D2N0Z6_9CHLO	unreviewed	Uncharacterized protein	MNEG_1782	Monoraphidium neglectum			hydrolase activity, hydrolyzing O-glycosyl compounds [GO:0004553]; carbohydrate metabolic process [GO:0005975]	carbohydrate metabolic process [GO:0005975]	hydrolase activity, hydrolyzing O-glycosyl compounds [GO:0004553]		25734660
A0A0D2K7G7	A0A0D2K7G7_9CHLO	unreviewed	Nef-associated protein 1	MNEG_1783	Monoraphidium neglectum							25734661
A0A0D2LID4	A0A0D2LID4_9CHLO	unreviewed	Uncharacterized protein	MNEG_1784	Monoraphidium neglectum			protein serine/threonine phosphatase activity [GO:0004722]		protein serine/threonine phosphatase activity [GO:0004722]		25734662
A0A0D2MUG6	A0A0D2MUG6_9CHLO	unreviewed	Uncharacterized protein	MNEG_1785	Monoraphidium neglectum							25734663
A0A0D2NP22	A0A0D2NP22_9CHLO	unreviewed	Uncharacterized protein	MNEG_1786	Monoraphidium neglectum							25734664
A0A0D2N0Y5	A0A0D2N0Y5_9CHLO	unreviewed	Oligopeptidase B (EC 3.4.21.83)	MNEG_1787	Monoraphidium neglectum			serine-type endopeptidase activity [GO:0004252]; serine-type exopeptidase activity [GO:0070008]		serine-type endopeptidase activity [GO:0004252]; serine-type exopeptidase activity [GO:0070008]		25734665
A0A0D2K7F9	A0A0D2K7F9_9CHLO	unreviewed	Uncharacterized protein	MNEG_1788	Monoraphidium neglectum			integral component of membrane [GO:0016021]; gamma-glutamylcyclotransferase activity [GO:0003839]		gamma-glutamylcyclotransferase activity [GO:0003839]	integral component of membrane [GO:0016021]	25734666
A0A0D2LIC7	A0A0D2LIC7_9CHLO	unreviewed	Uncharacterized protein	MNEG_1789	Monoraphidium neglectum			integral component of membrane [GO:0016021]			integral component of membrane [GO:0016021]	25734667
A0A0D2MUG9	A0A0D2MUG9_9CHLO	unreviewed	Uncharacterized protein	MNEG_1790	Monoraphidium neglectum			nucleus [GO:0005634]; ATP binding [GO:0005524]; ATP-dependent RNA helicase activity [GO:0004004]; RNA binding [GO:0003723]		ATP binding [GO:0005524]; ATP-dependent RNA helicase activity [GO:0004004]; RNA binding [GO:0003723]	nucleus [GO:0005634]	25734668
A0A0D2NP28	A0A0D2NP28_9CHLO	unreviewed	Uncharacterized protein	MNEG_1791	Monoraphidium neglectum							25734669
A0A0D2N0Z1	A0A0D2N0Z1_9CHLO	unreviewed	Uncharacterized protein	MNEG_1792	Monoraphidium neglectum			nucleoside-triphosphate diphosphatase activity [GO:0047429]; nucleoside triphosphate catabolic process [GO:0009143]	nucleoside triphosphate catabolic process [GO:0009143]	nucleoside-triphosphate diphosphatase activity [GO:0047429]		25734670
A0A0D2K7G3	A0A0D2K7G3_9CHLO	unreviewed	Uncharacterized protein	MNEG_1793	Monoraphidium neglectum							25734671
A0A0D2NP17	A0A0D2NP17_9CHLO	unreviewed	Uncharacterized protein	MNEG_1794	Monoraphidium neglectum			integral component of membrane [GO:0016021]; ATP binding [GO:0005524]; protein kinase activity [GO:0004672]		ATP binding [GO:0005524]; protein kinase activity [GO:0004672]	integral component of membrane [GO:0016021]	25734672
A0A0D2N0Y4	A0A0D2N0Y4_9CHLO	unreviewed	Uncharacterized protein	MNEG_1795	Monoraphidium neglectum							25734673
A0A0D2K7F4	A0A0D2K7F4_9CHLO	unreviewed	Uncharacterized protein	MNEG_1796	Monoraphidium neglectum							25734674
A0A0D2LIC5	A0A0D2LIC5_9CHLO	unreviewed	Uncharacterized protein	MNEG_1797	Monoraphidium neglectum			integral component of membrane [GO:0016021]			integral component of membrane [GO:0016021]	25734675
A0A0D2N0X6	A0A0D2N0X6_9CHLO	unreviewed	Exostosin-like glycosyltransferase	MNEG_1798	Monoraphidium neglectum			transferase activity [GO:0016740]		transferase activity [GO:0016740]		25734676
A0A0D2K7E4	A0A0D2K7E4_9CHLO	unreviewed	UDP-glucuronosyltransferase 3A1	MNEG_1799	Monoraphidium neglectum			integral component of membrane [GO:0016021]; transferase activity, transferring hexosyl groups [GO:0016758]; metabolic process [GO:0008152]	metabolic process [GO:0008152]	transferase activity, transferring hexosyl groups [GO:0016758]	integral component of membrane [GO:0016021]	25734677
A0A0D2LIB8	A0A0D2LIB8_9CHLO	unreviewed	Uncharacterized protein	MNEG_1800	Monoraphidium neglectum			integral component of membrane [GO:0016021]; GTP binding [GO:0005525]; GTPase activity [GO:0003924]		GTPase activity [GO:0003924]; GTP binding [GO:0005525]	integral component of membrane [GO:0016021]	25734678
A0A0D2MUG2	A0A0D2MUG2_9CHLO	unreviewed	Uncharacterized protein	MNEG_1801	Monoraphidium neglectum							25734679
A0A0D2NP12	A0A0D2NP12_9CHLO	unreviewed	Uncharacterized protein	MNEG_1802	Monoraphidium neglectum							25734680
A0A0D2N0Y0	A0A0D2N0Y0_9CHLO	unreviewed	Uncharacterized protein	MNEG_1803	Monoraphidium neglectum							25734681
A0A0D2K7F0	A0A0D2K7F0_9CHLO	unreviewed	Zinc finger CCCH domain-containing protein 37	MNEG_1804	Monoraphidium neglectum							25734682
A0A0D2LIC2	A0A0D2LIC2_9CHLO	unreviewed	Uncharacterized protein	MNEG_1805	Monoraphidium neglectum			nucleic acid binding [GO:0003676]; zinc ion binding [GO:0008270]		nucleic acid binding [GO:0003676]; zinc ion binding [GO:0008270]		25734683
A0A0D2MUG5	A0A0D2MUG5_9CHLO	unreviewed	Uncharacterized protein	MNEG_1806	Monoraphidium neglectum							25734684
A0A0D2N0V2	A0A0D2N0V2_9CHLO	unreviewed	Uncharacterized protein (Fragment)	MNEG_1807	Monoraphidium neglectum							25734685
A0A0D2K7A8	A0A0D2K7A8_9CHLO	unreviewed	Uncharacterized protein	MNEG_1808	Monoraphidium neglectum			integral component of membrane [GO:0016021]			integral component of membrane [GO:0016021]	25734686
A0A0D2LI90	A0A0D2LI90_9CHLO	unreviewed	Uncharacterized protein	MNEG_1809	Monoraphidium neglectum							25734687
A0A0D2MUF0	A0A0D2MUF0_9CHLO	unreviewed	Uncharacterized protein	MNEG_1810	Monoraphidium neglectum			ATP binding [GO:0005524]; protein kinase activity [GO:0004672]		ATP binding [GO:0005524]; protein kinase activity [GO:0004672]		25734688
A0A0D2NP02	A0A0D2NP02_9CHLO	unreviewed	Uncharacterized protein	MNEG_1811	Monoraphidium neglectum							25734689
A0A0D2N0W8	A0A0D2N0W8_9CHLO	unreviewed	Lipase	MNEG_1812	Monoraphidium neglectum			integral component of membrane [GO:0016021]; hydrolase activity [GO:0016787]; lipid metabolic process [GO:0006629]	lipid metabolic process [GO:0006629]	hydrolase activity [GO:0016787]	integral component of membrane [GO:0016021]	25734690
A0A0D2K7D8	A0A0D2K7D8_9CHLO	unreviewed	Uncharacterized protein yqjG	MNEG_1813	Monoraphidium neglectum			ATP binding [GO:0005524]; heat shock protein binding [GO:0031072]; metal ion binding [GO:0046872]; unfolded protein binding [GO:0051082]; protein folding [GO:0006457]; response to heat [GO:0009408]	protein folding [GO:0006457]; response to heat [GO:0009408]	ATP binding [GO:0005524]; heat shock protein binding [GO:0031072]; metal ion binding [GO:0046872]; unfolded protein binding [GO:0051082]		25734691
A0A0D2LIB3	A0A0D2LIB3_9CHLO	unreviewed	Uncharacterized protein	MNEG_1814	Monoraphidium neglectum							25734692
A0A0D2MUF8	A0A0D2MUF8_9CHLO	unreviewed	Uncharacterized protein	MNEG_1815	Monoraphidium neglectum			oxidoreductase activity [GO:0016491]		oxidoreductase activity [GO:0016491]		25734693
A0A0D2NP09	A0A0D2NP09_9CHLO	unreviewed	Uncharacterized protein	MNEG_1816	Monoraphidium neglectum							25734694
A0A0D2N0T8	A0A0D2N0T8_9CHLO	unreviewed	Uncharacterized protein	MNEG_1817	Monoraphidium neglectum			integral component of membrane [GO:0016021]; nitrate transport [GO:0015706]; response to nitrate [GO:0010167]	nitrate transport [GO:0015706]; response to nitrate [GO:0010167]		integral component of membrane [GO:0016021]	25734695
A0A0D2K794	A0A0D2K794_9CHLO	unreviewed	Uncharacterized protein	MNEG_1818	Monoraphidium neglectum							25734696
A0A0D2LI72	A0A0D2LI72_9CHLO	unreviewed	Uncharacterized protein	MNEG_1819	Monoraphidium neglectum							25734697
A0A0D2MUC8	A0A0D2MUC8_9CHLO	unreviewed	Uncharacterized protein	MNEG_1820	Monoraphidium neglectum							25734698
A0A0D2NNV5	A0A0D2NNV5_9CHLO	unreviewed	Uncharacterized protein	MNEG_1821	Monoraphidium neglectum							25734699
A0A0D2N0U4	A0A0D2N0U4_9CHLO	unreviewed	Uncharacterized protein	MNEG_1822	Monoraphidium neglectum							25734700
A0A0D2K7A0	A0A0D2K7A0_9CHLO	unreviewed	Uncharacterized protein	MNEG_1823	Monoraphidium neglectum							25734701
A0A0D2LI80	A0A0D2LI80_9CHLO	unreviewed	Uncharacterized protein	MNEG_1824	Monoraphidium neglectum							25734702
A0A0D2MUD4	A0A0D2MUD4_9CHLO	unreviewed	Uncharacterized protein	MNEG_1825	Monoraphidium neglectum			nucleic acid binding [GO:0003676]; zinc ion binding [GO:0008270]		nucleic acid binding [GO:0003676]; zinc ion binding [GO:0008270]		25734703
A0A0D2NNW3	A0A0D2NNW3_9CHLO	unreviewed	Uncharacterized protein (Fragment)	MNEG_1826	Monoraphidium neglectum							25734704
A0A0D2K780	A0A0D2K780_9CHLO	unreviewed	SH3 domain-containing protein	MNEG_1827	Monoraphidium neglectum							25734705
A0A0D2LI46	A0A0D2LI46_9CHLO	unreviewed	Transforming protein Myb	MNEG_1828	Monoraphidium neglectum			DNA binding [GO:0003677]		DNA binding [GO:0003677]		25734706
A0A0D2MUB6	A0A0D2MUB6_9CHLO	unreviewed	Uncharacterized protein	MNEG_1829	Monoraphidium neglectum							25734707
A0A0D2NNU3	A0A0D2NNU3_9CHLO	unreviewed	60S ribosomal protein L7-3	MNEG_1830	Monoraphidium neglectum			ribosome [GO:0005840]			ribosome [GO:0005840]	25734708
A0A0D2N0S9	A0A0D2N0S9_9CHLO	unreviewed	Uncharacterized protein	MNEG_1831	Monoraphidium neglectum			ribosome [GO:0005840]; RNA binding [GO:0003723]; structural constituent of ribosome [GO:0003735]; translation [GO:0006412]	translation [GO:0006412]	RNA binding [GO:0003723]; structural constituent of ribosome [GO:0003735]	ribosome [GO:0005840]	25734709
A0A0D2K788	A0A0D2K788_9CHLO	unreviewed	Uncharacterized protein	MNEG_1832	Monoraphidium neglectum			serine-type endopeptidase activity [GO:0004252]		serine-type endopeptidase activity [GO:0004252]		25734710
A0A0D2LI58	A0A0D2LI58_9CHLO	unreviewed	Glutamyl endopeptidase (EC 3.4.21.19)	MNEG_1833	Monoraphidium neglectum			serine-type endopeptidase activity [GO:0004252]		serine-type endopeptidase activity [GO:0004252]		25734711
[truncated: 14,914 more rows]
